# Supplementary material
Source: Research Square preprint supplement (doi:10.21203/rs.3.rs-9102906/v1)

# Supplementary Information

## Enabling high-turnover methanol-to-syngas reforming

Andreas Bonde<sup>1,2\*‡</sup>, Gabriel M. F. Batista<sup>1,2\*‡</sup>, Michal Gurský<sup>3</sup>, and Troels Skrydstrup<sup>1,2\*</sup>

<sup>1</sup>Carbon Dioxide Activation Center (CADIAC), Interdisciplinary Nanoscience Center (iNANO), Department of Chemistry, Aarhus University, 8000 Aarhus C, Denmark.

<sup>2</sup>Novo Nordisk Foundation CO<sub>2</sub> Research Center (CORC), Aarhus University, 8000 Aarhus, Denmark.

<sup>3</sup>Institute of Organic Chemistry, Catalysis and Petrochemistry, Slovak University of Technology, Bratislava, Slovak Republic.

<sup>‡</sup>These authors contributed equally.

\*Corresponding authors. Email: [bonde@inano.au.dk](mailto:bonde@inano.au.dk), [gmbf@inano.au.dk](mailto:gmbf@inano.au.dk), [ts@chem.au.dk](mailto:ts@chem.au.dk)

### Contents

|                                                                 |     |
|-----------------------------------------------------------------|-----|
| General Considerations .....                                    | S1  |
| Continuous Flow Setup .....                                     | S2  |
| Ligand and Complex Abbreviations .....                          | S3  |
| Calibration of the Inline Gas Chromatography Instrument .....   | S4  |
| Calculation Example of Measured Inline GC Data .....            | S7  |
| Design of Experiments #1 .....                                  | S9  |
| Design of Experiments #2 .....                                  | S10 |
| General Procedure for Ru-MACHO <sup>R</sup> Complex Scope ..... | S11 |
| Representative Inline GC Screenshots .....                      | S26 |
| Experiment with Addition of Pd/C .....                          | S33 |
| Experiment using Ru-NP <sub>3</sub> .....                       | S34 |
| Upscaling Using Ru-MACHO <sup>Cy</sup> .....                    | S35 |
| Ligand and Complex Synthesis .....                              | S41 |
| References .....                                                | S61 |
| NMR Spectra .....                                               | S62 |

### General Considerations

All chemicals were purchased from Sigma-Aldrich, Doug Discovery, Tokyo Chemical Industry (TCI), or Strem, and were used as received without further purification. Unless otherwise stated, all non-aqueous reactions were performed in either oven-dried or flame-dried apparatus under an atmosphere of argon using dried solvents. Solvents used in the argon-filled glovebox were dried according to standard procedures and degassed with argon. Flash column chromatography (FCC) was carried out using silica gel (230-400 mesh particle size, 60 Å pore size) as stationary phase. Automated flash column chromatography (AFCC) was carried out with Interchim PuriFlash XS520Plus with 30 µm prepacked columns. All NMR spectra were recorded on a Bruker 400 MHz Ascend spectrometer. Chemical shifts in <sup>1</sup>H and <sup>13</sup>C NMR spectra are reported in ppm relative to the solvent residual peak stated. NMR spectra are reported as: chemical shift (peak multiplicity; *J*-coupling constant(s) in Hz; integration). Peak multiplicities are abbreviated as: s = singlet, bs = broad singlet, d = doublet, t = triplet, q = quartet, quin = quintet, sept = septet, and m = multiplet. GC of gaseous products were obtained with an SRI Multiple Gas Analyzer #5 equipped with both thermal conductivity detector (TCD) and flame ionisation detector (FID).

HRMS spectral analysis was measured with a Bruker Maxis Impact Spectrometer using electrospray ionisation (ESI).

## Continuous Flow Setup

All reported continuous flow experiments were performed on the apparatus shown in Figure S3.1. An in-house manufactured gas-tight GL-45 lid fitted with a NBR70 O-ring having four  $\frac{1}{4}$ -28 flat-bottom ports is mounted on a 20 mL GL-45-necked bottle containing the catalyst solution. The first port connects to the HPLC pump using PTFE (1/8" OD x 1.59 mm ID) tubing equipped with a 2  $\mu$ m stainless-steel filter to prevent particles from entering pump head. The filtered solution is then pumped through a stainless steel (1/16" OD x 1.00 mm ID) reaction loop (1.6 mL volume) embedded in an in-house made stainless steel heating block insulated with a vermiculite cap and aluminium foil. Following the reaction loop, the heated mixture of catalyst solution and gaseous products enter a cooling coil (1/16" OD vs 1.00 mm ID) set to 0 °C. A back-pressure regulator is inserted downstream from the cooling section to set the desired reaction pressure. After the back-pressure regulator, a PTFE (1/8" OD x 1.59 mm ID) tube connects to a Y-connector providing a constant stream of argon carrier gas set by an Alicat mass flow controller before the mixture re-enters the GL-45 bottle through the second port. The PTFE tube exits into the bottom of the GL-45 bottle to effectively function as a gas-liquid separator. A 1/8" PTFE (1/8" OD x 1.59 mm ID) tube placed in the headspace exits through the third port which is connected to a solvent trap (10 mL) cooled to -78 °C before being fed continuously into the SRI Multiple Gas Analyzer #5 apparatus for analysis. The fourth port is either capped or equipped with an inlet for the addition of solutions. Thus, the catalyst solution is continuously recirculated through the system (6.0 mL total volume) while generated gaseous products are analysed by the GC.

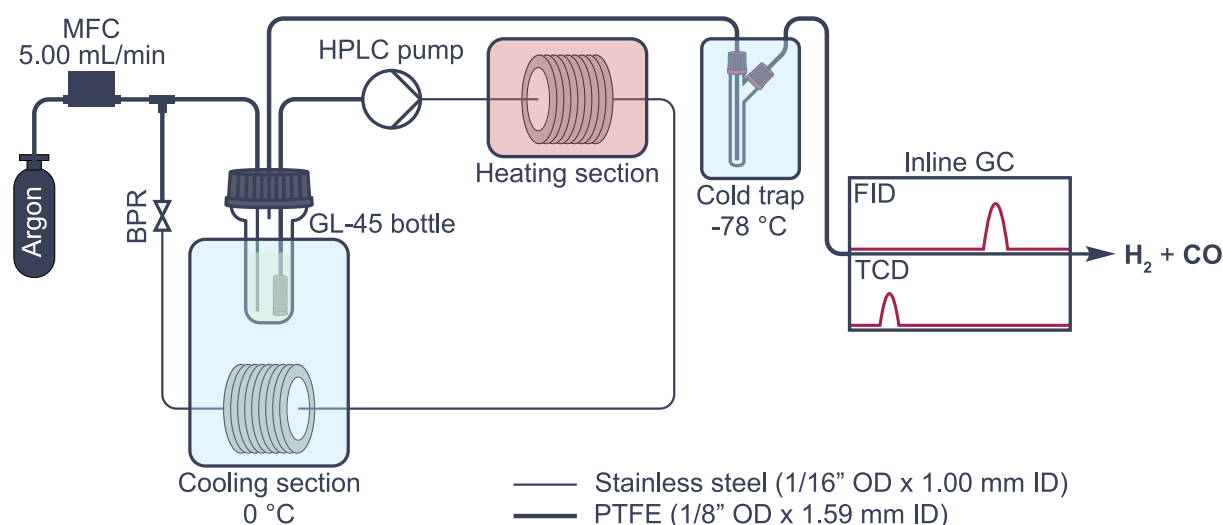

**Figure S1.** Schematic representation of the continuous flow setup.

## Ligand and Complex Abbreviations

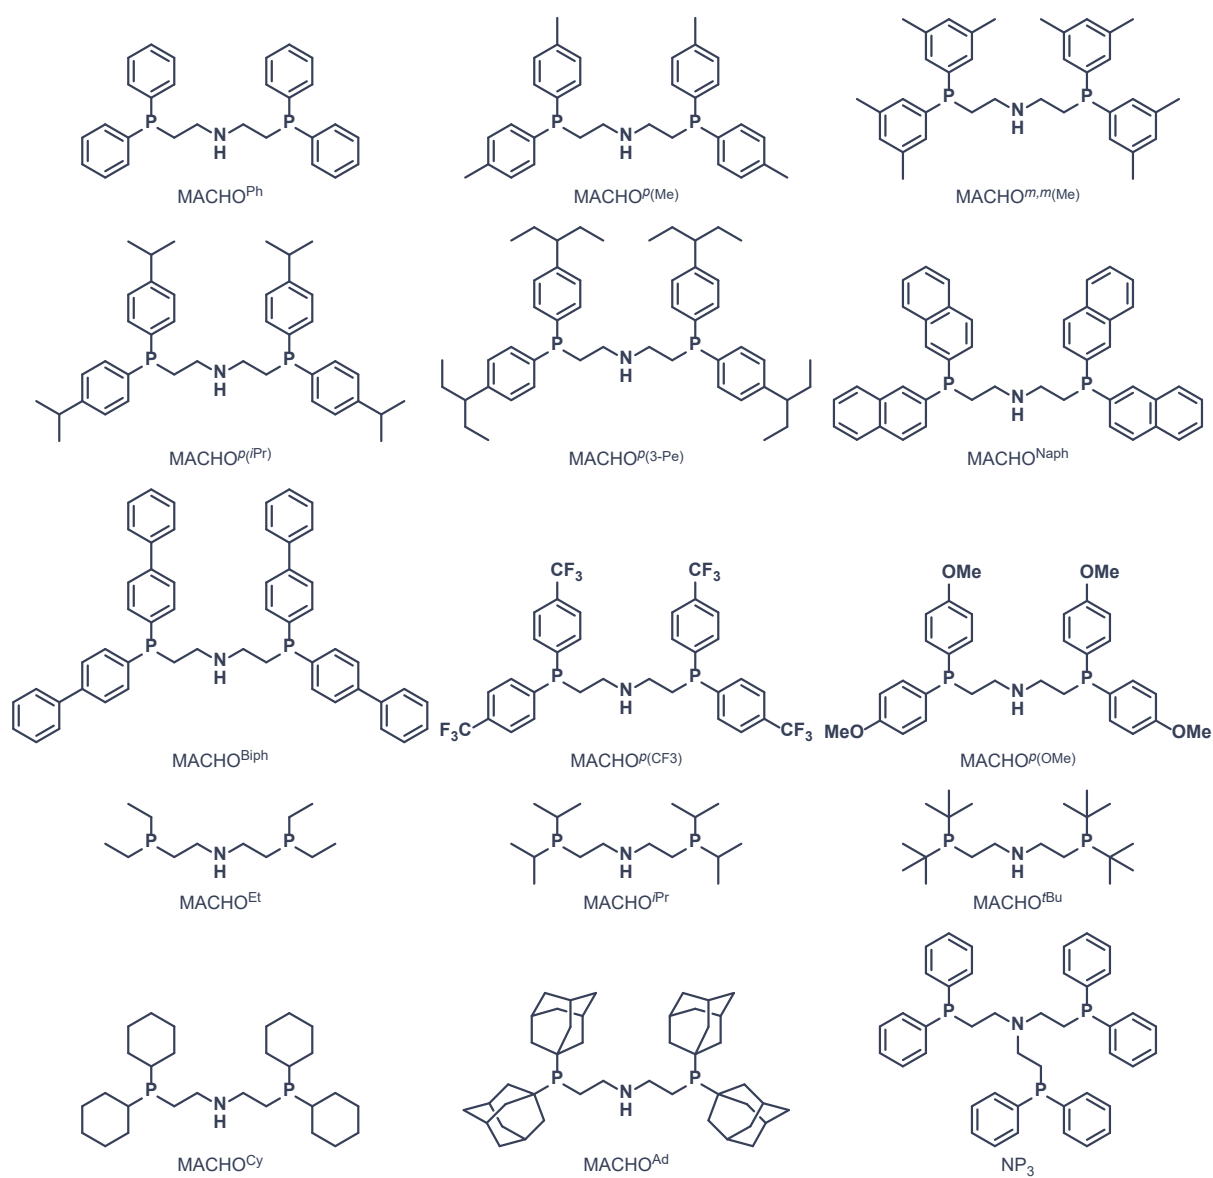

**Figure S2.** Overview of all MACHO<sup>R</sup> and tridentate ligands.

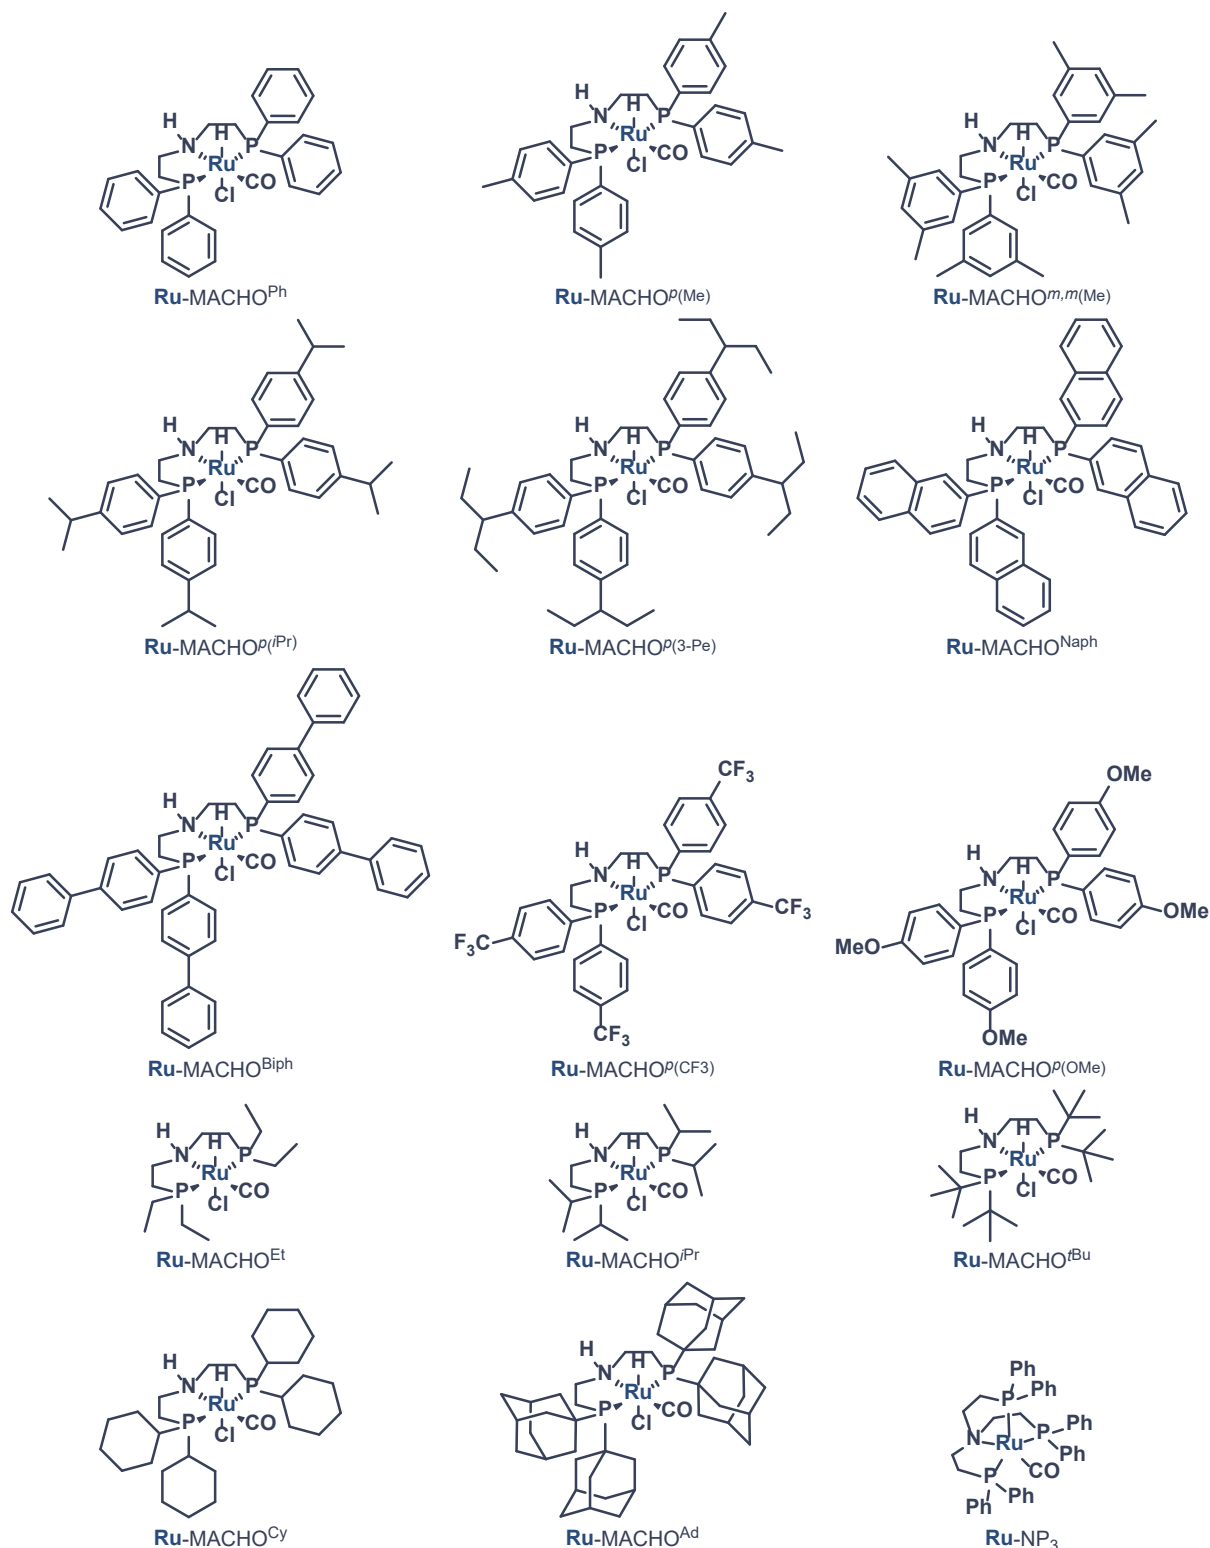

**Figure S3.** Overview of all Ru-MACHO<sup>R</sup> and tridentate complexes.

## Calibration of the Inline Gas Chromatography Instrument

Calibration of the inline GC instrument (SRI Multiple Gas Analyzer #5) was conducted using calibration gas cylinders for low concentrations and an in-house manufactured gas mixer for high concentrations. For low concentrations, the desired calibration gas cylinder was connected to the GC via a mass flow controller (5 mL/min). For high concentrations, pure gases from high-pressure cylinders were connected

to the gas mixer via mass flow controllers (5 mL/min total), which were thoroughly mixed by stirring prior to entering the GC. For each calibration point, an average of 5 entries were performed with maximum 4% deviation between lowest and highest sample. Hydrogen was measured using TCD, while carbon monoxide was measured on both TCD and FID for high and low concentrations, respectively.

**Table S1.** TCD calibration data for high amounts of hydrogen ( $\geq 60,000$  ppm).

| # | H <sub>2</sub> [ppm] | Areas |       |       |       |       | Avg. area | SD    | CV    |
|---|----------------------|-------|-------|-------|-------|-------|-----------|-------|-------|
| 1 | $2.0 \cdot 10^4$     | 1874  | 1878  | 1880  | 1882  | 1881  | 1879      | 2.83  | 0.151 |
| 2 | $6.0 \cdot 10^4$     | 5650  | 5636  | 5622  | 5615  | 5616  | 5628      | 13.39 | 0.238 |
| 3 | $10 \cdot 10^4$      | 8744  | 8757  | 8755  | 8746  | 8762  | 8751      | 5.59  | 0.064 |
| 4 | $15 \cdot 10^4$      | 12616 | 12738 | 12598 | 12577 | 12558 | 12617     | 63.35 | 0.502 |
| 5 | $25 \cdot 10^4$      | 20646 | 20645 | 20631 | 20625 | 20615 | 20632     | 11.86 | 0.057 |
| 6 | $35 \cdot 10^4$      | 27602 | 27602 | 27610 | 27608 | 27600 | 27604     | 3.88  | 0.014 |
| 7 | $46 \cdot 10^4$      | 34732 | 34774 | 34770 | 34788 | 34808 | 34774     | 25.02 | 0.072 |
| 8 | $60 \cdot 10^4$      | 43699 | 43730 | 43747 | 43746 | 43714 | 43727     | 18.56 | 0.042 |

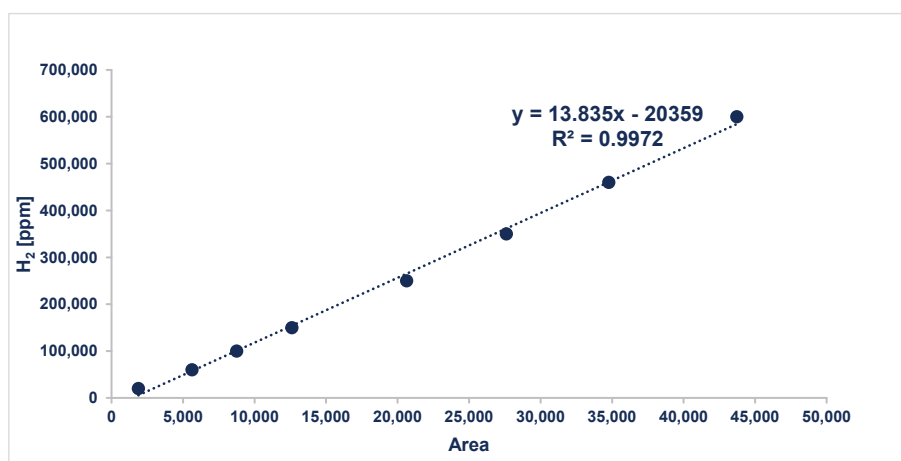

**Table S2.** TCD calibration data for low amounts of hydrogen ( $< 60,000$  ppm).

| # | H <sub>2</sub> [ppm] | Areas |      |      |      |      | Avg. area | SD    | CV     |
|---|----------------------|-------|------|------|------|------|-----------|-------|--------|
| 1 | 50                   | 3     | 3    | 4    | 3    | 4    | 3         | 0.49  | 14.409 |
| 2 | 100.1                | 8     | 8    | 8    | 8    | 8    | 8         | 0.00  | 0.000  |
| 3 | 1001                 | 92    | 93   | 91   | 93   | 93   | 92        | 0.80  | 0.866  |
| 4 | 5006                 | 477   | 477  | 479  | 467  | 469  | 474       | 4.83  | 1.020  |
| 5 | $9.83 \cdot 10^3$    | 947   | 951  | 951  | 950  | 943  | 948       | 3.07  | 0.324  |
| 6 | $2.0 \cdot 10^4$     | 1874  | 1878 | 1880 | 1882 | 1881 | 1879      | 2.83  | 0.151  |
| 7 | $6.0 \cdot 10^4$     | 5650  | 5636 | 5622 | 5615 | 5616 | 5628      | 13.39 | 0.238  |

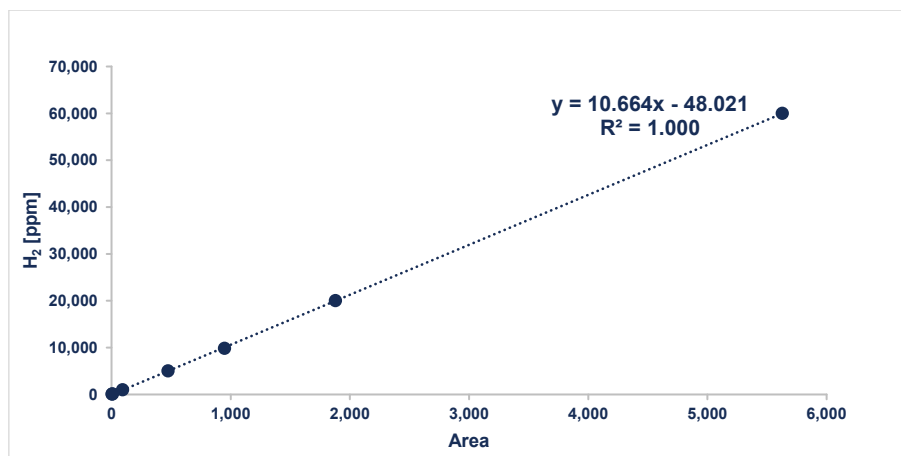

Table S3. TCD calibration data for high amounts of carbon monoxide ( $\geq 50,000$  ppm).

| # | CO [ppm]         | Areas |      |      |      |      | Avg. area | SD    | CV   |
|---|------------------|-------|------|------|------|------|-----------|-------|------|
| 1 | $2.0 \cdot 10^4$ | 190   | 186  | 184  | 184  | 183  | 185       | 2.50  | 1.35 |
| 2 | $6.0 \cdot 10^4$ | 557   | 560  | 560  | 562  | 564  | 561       | 2.33  | 0.42 |
| 3 | $10 \cdot 10^4$  | 979   | 977  | 978  | 979  | 977  | 978       | 0.89  | 0.09 |
| 4 | $17 \cdot 10^4$  | 1687  | 1691 | 1689 | 1690 | 1684 | 1688      | 2.48  | 0.15 |
| 5 | $25 \cdot 10^4$  | 2402  | 2404 | 2407 | 2411 | 2407 | 2406      | 3.06  | 0.13 |
| 6 | $35 \cdot 10^4$  | 3343  | 3351 | 3318 | 3333 | 3483 | 3366      | 59.72 | 1.77 |
| 7 | $46 \cdot 10^4$  | 4406  | 4390 | 4407 | 4416 | 4399 | 4404      | 8.69  | 0.20 |
| 8 | $64 \cdot 10^4$  | 6257  | 6277 | 6267 | 6276 | 6279 | 6271      | 8.21  | 0.13 |
| 9 | $75 \cdot 10^4$  | 7363  | 7355 | 7362 | 7371 | 7372 | 7365      | 6.28  | 0.09 |

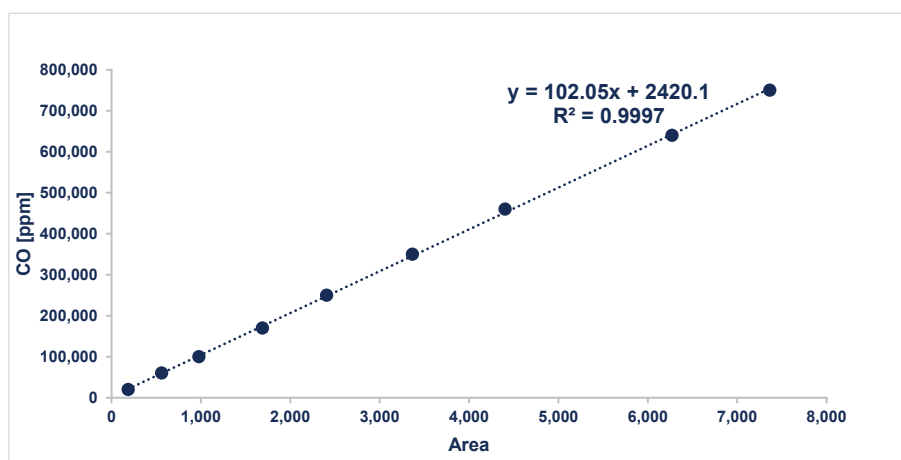

Table S4. FID calibration data for low amounts of carbon monoxide ( $< 50,000$  ppm).

| # | CO [ppm]         | Areas |      |      |      |      | Avg. area | SD    | CV   |
|---|------------------|-------|------|------|------|------|-----------|-------|------|
| 1 | 100.3            | 28    | 28   | 28   | 27   | 28   | 28        | 0.40  | 1.44 |
| 2 | 1007             | 300   | 289  | 292  | 291  | 290  | 292       | 3.93  | 1.34 |
| 3 | 5003             | 1457  | 1458 | 1455 | 1454 | 1464 | 1458      | 3.50  | 0.24 |
| 4 | 10020            | 2954  | 2966 | 2988 | 2987 | 2980 | 2975      | 13.11 | 0.44 |
| 5 | $2.0 \cdot 10^4$ | 5386  | 5300 | 5268 | 5264 | 5248 | 5293      | 49.37 | 0.93 |

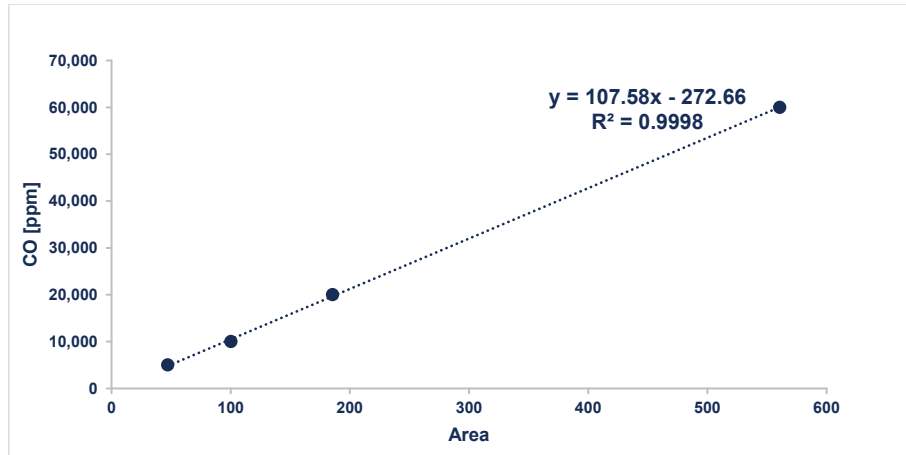

### Calculation Example of Measured Inline GC Data

The concentration,  $C$ , of hydrogen and carbon monoxide is determined using the following calibration equations:

$$\text{For } \geq 60,000 \text{ ppm H}_2 \text{ (TCD): } C_{\text{H}_2} = 13.835 \cdot \text{Area}_{\text{H}_2} - 20359$$

$$\text{For } < 60,000 \text{ ppm H}_2 \text{ (TCD): } C_{\text{H}_2} = 10.664 \cdot \text{Area}_{\text{H}_2} - 48.021$$

$$\text{For } \geq 50,000 \text{ ppm CO (TCD): } C_{\text{CO}} = 102.05 \cdot \text{Area}_{\text{CO}} + 2420.1$$

$$\text{For } < 50,000 \text{ ppm CO (FID): } C_{\text{CO}} = 3.7401 \cdot \text{Area}_{\text{CO}} - 288.63$$

The total volumetric flow rate of gases into the inline GC,  $V_{tot}$ , is given by the sum of flow rates: the argon carrier gas,  $\dot{V}_{Ar}$ , generated hydrogen,  $\dot{V}_{H_2}$ , and generated carbon monoxide,  $\dot{V}_{CO}$ , and is expressed as:

$$V_{tot} = \dot{V}_{Ar} + \dot{V}_{H_2} + \dot{V}_{CO}$$

The volumetric contributions of generated hydrogen and carbon monoxide are defined as:

$$\dot{V}_{H_2} = V_{tot} \cdot \frac{C_{H_2}}{10^6}$$

$$\dot{V}_{CO} = V_{tot} \cdot \frac{C_{CO}}{10^6}$$

Substituting these expressions into the total flow equation yields:

$$V_{tot} = \dot{V}_{Ar} + V_{tot} \cdot \frac{C_{H_2}}{10^6} + V_{tot} \cdot \frac{C_{CO}}{10^6}$$

And rearranging for  $V_{tot}$ :

$$V_{tot} = \frac{\dot{V}_{Ar}}{1 - \frac{C_{H_2}}{10^6} - \frac{C_{CO}}{10^6}}$$

The molar quantities of hydrogen and carbon monoxide generated over a 20-minute interval are then calculated as:

$$n_{H_2} = \frac{V_{tot} \cdot 20 \text{ min} \cdot \frac{C_{H_2}}{10^6}}{V_m}$$

$$n_{\text{CO}} = \frac{V_{\text{tot}} \cdot 20 \text{ min} \cdot \frac{C_{\text{CO}}}{10^6}}{V_m}$$

Given that the molar volume,  $V_m$ , is determined using the ideal gas law:

$$V_m = \frac{R \cdot T}{P} = \frac{8.206 \cdot 10^{-2} \frac{\text{L} \cdot \text{atm}}{\text{K} \cdot \text{mol}} \cdot 293 \text{ K}}{1.00 \text{ atm}} = 24.04 \frac{\text{L}}{\text{mol}}$$

These expressions enable the quantification of hydrogen and carbon monoxide production under the given experimental conditions.

**Table S5. General data example.** Using Ru-MACHO<sup>Ph</sup> (20  $\mu\text{mol}$ ), *t*BuOK (200  $\mu\text{mol}$ ), methanol (20 mL), flow rate (2.50 mL/min), BPR (100 psi), and 150 °C for 3 hours.

| Time [min] | Area           |      | Concentration [ppm] |        | Total flow [mL/min] |
|------------|----------------|------|---------------------|--------|---------------------|
|            | H <sub>2</sub> | CO   | H <sub>2</sub>      | CO     |                     |
| 0          | 47095          | 1580 | 631200              | 163659 | 24.37               |
| 20         | 39214          | 2489 | 522167              | 256423 | 22.58               |
| 40         | 37181          | 2427 | 494040              | 250095 | 19.54               |
| 60         | 35713          | 2379 | 473730              | 245197 | 17.79               |
| 80         | 34796          | 2235 | 461044              | 230502 | 16.21               |
| 100        | 33362          | 2165 | 441204              | 223358 | 14.91               |
| 120        | 33343          | 2056 | 440941              | 212235 | 14.42               |
| 140        | 31644          | 2007 | 417436              | 207234 | 13.32               |
| 160        | 31389          | 2001 | 413908              | 206622 | 13.18               |
| 180        | 29350          | 1877 | 385698              | 193968 | 11.90               |

Table S5. Continued.

| Time [min] | $n$ [mmol]     |      | Ratio (H <sub>2</sub> /CO) | TOF            |     | Accumulated $n$ [mmol] |       |
|------------|----------------|------|----------------------------|----------------|-----|------------------------|-------|
|            | H <sub>2</sub> | CO   |                            | H <sub>2</sub> | CO  | H <sub>2</sub>         | CO    |
| 0          | 12.80          | 3.32 | 3.86                       | 1920           | 498 | 12.80                  | 3.32  |
| 20         | 9.81           | 4.82 | 2.04                       | 1471           | 723 | 22.61                  | 8.14  |
| 40         | 8.03           | 4.07 | 1.98                       | 1205           | 610 | 30.64                  | 12.20 |
| 60         | 7.01           | 3.63 | 1.93                       | 1052           | 544 | 37.65                  | 15.83 |
| 80         | 6.22           | 3.11 | 2.00                       | 933            | 466 | 43.86                  | 18.94 |
| 100        | 5.47           | 2.77 | 1.98                       | 821            | 415 | 49.33                  | 21.71 |
| 120        | 5.29           | 2.55 | 2.08                       | 793            | 382 | 54.62                  | 24.25 |
| 140        | 4.63           | 2.30 | 2.01                       | 694            | 344 | 59.25                  | 26.55 |
| 160        | 4.54           | 2.26 | 2.00                       | 680            | 340 | 63.78                  | 28.81 |
| 180        | 3.82           | 1.92 | 1.99                       | 572            | 288 | 67.60                  | 30.73 |

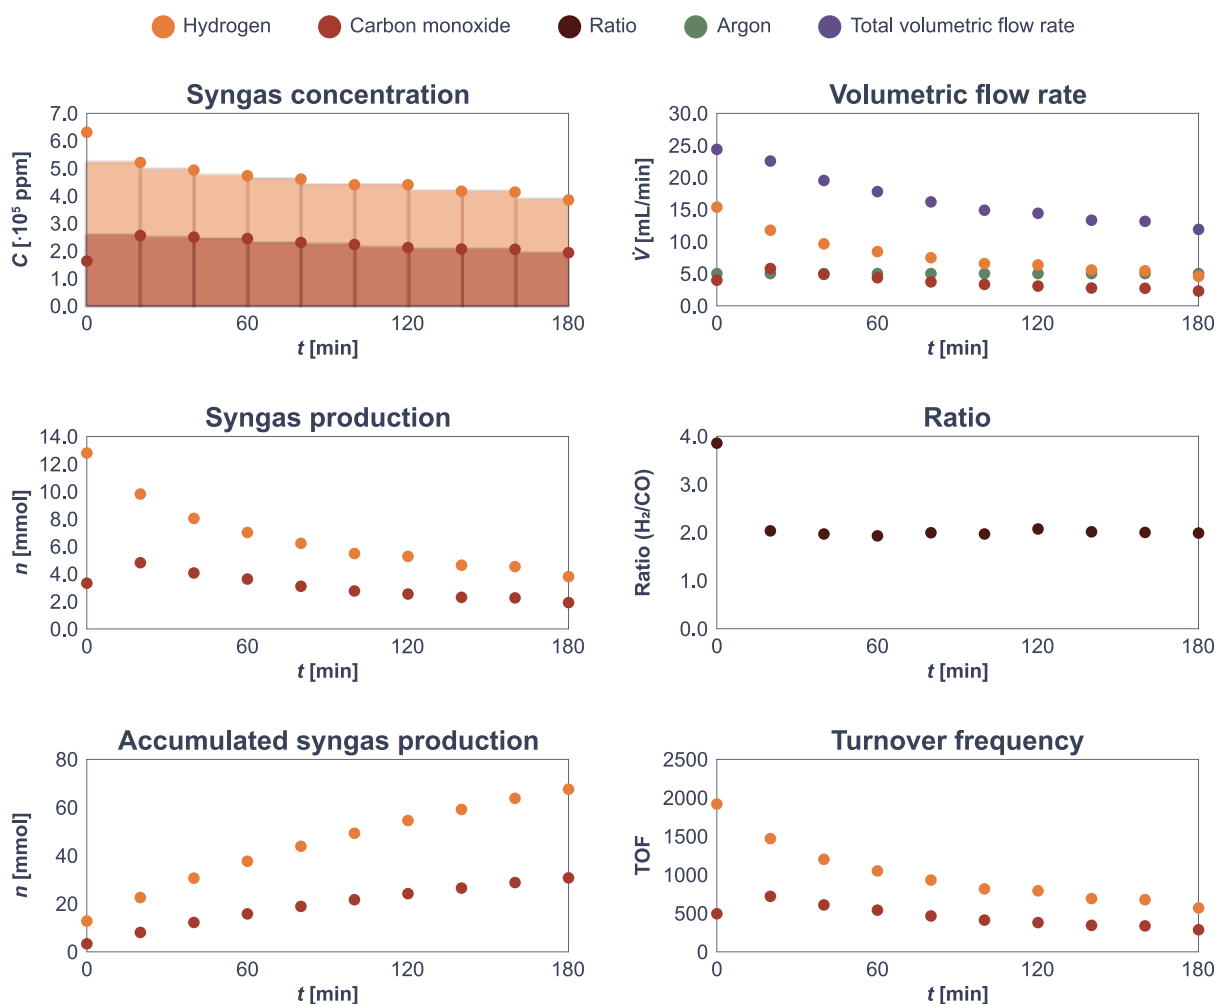

**Figure S4. General data example.** Using Ru-MACHO<sup>Ph</sup> (20  $\mu$ mol), *t*BuOK (200  $\mu$ mol), methanol (20 mL), flow rate (2.50 mL/min), BPR (100 psi), and 150  $^{\circ}$ C for 3 hours.

## Design of Experiments #1

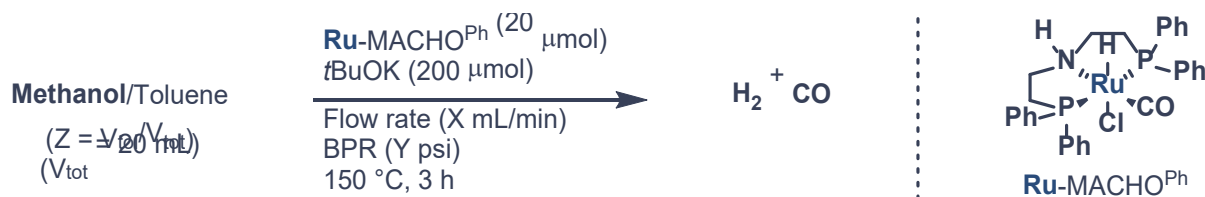

Inside a glovebox, a 20 mL GL-45 bottle (bottle A) was charged with Ru-MACHO<sup>Ph</sup> (12.1 mg, 20  $\mu$ mol), methanol and/or toluene (14 mL), and *t*BuOK (22.4 mg, 200  $\mu$ mol). In addition, a 100 mL GL-45 bottle (bottle B) was charged with methanol (50 mL). Both bottles were capped and taken outside the glovebox.

Outside the glovebox, the back-pressure regulator was exchanged for the desired pressure (Y psi), and the flow system described above (Continuous Flow Setup) was flushed with methanol (100 mL) into a waste container under air. The gas-tight GL-45 lid was then transferred to bottle B, and the flow system was flushed again into a waste container by disconnecting the returning line at the Y-connection, while being extensively degassed using argon. After flushing methanol (40 mL), the returning line was reconnected to the Y-connection, restoring the closed-loop flow system. Once flushing was complete and the flow system filled with methanol (6 mL), the gas-tight GL-45 lid was transferred to bottle A, and the flow system was operated for 5 minutes at a flow rate of 10.00 mL/min. After 5 minutes, the flow rate

(X mL/min) was adjusted to the desired value, the mass flow controller changed to 5.00 mL/min, and the inline GC connected. Following an additional 5 minutes of operation under the desired conditions, the inline GC was started, and the composition of the produced syngas was measured at 20-minute intervals.

**Table S6.** Summary of results for the first DoE.

| #  | Flow rate<br>[X mL/min] | BPR<br>[Y psi] | Dilution<br>[Z = $V_{\text{tot}}/V_{\text{tot}}$ ] | n [mmol]       |       | Ratio<br>(H <sub>2</sub> /CO) |
|----|-------------------------|----------------|----------------------------------------------------|----------------|-------|-------------------------------|
|    |                         |                |                                                    | H <sub>2</sub> | CO    |                               |
| 1  | 2.50                    | 500            | 0.50                                               | 7.31           | 3.10  | 2.35                          |
| 2  | 1.00                    | 100            | 0.50                                               | 59.31          | 28.31 | 2.09                          |
| 3  | 1.00                    | 250            | 0.70                                               | 4.95           | 1.92  | 2.57                          |
| 4  | 2.50                    | 500            | 0.20                                               | 3.80           | 1.57  | 2.42                          |
| 5  | 4.00                    | 250            | 0.20                                               | 4.61           | 1.66  | 2.77                          |
| 6  | 2.50                    | 1000           | 0.20                                               | 3.27           | 1.18  | 2.77                          |
| 7  | 2.50                    | 100            | 0.00                                               | 54.80          | 27.41 | 2.00                          |
| 8  | 1.00                    | 1000           | 0.00                                               | 1.56           | 0.56  | 2.80                          |
| 9  | 4.00                    | 1000           | 0.70                                               | 8.21           | 2.34  | 3.52                          |
| 10 | 1.00                    | 500            | 0.20                                               | 2.45           | 0.94  | 2.62                          |
| 11 | 0.50                    | 250            | 0.00                                               | 1.18           | 0.32  | 3.63                          |
| 12 | 2.50                    | 500            | 0.50                                               | 5.76           | 1.86  | 3.10                          |
| 13 | 4.00                    | 1000           | 0.00                                               | 2.81           | 1.20  | 2.35                          |
| 14 | 0.50                    | 1000           | 0.50                                               | 2.08           | 0.51  | 4.06                          |
| 15 | 1.00                    | 1000           | 0.70                                               | 4.75           | 1.88  | 2.52                          |
| 16 | 4.00                    | 100            | 0.70                                               | 34.15          | 13.64 | 2.50                          |

## Design of Experiments #2

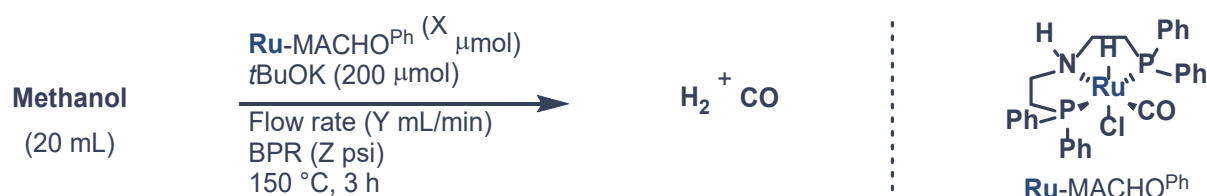

Inside a glovebox, a catalyst stock solution of Ru-MACHO<sup>Ph</sup> in methanol (0.50 mL / 1.0  $\mu\text{mol}$  catalyst) was prepared by stirring until a homogenous suspension was obtained. To a 20 mL GL-45 bottle (bottle A) charged with *t*BuOK (22.4 mg, 200  $\mu\text{mol}$ ), was added Ru-MACHO<sup>Ph</sup> stock solution (X  $\mu\text{mol}$ ) via syringe, followed by dilution with methanol to a total of volume of 14 mL. In addition, a 100 mL GL-45 bottle (bottle B) was charged with methanol (50 mL). Both bottles were capped and taken outside the glovebox.

Outside the glovebox, the back-pressure regulator was exchanged for the desired pressure (Z psi), the flow system described above (Continuous Flow Setup) was flushed with methanol (100 mL) into a waste container under air. The gas-tight GL-45 lid was then transferred to bottle B, and the flow system was flushed again into a waste container by disconnecting the returning line at the Y-connection, while being extensively degassed using argon. After flushing methanol (40 mL), the returning line was reconnected to the Y-connection, restoring the closed-loop flow system. Once flushing was complete and the flow system filled with methanol (6 mL), the gas-tight GL-45 lid was transferred to bottle A, and the flow system was operated for 5 minutes at a flow rate of 10.00 mL/min. After 5 minutes, the flow rate (Y mL/min) was adjusted to the desired value, the mass flow controller changed to 5.00 mL/min, and the

inline GC connected. Following an additional 5 minutes of operation under the desired conditions, the inline GC was started, and the composition of the produced syngas was measured at 20-minute intervals.

**Table S7.** Summary of results for the second DoE.

| #  | Catalyst loading<br>[X $\mu\text{mol}$ ] | Flow rate<br>[Y mL/min] | BPR<br>[Z psi] | <i>n</i> [mmol] |       | Ratio<br>(H <sub>2</sub> /CO) |
|----|------------------------------------------|-------------------------|----------------|-----------------|-------|-------------------------------|
|    |                                          |                         |                | H <sub>2</sub>  | CO    |                               |
| 1  | 2.0                                      | 1.00                    | 100            | 29.94           | 14.82 | 2.02                          |
| 2  | 2.0                                      | 4.00                    | 100            | 30.24           | 15.02 | 2.01                          |
| 3  | 2.0                                      | 2.50                    | 75             | 32.44           | 16.14 | 2.01                          |
| 4  | 20                                       | 2.50                    | 100            | 67.29           | 34.52 | 1.95                          |
| 5  | 2.0                                      | 2.50                    | 40             | 11.94           | 5.96  | 2.00                          |
| 6  | 0.20                                     | 2.50                    | 75             | 8.93            | 4.30  | 2.08                          |
| 7  | 2.0                                      | 4.00                    | 75             | 29.76           | 14.63 | 2.03                          |
| 8  | 0.20                                     | 1.00                    | 100            | 7.58            | 3.65  | 2.08                          |
| 9  | 0.20                                     | 4.00                    | 100            | 8.66            | 4.02  | 2.15                          |
| 10 | 0.20                                     | 4.00                    | 40             | 2.69            | 1.44  | 1.87                          |
| 11 | 20                                       | 1.00                    | 40             | 11.73           | 6.35  | 1.85                          |
| 12 | 0.20                                     | 2.50                    | 100            | 8.86            | 4.33  | 2.05                          |
| 13 | 20                                       | 4.00                    | 40             | 16.26           | 8.23  | 1.98                          |
| 14 | 2.0                                      | 1.00                    | 75             | 27.04           | 13.60 | 1.99                          |
| 15 | 2.0                                      | 2.50                    | 40             | 9.98            | 4.97  | 2.01                          |
| 16 | 0.20                                     | 1.00                    | 40             | 2.94            | 1.47  | 2.00                          |

### General Procedure for Ru-MACHO<sup>R</sup> Complex Scope

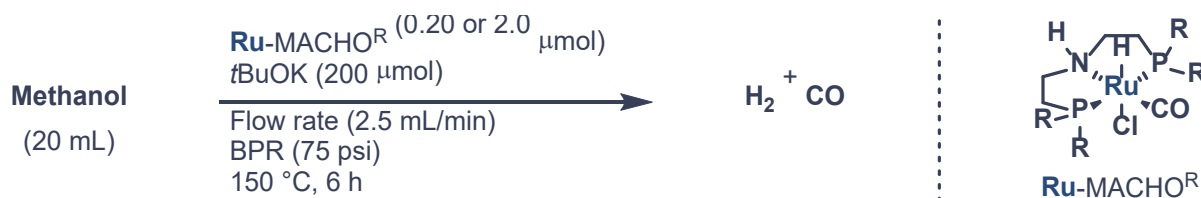

Inside a glovebox, a catalyst stock solution of Ru-MACHO-derivative in methanol (0.50 mL / 1.0  $\mu\text{mol}$  catalyst) was prepared by stirring until a homogenous solution or suspension was obtained. To a 20 mL GL-45 bottle (bottle A) charged with *t*BuOK (22.4 mg, 200  $\mu\text{mol}$ ), was added Ru-MACHO-derivative stock solution (2.0 or 0.20  $\mu\text{mol}$ ) via syringe, followed by dilution with methanol to a total of volume of 14 mL. In addition, a 100 mL GL-45 bottle (bottle B) was charged with methanol (50 mL). Both bottles were capped and taken outside the glovebox.

Outside the glovebox, the flow system described above (Continuous Flow Setup) equipped with a back-pressure regulator (75 psi), was flushed with methanol (100 mL) into a waste container under air. The gas-tight GL-45 lid was then transferred to bottle B, and the flow system was flushed again into a waste container by disconnecting the returning line at the Y-connection, while being extensively degassed using argon. After flushing methanol (40 mL), the returning line was reconnected to the Y-connection, restoring the closed-loop flow system. Once flushing was complete and the flow system filled with methanol (6 mL), the gas-tight GL-45 lid was transferred to bottle A, and the flow system was operated for 5 minutes at a flow rate of 10.00 mL/min. After 5 minutes, the flow rate was adjusted to 2.50 mL/min, the mass flow controller changed to 5.00 mL/min, and the inline GC connected. Following an additional 5 minutes of operation under the desired conditions, the inline GC was started, and the composition of the produced syngas was measured at 20-minute intervals.

**Table S8.** Summary of results for Ru-MACHO<sup>R</sup> (2.0 μmol). All entries are given as an average of two.

| Time<br>[min] | Ru-MACHO <sup>Ph</sup> |      |                               | Ru-MACHO <sup>p(Me)</sup> |      |                               |
|---------------|------------------------|------|-------------------------------|---------------------------|------|-------------------------------|
|               | TOF [h <sup>-1</sup> ] |      | Ratio<br>(H <sub>2</sub> /CO) | TOF [h <sup>-1</sup> ]    |      | Ratio<br>(H <sub>2</sub> /CO) |
|               | H <sub>2</sub>         | CO   |                               | H <sub>2</sub>            | CO   |                               |
| 0             | 9693                   | 2698 | 3.60                          | 6888                      | 1749 | 3.93                          |
| 20            | 9198                   | 4490 | 2.06                          | 6834                      | 3195 | 2.14                          |
| 40            | 7856                   | 3953 | 1.99                          | 6370                      | 3140 | 2.03                          |
| 60            | 6850                   | 3462 | 1.98                          | 5899                      | 2912 | 2.03                          |
| 80            | 6276                   | 3181 | 1.97                          | 5382                      | 2669 | 2.02                          |
| 100           | 5400                   | 2726 | 1.98                          | 5190                      | 2592 | 2.00                          |
| 120           | 4911                   | 2507 | 1.96                          | 4958                      | 2464 | 2.01                          |
| 140           | 4153                   | 2088 | 1.99                          | 4342                      | 2147 | 2.02                          |
| 160           | 3803                   | 1925 | 1.98                          | 4024                      | 1992 | 2.02                          |
| 180           | 3165                   | 1582 | 2.00                          | 3755                      | 1860 | 2.02                          |
| 200           | 2942                   | 1493 | 1.97                          | 3404                      | 1688 | 2.02                          |
| 220           | 2459                   | 1237 | 1.99                          | 3214                      | 1594 | 2.02                          |
| 240           | 2167                   | 1087 | 1.99                          | 3017                      | 1494 | 2.02                          |
| 260           | 1954                   | 989  | 1.98                          | 2710                      | 1331 | 2.04                          |
| 280           | 1694                   | 861  | 1.97                          | 2441                      | 1196 | 2.04                          |
| 300           | 1408                   | 709  | 1.99                          | 2265                      | 1119 | 2.03                          |
| 320           | 1254                   | 636  | 1.97                          | 2100                      | 1046 | 2.01                          |
| 340           | 1113                   | 568  | 1.96                          | 1952                      | 965  | 2.02                          |
| 360           | 1003                   | 512  | 1.96                          | 1753                      | 867  | 2.02                          |

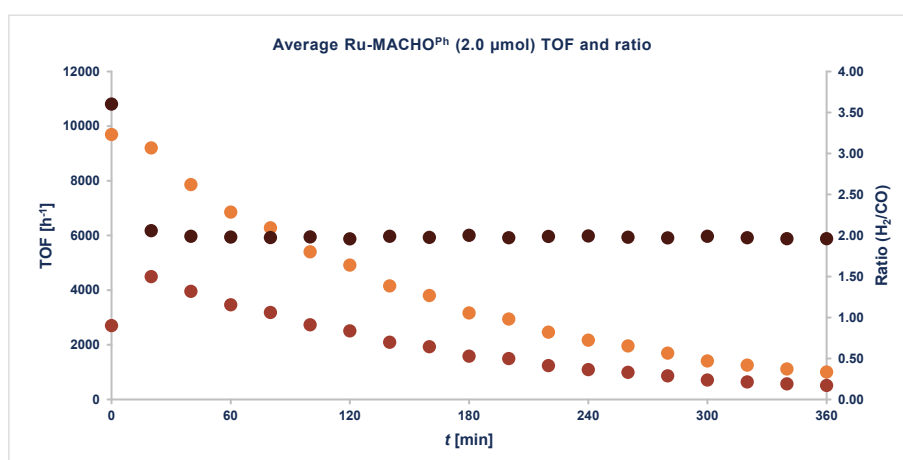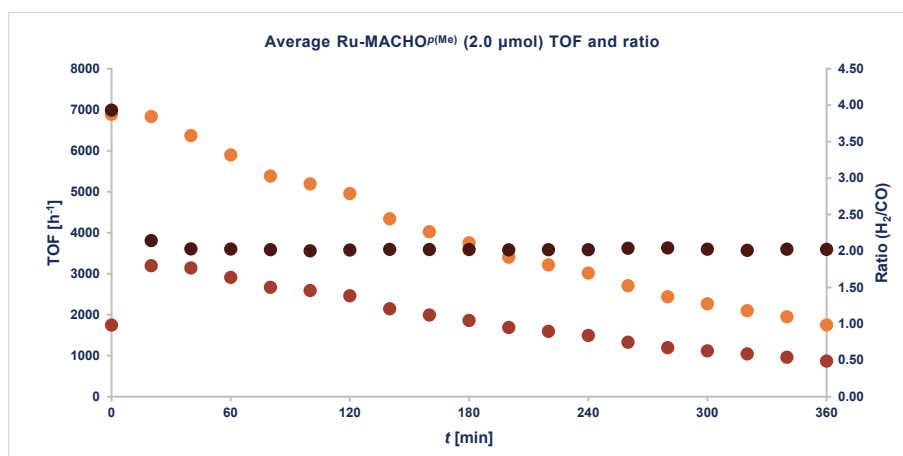

**Table S8.** Summary of results for Ru-MACHO<sup>R</sup> (2.0 μmol). *Continued.*

| Time<br>[min] | Ru-MACHO <sup>m,m(Me)</sup> |      |                               | Ru-MACHO <sup>p(iPr)</sup> |      |                               |
|---------------|-----------------------------|------|-------------------------------|----------------------------|------|-------------------------------|
|               | TOF [h <sup>-1</sup> ]      |      | Ratio<br>(H <sub>2</sub> /CO) | TOF [h <sup>-1</sup> ]     |      | Ratio<br>(H <sub>2</sub> /CO) |
|               | H <sub>2</sub>              | CO   |                               | H <sub>2</sub>             | CO   |                               |
| 0             | 6570                        | 1706 | 3.86                          | 6587                       | 1743 | 3.84                          |
| 20            | 6067                        | 2818 | 2.15                          | 6841                       | 3288 | 2.10                          |
| 40            | 5938                        | 2877 | 2.06                          | 6177                       | 3055 | 2.03                          |
| 60            | 5622                        | 2774 | 2.03                          | 5519                       | 2753 | 2.01                          |
| 80            | 5286                        | 2589 | 2.04                          | 5018                       | 2494 | 2.02                          |
| 100           | 5065                        | 2489 | 2.04                          | 4395                       | 2182 | 2.02                          |
| 120           | 4776                        | 2340 | 2.04                          | 4280                       | 2143 | 2.00                          |
| 140           | 4350                        | 2135 | 2.04                          | 3580                       | 1776 | 2.02                          |
| 160           | 4099                        | 2015 | 2.03                          | 3191                       | 1581 | 2.02                          |
| 180           | 3864                        | 1900 | 2.03                          | 2933                       | 1450 | 2.02                          |
| 200           | 3626                        | 1778 | 2.04                          | 2698                       | 1326 | 2.04                          |
| 220           | 3499                        | 1709 | 2.05                          | 2417                       | 1203 | 2.01                          |
| 240           | 3223                        | 1574 | 2.05                          | 2226                       | 1099 | 2.02                          |
| 260           | 2985                        | 1467 | 2.03                          | 2019                       | 1003 | 2.01                          |
| 280           | 2741                        | 1338 | 2.05                          | 1795                       | 884  | 2.03                          |
| 300           | 2681                        | 1317 | 2.04                          | 1598                       | 792  | 2.02                          |
| 320           | 2509                        | 1233 | 2.04                          | 1509                       | 757  | 1.99                          |
| 340           | 2297                        | 1124 | 2.04                          | 1382                       | 689  | 2.01                          |
| 360           | 2154                        | 1058 | 2.04                          | 1235                       | 618  | 2.00                          |

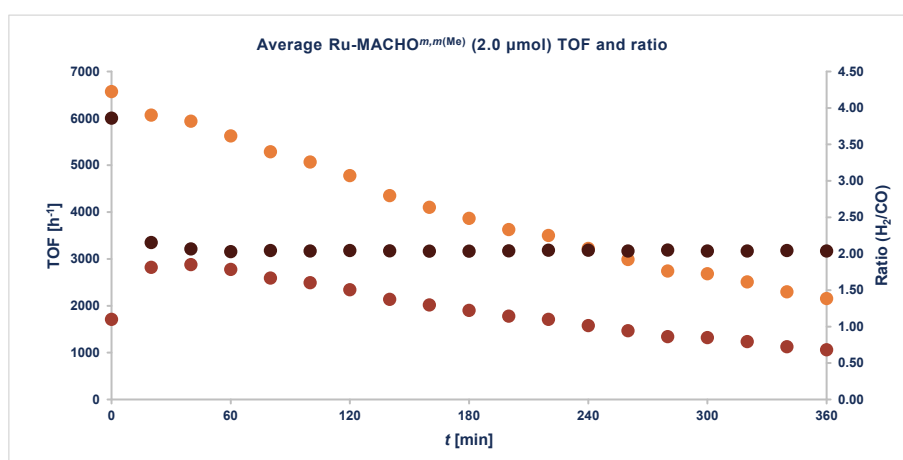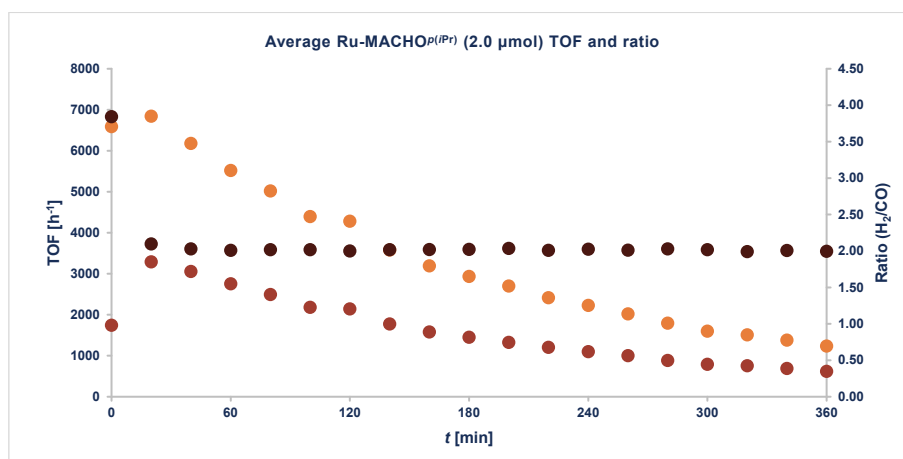

**Table S8.** Summary of results for Ru-MACHO<sup>R</sup> (2.0 μmol). *Continued.*

| Time<br>[min] | Ru-MACHO <sup>p(3-Pe)</sup> |      |                               | Ru-MACHO <sup>Naph</sup> |      |                               |
|---------------|-----------------------------|------|-------------------------------|--------------------------|------|-------------------------------|
|               | TOF [h <sup>-1</sup> ]      |      | Ratio<br>(H <sub>2</sub> /CO) | TOF [h <sup>-1</sup> ]   |      | Ratio<br>(H <sub>2</sub> /CO) |
|               | H <sub>2</sub>              | CO   |                               | H <sub>2</sub>           | CO   |                               |
| 0             | 5858                        | 790  | 7.47                          | 3014                     | 538  | 5.64                          |
| 20            | 7435                        | 2720 | 2.72                          | 4599                     | 2062 | 2.23                          |
| 40            | 6252                        | 2849 | 2.20                          | 3531                     | 1788 | 1.98                          |
| 60            | 5156                        | 2566 | 2.02                          | 3006                     | 1538 | 1.96                          |
| 80            | 4548                        | 2346 | 1.94                          | 2541                     | 1292 | 1.96                          |
| 100           | 4650                        | 2401 | 1.95                          | 2233                     | 1116 | 2.00                          |
| 120           | 3810                        | 1957 | 1.95                          | 1966                     | 994  | 1.98                          |
| 140           | 3503                        | 1811 | 1.94                          | 1784                     | 880  | 2.03                          |
| 160           | 3386                        | 1715 | 1.98                          | 1617                     | 825  | 1.96                          |
| 180           | 3140                        | 1590 | 1.98                          | 1506                     | 733  | 2.06                          |
| 200           | 2833                        | 1438 | 1.97                          | 1390                     | 679  | 2.05                          |
| 220           | 2653                        | 1370 | 1.93                          | 1309                     | 642  | 2.04                          |
| 240           | 2544                        | 1283 | 1.98                          | 1243                     | 593  | 2.10                          |
| 260           | 2231                        | 1143 | 1.95                          | 1183                     | 585  | 2.02                          |
| 280           | 2030                        | 1049 | 1.93                          | 1137                     | 554  | 2.05                          |
| 300           | 1898                        | 975  | 1.95                          | 1078                     | 545  | 1.98                          |
| 320           | 1771                        | 903  | 1.96                          | 1024                     | 504  | 2.03                          |
| 340           | 1615                        | 838  | 1.93                          | 993                      | 492  | 2.02                          |
| 360           | 1491                        | 771  | 1.93                          | 944                      | 473  | 2.00                          |

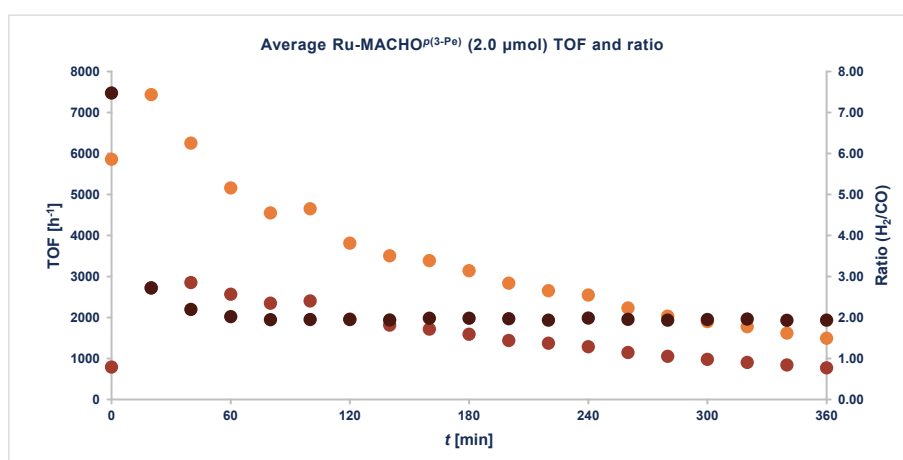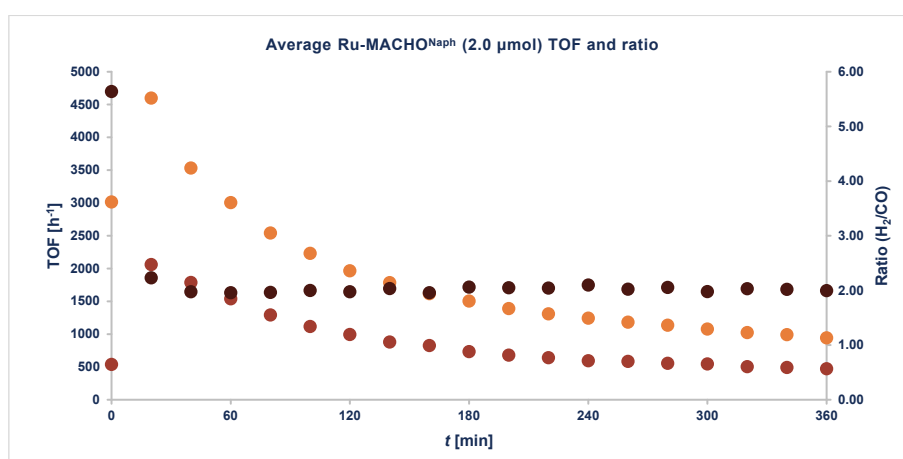

**Table S8.** Summary of results for Ru-MACHO<sup>R</sup> (2.0 μmol). *Continued.*

| Time<br>[min] | Ru-MACHO <sup>Biph</sup> |      |                               | Ru-MACHO <sup>P(CF3)</sup> |      |                               |
|---------------|--------------------------|------|-------------------------------|----------------------------|------|-------------------------------|
|               | TOF [h <sup>-1</sup> ]   |      | Ratio<br>(H <sub>2</sub> /CO) | TOF [h <sup>-1</sup> ]     |      | Ratio<br>(H <sub>2</sub> /CO) |
|               | H <sub>2</sub>           | CO   |                               | H <sub>2</sub>             | CO   |                               |
| 0             | 3612                     | 942  | 3.85                          | 2470                       | 599  | 4.12                          |
| 20            | 5235                     | 2409 | 2.17                          | 3662                       | 1624 | 2.25                          |
| 40            | 3937                     | 2016 | 1.95                          | 3473                       | 1641 | 2.12                          |
| 60            | 3216                     | 1643 | 1.96                          | 3342                       | 1617 | 2.07                          |
| 80            | 2685                     | 1374 | 1.95                          | 3192                       | 1555 | 2.05                          |
| 100           | 2287                     | 1164 | 1.97                          | 3055                       | 1452 | 2.10                          |
| 120           | 1994                     | 994  | 2.01                          | 2906                       | 1400 | 2.08                          |
| 140           | 1763                     | 888  | 1.98                          | 2745                       | 1322 | 2.08                          |
| 160           | 1568                     | 782  | 2.01                          | 2585                       | 1270 | 2.04                          |
| 180           | 1409                     | 716  | 1.97                          | 2428                       | 1186 | 2.05                          |
| 200           | 1274                     | 633  | 2.01                          | 2236                       | 1093 | 2.05                          |
| 220           | 1161                     | 586  | 1.98                          | 2060                       | 1019 | 2.02                          |
| 240           | 1048                     | 523  | 2.01                          | 1887                       | 929  | 2.03                          |
| 260           | 969                      | 492  | 1.97                          | 1672                       | 833  | 2.01                          |
| 280           | 885                      | 455  | 1.95                          | 1488                       | 753  | 1.98                          |
| 300           | 811                      | 415  | 1.96                          | 1275                       | 649  | 1.96                          |
| 320           | 746                      | 387  | 1.93                          | 1055                       | 545  | 1.93                          |
| 340           | 680                      | 362  | 1.88                          | 870                        | 470  | 1.85                          |
| 360           | 624                      | 326  | 1.91                          | 682                        | 376  | 1.81                          |

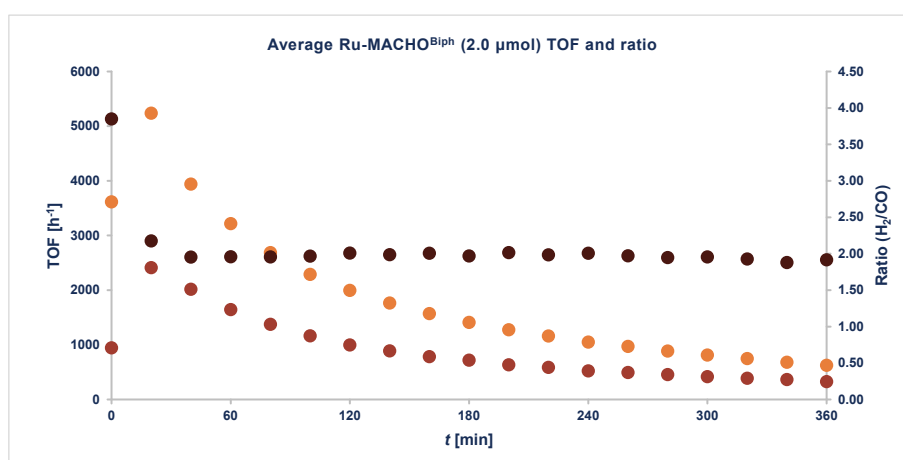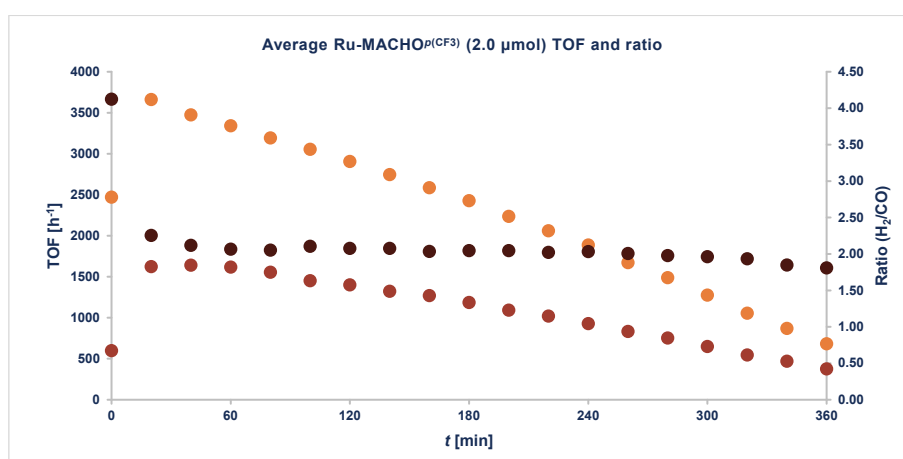

**Table S8.** Summary of results for Ru-MACHO<sup>R</sup> (2.0 μmol). *Continued.*

| Time<br>[min] | Ru-MACHO <sup>p(OMe)</sup> |      |                               | Ru-MACHO <sup>Et</sup> |      |                               |
|---------------|----------------------------|------|-------------------------------|------------------------|------|-------------------------------|
|               | TOF [h <sup>-1</sup> ]     |      | Ratio<br>(H <sub>2</sub> /CO) | TOF [h <sup>-1</sup> ] |      | Ratio<br>(H <sub>2</sub> /CO) |
|               | H <sub>2</sub>             | CO   |                               | H <sub>2</sub>         | CO   |                               |
| 0             | 6134                       | 1516 | 4.08                          | 1568                   | 168  | 9.83                          |
| 20            | 5609                       | 2553 | 2.20                          | 2751                   | 1073 | 2.57                          |
| 40            | 5252                       | 2549 | 2.06                          | 2548                   | 1156 | 2.21                          |
| 60            | 4950                       | 2465 | 2.01                          | 2453                   | 1130 | 2.17                          |
| 80            | 4905                       | 2434 | 2.02                          | 2407                   | 1112 | 2.17                          |
| 100           | 4644                       | 2281 | 2.04                          | 2347                   | 1069 | 2.20                          |
| 120           | 4272                       | 2096 | 2.04                          | 2269                   | 1044 | 2.18                          |
| 140           | 3886                       | 1911 | 2.03                          | 2209                   | 1022 | 2.16                          |
| 160           | 3666                       | 1804 | 2.03                          | 2061                   | 954  | 2.16                          |
| 180           | 3531                       | 1740 | 2.03                          | 1953                   | 913  | 2.14                          |
| 200           | 3289                       | 1614 | 2.04                          | 2148                   | 986  | 2.18                          |
| 220           | 3037                       | 1479 | 2.05                          | 1951                   | 896  | 2.18                          |
| 240           | 2765                       | 1352 | 2.04                          | 1829                   | 848  | 2.16                          |
| 260           | 2608                       | 1281 | 2.04                          | 1837                   | 837  | 2.20                          |
| 280           | 2466                       | 1217 | 2.03                          | 1847                   | 828  | 2.23                          |
| 300           | 2364                       | 1162 | 2.04                          | 1808                   | 824  | 2.19                          |
| 320           | 2209                       | 1081 | 2.04                          | 1651                   | 774  | 2.13                          |
| 340           | 2118                       | 1033 | 2.05                          | 1567                   | 735  | 2.13                          |
| 360           | 1919                       | 940  | 2.04                          | 1579                   | 751  | 2.10                          |

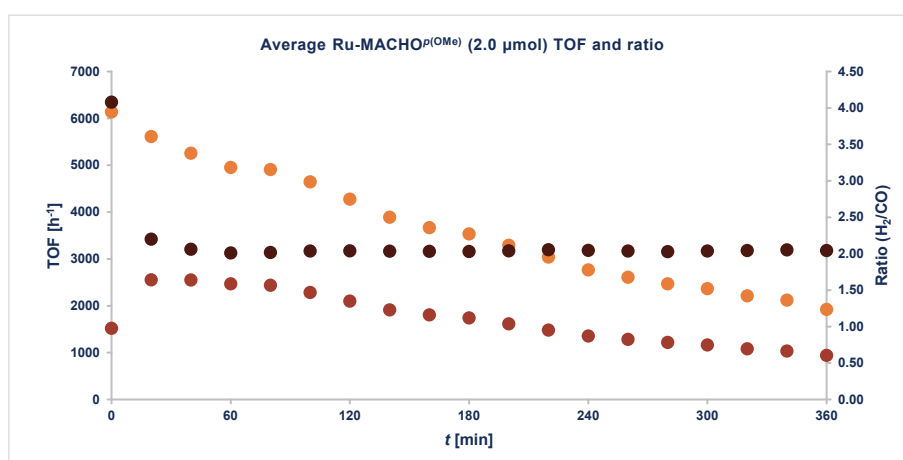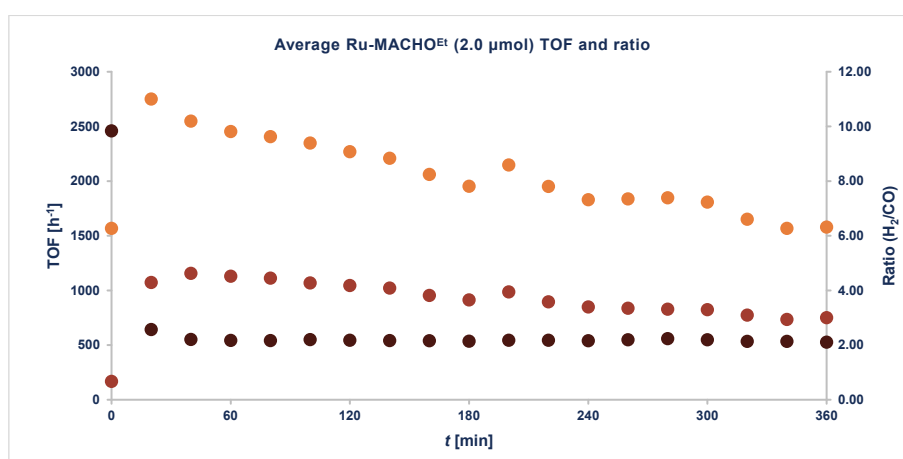

Table S8. Summary of results for Ru-MACHO<sup>R</sup> (2.0 μmol). *Continued.*

| Time<br>[min] | Ru-MACHO <sup>iPr</sup> |      |                               | Ru-MACHO <sup>iBu</sup> |     |                               |
|---------------|-------------------------|------|-------------------------------|-------------------------|-----|-------------------------------|
|               | TOF [h <sup>-1</sup> ]  |      | Ratio<br>(H <sub>2</sub> /CO) | TOF [h <sup>-1</sup> ]  |     | Ratio<br>(H <sub>2</sub> /CO) |
|               | H <sub>2</sub>          | CO   |                               | H <sub>2</sub>          | CO  |                               |
| 0             | 4506                    | 1713 | 3.19                          | 765                     | 119 | 6.41                          |
| 20            | 6129                    | 2924 | 2.09                          | 820                     | 256 | 3.19                          |
| 40            | 5778                    | 2792 | 2.07                          | 319                     | 144 | 2.22                          |
| 60            | 5593                    | 2722 | 2.05                          | 276                     | 114 | 2.41                          |
| 80            | 5367                    | 2639 | 2.03                          | 239                     | 101 | 2.38                          |
| 100           | 5177                    | 2543 | 2.03                          | 218                     | 93  | 2.34                          |
| 120           | 4963                    | 2415 | 2.05                          | 202                     | 87  | 2.33                          |
| 140           | 4700                    | 2307 | 2.04                          | 192                     | 82  | 2.35                          |
| 160           | 4539                    | 2221 | 2.04                          | 180                     | 78  | 2.30                          |
| 180           | 4267                    | 2084 | 2.05                          | 170                     | 74  | 2.33                          |
| 200           | 4130                    | 2027 | 2.04                          | 165                     | 71  | 2.32                          |
| 220           | 3921                    | 1909 | 2.05                          | 155                     | 68  | 2.29                          |
| 240           | 3645                    | 1774 | 2.05                          | 146                     | 64  | 2.28                          |
| 260           | 3456                    | 1694 | 2.04                          | 140                     | 60  | 2.36                          |
| 280           | 3265                    | 1611 | 2.03                          | 130                     | 57  | 2.32                          |
| 300           | 3081                    | 1510 | 2.04                          | 128                     | 55  | 2.37                          |
| 320           | 2964                    | 1438 | 2.06                          | 118                     | 51  | 2.33                          |
| 340           | 2690                    | 1325 | 2.03                          | 115                     | 49  | 2.38                          |
| 360           | 2444                    | 1218 | 2.00                          | 107                     | 47  | 2.34                          |

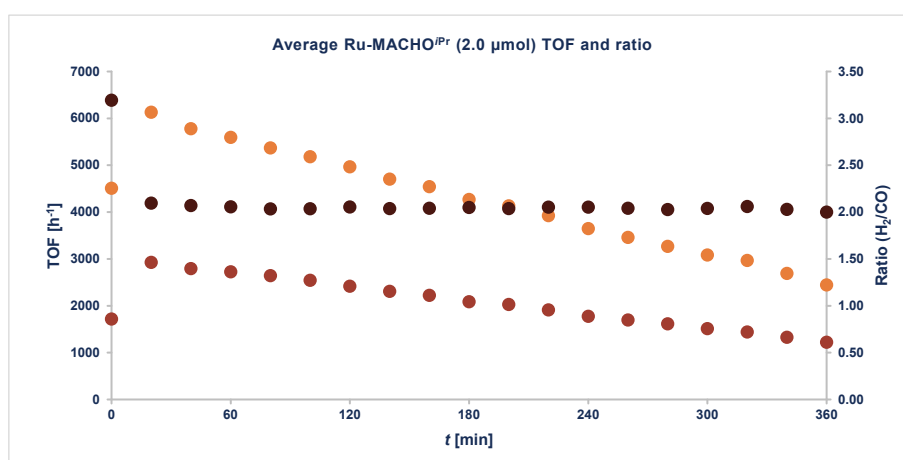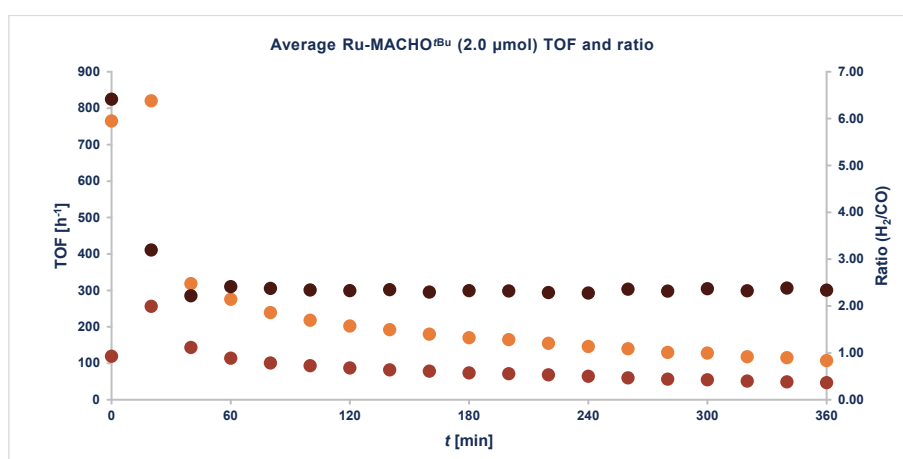

**Table S8.** Summary of results for Ru-MACHO<sup>R</sup> (2.0  $\mu\text{mol}$ ). *Continued.*

| Time<br>[min] | Ru-MACHO <sup>Cy</sup>  |             |                                     | Ru-MACHO <sup>Ad</sup>  |             |                                     |
|---------------|-------------------------|-------------|-------------------------------------|-------------------------|-------------|-------------------------------------|
|               | TOF [ $\text{h}^{-1}$ ] |             | Ratio<br>( $\text{H}_2/\text{CO}$ ) | TOF [ $\text{h}^{-1}$ ] |             | Ratio<br>( $\text{H}_2/\text{CO}$ ) |
|               | $\text{H}_2$            | $\text{CO}$ |                                     | $\text{H}_2$            | $\text{CO}$ |                                     |
| 0             | 2725                    | 605         | 4.56                                | 208                     | 22          | 11.16                               |
| 20            | 4634                    | 2102        | 2.20                                | 515                     | 162         | 3.19                                |
| 40            | 4947                    | 2313        | 2.14                                | 246                     | 105         | 2.33                                |
| 60            | 4418                    | 2074        | 2.13                                | 164                     | 74          | 2.21                                |
| 80            | 4520                    | 2139        | 2.11                                | 133                     | 61          | 2.19                                |
| 100           | 4706                    | 2216        | 2.12                                | 122                     | 55          | 2.20                                |
| 120           | 4489                    | 2111        | 2.13                                | 115                     | 52          | 2.21                                |
| 140           | 4211                    | 1989        | 2.12                                | 111                     | 50          | 2.20                                |
| 160           | 4456                    | 2107        | 2.11                                | 107                     | 49          | 2.21                                |
| 180           | 4290                    | 2016        | 2.13                                | 108                     | 49          | 2.21                                |
| 200           | 3828                    | 1812        | 2.11                                | 103                     | 47          | 2.18                                |
| 220           | 4053                    | 1903        | 2.13                                | 99                      | 45          | 2.19                                |
| 240           | 3771                    | 1772        | 2.13                                | 97                      | 45          | 2.16                                |
| 260           | 3623                    | 1706        | 2.12                                | 96                      | 44          | 2.17                                |
| 280           | 3828                    | 1794        | 2.13                                | 92                      | 42          | 2.19                                |
| 300           | 3435                    | 1612        | 2.13                                | 89                      | 41          | 2.18                                |
| 320           | 3301                    | 1568        | 2.10                                | 87                      | 40          | 2.17                                |
| 340           | 3404                    | 1598        | 2.13                                | 85                      | 39          | 2.19                                |
| 360           | 3046                    | 1436        | 2.12                                | 80                      | 37          | 2.20                                |

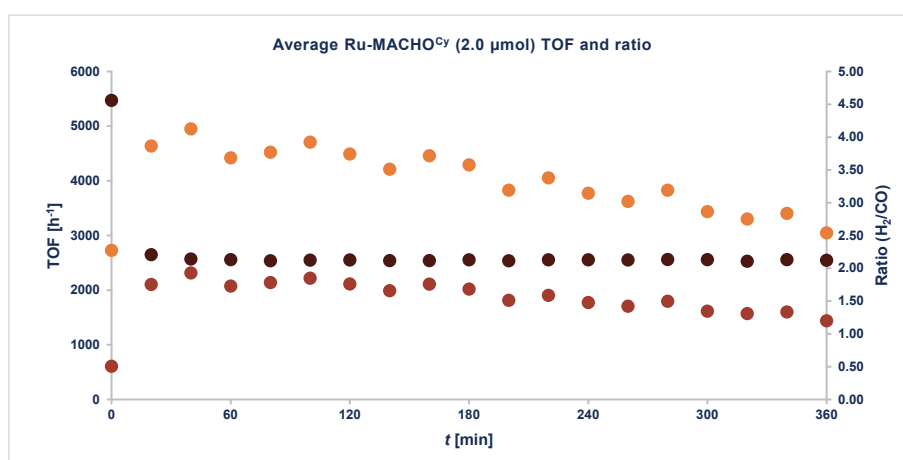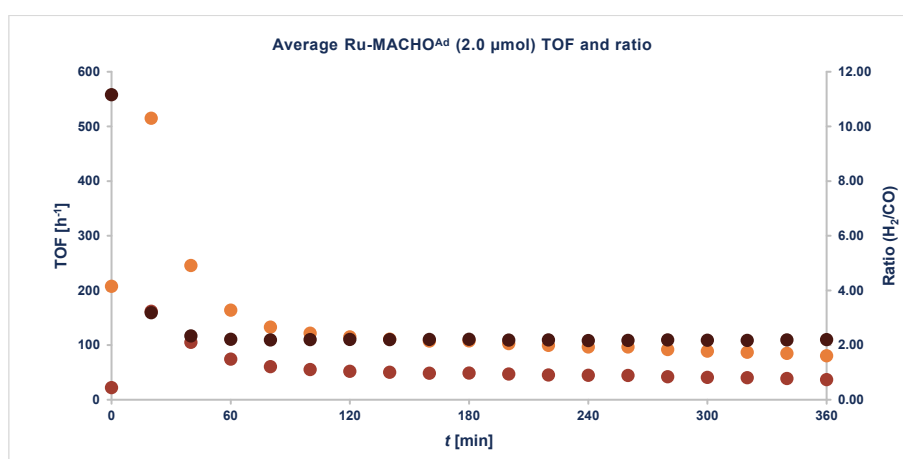

**Table S9.** Summary of results for Ru-MACHO<sup>R</sup> (0.20 μmol). All entries are given as an average of two.

| Time<br>[min] | Ru-MACHO <sup>Ph</sup> |      |                               | Ru-MACHO <sup>p(Me)</sup> |      |                               |
|---------------|------------------------|------|-------------------------------|---------------------------|------|-------------------------------|
|               | TOF [h <sup>-1</sup> ] |      | Ratio<br>(H <sub>2</sub> /CO) | TOF [h <sup>-1</sup> ]    |      | Ratio<br>(H <sub>2</sub> /CO) |
|               | H <sub>2</sub>         | CO   |                               | H <sub>2</sub>            | CO   |                               |
| 0             | 6099                   | 1012 | 5.93                          | 8120                      | 1342 | 6.06                          |
| 20            | 21883                  | 8787 | 2.51                          | 19332                     | 8212 | 2.36                          |
| 40            | 19520                  | 9355 | 2.09                          | 17906                     | 8436 | 2.12                          |
| 60            | 17097                  | 8423 | 2.03                          | 17031                     | 7922 | 2.15                          |
| 80            | 14605                  | 7283 | 2.01                          | 15476                     | 7236 | 2.14                          |
| 100           | 12635                  | 6392 | 1.98                          | 13968                     | 6638 | 2.10                          |
| 120           | 10379                  | 5342 | 1.94                          | 12989                     | 6385 | 2.03                          |
| 140           | 8628                   | 4555 | 1.89                          | 12256                     | 5998 | 2.04                          |
| 160           | 7049                   | 3698 | 1.90                          | 11364                     | 5341 | 2.13                          |
| 180           | 5694                   | 2897 | 1.94                          | 9970                      | 4801 | 2.08                          |
| 200           | 4740                   | 2452 | 1.91                          | 8998                      | 4571 | 1.97                          |
| 220           | 3845                   | 2056 | 1.86                          | 8405                      | 4114 | 2.05                          |
| 240           | 3233                   | 1747 | 1.85                          | 7252                      | 3324 | 2.18                          |
| 260           | 2848                   | 1532 | 1.87                          | 6478                      | 3074 | 2.11                          |
| 280           | 2424                   | 1296 | 1.88                          | 5706                      | 2816 | 2.03                          |
| 300           | 2154                   | 1148 | 1.89                          | 5070                      | 2594 | 1.95                          |
| 320           | 1916                   | 1012 | 1.91                          | 4434                      | 2352 | 1.88                          |
| 340           | 1701                   | 885  | 1.94                          | 3911                      | 2132 | 1.84                          |
| 360           | 1549                   | 796  | 1.96                          | 3451                      | 1920 | 1.80                          |

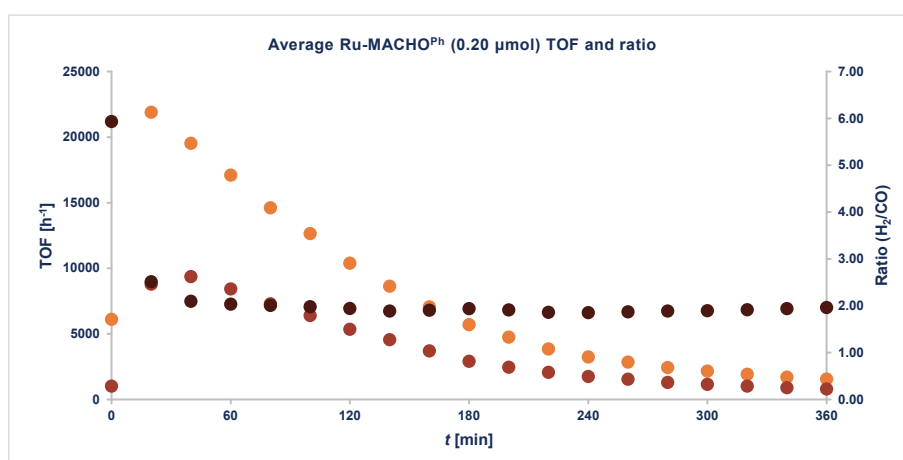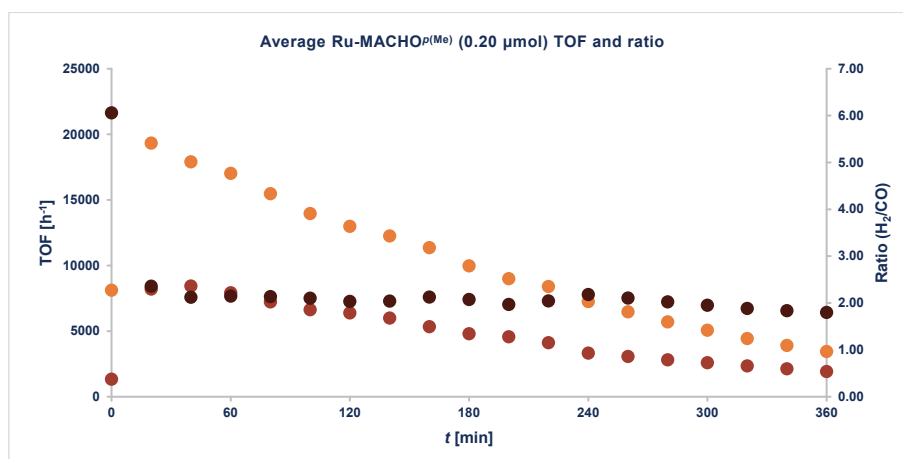

Table S9. Summary of results for Ru-MACHO<sup>R</sup> (0.20 μmol). *Continued.*

| Time<br>[min] | Ru-MACHO <sup>m,m(Me)</sup> |      |                               | Ru-MACHO <sup>p(iPr)</sup> |      |                               |
|---------------|-----------------------------|------|-------------------------------|----------------------------|------|-------------------------------|
|               | TOF [h <sup>-1</sup> ]      |      | Ratio<br>(H <sub>2</sub> /CO) | TOF [h <sup>-1</sup> ]     |      | Ratio<br>(H <sub>2</sub> /CO) |
|               | H <sub>2</sub>              | CO   |                               | H <sub>2</sub>             | CO   |                               |
| 0             | 5594                        | 798  | 7.38                          | 5547                       | 856  | 6.55                          |
| 20            | 14575                       | 4974 | 2.94                          | 19927                      | 7822 | 2.56                          |
| 40            | 13394                       | 5961 | 2.25                          | 18992                      | 8870 | 2.15                          |
| 60            | 12355                       | 5867 | 2.11                          | 17448                      | 8401 | 2.08                          |
| 80            | 11782                       | 5692 | 2.07                          | 16243                      | 7888 | 2.06                          |
| 100           | 10884                       | 5328 | 2.04                          | 14662                      | 7210 | 2.03                          |
| 120           | 10145                       | 5016 | 2.02                          | 13201                      | 6508 | 2.03                          |
| 140           | 9270                        | 4656 | 1.99                          | 11933                      | 5953 | 2.00                          |
| 160           | 8402                        | 4260 | 1.97                          | 10681                      | 5395 | 1.98                          |
| 180           | 7739                        | 3735 | 2.09                          | 9510                       | 4838 | 1.96                          |
| 200           | 7150                        | 3257 | 2.19                          | 8616                       | 4444 | 1.94                          |
| 220           | 6606                        | 3076 | 2.15                          | 7310                       | 3663 | 2.00                          |
| 240           | 5969                        | 2856 | 2.09                          | 6371                       | 3086 | 2.06                          |
| 260           | 5314                        | 2646 | 2.01                          | 5621                       | 2821 | 1.98                          |
| 280           | 4651                        | 2418 | 1.92                          | 5015                       | 2562 | 1.95                          |
| 300           | 4160                        | 2195 | 1.90                          | 4431                       | 2301 | 1.92                          |
| 320           | 3818                        | 2013 | 1.90                          | 3854                       | 2047 | 1.88                          |
| 340           | 3587                        | 1903 | 1.88                          | 3511                       | 1866 | 1.88                          |
| 360           | 3168                        | 1684 | 1.88                          | 3224                       | 1710 | 1.89                          |

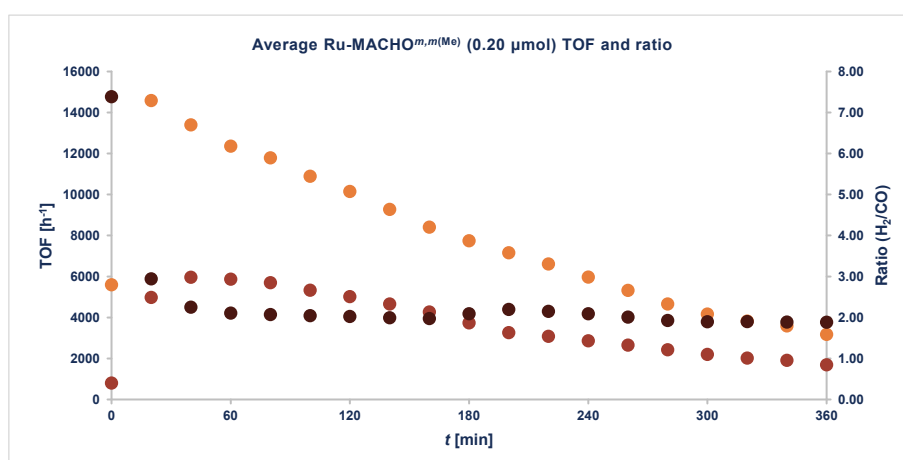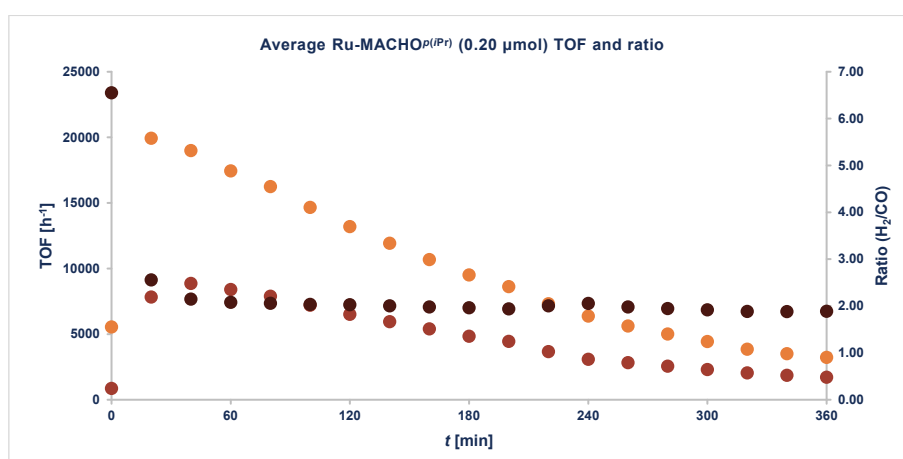

Table S9. Summary of results for Ru-MACHO<sup>R</sup> (0.20 μmol). *Continued.*

| Time<br>[min] | Ru-MACHO <sup>p(3-Pe)</sup> |      |                               | Ru-MACHO <sup>Naph</sup> |      |                               |
|---------------|-----------------------------|------|-------------------------------|--------------------------|------|-------------------------------|
|               | TOF [h <sup>-1</sup> ]      |      | Ratio<br>(H <sub>2</sub> /CO) | TOF [h <sup>-1</sup> ]   |      | Ratio<br>(H <sub>2</sub> /CO) |
|               | H <sub>2</sub>              | CO   |                               | H <sub>2</sub>           | CO   |                               |
| 0             | 3182                        | 331  | 9.67                          | 1701                     | 180  | 10.29                         |
| 20            | 13229                       | 4966 | 2.73                          | 8837                     | 2338 | 3.79                          |
| 40            | 13005                       | 5708 | 2.28                          | 10397                    | 4184 | 2.49                          |
| 60            | 12153                       | 5591 | 2.17                          | 9769                     | 4533 | 2.15                          |
| 80            | 11391                       | 5386 | 2.11                          | 9008                     | 4479 | 2.01                          |
| 100           | 10806                       | 5215 | 2.07                          | 8172                     | 4120 | 1.98                          |
| 120           | 10449                       | 4985 | 2.10                          | 7549                     | 3653 | 2.09                          |
| 140           | 9642                        | 4687 | 2.06                          | 6856                     | 3369 | 2.05                          |
| 160           | 8979                        | 4409 | 2.04                          | 6412                     | 2968 | 2.15                          |
| 180           | 8623                        | 4273 | 2.02                          | 5981                     | 2821 | 2.11                          |
| 200           | 8022                        | 3761 | 2.15                          | 5391                     | 2605 | 2.06                          |
| 220           | 7247                        | 3199 | 2.27                          | 5061                     | 2509 | 2.01                          |
| 240           | 6789                        | 3054 | 2.22                          | 4803                     | 2399 | 2.00                          |
| 260           | 6323                        | 2913 | 2.17                          | 4404                     | 2227 | 1.98                          |
| 280           | 5945                        | 2792 | 2.13                          | 4060                     | 2080 | 1.95                          |
| 300           | 5384                        | 2607 | 2.07                          | 3784                     | 1969 | 1.93                          |
| 320           | 5024                        | 2492 | 2.02                          | 3523                     | 1813 | 1.94                          |
| 340           | 4546                        | 2321 | 1.96                          | 3333                     | 1733 | 1.93                          |
| 360           | 4233                        | 2184 | 1.94                          | 3099                     | 1611 | 1.93                          |

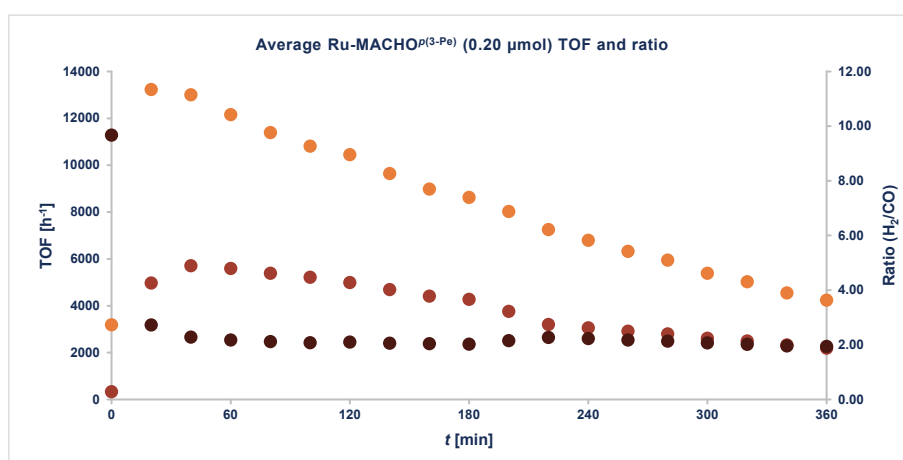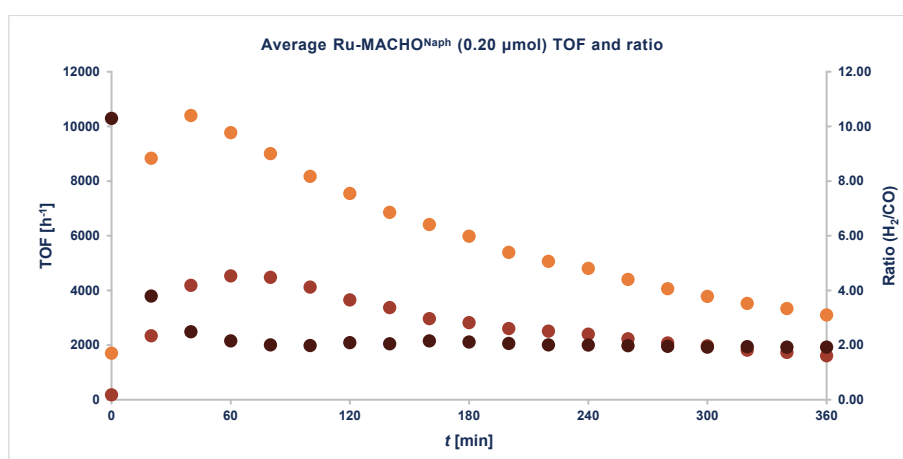

Table S9. Summary of results for Ru-MACHO<sup>R</sup> (0.20 μmol). *Continued.*

| Time<br>[min] | Ru-MACHO <sup>Biph</sup> |      |                               | Ru-MACHO <sup>p(CF3)</sup> |      |                               |
|---------------|--------------------------|------|-------------------------------|----------------------------|------|-------------------------------|
|               | TOF [h <sup>-1</sup> ]   |      | Ratio<br>(H <sub>2</sub> /CO) | TOF [h <sup>-1</sup> ]     |      | Ratio<br>(H <sub>2</sub> /CO) |
|               | H <sub>2</sub>           | CO   |                               | H <sub>2</sub>             | CO   |                               |
| 0             | 3417                     | 496  | 7.18                          | 2747                       | 366  | 7.52                          |
| 20            | 10055                    | 3023 | 3.35                          | 7908                       | 2562 | 3.08                          |
| 40            | 9136                     | 3873 | 2.37                          | 6569                       | 2762 | 2.37                          |
| 60            | 7417                     | 3516 | 2.12                          | 5103                       | 2504 | 2.03                          |
| 80            | 6068                     | 2656 | 2.31                          | 4012                       | 2137 | 1.87                          |
| 100           | 4708                     | 2416 | 1.94                          | 3133                       | 1722 | 1.82                          |
| 120           | 3933                     | 2121 | 1.86                          | 2439                       | 1379 | 1.76                          |
| 140           | 3288                     | 1788 | 1.84                          | 1856                       | 1043 | 1.78                          |
| 160           | 2767                     | 1504 | 1.84                          | 1422                       | 784  | 1.82                          |
| 180           | 2315                     | 1244 | 1.86                          | 1155                       | 628  | 1.84                          |
| 200           | 1966                     | 1061 | 1.86                          | 966                        | 508  | 1.90                          |
| 220           | 1679                     | 893  | 1.88                          | 827                        | 424  | 1.95                          |
| 240           | 1447                     | 757  | 1.91                          | 730                        | 364  | 2.00                          |
| 260           | 1264                     | 649  | 1.95                          | 666                        | 326  | 2.04                          |
| 280           | 1129                     | 576  | 1.96                          | 617                        | 296  | 2.08                          |
| 300           | 1021                     | 514  | 1.98                          | 584                        | 278  | 2.10                          |
| 320           | 935                      | 468  | 2.00                          | 552                        | 261  | 2.11                          |
| 340           | 816                      | 391  | 2.09                          | 524                        | 245  | 2.14                          |
| 360           | 777                      | 382  | 2.03                          | 502                        | 234  | 2.15                          |

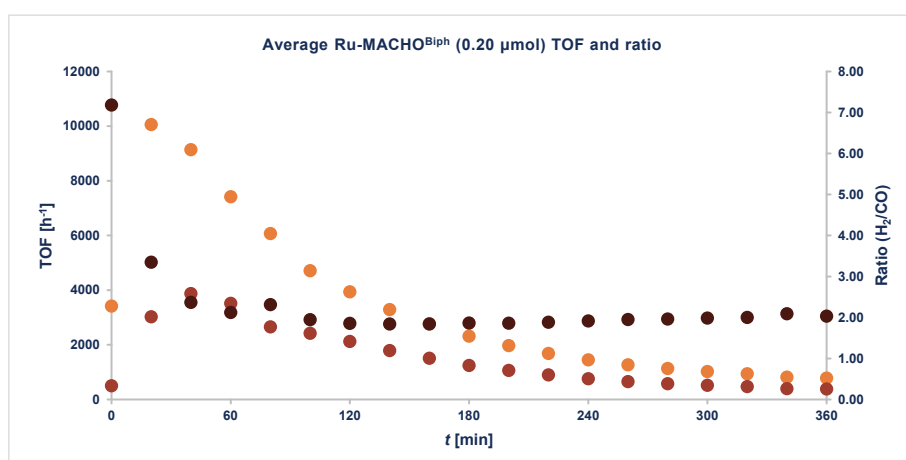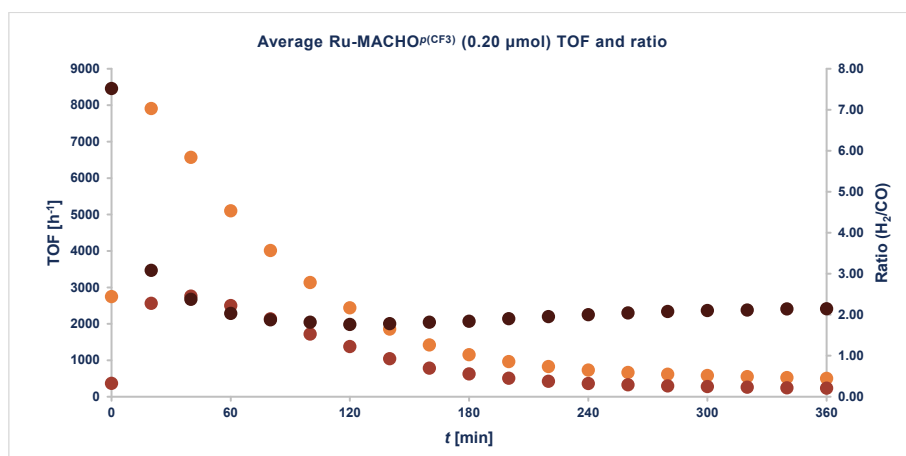

Table S9. Summary of results for Ru-MACHO<sup>R</sup> (0.20 μmol). *Continued.*

| Time<br>[min] | Ru-MACHO <sup>p</sup> (OMe) |      |                               | Ru-MACHO <sup>Et</sup> |      |                               |
|---------------|-----------------------------|------|-------------------------------|------------------------|------|-------------------------------|
|               | TOF [h <sup>-1</sup> ]      |      | Ratio<br>(H <sub>2</sub> /CO) | TOF [h <sup>-1</sup> ] |      | Ratio<br>(H <sub>2</sub> /CO) |
|               | H <sub>2</sub>              | CO   |                               | H <sub>2</sub>         | CO   |                               |
| 0             | 4510                        | 698  | 6.48                          | 2166                   | 206  | 11.03                         |
| 20            | 13659                       | 5037 | 2.71                          | 9654                   | 2179 | 4.43                          |
| 40            | 12496                       | 5666 | 2.21                          | 7809                   | 2362 | 3.30                          |
| 60            | 12315                       | 5905 | 2.09                          | 7087                   | 2369 | 2.99                          |
| 80            | 11121                       | 5441 | 2.04                          | 6887                   | 2385 | 2.89                          |
| 100           | 10515                       | 5212 | 2.02                          | 6522                   | 2327 | 2.80                          |
| 120           | 9290                        | 4707 | 1.97                          | 6466                   | 2355 | 2.74                          |
| 140           | 8613                        | 4339 | 1.99                          | 5907                   | 2235 | 2.64                          |
| 160           | 7983                        | 4074 | 1.96                          | 5815                   | 2208 | 2.63                          |
| 180           | 7235                        | 3509 | 2.08                          | 5522                   | 2132 | 2.58                          |
| 200           | 6417                        | 2952 | 2.17                          | 5007                   | 2023 | 2.47                          |
| 220           | 5977                        | 2834 | 2.11                          | 4820                   | 1966 | 2.45                          |
| 240           | 5230                        | 2582 | 2.03                          | 4894                   | 1988 | 2.46                          |
| 260           | 4665                        | 2391 | 1.95                          | 4743                   | 1967 | 2.41                          |
| 280           | 4290                        | 2248 | 1.91                          | 4434                   | 1860 | 2.38                          |
| 300           | 4035                        | 2090 | 1.93                          | 4367                   | 1854 | 2.36                          |
| 320           | 3718                        | 1936 | 1.92                          | 4271                   | 1835 | 2.33                          |
| 340           | 3276                        | 1715 | 1.91                          | 4135                   | 1799 | 2.30                          |
| 360           | 2974                        | 1560 | 1.91                          | 4123                   | 1803 | 2.28                          |

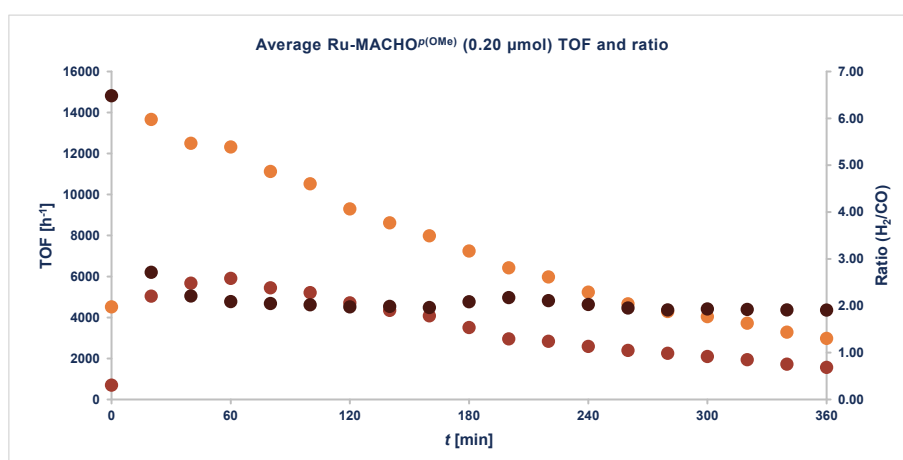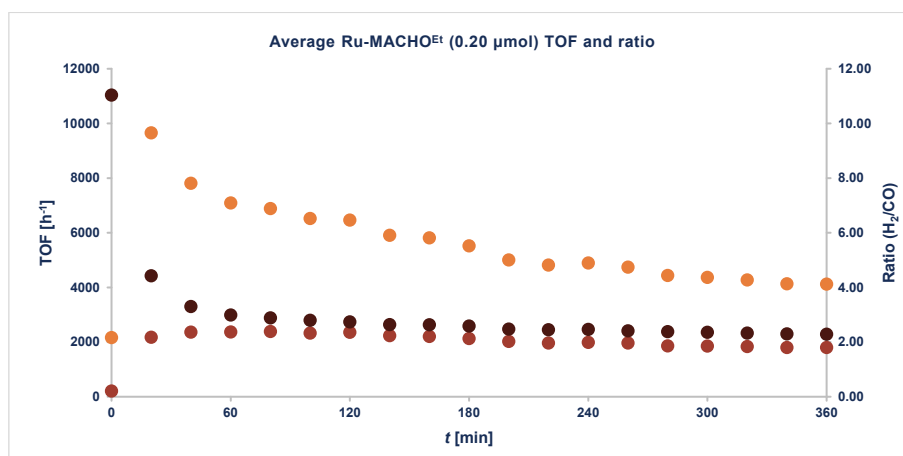

Table S9. Summary of results for Ru-MACHO<sup>R</sup> (0.20 μmol). *Continued.*

| Time<br>[min] | Ru-MACHO <sup>iPr</sup> |      |                               | Ru-MACHO <sup>Bu</sup> |     |                               |
|---------------|-------------------------|------|-------------------------------|------------------------|-----|-------------------------------|
|               | TOF [h <sup>-1</sup> ]  |      | Ratio<br>(H <sub>2</sub> /CO) | TOF [h <sup>-1</sup> ] |     | Ratio<br>(H <sub>2</sub> /CO) |
|               | H <sub>2</sub>          | CO   |                               | H <sub>2</sub>         | CO  |                               |
| 0             | 721                     | 87   | 8.46                          | 850                    | 67  | 12.69                         |
| 20            | 8482                    | 2185 | 3.88                          | 1827                   | 407 | 4.50                          |
| 40            | 7709                    | 2379 | 3.24                          | 636                    | 170 | 3.76                          |
| 60            | 6671                    | 2261 | 2.95                          | 397                    | 111 | 3.61                          |
| 80            | 5938                    | 2133 | 2.78                          | 344                    | 98  | 3.56                          |
| 100           | 5109                    | 1966 | 2.60                          | 323                    | 94  | 3.49                          |
| 120           | 4250                    | 1782 | 2.38                          | 301                    | 90  | 3.39                          |
| 140           | 3675                    | 1580 | 2.33                          | 295                    | 89  | 3.33                          |
| 160           | 3288                    | 1463 | 2.25                          | 278                    | 85  | 3.30                          |
| 180           | 3066                    | 1375 | 2.23                          | 266                    | 83  | 3.20                          |
| 200           | 2634                    | 1217 | 2.16                          | 266                    | 85  | 3.16                          |
| 220           | 2475                    | 1151 | 2.15                          | 254                    | 81  | 3.13                          |
| 240           | 2314                    | 1089 | 2.13                          | 240                    | 78  | 3.08                          |
| 260           | 2162                    | 1021 | 2.12                          | 242                    | 79  | 3.05                          |
| 280           | 2068                    | 977  | 2.12                          | 231                    | 77  | 3.00                          |
| 300           | 1952                    | 932  | 2.09                          | 230                    | 78  | 2.96                          |
| 320           | 1891                    | 898  | 2.11                          | 228                    | 76  | 3.00                          |
| 340           | 1766                    | 841  | 2.10                          | 221                    | 74  | 2.98                          |
| 360           | 1688                    | 811  | 2.08                          | 216                    | 74  | 2.92                          |

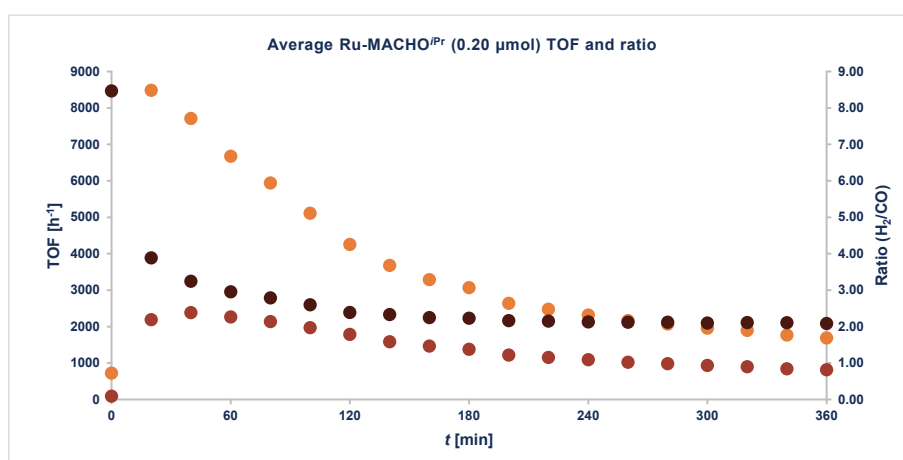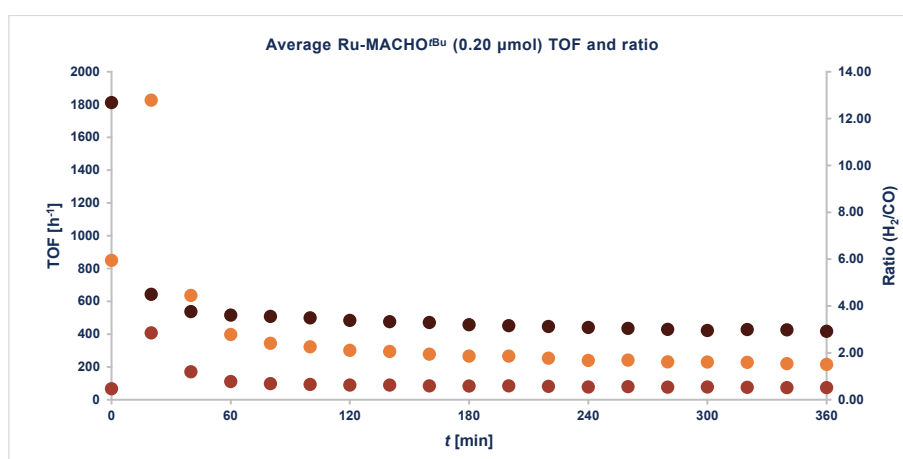

Table S9. Summary of results for Ru-MACHO<sup>R</sup> (0.20 μmol). *Continued.*

| Time<br>[min] | Ru-MACHO <sup>Cy</sup> |      |                               | Ru-MACHO <sup>Ad</sup> |      |                               |
|---------------|------------------------|------|-------------------------------|------------------------|------|-------------------------------|
|               | TOF [h <sup>-1</sup> ] |      | Ratio<br>(H <sub>2</sub> /CO) | TOF [h <sup>-1</sup> ] |      | Ratio<br>(H <sub>2</sub> /CO) |
|               | H <sub>2</sub>         | CO   |                               | H <sub>2</sub>         | CO   |                               |
| 0             | 2020                   | 319  | 6.29                          | 4591                   | 1004 | 4.54                          |
| 20            | 10991                  | 2698 | 4.07                          | 1648                   | 557  | 2.97                          |
| 40            | 10596                  | 2832 | 3.73                          | 779                    | 311  | 2.52                          |
| 60            | 9763                   | 2728 | 3.56                          | 486                    | 207  | 2.35                          |
| 80            | 9248                   | 2675 | 3.44                          | 332                    | 145  | 2.28                          |
| 100           | 8825                   | 2590 | 3.39                          | 271                    | 119  | 2.28                          |
| 120           | 8080                   | 2457 | 3.26                          | 239                    | 105  | 2.29                          |
| 140           | 7295                   | 2332 | 3.10                          | 212                    | 92   | 2.31                          |
| 160           | 7122                   | 2295 | 3.06                          | 185                    | 81   | 2.30                          |
| 180           | 6729                   | 2226 | 3.00                          | 175                    | 77   | 2.27                          |
| 200           | 6185                   | 2118 | 2.88                          | 157                    | 68   | 2.32                          |
| 220           | 5427                   | 1975 | 2.70                          | 150                    | 64   | 2.36                          |
| 240           | 5066                   | 1915 | 2.61                          | 138                    | 57   | 2.41                          |
| 260           | 4720                   | 1835 | 2.54                          | 136                    | 55   | 2.46                          |
| 280           | 4291                   | 1715 | 2.47                          | 130                    | 52   | 2.50                          |
| 300           | 3870                   | 1598 | 2.39                          | 131                    | 52   | 2.54                          |
| 320           | 3525                   | 1494 | 2.33                          | 127                    | 49   | 2.59                          |
| 340           | 3411                   | 1451 | 2.32                          | 125                    | 47   | 2.67                          |
| 360           | 2955                   | 1298 | 2.25                          | 124                    | 46   | 2.72                          |

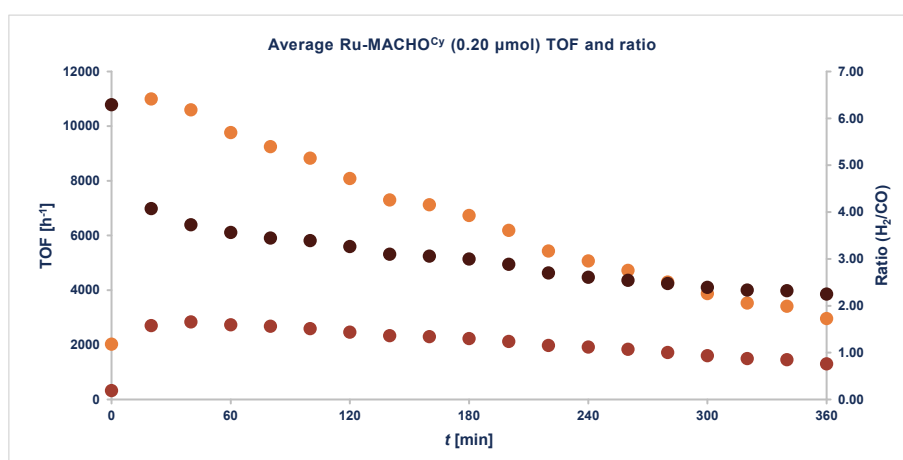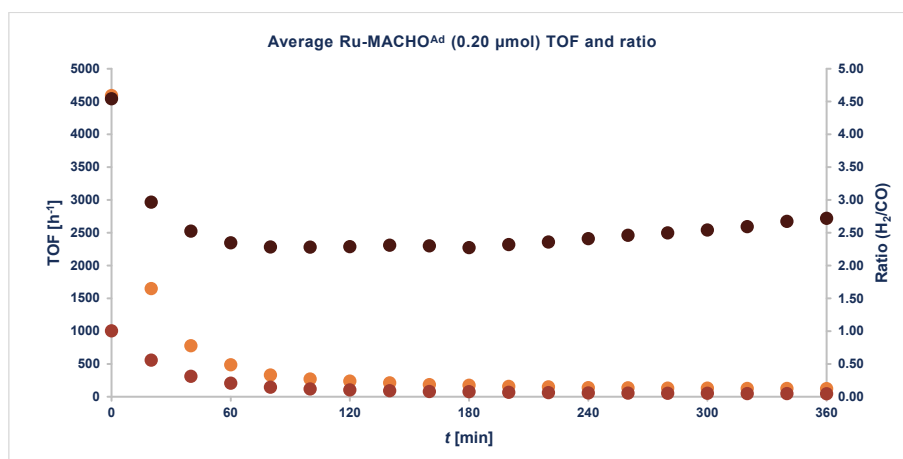

## Representative Inline GC Screenshots

One representative inline-GC screenshot showing both TCD and FID chromatograms are included below for each scope entry. Equivalent data are additionally provided for the scaled-up Ru-MACHO<sup>Cy</sup> experiment using the 45 mL reactor configuration.

### Ru-MACHO<sup>Ph</sup>

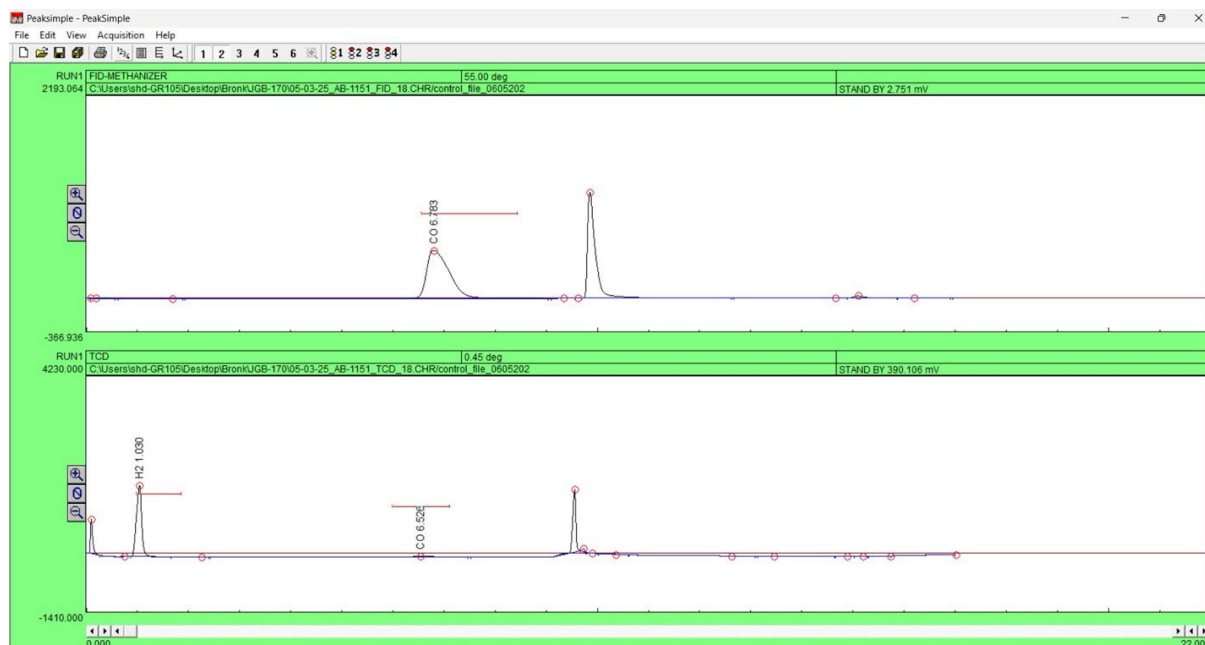

### Ru-MACHO<sup>p(Me)</sup>

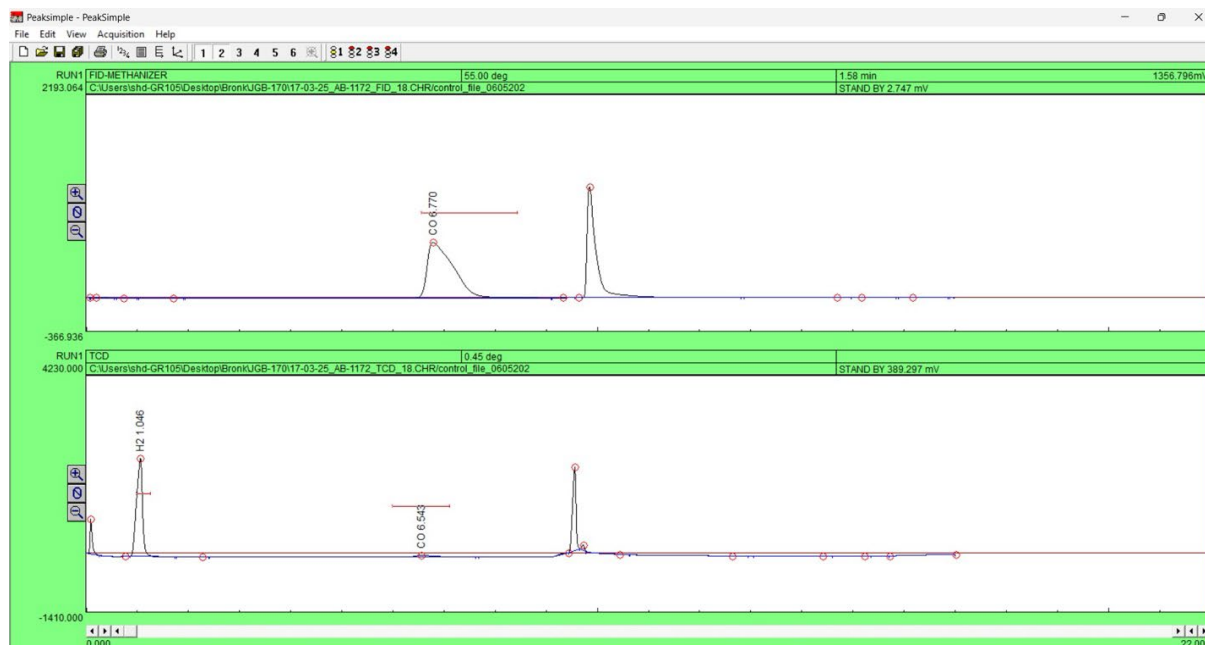

# Ru-MACHO<sup>m,m(Me)</sup>

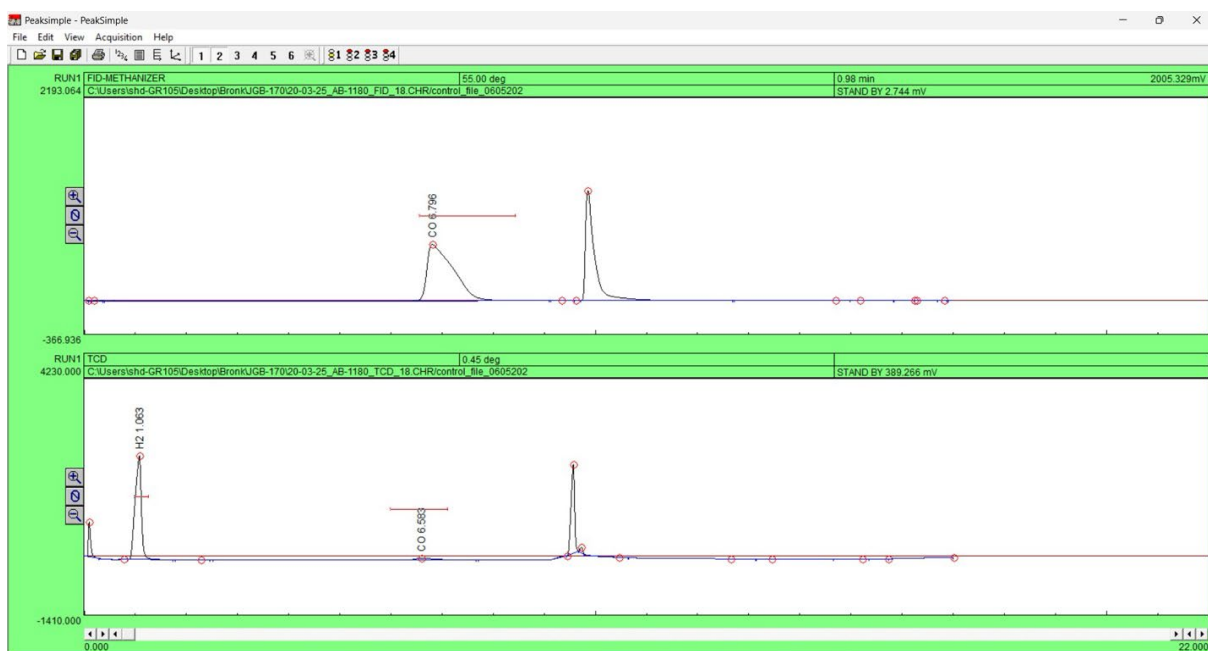

# Ru-MACHO<sup>p(iPr)</sup>

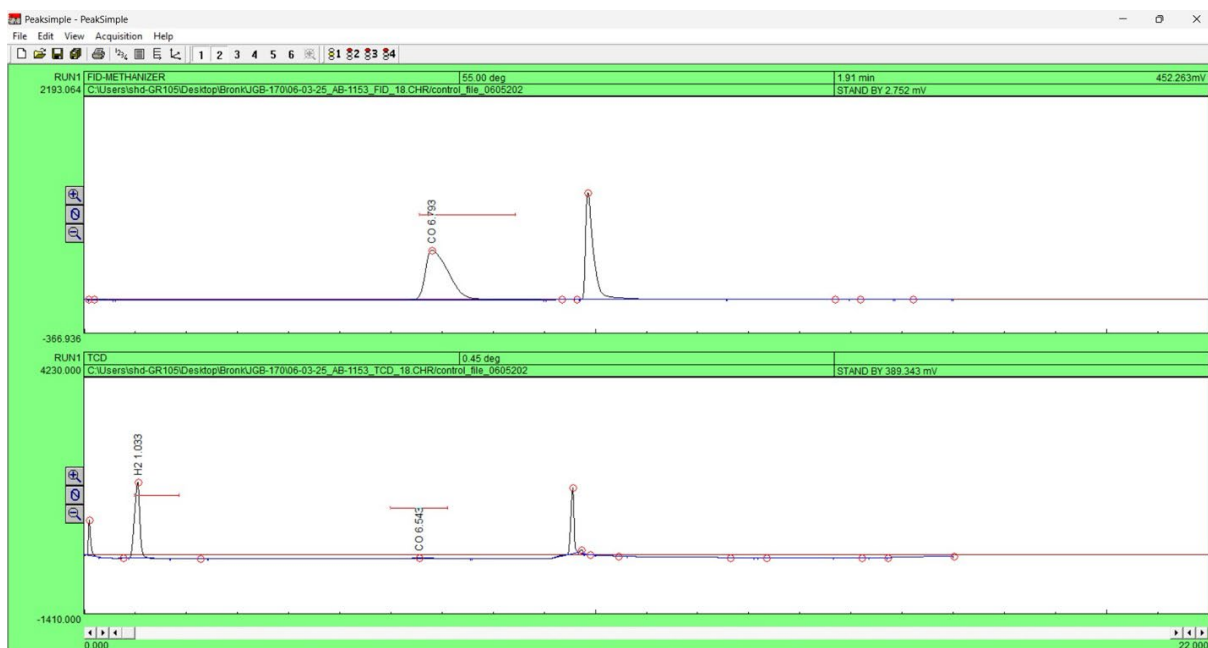

# Ru-MACHO<sup>p(3-Pe)</sup>

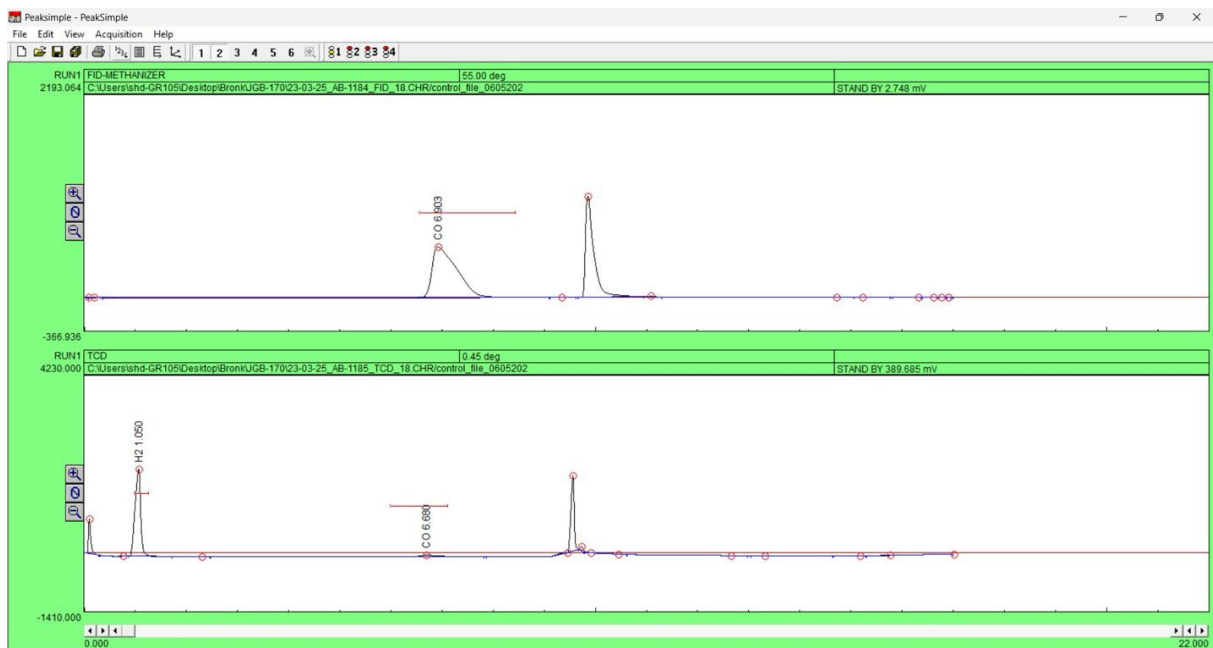

# Ru-MACHO<sup>Naph</sup>

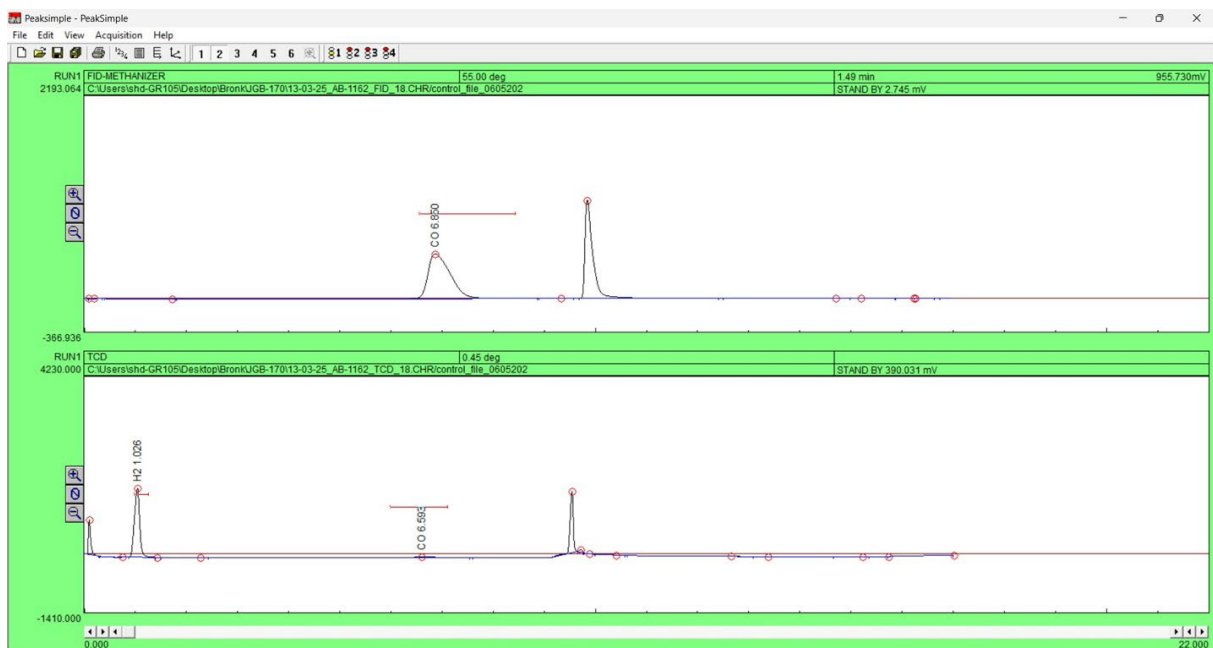

# Ru-MACHO<sup>Biph</sup>

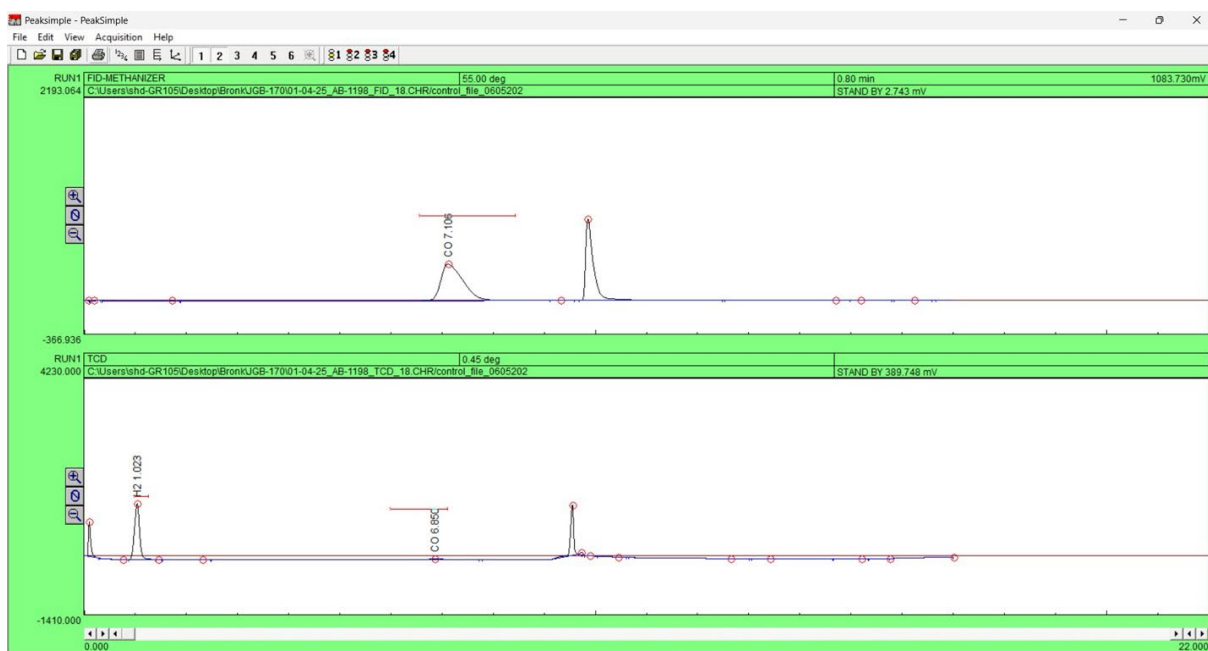

# Ru-MACHO<sup>p(CF3)</sup>

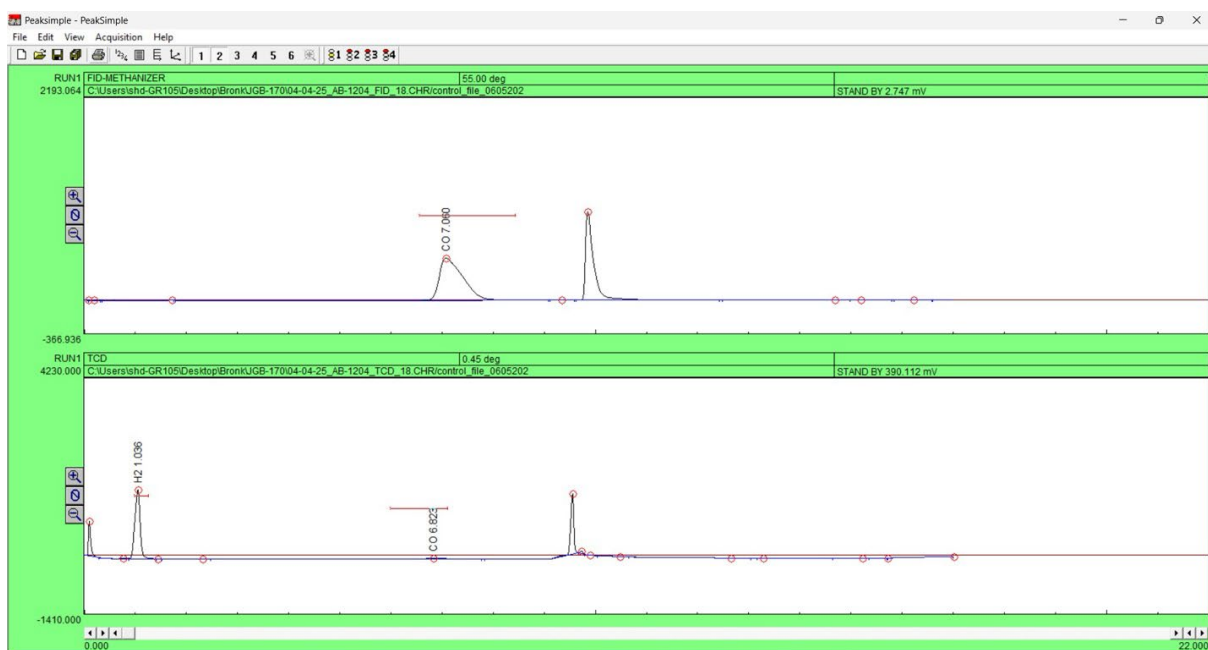

# Ru-MACHO<sup>p</sup>(OMe)

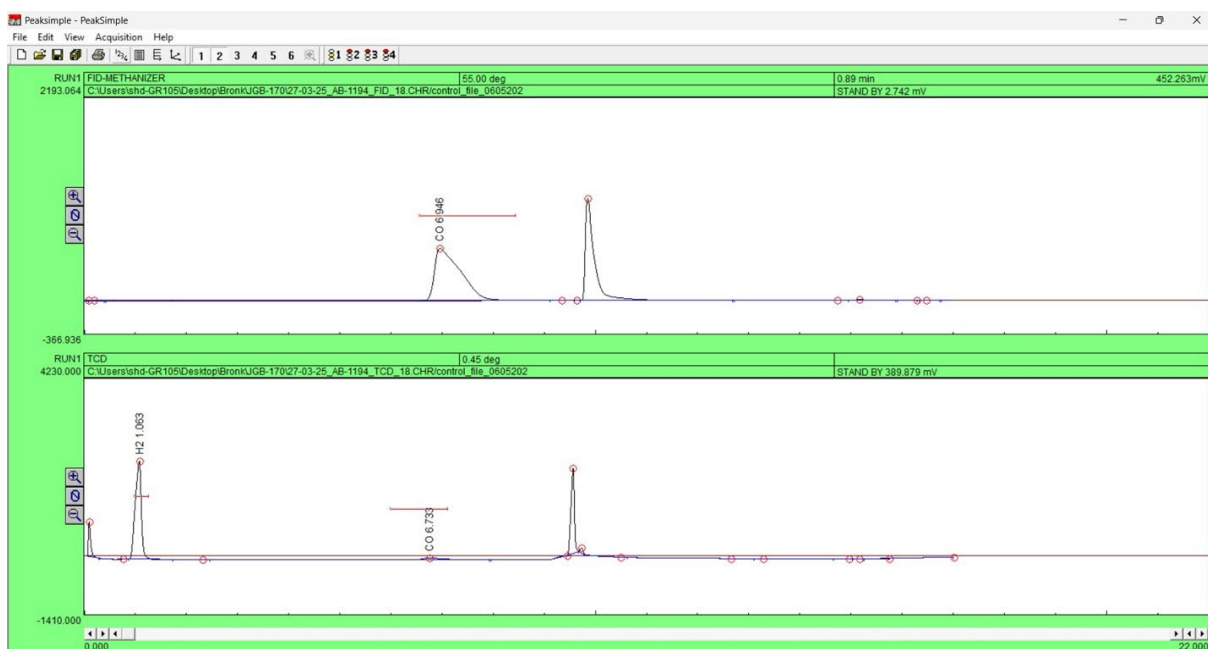

# Ru-MACHO<sup>Et</sup>

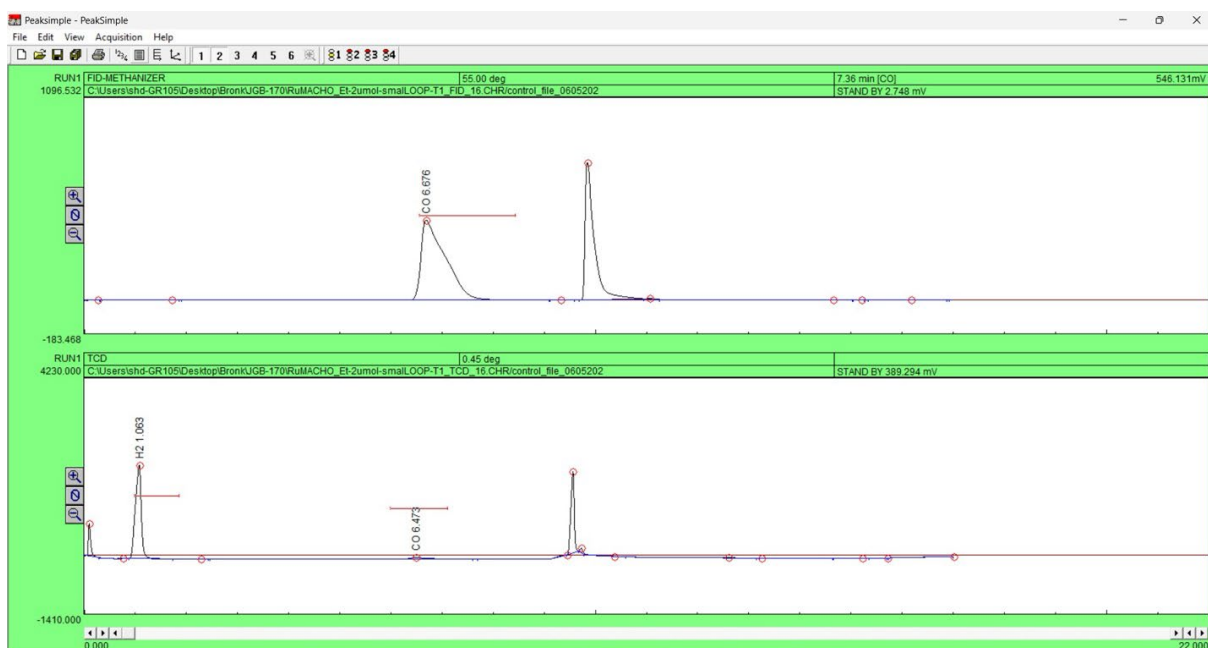

# Ru-MACHO<sup>iPr</sup>

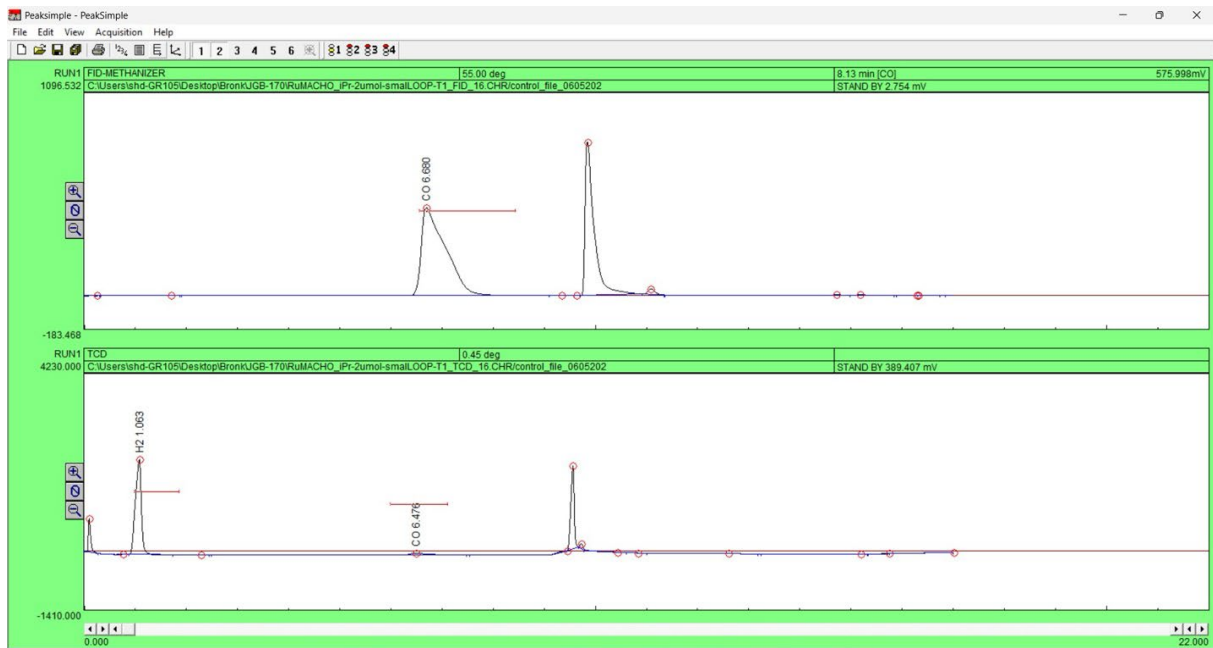

# Ru-MACHO<sup>tBu</sup>

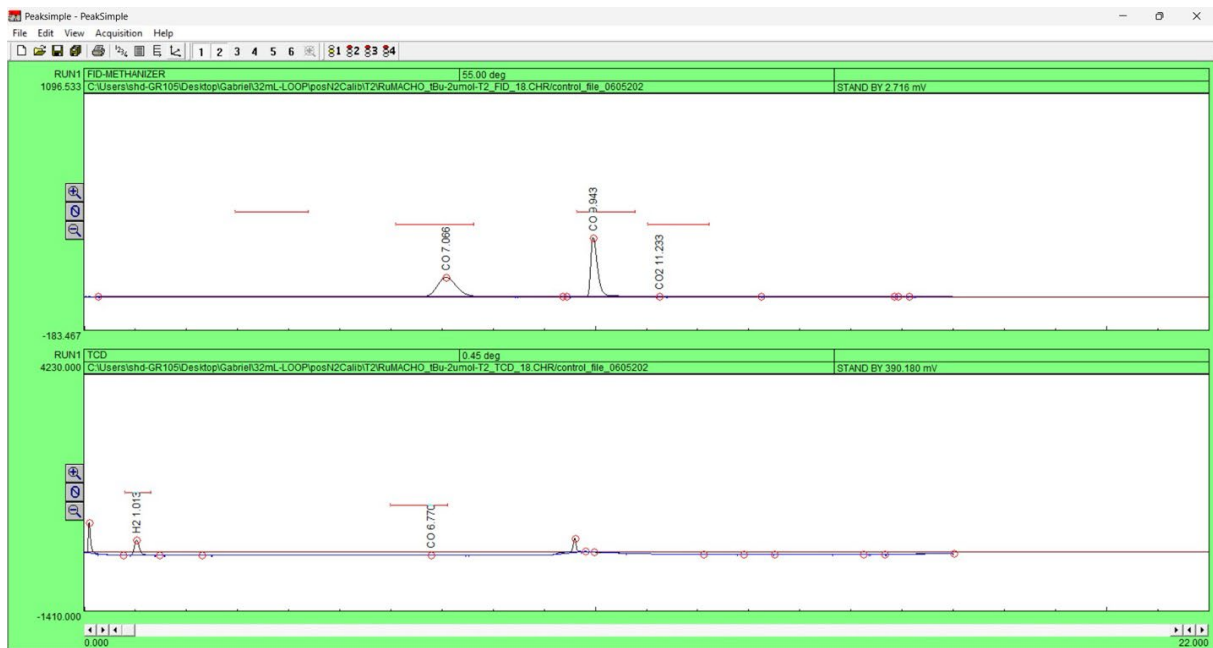

## Ru-MACHO<sup>Cy</sup> (2 μmol – 20 mL reactor)

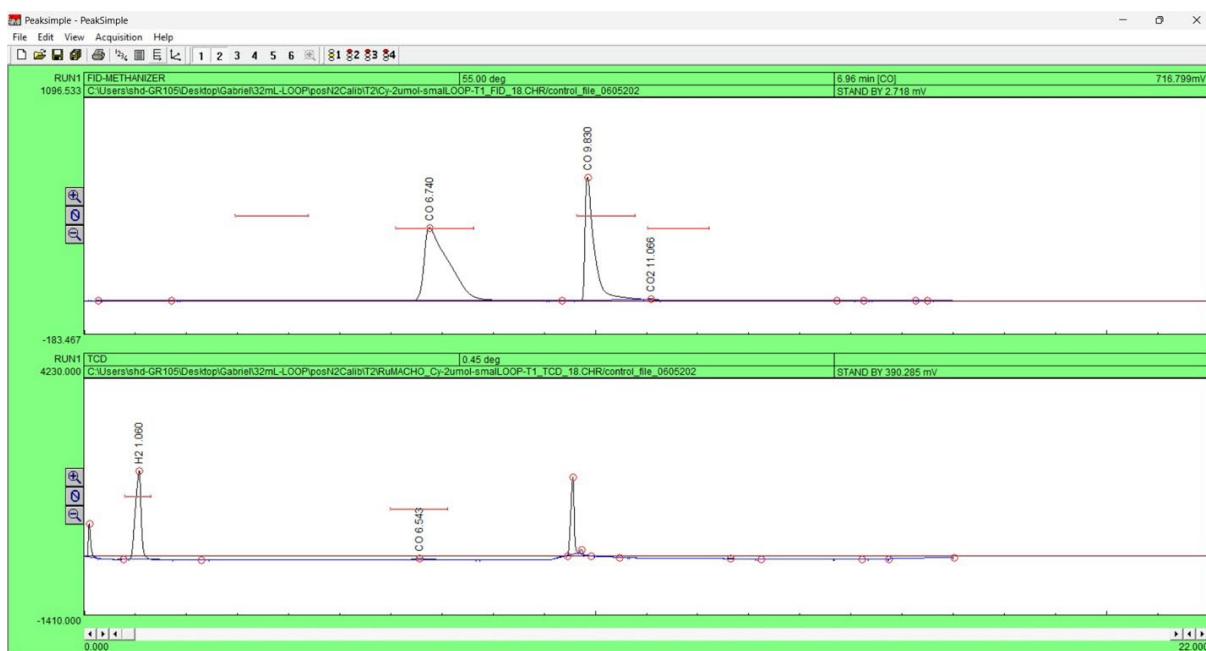

## Ru-MACHO<sup>Cy</sup> (4.5 μmol – 45 mL reactor)

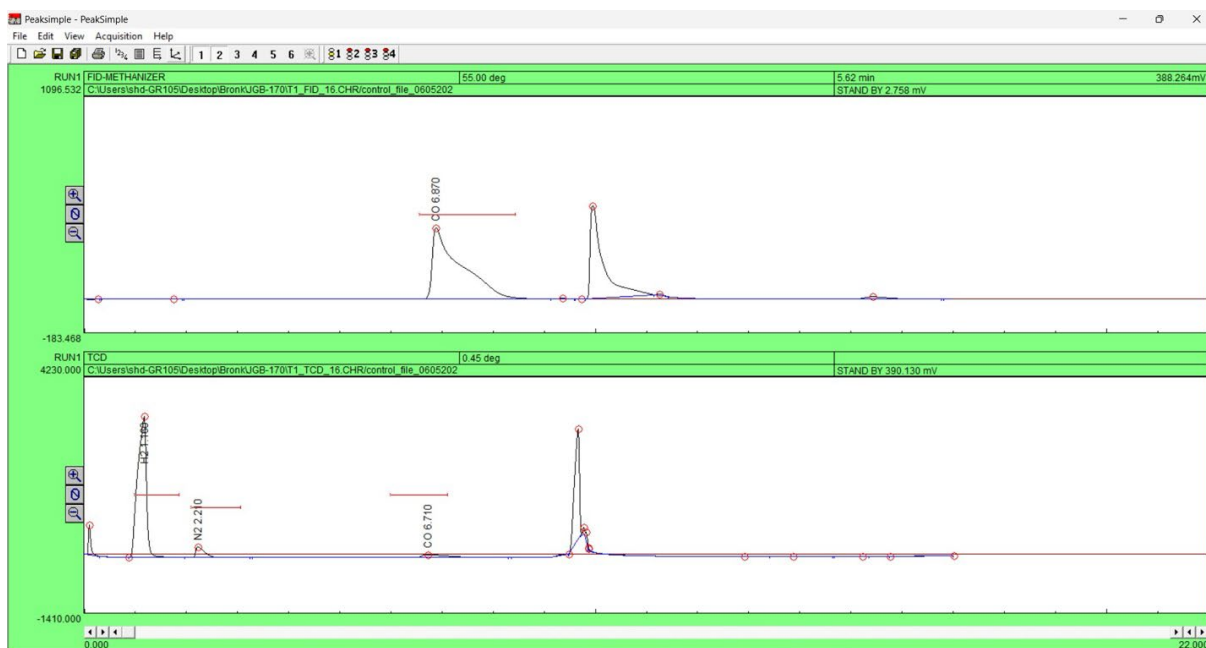

## Ru-MACHO<sup>Ad</sup>

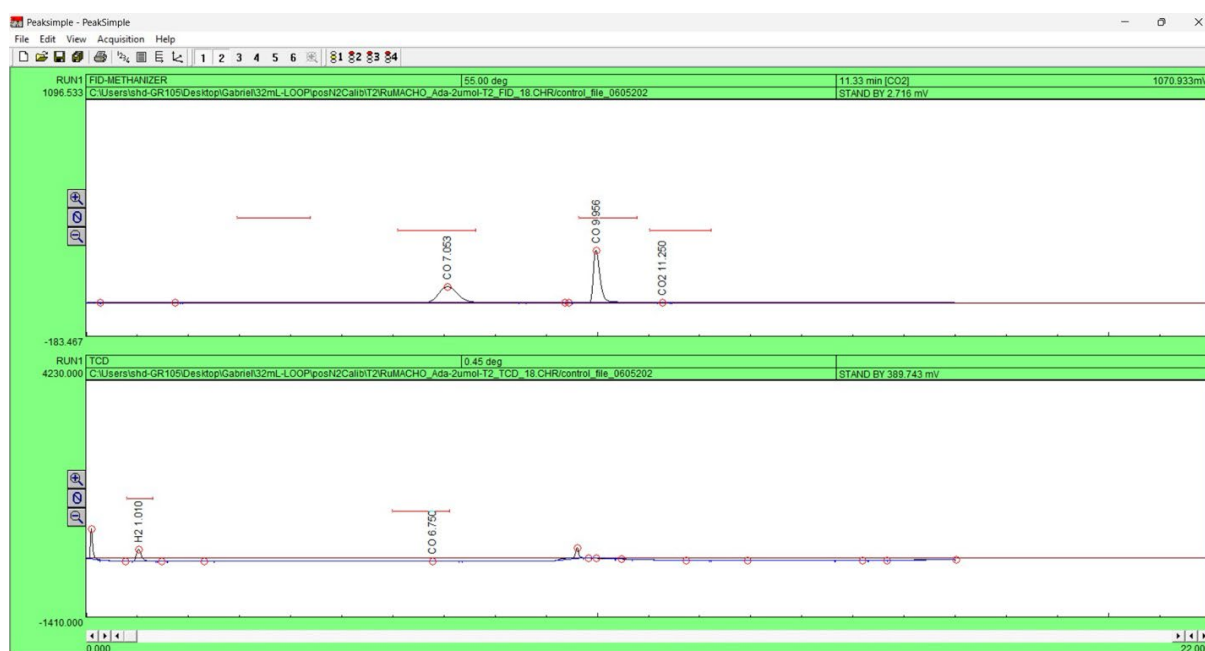

## Experiment with Addition of Pd/C

To probe whether hydrogenation of the proposed Ru-enamido complex **C5** could occur under the reaction conditions, Pd/C was introduced into the flow system. The reaction was performed according to the General Procedure for Ru-MACHO Catalyst Scope, with the modification that Pd/C (8.0 mg) was added directly to the gas–liquid separator.

**Table S10.** Summary of results for Ru-MACHO<sup>Ph</sup> (2.0  $\mu\text{mol}$ ) with addition of Pd/C (8.0 mg).

| Time<br>[min] | TOF [ $\text{h}^{-1}$ ] |      | Ratio<br>( $\text{H}_2/\text{CO}$ ) |
|---------------|-------------------------|------|-------------------------------------|
|               | $\text{H}_2$            | CO   |                                     |
| 0             | 6369                    | 1131 | 5.63                                |
| 20            | 7252                    | 3070 | 2.36                                |
| 40            | 6358                    | 3021 | 2.10                                |
| 60            | 6053                    | 2944 | 2.06                                |
| 80            | 5499                    | 2668 | 2.06                                |
| 100           | 4990                    | 2468 | 2.02                                |
| 120           | 4589                    | 2274 | 2.02                                |
| 140           | 3977                    | 1963 | 2.03                                |
| 160           | 3749                    | 1871 | 2.00                                |
| 180           | 3205                    | 1592 | 2.01                                |
| 200           | 3044                    | 1522 | 2.00                                |
| 220           | 2692                    | 1332 | 2.02                                |
| 240           | 2535                    | 1279 | 1.98                                |
| 260           | 2133                    | 1057 | 2.02                                |
| 280           | 2027                    | 1012 | 2.00                                |
| 300           | 1772                    | 867  | 2.04                                |
| 320           | 1683                    | 833  | 2.02                                |
| 340           | 1548                    | 767  | 2.02                                |
| 360           | 1392                    | 706  | 1.97                                |

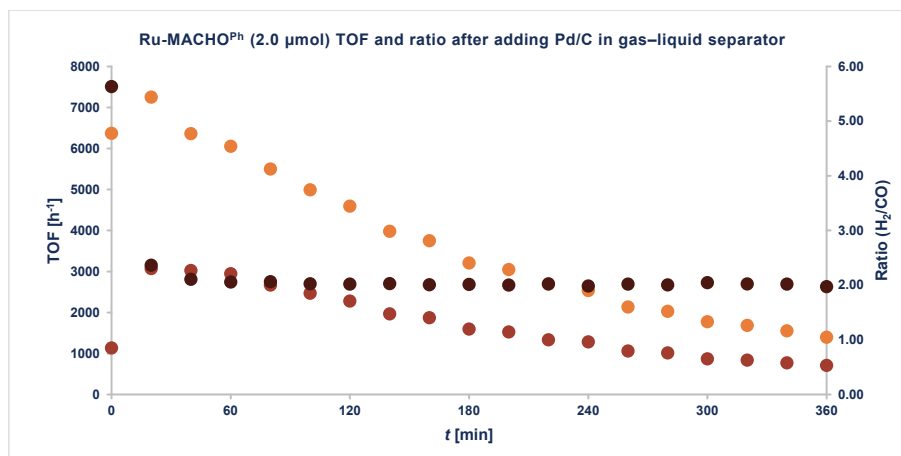

### Experiment using Ru-NP<sub>3</sub>

The reaction was performed according to the General Procedure for Ru-MACHO Catalyst Scope, with the modification of; inside a glovebox, Ru-NP<sub>3</sub> (2.0 μmol) was weighed into an 8 mL vial. Benzene (1 mL) and methanol (1 mL) were added, and the vial was sealed and heated to 80 °C until a clear solution was obtained (5 minutes). The resulting solution was transferred to a 20 mL GL-45 bottle (Bottle A), the vial rinsed with methanol (3 x 1 mL) and the GL-45 bottle diluted with methanol (9 mL).

**Table S11.** Summary of results for Ru-NP<sub>3</sub> (2.0 μmol).

| Time<br>[min] | TOF [h <sup>-1</sup> ] |    | Ratio<br>(H <sub>2</sub> /CO) |
|---------------|------------------------|----|-------------------------------|
|               | H <sub>2</sub>         | CO |                               |
| 0             | 1488                   | 1  | 1148.28                       |
| 20            | 2422                   | 6  | 381.52                        |
| 40            | 2931                   | 12 | 239.16                        |
| 60            | 3275                   | 19 | 175.01                        |
| 80            | 3427                   | 24 | 140.95                        |
| 100           | 3578                   | 31 | 114.44                        |
| 120           | 3514                   | 35 | 99.91                         |
| 140           | 3586                   | 41 | 86.54                         |
| 160           | 3387                   | 43 | 79.25                         |
| 180           | 3323                   | 46 | 71.75                         |
| 200           | 3147                   | 47 | 66.83                         |
| 220           | 3088                   | 50 | 61.67                         |
| 240           | 2993                   | 52 | 57.86                         |
| 260           | 2763                   | 50 | 54.78                         |
| 280           | 2678                   | 52 | 51.81                         |
| 300           | 2500                   | 50 | 49.71                         |
| 320           | 2387                   | 50 | 47.31                         |
| 340           | 2271                   | 50 | 45.36                         |
| 360           | 2139                   | 49 | 44.08                         |

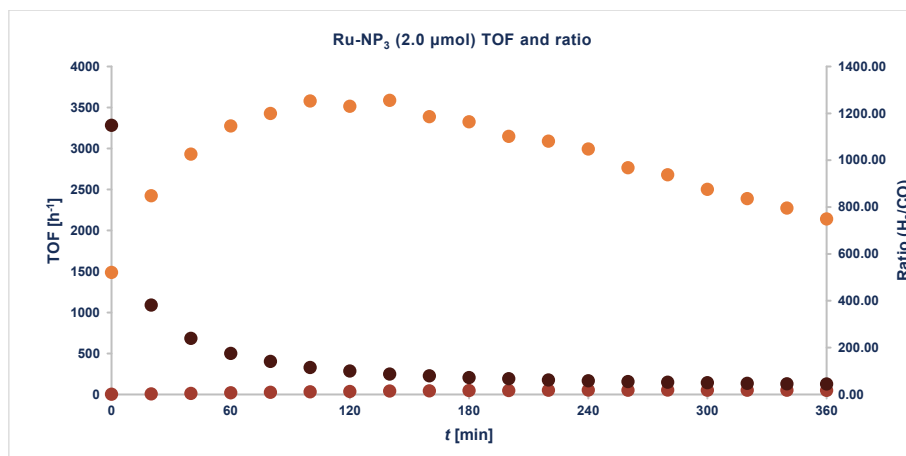

## Upscaling Using Ru-MACHO<sup>Cy</sup>

### Software for addition of consumed methanol

During extended continuous-flow experiments, progressive methanol conversion leads to changes in catalyst concentration and, ultimately, depletion of the recirculating reservoir. Loss of liquid volume interrupts recirculation and causes cessation of syngas production. To maintain stable operating conditions, an automated feedback script was developed to continuously adjust methanol feed during operation.

The program reads GC output files generated during online analysis, extracts peak areas for H<sub>2</sub>, CO, and the internal standard (N<sub>2</sub>), and converts these values into gas flow rates using pre-determined calibration functions. From the measured CO production rate, methanol consumption is calculated stoichiometrically, while additional methanol loss due to evaporation is estimated using an Antoine-equation-based vapor pressure model. The required methanol replenishment rate is then calculated and transmitted to a second HPLC pump via serial communication.

The script operates continuously during reaction monitoring. After each completed GC run, the program automatically updates the methanol feed rate to compensate for both chemical conversion and evaporative losses, thereby maintaining constant reactor volume and catalyst concentration throughout long-time experiments. The fully annotated source code is available at: <https://github.com/gabrielmfb/Methanol-to-syngas/>

### Inline-GC calibration using N<sub>2</sub>

Upon scaling up the reactor system, additional minor peaks appeared in the GC chromatograms, necessitating recalibration using N<sub>2</sub> as an internal standard. Calibration of the inline GC instrument (SRI Multiple Gas Analyzer #5) was performed by mixing pure gases from high-pressure cylinders delivered through mass-flow controllers. The gas streams were thoroughly mixed under stirring prior to entering the GC. For each calibration point, an average of four measurements was collected, with a maximum deviation of 5% between the lowest and highest values. For this internal-standard calibration at higher gas concentrations, all components were analysed using the TCD detector.

Given the internal standard calibration relationship:

$$RF = \frac{A_X \cdot C_{N_2}}{C_X \cdot A_{N_2}}$$

Where RF is the detector response factor,  $A_X$  and  $A_{N_2}$  are the chromatographic peak areas of analyte X and nitrogen (internal standard), respectively, and  $C_X$  and  $C_{N_2}$  are their molar concentrations. Rearranging gives:

$$\frac{A_X}{A_{N_2}} = RF \cdot \frac{C_X}{C_{N_2}}$$

The molar concentration of each component in the gas mixture is defined as:

$$C_X = \frac{n_X}{n_{total}}$$

And therefore:

$$\frac{C_X}{C_{N_2}} = \frac{\frac{n_X}{n_{total}}}{\frac{n_{N_2}}{n_{total}}} = \frac{n_X}{n_{N_2}}$$

Because all gases are introduced under identical temperature and pressure conditions, the molar amount of each component is proportional to its volumetric flow rate according to the ideal gas law:

$$n_X \propto V_X$$

therefore:

$$\frac{C_X}{C_{N_2}} = \frac{V_X}{V_{N_2}}$$

and the calibration expression becomes:

$$\frac{A_X}{A_{N_2}} = RF \cdot \frac{V_X}{V_{N_2}}$$

Accordingly, calibration curves were constructed by plotting the peak-area ratio ( $A_X/A_{N_2}$ ) against the volumetric flow ratio ( $V_X/V_{N_2}$ ).

**Table S12.** TCD calibration data for hydrogen.

| # | H <sub>2</sub> [mL/min] | Areas |       |       |       | Avg. area | SD     | CV  |
|---|-------------------------|-------|-------|-------|-------|-----------|--------|-----|
| 1 | 1.79                    | 18314 | 18678 | 18918 | 19045 | 18739     | 321.5  | 1.7 |
| 2 | 4.00                    | 28622 | 28671 | 28657 | 28665 | 28654     | 21.93  | 0.1 |
| 3 | 7.00                    | 34297 | 34052 | 34048 | 34109 | 34127     | 117.03 | 0.3 |
| 4 | 2.00                    | 15360 | 15519 | 15531 | 15535 | 15486     | 84.44  | 0.5 |
| 5 | 10.00                   | 37237 | 37449 | 37472 | 37526 | 37421     | 126.94 | 0.3 |
| 6 | 14.00                   | 41984 | 41443 | 41723 | 41380 | 41632     | 277.73 | 0.7 |
| 7 | 18.00                   | 43618 | 44340 | 44300 | 44336 | 44149     | 354.12 | 0.8 |

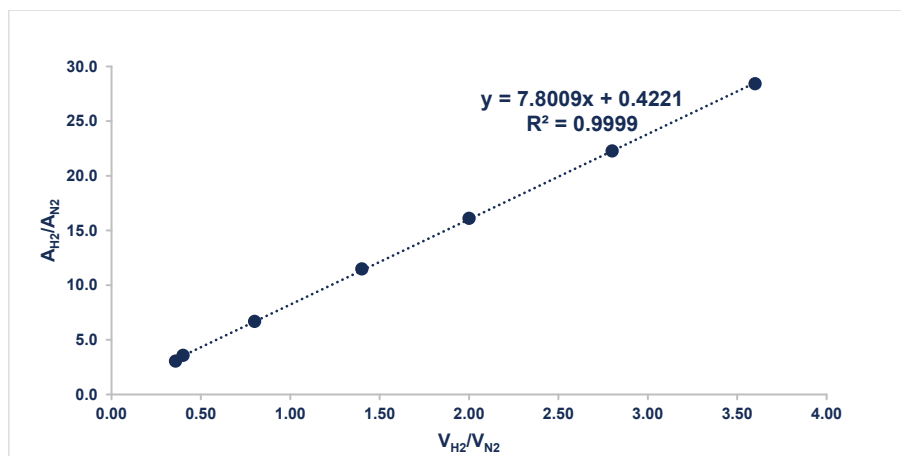

Table S13. TCD calibration data for carbon monoxide.

| # | CO [mL/min] | Areas |      |      |      | Avg. area | SD    | CV  |
|---|-------------|-------|------|------|------|-----------|-------|-----|
| 1 | 0.89        | 1106  | 1102 | 1101 | 1106 | 1104      | 2.28  | 0.2 |
| 2 | 2.00        | 1709  | 1715 | 1711 | 1714 | 1712      | 2.75  | 0.2 |
| 3 | 4.00        | 2342  | 2352 | 2353 | 2358 | 2352      | 6.24  | 0.3 |
| 4 | 4.00        | 3476  | 3508 | 3500 | 3499 | 3496      | 13.77 | 0.4 |
| 5 | 5.50        | 2512  | 2530 | 2526 | 2529 | 2524      | 8.34  | 0.3 |
| 6 | 6.50        | 2416  | 2380 | 2384 | 2374 | 2389      | 18.79 | 0.8 |
| 7 | 7.50        | 2154  | 2280 | 2284 | 2284 | 2251      | 64.36 | 2.9 |

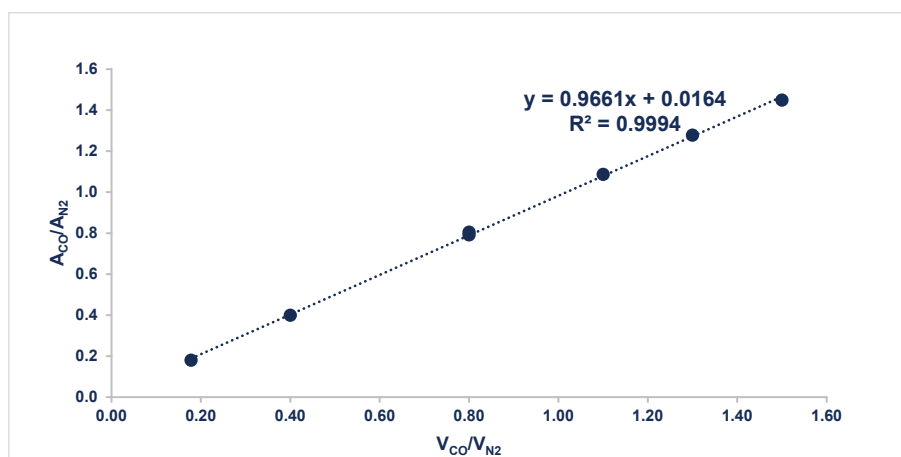

Table S14. TCD calibration data for nitrogen.

| # | N <sub>2</sub> [mL/min] | Areas |      |      |      | Avg. area | SD    | CV  |
|---|-------------------------|-------|------|------|------|-----------|-------|-----|
| 1 | 5.0                     | 6180  | 6146 | 6139 | 6128 | 6148      | 22.4  | 0.4 |
| 2 | 5.0                     | 4297  | 4299 | 4282 | 4292 | 4293      | 7.59  | 0.2 |
| 3 | 5.0                     | 2973  | 2975 | 2971 | 2972 | 2973      | 1.71  | 0.1 |
| 4 | 5.0                     | 4318  | 4349 | 4356 | 4356 | 4345      | 18.14 | 0.4 |
| 5 | 5.0                     | 2317  | 2324 | 2326 | 2326 | 2323      | 4.27  | 0.2 |
| 6 | 5.0                     | 1881  | 1867 | 1866 | 1864 | 1870      | 7.77  | 0.4 |
| 7 | 5.0                     | 1534  | 1561 | 1559 | 1561 | 1554      | 13.20 | 0.8 |

### Design of Experiments optimisation of large scale setup

A small design of experiments optimisation focused on the two main parameters, flow rate and back-pressure, was performed to obtain the ideal conditions for operation with the larger reactor.

**Table S15.** Summary of results for the third DoE. Stability is given by percentage of CO production retainment from peak production. <sup>[a]</sup>Not determined as CO production was still increasing after 3 h.

| # | Flow rate  | BPR     | <i>n</i> [mmol] |       | TOF [h <sup>-1</sup> ] |      | Ratio (H <sub>2</sub> /CO) | Stability [%]      |
|---|------------|---------|-----------------|-------|------------------------|------|----------------------------|--------------------|
|   | [X mL/min] | [Y psi] | H <sub>2</sub>  | CO    | H <sub>2</sub>         | CO   |                            |                    |
| 1 | 6.8        | 75      | 88.26           | 42.47 | 6537                   | 3146 | 2.08                       | 73.5               |
| 2 | 2.2        | 75      | 69.36           | 33.25 | 5138                   | 2463 | 2.09                       | 78.8               |
| 3 | 1.0        | 100     | 11.31           | 3.89  | 838                    | 288  | 2.90                       | N/D <sup>[a]</sup> |
| 4 | 8.0        | 100     | 4.27            | 1.90  | 316                    | 141  | 2.25                       | N/D <sup>[a]</sup> |
| 5 | 4.5        | 100     | 20.02           | 9.23  | 1483                   | 683  | 2.17                       | N/D <sup>[a]</sup> |
| 6 | 2.5        | 75      | 72.01           | 34.48 | 5334                   | 2554 | 2.09                       | 80.0               |

### Ru-MACHO<sup>Cy</sup> large scale experiment

Inside a glovebox, a 20 mL GL-45 flask (bottle A) was charged with Ru-MACHO<sup>Cy</sup> (4.5 μmol) and diluted with methanol (3.6 mL), followed by the addition of *t*BuOK (11.2 mg, 100 μmol), followed by dilution with methanol to a total of volume of 8.6 mL. In addition, two additional 100 mL GL-45 flasks (bottle B) were charged with methanol (120 mL). All three bottles were capped and taken outside the glovebox.

Outside the glovebox, the flow system described above (Continuous Flow Setup) equipped with a back-pressure regulator (75 psi), was flushed with methanol (100 mL) into a waste container under air. The gas-tight GL-45 lid was then transferred to bottle B, and the flow system was flushed again into a waste container by disconnecting the returning line at the Y-connection, while being extensively degassed using argon. After flushing methanol (100 mL), the returning line was reconnected to the Y-connection, restoring the closed-loop flow system. Once flushing was complete and the flow system filled with methanol (36.4 mL), the gas-tight GL-45 lid was transferred to bottle A, and the flow system was operated for 6 minutes at a flow rate of 10.00 mL/min. After 6 minutes, the flow rate was adjusted to 3.30 mL/min, the mass flow controller changed to 5.00 mL/min, and the inline GC connected. Following an additional 6 minutes of operation under the desired conditions, the inline GC was started, and the composition of the produced syngas was measured at 20-minute intervals. After starting the GC, the software for addition of methanol was also started.

**Table S16.** Summary of results for Ru-MACHO<sup>Cy</sup> (4.5 μmol) scale-up experiment.

| Time [hours] | TOF [h <sup>-1</sup> ] |      | Ratio (H <sub>2</sub> /CO) | Time [hours] | TOF [h <sup>-1</sup> ] |      | Ratio (H <sub>2</sub> /CO) |
|--------------|------------------------|------|----------------------------|--------------|------------------------|------|----------------------------|
|              | H <sub>2</sub>         | CO   |                            |              | H <sub>2</sub>         | CO   |                            |
| 0.00         | 8226                   | 4060 | 2.03                       | 42.33        | 3112                   | 1487 | 2.09                       |
| 0.33         | 6568                   | 3297 | 1.99                       | 42.67        | 3128                   | 1512 | 2.07                       |
| 0.67         | 5615                   | 2926 | 1.92                       | 43.00        | 3083                   | 1494 | 2.06                       |
| 1.00         | 5473                   | 2847 | 1.92                       | 43.33        | 3123                   | 1519 | 2.06                       |
| 1.33         | 5177                   | 2660 | 1.95                       | 43.67        | 3056                   | 1475 | 2.07                       |
| 1.67         | 4916                   | 2502 | 1.96                       | 44.00        | 3097                   | 1497 | 2.07                       |
| 2.00         | 4706                   | 2365 | 1.99                       | 44.33        | 3035                   | 1472 | 2.06                       |
| 2.33         | 4479                   | 2201 | 2.03                       | 44.67        | 3084                   | 1481 | 2.08                       |
| 2.67         | 4457                   | 2204 | 2.02                       | 45.00        | 3053                   | 1487 | 2.05                       |
| 3.00         | 4478                   | 2213 | 2.02                       | 45.33        | 3018                   | 1466 | 2.06                       |
| 3.33         | 4327                   | 2134 | 2.03                       | 45.67        | 3007                   | 1460 | 2.06                       |
| 3.67         | 4281                   | 2090 | 2.05                       | 46.00        | 2976                   | 1444 | 2.06                       |
| 4.00         | 4362                   | 2157 | 2.02                       | 46.33        | 3025                   | 1450 | 2.09                       |
| 4.33         | 4452                   | 2165 | 2.06                       | 46.67        | 2941                   | 1421 | 2.07                       |
| 4.67         | 4479                   | 2176 | 2.06                       | 47.00        | 2966                   | 1435 | 2.07                       |

|              |      |      |      |              |      |      |      |
|--------------|------|------|------|--------------|------|------|------|
| <b>5.00</b>  | 4435 | 2181 | 2.03 | <b>47.33</b> | 2971 | 1427 | 2.08 |
| <b>5.33</b>  | 4515 | 2218 | 2.04 | <b>47.67</b> | 2975 | 1438 | 2.07 |
| <b>5.67</b>  | 4406 | 2175 | 2.03 | <b>48.00</b> | 2960 | 1426 | 2.08 |
| <b>6.00</b>  | 4493 | 2201 | 2.04 | <b>48.33</b> | 2944 | 1427 | 2.06 |
| <b>6.33</b>  | 4359 | 2149 | 2.03 | <b>48.67</b> | 2929 | 1379 | 2.12 |
| <b>6.67</b>  | 4274 | 2087 | 2.05 | <b>49.00</b> | 2899 | 1405 | 2.06 |
| <b>7.00</b>  | 4372 | 2157 | 2.03 | <b>49.33</b> | 2908 | 1403 | 2.07 |
| <b>7.33</b>  | 4263 | 2088 | 2.04 | <b>49.67</b> | 2937 | 1419 | 2.07 |
| <b>7.67</b>  | 4217 | 2074 | 2.03 | <b>50.00</b> | 2915 | 1417 | 2.06 |
| <b>8.00</b>  | 4287 | 2115 | 2.03 | <b>50.33</b> | 2877 | 1392 | 2.07 |
| <b>8.33</b>  | 4119 | 1970 | 2.09 | <b>50.67</b> | 2893 | 1401 | 2.07 |
| <b>8.67</b>  | 4097 | 1986 | 2.06 | <b>51.00</b> | 2858 | 1389 | 2.06 |
| <b>9.00</b>  | 4197 | 2061 | 2.04 | <b>51.33</b> | 2837 | 1366 | 2.08 |
| <b>9.33</b>  | 4162 | 2024 | 2.06 | <b>51.67</b> | 2850 | 1375 | 2.07 |
| <b>9.67</b>  | 4083 | 1989 | 2.05 | <b>52.00</b> | 2810 | 1358 | 2.07 |
| <b>10.00</b> | 4096 | 1995 | 2.05 | <b>52.33</b> | 2843 | 1370 | 2.08 |
| <b>10.33</b> | 4119 | 1966 | 2.10 | <b>52.67</b> | 2780 | 1339 | 2.08 |
| <b>10.67</b> | 4159 | 2027 | 2.05 | <b>53.00</b> | 2854 | 1375 | 2.07 |
| <b>11.00</b> | 4129 | 2019 | 2.05 | <b>53.33</b> | 2778 | 1346 | 2.06 |
| <b>11.33</b> | 4085 | 1993 | 2.05 | <b>53.67</b> | 2812 | 1353 | 2.08 |
| <b>11.67</b> | 4042 | 1975 | 2.05 | <b>54.00</b> | 2831 | 1364 | 2.08 |
| <b>12.00</b> | 4077 | 1994 | 2.05 | <b>54.33</b> | 2769 | 1340 | 2.07 |
| <b>12.33</b> | 3994 | 1942 | 2.06 | <b>54.67</b> | 2768 | 1328 | 2.08 |
| <b>12.67</b> | 3960 | 1923 | 2.06 | <b>55.00</b> | 2751 | 1326 | 2.08 |
| <b>13.00</b> | 4037 | 1959 | 2.06 | <b>55.33</b> | 2753 | 1310 | 2.10 |
| <b>13.33</b> | 4024 | 1948 | 2.07 | <b>55.67</b> | 2774 | 1339 | 2.07 |
| <b>13.67</b> | 3952 | 1926 | 2.05 | <b>56.00</b> | 2747 | 1322 | 2.08 |
| <b>14.00</b> | 4013 | 1963 | 2.04 | <b>56.33</b> | 2707 | 1314 | 2.06 |
| <b>14.33</b> | 3927 | 1911 | 2.05 | <b>56.67</b> | 2733 | 1320 | 2.07 |
| <b>14.67</b> | 3945 | 1931 | 2.04 | <b>57.00</b> | 2706 | 1302 | 2.08 |
| <b>15.00</b> | 3938 | 1915 | 2.06 | <b>57.33</b> | 2702 | 1304 | 2.07 |
| <b>15.33</b> | 3900 | 1897 | 2.06 | <b>57.67</b> | 2675 | 1302 | 2.05 |
| <b>15.67</b> | 3851 | 1866 | 2.06 | <b>58.00</b> | 2643 | 1274 | 2.07 |
| <b>16.00</b> | 3959 | 1931 | 2.05 | <b>58.33</b> | 2663 | 1282 | 2.08 |
| <b>16.33</b> | 3850 | 1878 | 2.05 | <b>58.67</b> | 2656 | 1279 | 2.08 |
| <b>16.67</b> | 3875 | 1896 | 2.04 | <b>59.00</b> | 2630 | 1263 | 2.08 |
| <b>17.00</b> | 3765 | 1813 | 2.08 | <b>59.33</b> | 2675 | 1298 | 2.06 |
| <b>17.33</b> | 3694 | 1802 | 2.05 | <b>59.67</b> | 2619 | 1266 | 2.07 |
| <b>17.67</b> | 3757 | 1845 | 2.04 | <b>60.00</b> | 2639 | 1270 | 2.08 |
| <b>18.00</b> | 3664 | 1780 | 2.06 | <b>60.33</b> | 2649 | 1279 | 2.07 |
| <b>18.33</b> | 3739 | 1835 | 2.04 | <b>60.67</b> | 2586 | 1252 | 2.07 |
| <b>18.67</b> | 3681 | 1796 | 2.05 | <b>61.00</b> | 2613 | 1259 | 2.08 |
| <b>19.00</b> | 3665 | 1743 | 2.10 | <b>61.33</b> | 2613 | 1260 | 2.07 |
| <b>19.33</b> | 3740 | 1824 | 2.05 | <b>61.67</b> | 2561 | 1236 | 2.07 |
| <b>19.67</b> | 3603 | 1753 | 2.05 | <b>62.00</b> | 2572 | 1238 | 2.08 |
| <b>20.00</b> | 3696 | 1800 | 2.05 | <b>62.33</b> | 2573 | 1236 | 2.08 |
| <b>20.33</b> | 3677 | 1801 | 2.04 | <b>62.67</b> | 2586 | 1239 | 2.09 |
| <b>20.67</b> | 3531 | 1726 | 2.05 | <b>63.00</b> | 2585 | 1249 | 2.07 |

|              |      |      |      |              |      |      |      |
|--------------|------|------|------|--------------|------|------|------|
| <b>21.00</b> | 3592 | 1756 | 2.05 | <b>63.33</b> | 2541 | 1222 | 2.08 |
| <b>21.33</b> | 3560 | 1734 | 2.05 | <b>63.67</b> | 2577 | 1243 | 2.07 |
| <b>21.67</b> | 3519 | 1705 | 2.06 | <b>64.00</b> | 2526 | 1194 | 2.12 |
| <b>22.00</b> | 3498 | 1701 | 2.06 | <b>64.33</b> | 2563 | 1238 | 2.07 |
| <b>22.33</b> | 3586 | 1738 | 2.06 | <b>64.67</b> | 2517 | 1205 | 2.09 |
| <b>22.67</b> | 3521 | 1714 | 2.05 | <b>65.00</b> | 2536 | 1221 | 2.08 |
| <b>23.00</b> | 3590 | 1746 | 2.06 | <b>65.33</b> | 2531 | 1216 | 2.08 |
| <b>23.33</b> | 3487 | 1696 | 2.06 | <b>65.67</b> | 2511 | 1204 | 2.09 |
| <b>23.67</b> | 3617 | 1762 | 2.05 | <b>66.00</b> | 2525 | 1194 | 2.12 |
| <b>24.00</b> | 3442 | 1689 | 2.04 | <b>66.33</b> | 2486 | 1197 | 2.08 |
| <b>24.33</b> | 3502 | 1702 | 2.06 | <b>66.67</b> | 2520 | 1219 | 2.07 |
| <b>24.67</b> | 3426 | 1668 | 2.05 | <b>67.00</b> | 2481 | 1188 | 2.09 |
| <b>25.00</b> | 3531 | 1715 | 2.06 | <b>67.33</b> | 2526 | 1225 | 2.06 |
| <b>25.33</b> | 3471 | 1677 | 2.07 | <b>67.67</b> | 2452 | 1179 | 2.08 |
| <b>25.67</b> | 3454 | 1680 | 2.06 | <b>68.00</b> | 2485 | 1198 | 2.07 |
| <b>26.00</b> | 3512 | 1706 | 2.06 | <b>68.33</b> | 2456 | 1176 | 2.09 |
| <b>26.33</b> | 3480 | 1680 | 2.07 | <b>68.67</b> | 2469 | 1183 | 2.09 |
| <b>26.67</b> | 3491 | 1696 | 2.06 | <b>69.00</b> | 2461 | 1187 | 2.07 |
| <b>27.00</b> | 3416 | 1661 | 2.06 | <b>69.33</b> | 2470 | 1185 | 2.08 |
| <b>27.33</b> | 3470 | 1701 | 2.04 | <b>69.67</b> | 2449 | 1183 | 2.07 |
| <b>27.67</b> | 3437 | 1666 | 2.06 | <b>70.00</b> | 2440 | 1171 | 2.08 |
| <b>28.00</b> | 3445 | 1664 | 2.07 | <b>70.33</b> | 2471 | 1184 | 2.09 |
| <b>28.33</b> | 3378 | 1636 | 2.06 | <b>70.67</b> | 2440 | 1172 | 2.08 |
| <b>28.67</b> | 3440 | 1675 | 2.05 | <b>71.00</b> | 2437 | 1175 | 2.07 |
| <b>29.00</b> | 3404 | 1642 | 2.07 | <b>71.33</b> | 2430 | 1167 | 2.08 |
| <b>29.33</b> | 3385 | 1652 | 2.05 | <b>71.67</b> | 2447 | 1179 | 2.08 |
| <b>29.67</b> | 3434 | 1664 | 2.06 | <b>72.00</b> | 2430 | 1171 | 2.08 |
| <b>30.00</b> | 3393 | 1653 | 2.05 | <b>72.33</b> | 2437 | 1153 | 2.11 |
| <b>30.33</b> | 3439 | 1662 | 2.07 | <b>72.67</b> | 2397 | 1154 | 2.08 |
| <b>30.67</b> | 3421 | 1681 | 2.03 | <b>73.00</b> | 2413 | 1160 | 2.08 |
| <b>31.00</b> | 3424 | 1660 | 2.06 | <b>73.33</b> | 2409 | 1159 | 2.08 |
| <b>31.33</b> | 3329 | 1617 | 2.06 | <b>73.67</b> | 2427 | 1167 | 2.08 |
| <b>31.67</b> | 3377 | 1633 | 2.07 | <b>74.00</b> | 2388 | 1156 | 2.07 |
| <b>32.00</b> | 3312 | 1601 | 2.07 | <b>74.33</b> | 2396 | 1144 | 2.09 |
| <b>32.33</b> | 3391 | 1642 | 2.07 | <b>74.67</b> | 2411 | 1153 | 2.09 |
| <b>32.67</b> | 3319 | 1620 | 2.05 | <b>75.00</b> | 2388 | 1146 | 2.08 |
| <b>33.00</b> | 3358 | 1627 | 2.06 | <b>75.33</b> | 2380 | 1138 | 2.09 |
| <b>33.33</b> | 3286 | 1616 | 2.03 | <b>75.67</b> | 2391 | 1152 | 2.08 |
| <b>33.67</b> | 3322 | 1603 | 2.07 | <b>76.00</b> | 2389 | 1147 | 2.08 |
| <b>34.00</b> | 3280 | 1592 | 2.06 | <b>76.33</b> | 2362 | 1133 | 2.09 |
| <b>34.33</b> | 3263 | 1573 | 2.07 | <b>76.67</b> | 2366 | 1136 | 2.08 |
| <b>34.67</b> | 3276 | 1595 | 2.05 | <b>77.00</b> | 2332 | 1118 | 2.09 |
| <b>35.00</b> | 3341 | 1619 | 2.06 | <b>77.33</b> | 2348 | 1127 | 2.08 |
| <b>35.33</b> | 3323 | 1608 | 2.07 | <b>77.67</b> | 2299 | 1102 | 2.09 |
| <b>35.67</b> | 3249 | 1572 | 2.07 | <b>78.00</b> | 2301 | 1107 | 2.08 |
| <b>36.00</b> | 3340 | 1623 | 2.06 | <b>78.33</b> | 2309 | 1086 | 2.13 |
| <b>36.33</b> | 3243 | 1578 | 2.06 | <b>78.67</b> | 2309 | 1108 | 2.08 |
| <b>36.67</b> | 3251 | 1570 | 2.07 | <b>79.00</b> | 2306 | 1109 | 2.08 |

|              |      |      |      |              |      |      |      |
|--------------|------|------|------|--------------|------|------|------|
| <b>37.00</b> | 3276 | 1609 | 2.04 | <b>79.33</b> | 2287 | 1096 | 2.09 |
| <b>37.33</b> | 3186 | 1543 | 2.06 | <b>79.67</b> | 2295 | 1101 | 2.08 |
| <b>37.67</b> | 3263 | 1575 | 2.07 | <b>80.00</b> | 2306 | 1109 | 2.08 |
| <b>38.00</b> | 3247 | 1581 | 2.05 | <b>80.33</b> | 2273 | 1089 | 2.09 |
| <b>38.33</b> | 3240 | 1579 | 2.05 | <b>80.67</b> | 2297 | 1103 | 2.08 |
| <b>38.67</b> | 3167 | 1536 | 2.06 | <b>81.00</b> | 2267 | 1088 | 2.08 |
| <b>39.00</b> | 3212 | 1550 | 2.07 | <b>81.33</b> | 2240 | 1079 | 2.07 |
| <b>39.33</b> | 3212 | 1553 | 2.07 | <b>81.67</b> | 2278 | 1094 | 2.08 |
| <b>39.67</b> | 3146 | 1528 | 2.06 | <b>82.00</b> | 2263 | 1092 | 2.07 |
| <b>40.00</b> | 3170 | 1530 | 2.07 | <b>82.33</b> | 2223 | 1063 | 2.09 |
| <b>40.33</b> | 3185 | 1550 | 2.05 | <b>82.67</b> | 2234 | 1067 | 2.09 |
| <b>40.67</b> | 3144 | 1514 | 2.08 | <b>83.00</b> | 2225 | 1068 | 2.08 |
| <b>41.00</b> | 3130 | 1505 | 2.08 | <b>83.33</b> | 2215 | 1067 | 2.08 |
| <b>41.33</b> | 3190 | 1543 | 2.07 | <b>83.67</b> | 2211 | 1037 | 2.13 |
| <b>41.67</b> | 3109 | 1511 | 2.06 | <b>84.00</b> | 2225 | 1069 | 2.08 |
| <b>42.00</b> | 3134 | 1512 | 2.07 |              |      |      |      |

## Ligand and Complex Synthesis

### Ru-MACHO<sup>Ph</sup>

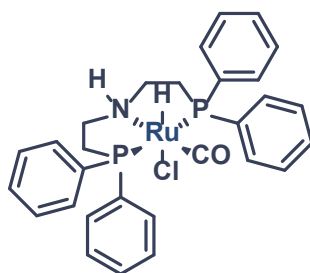

Inside a glovebox, to a COtube charged with MACHO<sup>Ph</sup> (239 mg, 542  $\mu\text{mol}$ ) was added carbonylchlorohydridotris(triphenylphosphine)ruthenium(II) (491 mg, 516  $\mu\text{mol}$ ) and toluene (6.0 mL). The reaction mixture was stirred at reflux for 5 h. After reaching ambient temperature, the reaction mixture was added pentane (30 mL) to precipitate out the complex. The suspension was sonicated for 30 minutes, centrifuged, and the solvent decanted off. The remaining solids were suspended in Et<sub>2</sub>O (20 mL) and sonicated for 30 minutes. The suspension was centrifuged, filtered, and the precipitate rinsed with Et<sub>2</sub>O (2 x 5 mL). The solids were collected and dried in vacuo overnight, affording Ru-MACHO<sup>Ph</sup> as a white solid (280 mg, 460  $\mu\text{mol}$ , 89%).

<sup>1</sup>H NMR (400 MHz, CD<sub>2</sub>Cl<sub>2</sub>)  $\delta$  7.85 – 7.76 (m, 8H), 7.43 – 7.40 (m, 12H), 3.95 – 3.90 (m, 1H), 3.49 – 3.36 (m, 2H), 3.01 – 2.96 (m, 2H), 2.57 – 2.44 (m, 4H), -14.48 (t,  $J$  = 20.1 Hz, 0.07H), -15.24 (t,  $J$  = 19.4 Hz, 0.93H). <sup>13</sup>C NMR (101 MHz, CD<sub>2</sub>Cl<sub>2</sub>)  $\delta$  207.1 (t,  $J$  = 12.2 Hz), 138.0 (t,  $J$  = 22.7 Hz), 134.7 (t,  $J$  = 21.1 Hz), 133.6 (t,  $J$  = 6.5 Hz), 132.6 (t,  $J$  = 6.6 Hz), 130.4, 130.3, 128.9 (t,  $J$  = 5.0 Hz), 128.7 (t,  $J$  = 5.0 Hz), 52.7 (t,  $J$  = 5.0 Hz), 32.0 (t,  $J$  = 11.4 Hz). <sup>31</sup>P NMR (162 MHz, CD<sub>2</sub>Cl<sub>2</sub>)  $\delta$  57.5 (0.14P), 54.9 (d,  $J$  = 4.4 Hz, 1.86P).

Spectroscopic data in agreement with that reported by Ogata, O. *et al.*<sup>1</sup>

## Bis(4-methylphenyl)phosphine

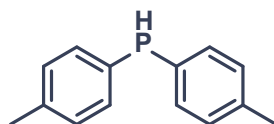

Inside a glovebox, a COtube charged with bis(4-methylphenyl)phosphine oxide (921 mg, 4.00 mmol) was added THF (12 mL) and subsequently cooled to -30 °C. DIBAL-H (1.0 M in hexanes, 14.0 mL, 14.0 mmol) was added dropwise to the cold solution over 5 minutes. Upon cessation of hydrogen evolution, the COtube was sealed and stirred at ambient temperature overnight. The reaction mixture was diluted with Et<sub>2</sub>O (10 mL) and subsequently quenched with a saturated aqueous solution of Rochelle's salt (29 mL). The resultant biphasic mixture was stirred for 1 h, after which the organic layer was separated, and the aqueous phase was extracted with Et<sub>2</sub>O (2 x 10 mL). The combined organic phases were dried over anhydrous MgSO<sub>4</sub>, filtered, and concentrated. The resultant cloudy liquid was re-dissolved in Et<sub>2</sub>O (5 mL) and passed through a short column of basic alumina, eluting with Et<sub>2</sub>O (3 x 5 mL). Subsequent removal of the solvent under reduced pressure afforded bis(4-methylphenyl)phosphine as a colourless oil (735 mg, 3.43 mmol, 86%).

<sup>1</sup>H NMR (400 MHz, CD<sub>3</sub>CN) δ 7.39 – 7.35 (m, 4H), 7.17 – 7.15 (m, 4H), 5.14 (d, *J* = 218.7 Hz, 1H), 2.30 (s, 6H). <sup>13</sup>C NMR (101 MHz, CD<sub>3</sub>CN) δ 139.6, 134.7 (d, *J* = 17.0 Hz), 132.6 (d, *J* = 9.1 Hz), 130.3 (d, *J* = 6.5 Hz), 21.2. <sup>31</sup>P NMR (162 MHz, CD<sub>3</sub>CN) δ -42.7.

Spectroscopic data in agreement with that reported by Webster, R. L. *et al.*<sup>2</sup>

## Bis(2-(bis(4-methylphenyl)phosphaneyl)ethyl)amine, MACHO<sup>p(Me)</sup>

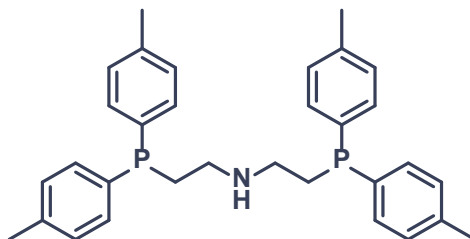

Inside a glovebox, a COtube charged with bis(4-methylphenyl)phosphine (735 mg, 3.43 mmol) was added THF (10 mL) and *t*BuOK (1.05 g, 9.36 mmol). The resultant deep red solution was stirred at ambient temperature for 15 minutes prior to the addition of bis(2-chloroethyl)amine hydrochloride (278 mg, 1.56 mmol). The COtube was sealed, and the reaction mixture was refluxed overnight. After reaching ambient temperature, the reaction mixture was diluted with Et<sub>2</sub>O (10 mL) and subsequently quenched with water (10 mL). The organic layer was separated, and the aqueous phase was extracted with Et<sub>2</sub>O (2 x 10 mL). The combined organic phases were dried over anhydrous Na<sub>2</sub>SO<sub>4</sub>, filtered, and concentrated. Outside the glovebox, purification via AFCC using degassed solvents (heptane to heptane/EtOAc 1:3) afforded MACHO<sup>p(Me)</sup> as a colourless oil (397 mg, 797 μmol, 51%). The compound was immediately transferred back into the glovebox after isolation.

<sup>1</sup>H NMR (400 MHz, CDCl<sub>3</sub>) δ 7.33 – 7.29 (m, 8H), 7.15 – 7.13 (m, 8H), 2.74 – 2.68 (m, 4H), 2.34 (s, 12H), 2.21 – 2.17 (m, 4H). <sup>13</sup>C NMR (101 MHz, CDCl<sub>3</sub>) δ 138.6, 135.1 (d, *J* = 11.3 Hz), 132.7 (d, *J* = 19.0 Hz), 129.4 (d, *J* = 7.0 Hz), 46.5 (d, *J* = 20.9 Hz), 29.2 (d, *J* = 11.6 Hz), 21.4. <sup>31</sup>P NMR (162 MHz, CDCl<sub>3</sub>) δ -22.7.

Spectroscopic data in agreement with that reported by Liu, W. *et al.*<sup>3</sup>

## Ru-MACHO<sup>p(Me)</sup>

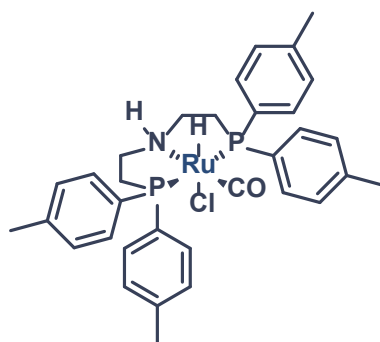

Inside a glovebox, to a COtube charged with MACHO<sup>p(Me)</sup> (396 mg, 796  $\mu\text{mol}$ ) was added carbonylchlorohydridotris(triphenylphosphine)ruthenium(II) (721 mg, 758  $\mu\text{mol}$ ) and toluene (10 mL). The reaction mixture was stirred at reflux for 5 h. After reaching ambient temperature, the reaction mixture was concentrated under reduced pressure followed by the addition of Et<sub>2</sub>O (10 mL) to precipitate out the complex. The suspension was sonicated for 30 minutes, centrifuged, and the solvent decanted off. The remaining solids were suspended in Et<sub>2</sub>O (10 mL) and sonicated for 30 minutes. The suspension was centrifuged, filtered, and the precipitate rinsed with Et<sub>2</sub>O (2 x 5 mL). The solids were collected and dried in vacuo overnight, affording Ru-MACHO<sup>p(Me)</sup> as a white solid (425 mg, 642  $\mu\text{mol}$ , 85%).

**<sup>1</sup>H NMR** (400 MHz, C<sub>6</sub>D<sub>6</sub>)  $\delta$  8.12 – 8.08 (m, 4H), 7.78 – 7.74 (m, 4H), 7.02 (d,  $J$  = 7.7 Hz, 4H), 6.85 (d,  $J$  = 7.7 Hz, 4H), 4.63 – 4.58 (m, 1H), 2.87 – 2.75 (m, 2H), 2.48 – 2.46 (m, 2H), 2.41 – 2.32 (m, 2H), 2.06 – 1.95 (m, 14H), -14.82 (t,  $J$  = 19.7 Hz, 1H). **<sup>13</sup>C NMR** (101 MHz, C<sub>6</sub>D<sub>6</sub>)  $\delta$  207.8 (t,  $J$  = 12.1 Hz), 139.8, 139.5, 136.1 (t,  $J$  = 23.3 Hz), 134.3 (t,  $J$  = 6.6 Hz), 132.6 (t,  $J$  = 6.6 Hz), 132.3 (t,  $J$  = 21.7 Hz), 129.4 (t,  $J$  = 5.0 Hz), 129.2 (t,  $J$  = 5.1 Hz), 52.4 (t,  $J$  = 4.5 Hz), 32.3 (t,  $J$  = 11.3 Hz), 21.3, 21.1. **<sup>31</sup>P NMR** (162 MHz, C<sub>6</sub>D<sub>6</sub>)  $\delta$  50.8 (d,  $J$  = 2.9 Hz). **HRMS** (ESI<sup>+</sup>)  $m/z$ : Calcd for C<sub>33</sub>H<sub>38</sub>NO<sub>2</sub>Ru [M - Cl]<sup>+</sup> 628.1467; Found 628.1490.

Spectroscopic data in agreement with that reported by Ogata, O. *et al.*<sup>1</sup>

## Bis(3,5-dimethylphenyl)phosphine

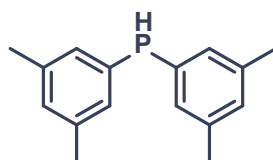

Inside a glovebox, a COtube charged with bis(3,5-dimethylphenyl)phosphine oxide (1.03 g, 4.00 mmol) was added THF (12 mL) and subsequently cooled to -30 °C. DIBAL-H (1.0 M in hexanes, 14.0 mL, 14.0 mmol) was added dropwise to the cold solution over 5 minutes. Upon cessation of hydrogen evolution, the COtube was sealed and stirred at ambient temperature overnight. The reaction mixture was diluted with Et<sub>2</sub>O (10 mL) and subsequently quenched with a saturated aqueous solution of Rochelle's salt (29 mL). The resultant biphasic mixture was stirred for 1 h, after which the organic layer was separated, and the aqueous phase was extracted with Et<sub>2</sub>O (2 x 10 mL). The combined organic phases were dried over anhydrous MgSO<sub>4</sub>, filtered, and concentrated. The resultant cloudy liquid was re-dissolved in Et<sub>2</sub>O (5 mL) and passed through a short column of basic alumina, eluting with Et<sub>2</sub>O (3 x 5 mL). Subsequent removal of the solvent under reduced pressure afforded bis(3,5-dimethylphenyl)phosphine as a colourless oil (922 mg, 3.81 mmol, 95%).

$^1\text{H NMR}$  (400 MHz,  $\text{C}_6\text{D}_6$ )  $\delta$  7.22 (d,  $J = 7.8$  Hz, 4H), 6.70 (s, 2H), 5.32 (d,  $J = 215.0$  Hz, 1H), 2.02 (s, 12H).  $^{13}\text{C NMR}$  (101 MHz,  $\text{C}_6\text{D}_6$ )  $\delta$  138.2 (d,  $J = 6.6$  Hz), 135.4 (d,  $J = 10.3$  Hz), 132.3 (d,  $J = 16.9$  Hz), 130.5, 21.2.  $^{31}\text{P NMR}$  (162 MHz,  $\text{C}_6\text{D}_6$ )  $\delta$  -39.9.

Spectroscopic data in agreement with that reported by Selke, R. *et al.*<sup>4</sup>

#### Bis(2-(bis(3,5-dimethylphenyl)phosphaneyl)ethyl)amine, MACHO<sup>m,m(Me)</sup>

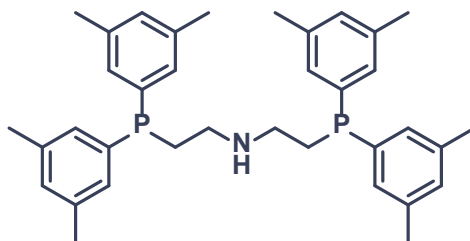

Inside a glovebox, a COtube charged with bis(3,5-dimethylphenyl)phosphine (922 mg, 3.81 mmol) was added THF (10 mL) and *t*BuOK (1.17 g, 10.4 mmol). The resultant deep red solution was stirred at ambient temperature for 15 minutes prior to the addition of bis(2-chloroethyl)amine hydrochloride (309 mg, 1.73 mmol). The COtube was sealed, and the reaction mixture was refluxed overnight. After reaching ambient temperature, the reaction mixture was diluted with  $\text{Et}_2\text{O}$  (10 mL) and subsequently quenched with water (10 mL). The organic layer was separated, and the aqueous phase was extracted with  $\text{Et}_2\text{O}$  (2 x 10 mL). The combined organic phases were dried over anhydrous  $\text{Na}_2\text{SO}_4$ , filtered, and concentrated. Outside the glovebox, purification via AFCC using degassed solvents (heptane to heptane/ $\text{EtOAc}$  1:3) afforded MACHO<sup>m,m(Me)</sup> as a colourless oil (374 mg, 675  $\mu\text{mol}$ , 39%). The compound was immediately transferred back into the glovebox after isolation.

$^1\text{H NMR}$  (400 MHz,  $\text{C}_7\text{D}_8$ )  $\delta$  7.20 (d,  $J = 7.6$  Hz, 8H), 6.71 (s, 4H), 2.77 – 2.71 (m, 4H), 2.23 – 2.19 (m, 4H), 2.08 (s, 24H).  $^{13}\text{C NMR}$  (101 MHz,  $\text{C}_7\text{D}_8$ )  $\delta$  139.7 (d,  $J = 13.9$  Hz), 137.8 (d,  $J = 6.9$  Hz), 130.9 (d,  $J = 19.0$  Hz), 130.5, 47.0 (d,  $J = 21.3$  Hz), 29.7 (d,  $J = 13.1$  Hz), 21.2.  $^{31}\text{P NMR}$  (162 MHz,  $\text{C}_7\text{D}_8$ )  $\delta$  -21.0.

Spectroscopic data in agreement with that reported by Ogata, O. *et al.*<sup>1</sup>

#### Ru-MACHO<sup>m,m(Me)</sup>

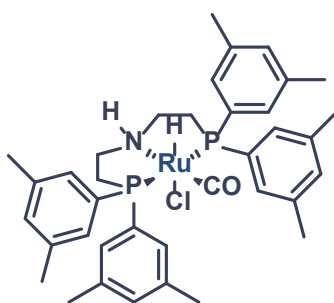

Inside a glovebox, to a COtube charged with MACHO<sup>m,m(Me)</sup> (373 mg, 674  $\mu\text{mol}$ ) was added carbonylchlorohydridotris(triphenylphosphine)ruthenium(II) (611 mg, 642  $\mu\text{mol}$ ) and toluene (10 mL). The reaction mixture was stirred at reflux for 5 h. After reaching ambient temperature, the reaction mixture was concentrated under reduced pressure followed by the addition of  $\text{Et}_2\text{O}$  (10 mL) to precipitate out the complex. The suspension was sonicated for 30 minutes, centrifuged, and the solvent decanted off. The remaining solids were suspended in  $\text{Et}_2\text{O}$  (10 mL) and sonicated for 30 minutes. The suspension was centrifuged, filtered, and the precipitate rinsed with  $\text{Et}_2\text{O}$  (2 x 5 mL). The solids were collected and dried in vacuo overnight, affording Ru-MACHO<sup>m,m(Me)</sup> as a white solid (371 mg, 517  $\mu\text{mol}$ , 81%).

**<sup>1</sup>H NMR** (400 MHz, C<sub>6</sub>D<sub>6</sub>) δ 7.94 – 7.91 (m, 4H), 7.66 – 7.64 (m, 4H), 6.73 (s, 2H), 6.63 (s, 2H), 5.03 – 4.98 (m, 1H), 3.05 – 2.93 (m, 2H), 2.61 – 2.58 (m, 2H), 2.53 – 2.45 (m, 2H), 2.20 – 2.08 (m, 14H), 1.97 (s, 12H), -14.72 (t, *J* = 19.6 Hz, 1H). **<sup>13</sup>C NMR** (101 MHz, C<sub>6</sub>D<sub>6</sub>) δ 208.2, 139.3 (t, *J* = 22.2 Hz), 138.0 (t, *J* = 5.1 Hz), 137.8 (t, *J* = 5.2 Hz), 135.6 (t, *J* = 20.5 Hz), 131.9, 131.8 (t, *J* = 6.5 Hz), 131.6, 130.3 (t, *J* = 6.4 Hz), 52.5 (t, *J* = 4.7 Hz), 32.1 (t, *J* = 11.1 Hz), 21.5, 21.3. **<sup>31</sup>P NMR** (162 MHz, C<sub>6</sub>D<sub>6</sub>) δ 52.1 (d, *J* = 3.9 Hz). **HRMS** (ESI<sup>+</sup>) *m/z* Calcd for C<sub>37</sub>H<sub>46</sub>NOP<sub>2</sub>Ru [M - Cl]<sup>+</sup> 684.2093; Found 684.2109.

Spectroscopic data in agreement with that reported by Ogata, O. *et al.*<sup>1</sup>

### Bis(4-isopropylphenyl)phosphine oxide

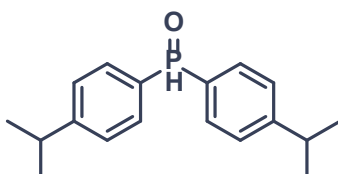

A round-bottomed flask charged with 1-bromo-4-isopropylbenzene (1.74 g, 8.75 mmol) was added THF (10 mL) and subsequently cooled to -78 °C, after which *t*BuLi (1.7 M in hexanes, 8.8 mL, 15 mmol) was added dropwise. The resultant mixture was stirred for 30 min prior to the addition of diethyl phosphate (345 mg, 2.50 mmol). The reaction mixture was stirred at -78 °C for 1 h before slowly warming to ambient temperature to be stirred overnight. The reaction mixture was diluted with DCM (30 mL) and subsequently quenched with a 1 M HCl (30 mL). The organic layer was separated, and the aqueous phase was extracted with DCM (2 x 30 mL). The combined organic phases were dried over anhydrous MgSO<sub>4</sub>, filtered, and concentrated. Purification via AFCC (heptane to heptane/EtOAc 1:1) afforded bis(4-isopropylphenyl)phosphine oxide as a white solid (605 mg, 2.11 mmol, 84%).

**<sup>1</sup>H NMR** (400 MHz, C<sub>6</sub>D<sub>6</sub>) δ 7.95 (d, *J* = 471.2 Hz, 1H), 7.61 – 7.56 (m, 4H), 6.96 – 6.94 (m, 4H), 2.55 (sept, *J* = 6.9 Hz, 2H), 1.0 (d, *J* = 7.0 Hz, 12H). **<sup>13</sup>C NMR** (101 MHz, CDCl<sub>3</sub>) δ 153.9 (d, *J* = 2.9 Hz), 131.0 (d, *J* = 11.8 Hz), 128.8 (d, *J* = 103.7 Hz), 127.2 (d, *J* = 13.0 Hz), 34.4, 23.8. **<sup>31</sup>P NMR** (162 MHz, C<sub>6</sub>D<sub>6</sub>) δ 17.2.

### Bis(4-isopropylphenyl)phosphine

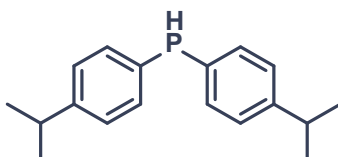

Inside a glovebox, a COtube charged with bis(4-isopropylphenyl)phosphine (604 mg, 2.11 mmol) was added THF (10 mL) and subsequently cooled to -30 °C. DIBAL-H (1.0 M in hexanes, 7.4 mL, 7.4 mmol) was added dropwise to the cold solution over 5 minutes. Upon cessation of hydrogen evolution, the COtube was sealed and stirred at ambient temperature overnight. The reaction mixture was diluted with Et<sub>2</sub>O (10 mL) and subsequently quenched with a saturated aqueous solution of Rochelle's salt (16 mL). The resultant biphasic mixture was stirred for 1 h, after which the organic layer was separated, and the aqueous phase was extracted with Et<sub>2</sub>O (2 x 10 mL). The combined organic phases were dried over anhydrous MgSO<sub>4</sub>, filtered, and concentrated. The resultant cloudy liquid was re-dissolved in Et<sub>2</sub>O (5 mL) and passed through a short column of basic alumina, eluting with Et<sub>2</sub>O (3 x 5 mL). Subsequent removal of the solvent under reduced pressure afforded bis(4-isopropylphenyl)phosphine as a colourless oil (440 mg, 1.63 mmol, 77%).

**<sup>1</sup>H NMR** (400 MHz, C<sub>6</sub>D<sub>6</sub>) δ 7.47 – 7.42 (m, 4H), 6.99 – 6.96 (m, 4H), 5.32 (d, *J* = 214.4 Hz, 1H), 2.62 (sept, *J* = 6.9 Hz, 2H), 1.07 (d, *J* = 7.0 Hz, 12H). **<sup>13</sup>C NMR** (101 MHz, C<sub>6</sub>D<sub>6</sub>) δ 149.3, 134.6 (d, *J* = 17.2 Hz), 132.6 (d, *J* = 9.6 Hz), 127.1 (d, *J* = 6.4 Hz), 34.2, 24.0. **<sup>31</sup>P NMR** (162 MHz, C<sub>6</sub>D<sub>6</sub>) δ -43.0.

**Bis(2-(bis(4-isopropylphenyl)phosphaneyl)ethyl)amine, Ru-MACHO<sup>*p*(iPr)</sup>**

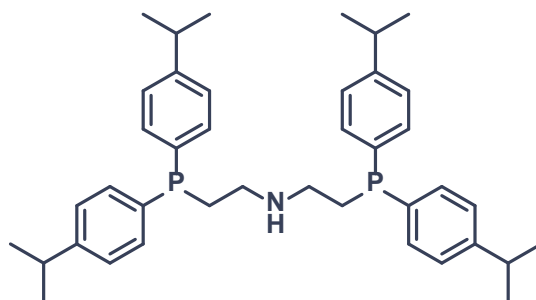

Inside a glovebox, a COtube charged with bis(4-isopropylphenyl)phosphine (440 mg, 1.63 mmol) was added THF (10 mL) and *t*BuOK (498 mg, 4.43 mmol). The resultant deep red solution was stirred at ambient temperature for 15 minutes prior to the addition of bis(2-chloroethyl)amine hydrochloride (132 mg, 0.739 mmol). The COtube was sealed, and the reaction mixture was refluxed overnight. After reaching ambient temperature, the reaction mixture was diluted with Et<sub>2</sub>O (10 mL) and subsequently quenched with water (10 mL). The organic layer was separated, and the aqueous phase was extracted with Et<sub>2</sub>O (2 x 10 mL). The combined organic phases were dried over anhydrous Na<sub>2</sub>SO<sub>4</sub>, filtered, and concentrated. Outside the glovebox, purification via AFCC using degassed solvents (heptane to heptane/EtOAc 1:3) afforded MACHO<sup>*p*(iPr)</sup> as a colourless oil (278 mg, 455 μmol, 62%). The compound was immediately transferred back into the glovebox after isolation.

**<sup>1</sup>H NMR** (400 MHz, CD<sub>2</sub>Cl<sub>2</sub>) δ 7.36 – 7.32 (m, 8H), 7.20 – 7.19 (m, 8H), 2.88 (sept, *J* = 6.9 Hz, 4H), 2.71 – 2.65 (m, 4H), 2.19 – 2.15 (m, 4H), 1.44 (bs, 1H), 1.23 (d, *J* = 6.9 Hz, 24H). **<sup>13</sup>C NMR** (101 MHz, CD<sub>2</sub>Cl<sub>2</sub>) δ 149.9, 136.1 (d, *J* = 12.0 Hz), 133.0 (d, *J* = 19.1 Hz), 127.0 (d, *J* = 7.0 Hz), 46.7 (d, *J* = 20.9 Hz), 34.3, 29.2 (d, *J* = 11.7 Hz), 24.0. **<sup>31</sup>P NMR** (162 MHz, CD<sub>2</sub>Cl<sub>2</sub>) δ -23.3. **HRMS** (ESI<sup>+</sup>) *m/z* Calcd for C<sub>40</sub>H<sub>54</sub>NP<sub>2</sub> [M + H]<sup>+</sup> 610.3726; Found 610.3766.

**Ru-MACHO<sup>*p*(iPr)</sup>**

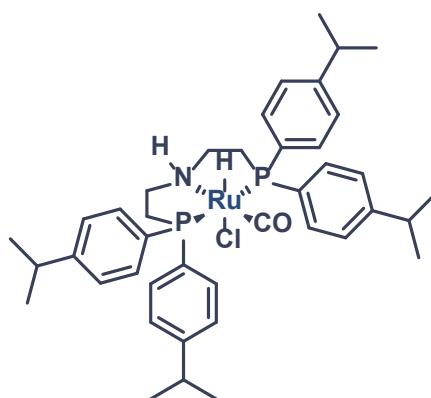

Inside a glovebox, to a COtube charged with MACHO<sup>*p*(iPr)</sup> (240 mg, 394 μmol) was added carbonylchlorohydridotris(triphenylphosphine)ruthenium(II) (357 mg, 375 μmol) and toluene (10 mL). The COtube was sealed, and the reaction mixture was stirred at reflux for 5 h. After reaching ambient temperature, the solvent was evaporated under reduced pressure and the remaining sticky oil redissolved in Et<sub>2</sub>O (3 mL). The solution was left at -30 °C overnight after which a white solid had precipitated. The solvent was decanted off and the solids rinsed with Et<sub>2</sub>O (2 mL) which was decanted off. The solids were

added Et<sub>2</sub>O (2 mL), sonicated for 30 minutes, centrifuged, solvent decanted, and at last the solids were dried in vacuo to afford Ru-MACHO<sup>p(iPr)</sup> as a white solid (158 mg, 204 μmol, 85%).

**<sup>1</sup>H NMR** (400 MHz, CD<sub>2</sub>Cl<sub>2</sub>) δ 7.78 – 7.68 (m, 8H), 7.30 – 7.27 (m, 8H), 3.93 – 3.88 (m, 1H), 3.46 – 3.34 (m, 2H), 3.00 – 2.88 (m, 6H), 2.54 – 2.38 (m, 4H), 1.25 (t, *J* = 7.1 Hz, 24H), -15.41 (t, *J* = 19.5 Hz, 1H). **<sup>13</sup>C NMR** (101 MHz, CD<sub>2</sub>Cl<sub>2</sub>) δ 207.5 (t, *J* = 11.8 Hz), 151.3, 151.3, 135.3 (t, *J* = 23.5 Hz), 133.6 (t, *J* = 6.6 Hz), 132.5 (t, *J* = 6.7 Hz), 132.0 (t, *J* = 21.7 Hz), 127.0 (t, *J* = 5.0 Hz), 126.8 (t, *J* = 5.2 Hz), 52.7 (t, *J* = 5.1 Hz), 34.4, 34.3, 31.9 (t, *J* = 11.5 Hz), 23.9, 23.9. **<sup>31</sup>P NMR** (162 MHz, CD<sub>2</sub>Cl<sub>2</sub>) δ 50.3 (d, *J* = 6.6 Hz). **HRMS** (ESI<sup>+</sup>) *m/z* Calcd for C<sub>41</sub>H<sub>54</sub>NOP<sub>2</sub>Ru [M - Cl]<sup>+</sup> 740.2719; Found 740.2750.

### 3-(4-Bromophenyl)pentan-3-ol

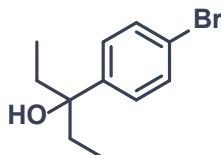

A round-bottomed flask charged with 1,4-dibromobenzene (14.2 g, 60.0 mmol) was added THF (100 mL) and subsequently cooled to -78 °C, after which *n*BuLi (1.5 M in hexanes, 33.3 mL, 50.0 mmol) was added dropwise. The resultant mixture was stirred for 1 h prior to the addition of 3-pentanone (8.61 g, 100 mmol). The reaction mixture was stirred at -78 °C for 1 h before slowly warming to ambient temperature to be stirred overnight. The reaction mixture was diluted with EtOAc (100 mL) and subsequently quenched with a saturated aqueous solution of NH<sub>4</sub>Cl (100 mL). The organic layer was separated, and the aqueous phase was extracted with EtOAc (2 x 100 mL). The combined organic phases were dried over anhydrous MgSO<sub>4</sub>, filtered, and concentrated. Purification via AFCC (heptane to heptane/EtOAc 9:1) afforded 3-(4-bromophenyl)pentan-3-ol as a colourless oil (10.7 g, 43.9 mmol, 88%).

**<sup>1</sup>H NMR** (400 MHz, CDCl<sub>3</sub>) δ 7.47 – 7.43 (m, 2H), 7.26 – 7.24 (m, 2H), 1.88 – 1.73 (m, 4H), 1.59 – 1.57 (m, 1H), 0.75 (t, *J* = 7.4 Hz, 6H). **<sup>13</sup>C NMR** (101 MHz, CDCl<sub>3</sub>) δ 144.9, 131.2, 127.6, 120.4, 77.4, 35.2, 7.9.

Spectroscopic data in agreement with that reported by Aubrey, M. *et al.*<sup>5</sup>

### 1-Bromo-4-(1-ethylpropyl)benzene

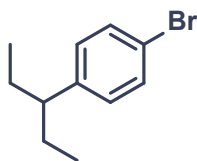

A round-bottomed flask charged with 3-(4-bromophenyl)pentan-3-ol (10.7 g, 43.9 mmol) was added DCM (150 mL) and subsequently cooled to 0 °C, after which Et<sub>3</sub>SiH (17.7 mL, 110 mmol) and TFA (16.9 mL, 219 mmol) were added dropwise in that order. The reaction mixture was stirred for at 0 °C for 1 h before slowly warming to ambient temperature to be stirred overnight. The reaction mixture was quenched with a saturated aqueous solution of NaHCO<sub>3</sub> (150 mL). The organic layer was separated, and the aqueous phase was extracted with DCM (2 x 100 mL). The combined organic phases were dried over anhydrous MgSO<sub>4</sub>, filtered, and concentrated. Purification via AFCC (heptane) afforded 1-bromo-4-(1-ethylpropyl)benzene as a colourless oil (9.79 g, 43.1 mmol, 98%).

**<sup>1</sup>H NMR** (400 MHz, CDCl<sub>3</sub>) δ 7.42 – 7.38 (m, 2H), 7.03 – 6.99 (m, 2H), 2.32 – 2.24 (m, 1H), 1.73 – 1.62 (m, 2H), 1.56 – 1.44 (m, 2H), 0.75 (t, *J* = 7.4 Hz, 6H). **<sup>13</sup>C NMR** (101 MHz, CDCl<sub>3</sub>) δ 144.9, 131.3, 129.7, 119.5, 49.4, 29.3, 12.2.

Spectroscopic data in agreement with that reported by Aubrey, M. *et al.*<sup>5</sup>

### Bis(4-(pentan-3-yl)phenyl)phosphine oxide

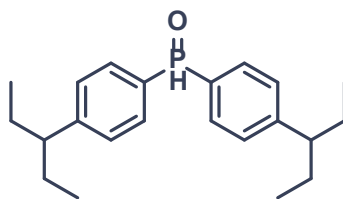

A round-bottomed flask charged with 1-bromo-4-(1-ethylpropyl)benzene (1.99 g, 8.75 mmol) was added THF (10 mL) and subsequently cooled to  $-78\text{ }^{\circ}\text{C}$ , after which *t*BuLi (1.7 M in hexanes, 8.8 mL, 15 mmol) was added dropwise. The resultant mixture was stirred for 30 min prior to the addition of diethyl phosphate (345 mg, 2.50 mmol). The reaction mixture was stirred at  $-78\text{ }^{\circ}\text{C}$  for 1 h before slowly warming to ambient temperature to be stirred overnight. The reaction mixture was diluted with DCM (30 mL) and subsequently quenched with 1 M HCl (30 mL). The organic layer was separated, and the aqueous phase was extracted with DCM (2 x 30 mL). The combined organic phases were dried over anhydrous  $\text{MgSO}_4$ , filtered, and concentrated. Purification via AFCC (heptane to heptane/EtOAc 1:1) afforded bis(4-(pentan-3-yl)phenyl)phosphine oxide as a colourless oil (769 mg, 2.25 mmol, 90%).

$^1\text{H NMR}$  (400 MHz,  $\text{CDCl}_3$ )  $\delta$  8.05 (d,  $J = 477.9$  Hz, 1H), 7.65 – 7.59 (m, 4H), 7.28 – 7.26 (m, 4H), 2.42 – 2.34 (m, 2H), 1.76 – 1.64 (m, 4H), 1.61 – 1.49 (m, 4H), 0.76 (t,  $J = 7.4$  Hz, 12H).  $^{13}\text{C NMR}$  (101 MHz,  $\text{CDCl}_3$ )  $\delta$  151.2, 131.0 (d,  $J = 11.8$  Hz), 128.8 (d,  $J = 103.7$  Hz), 128.6 (d,  $J = 13.1$  Hz), 50.0, 29.2, 12.3.  $^{31}\text{P NMR}$  (162 MHz,  $\text{CDCl}_3$ )  $\delta$  21.9.

### Bis(4-(pentan-3-yl)phenyl)phosphine

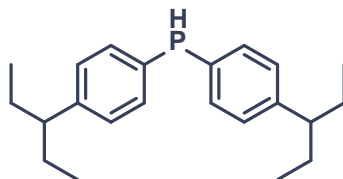

Inside a glovebox, a COtube charged with bis(4-(pentan-3-yl)phenyl)phosphine oxide (769 mg, 2.25 mmol) was added THF (10 mL) and subsequently cooled to  $-30\text{ }^{\circ}\text{C}$ . DIBAL-H (1.0 M in hexanes, 7.9 mL, 7.9 mmol) was added dropwise to the cold solution over 5 minutes. Upon cessation of hydrogen evolution, the COtube was sealed and stirred at ambient temperature overnight. The reaction mixture was diluted with  $\text{Et}_2\text{O}$  (10 mL) and subsequently quenched with a saturated aqueous solution of Rochelle's salt (17 mL). The resultant biphasic mixture was stirred for 1 h, after which the organic layer was separated, and the aqueous phase was extracted with  $\text{Et}_2\text{O}$  (2 x 10 mL). The combined organic phases were dried over anhydrous  $\text{MgSO}_4$ , filtered, and concentrated. The resultant cloudy liquid was re-dissolved in  $\text{Et}_2\text{O}$  (5 mL) and passed through a short column of basic alumina, eluting with  $\text{Et}_2\text{O}$  (3 x 5 mL). Subsequent removal of the solvent under reduced pressure afforded bis(4-(pentan-3-yl)phenyl)phosphine as a colourless oil (597 mg, 1.83 mmol, 81%).

$^1\text{H NMR}$  (400 MHz,  $\text{C}_6\text{D}_6$ )  $\delta$  7.47 – 7.42 (m, 4H), 6.93 – 6.90 (m, 4H), 5.34 (d,  $J = 214.2$ , 1H), 2.14 – 2.06 (m, 2H), 1.54 – 1.36 (m, 8H), 0.71 (t,  $J = 7.4$  Hz, 12H).  $^{13}\text{C NMR}$  (101 MHz,  $\text{CDCl}_3$ )  $\delta$  -43.5.  $^{31}\text{P NMR}$  (162 MHz,  $\text{CDCl}_3$ )  $\delta$  146.3, 134.5 (d,  $J = 17.2$  Hz), 132.4 (d,  $J = 9.5$  Hz), 128.5 (d,  $J = 6.3$  Hz), 49.7, 29.5, 12.4.

**Bis(2-(bis(4-(pentan-3-yl)phenyl)phosphaneyl)ethyl)amine, MACHO<sup>p(3-Pe)</sup>**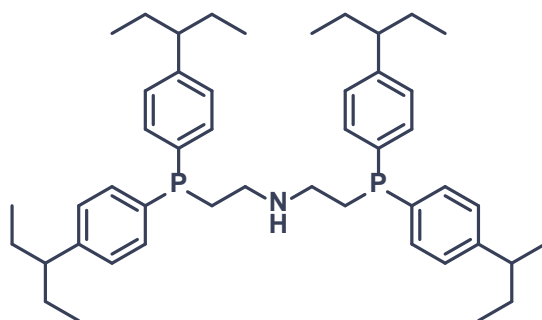

Inside a glovebox, a COtube charged with bis(4-(pentan-3-yl)phenyl)phosphine (597 mg, 1.83 mmol) was added THF (10 mL) and *t*BuOK (559 mg, 4.99 mmol). The resultant deep red solution was stirred at ambient temperature for 15 minutes prior to the addition of bis(2-chloroethyl)amine hydrochloride (148 mg, 0.831 mmol). The COtube was sealed, and the reaction mixture was refluxed overnight. After reaching ambient temperature, the reaction mixture was diluted with Et<sub>2</sub>O (10 mL) and subsequently quenched with water (10 mL). The organic layer was separated, and the aqueous phase was extracted with Et<sub>2</sub>O (2 x 10 mL). The combined organic phases were dried over anhydrous Na<sub>2</sub>SO<sub>4</sub>, filtered, and concentrated. Outside the glovebox, purification via AFCC using degassed solvents (heptane to heptane/EtOAc 1:4) afforded MACHO<sup>p(3-Pe)</sup> as a colourless oil (324 mg, 449 μmol, 54%). The compound was immediately transferred back into the glovebox after isolation.

**<sup>1</sup>H NMR** (400 MHz, CD<sub>2</sub>Cl<sub>2</sub>) δ 7.35 – 7.31 (m, 8H), 7.12 – 7.10 (m, 8H), 2.71 – 2.65 (m, 4H), 2.34 – 2.27 (m, 4H), 2.18 – 2.15 (m, 4H), 1.73 – 1.63 (m, 8H), 1.58 – 1.47 (m, 8H), 0.75 (t, *J* = 7.4 Hz, 24H). **<sup>13</sup>C NMR** (101 MHz, CD<sub>2</sub>Cl<sub>2</sub>) δ 146.9, 136.1 (d, *J* = 12.0 Hz), 132.9 (d, *J* = 19.1 Hz), 128.4 (d, *J* = 7.0 Hz), 49.8, 46.8 (d, *J* = 20.8 Hz), 29.5, 29.4, 12.4. **<sup>31</sup>P NMR** (162 MHz, CD<sub>2</sub>Cl<sub>2</sub>) δ -22.7. **HRMS** (ESI<sup>+</sup>) *m/z* Calcd for C<sub>48</sub>H<sub>70</sub>NP<sub>2</sub> [M + H]<sup>+</sup> 722.4978; Found 722.5017.

**Ru-MACHO<sup>p(3-Pe)</sup>**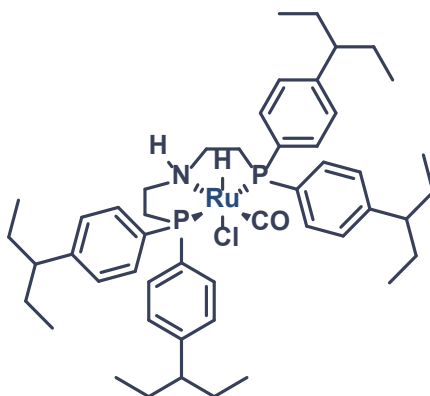

Inside a glovebox, to a COtube charged with MACHO<sup>p(3-Pe)</sup> (324 mg, 0.449 mmol) was added carbonylchlorohydridotris(triphenylphosphine)ruthenium(II) (407 mg, 0.428 mmol) and toluene (10 mL). The COtube was sealed, and the reaction mixture was stirred at reflux for 5 h. After reaching ambient temperature, the solvent was evaporated under reduced pressure and the remaining sticky oil redissolved in Et<sub>2</sub>O (3 mL). The solution was left at -30 °C overnight after which a white solid had precipitated. The solvent was decanted off and the solids rinsed with Et<sub>2</sub>O (2 mL) which was decanted off. The solids were re-dissolved in Et<sub>2</sub>O (3 mL), and the solution was left at -30 °C overnight after which a white solid had precipitated. The solvent was decanted off and the solids rinsed with Et<sub>2</sub>O (2 mL) which was decanted off, and at last the solids were dried in vacuo to afford Ru-MACHO<sup>p(3-Pe)</sup> as a white solid (91.2 mg, 103 μmol, 24%).

**<sup>1</sup>H NMR** (400 MHz, CD<sub>2</sub>Cl<sub>2</sub>) δ 7.76 – 7.70 (m, 8H), 7.72 – 7.19 (m, 8H), 4.09 – 4.03 (m, 1H), 3.40 – 3.29 (m, 2H), 2.92 – 2.87 (m, 2H), 2.51 – 2.32 (m, 8H), 1.62 – 1.50 (m, 8H), 0.81 – 0.75 (m, 24H), -15.30 (t, *J* = 19.3 Hz, 1H). **<sup>13</sup>C NMR** (101 MHz, CD<sub>2</sub>Cl<sub>2</sub>) δ 207.4 (t, *J* = 12.4 Hz), 148.5, 148.4, 135.0 (t, *J* = 23.4 Hz), 133.5 (t, *J* = 6.5 Hz), 132.7 (t, *J* = 6.7 Hz), 132.2 (t, *J* = 21.6 Hz), 128.3 (t, *J* = 5.0 Hz), 128.1 (t, *J* = 5.1 Hz), 52.6 (t, *J* = 4.9 Hz), 49.8, 49.8 32.4 (t, *J* = 11.4 Hz), 29.4, 29.3, 29.3, 29.3, 12.4, 12.4, 12.4, 12.3. **<sup>31</sup>P NMR** (162 MHz, CD<sub>2</sub>Cl<sub>2</sub>) δ 50.6 (d, *J* = 4.1 Hz). **HRMS** (ESI<sup>+</sup>) *m/z* Calcd for C<sub>49</sub>H<sub>70</sub>NOP<sub>2</sub>Ru [M - Cl]<sup>+</sup> 852.3971; Found 852.4029.

### Bis(2-naphthyl)phosphine

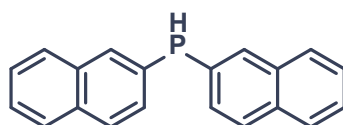

Inside a glovebox, a COtube charged with bis(2-naphthyl)phosphine oxide (1.36 g, 4.50 mmol) was added THF (12 mL) and subsequently cooled to -30 °C. DIBAL-H (1.0 M in hexanes, 15.8 mL, 15.8 mmol) was added dropwise to the cold solution over 5 minutes. Upon cessation of hydrogen evolution, the COtube was sealed and stirred at ambient temperature overnight. The reaction mixture was diluted with Et<sub>2</sub>O (20 mL) and subsequently quenched with a saturated aqueous solution of Rochelle's salt (33 mL). The resultant biphasic mixture was stirred for 1 h, after which the organic layer was separated, and the aqueous phase was extracted with Et<sub>2</sub>O (3 x 20 mL). The combined organic phases were dried over anhydrous MgSO<sub>4</sub>, filtered, and concentrated. The resultant cloudy liquid was re-dissolved in Et<sub>2</sub>O (10 mL) and passed through a short column of basic alumina, eluting with Et<sub>2</sub>O (3 x 10 mL). Subsequent removal of the solvent under reduced pressure afforded bis(2-naphthyl)phosphine as a white solid (1.20 g, 4.20 mmol, 93%).

**<sup>1</sup>H NMR** (400 MHz, C<sub>6</sub>D<sub>6</sub>) δ 7.95 (d, *J* = 8.6 Hz, 2H), 7.73 – 7.66 (m, 6H), 7.44 – 7.37 (m, 6H), 5.44 (d, *J* = 218.9 Hz, 1H). **<sup>13</sup>C NMR** (101 MHz, C<sub>6</sub>D<sub>6</sub>) δ 134.6 (d, *J* = 22.1 Hz), 134.0 (d, *J* = 7.9 Hz), 133.7, 132.8 (d, *J* = 11.2 Hz), 131.0 (d, *J* = 12.7 Hz), 128.5 (d, *J* = 5.4 Hz), 128.2, 126.7 (d, *J* = 19.4 Hz). **<sup>31</sup>P NMR** (162 MHz, C<sub>6</sub>D<sub>6</sub>) δ -39.7.

Spectroscopic data in agreement with that reported by Bibal, B. *et al.*<sup>6</sup>

### Bis(2-(bis(2-naphthyl)phosphaneyl)ethyl)amine, MACHO<sup>Naph</sup>

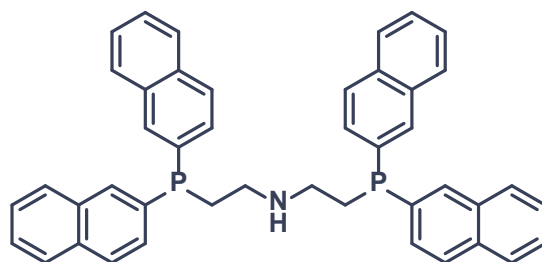

Inside a glovebox, a COtube charged with bis(2-naphthyl)phosphine (441 mg, 1.54 mmol) was added THF (10 mL) and *t*BuOK (471 mg, 4.20 mmol). The resultant deep red solution was stirred at ambient temperature for 15 minutes prior to the addition of bis(2-chloroethyl)amine hydrochloride (125 mg, 0.700 mmol). The COtube was sealed, and the reaction mixture was refluxed overnight. After reaching ambient temperature, the reaction mixture was diluted with Et<sub>2</sub>O (10 mL) and subsequently quenched with water (10 mL). The organic layer was separated, and the aqueous phase was extracted with Et<sub>2</sub>O (3 x 10 mL). The combined organic phases were dried over anhydrous Na<sub>2</sub>SO<sub>4</sub>, filtered, and concentrated. Outside the glovebox, purification via AFCC using degassed solvents (heptane to heptane/EtOAc

1:2) afforded MACHO<sup>Naph</sup> as a white solid (272 mg, 424  $\mu$ mol, 61%). The compound was immediately transferred back into the glovebox after isolation.

<sup>1</sup>H NMR (400 MHz, CDCl<sub>3</sub>)  $\delta$  7.99 – 7.97 (m, 4H), 7.80 – 7.76 (m, 8H), 7.74 – 7.72 (m, 4H), 7.51 – 7.44 (m, 8H), 7.41 – 7.37 (m, 4H), 2.82 – 2.76 (m, 4H), 2.42 – 2.38 (m, 4H), 1.26 (bs, 1H). <sup>13</sup>C NMR (101 MHz, CDCl<sub>3</sub>)  $\delta$  135.8 (d,  $J$  = 12.6 Hz), 133.5 (d,  $J$  = 3.6 Hz), 133.3 (d,  $J$  = 8.4 Hz), 133.2, 129.1 (d,  $J$  = 14.4 Hz), 128.2 (d,  $J$  = 6.0 Hz), 128.1, 127.9, 126.8, 126.5, 46.5 (d,  $J$  = 20.5 Hz), 29.0 (d,  $J$  = 12.3 Hz). <sup>31</sup>P NMR (162 MHz, CDCl<sub>3</sub>)  $\delta$  -19.6.

Spectroscopic data in agreement with that reported by Liu, W. *et al.*<sup>3</sup>

#### Ru-MACHO<sup>Naph</sup>

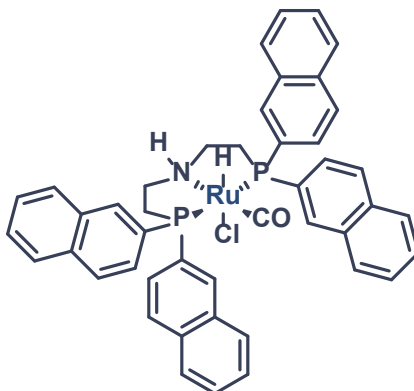

Inside a glovebox, to a COtube charged with MACHO<sup>Naph</sup> (33.7 mg, 52.5  $\mu$ mol) was added carbonylchlorohydridotris(triphenylphosphine)ruthenium(II) (47.6 mg, 50.0  $\mu$ mol) and toluene (0.45 mL). The COtube was sealed, and the reaction mixture was stirred at 120 °C for 5 h. After reaching ambient temperature, a white precipitate could be observed in the reaction, and the COtube was taken inside the glovebox where Et<sub>2</sub>O (3 mL) was added. The solids were filtrated, followed by rinsing with Et<sub>2</sub>O (10 mL) and pentane (10 mL), the solids were then dried in vacuo to afford Ru-MACHO<sup>Naph</sup> as a white solid (24.6 mg, 30.5  $\mu$ mol, 61%).

<sup>1</sup>H NMR (400 MHz, CD<sub>2</sub>Cl<sub>2</sub>)  $\delta$  8.51 (t,  $J$  = 6.0 Hz, 2H), 8.41 (t,  $J$  = 6.1 Hz, 2H), 7.96 – 7.78 (m, 16H), 7.57 – 7.51 (m, 8H), 4.10 – 4.03 (m, 1H), 3.60 – 3.48 (m, 2H), 3.21 – 3.16 (m, 2H), 2.77 – 2.62 (m, 4H), -14.91 (t,  $J$  = 19.4 Hz, 1H). Poor solubility prevented <sup>13</sup>C NMR measurements. <sup>31</sup>P NMR (162 MHz, CD<sub>2</sub>Cl<sub>2</sub>)  $\delta$  53.8. HRMS (ESI<sup>+</sup>)  $m/z$  Calcd for C<sub>45</sub>H<sub>38</sub>NOP<sub>2</sub>Ru [M - Cl]<sup>+</sup> 772.1467; Found 772.1517.

#### Bis([1,1'-biphenyl]-4-yl)phosphine oxide

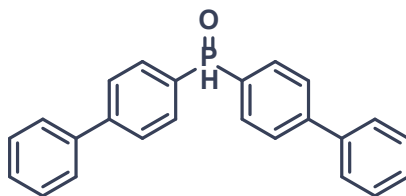

Inside a glovebox, a COtube was charged with magnesium turnings (729 mg, 30.0 mmol) followed by sealing. The flask was stirred overnight at 110 °C without solvent. To the flask was added THF (20 mL) and a crystal of iodine. The slight orange solution was stirred for 30 min, at which point a grey suspension could be observed. The flask was slowly added *p*-bromobiphenyl (6.99 g, 30.0 mmol), after which the mixture was heated to 65 °C and stirred for 2 h. The mixture was cooled to ambient temperature prior to the dropwise addition of diethyl phosphate (1.38 g, 10.0 mmol). The reaction mixture was stirred at ambient temperature overnight. The reaction mixture was quenched with 1 M HCl (50 mL) and the

aqueous phase extracted with DCM (3 x 50 mL). The combined organic phases were washed twice with water (2 x 30 mL), dried over Na<sub>2</sub>SO<sub>4</sub>, and evaporated onto celite®. Purification via AFCC (Heptane/EtOAc 3:1 EtOAc) afforded bis([1,1'-biphenyl]-4-yl)phosphine oxide as a white solid (3170 mg, 8.9 mmol, 89%).

<sup>1</sup>H NMR (400 MHz, CDCl<sub>3</sub>) δ 8.18 (d, *J* = 481.1 Hz, 1H), 7.86 – 7.78 (m, 4H), 7.77 – 7.71 (m, 4H), 7.65 – 7.59 (m, 4H), 7.51 – 7.44 (m, 4H), 7.44 – 7.38 (m, 2H). <sup>13</sup>C NMR (101 MHz, CDCl<sub>3</sub>) δ 145.6 (d, *J* = 2.9 Hz), 139.9, 131.4 (d, *J* = 11.7 Hz), 130.1 (d, *J* = 102.8 Hz), 129.1, 128.4, 127.8 (d, *J* = 13.2 Hz), 127.4. <sup>31</sup>P NMR (162 MHz, CDCl<sub>3</sub>) δ 21.0.

Spectroscopic data in agreement with that reported by Qiu, R. *et al.*<sup>7</sup>

### Bis([1,1'-biphenyl]-4-yl)phosphine

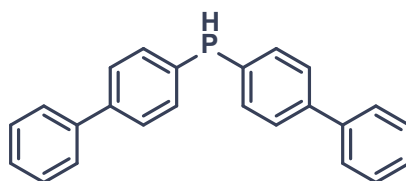

Inside a glovebox, a COtube charged with bis([1,1'-biphenyl]-4-yl)phosphine oxide (1.60 g, 4.50 mmol) was added THF (14 mL) and subsequently cooled to -30 °C. DIBAL-H (1.0 M in hexanes, 15.8 mL, 15.8 mmol) was added dropwise to the cold solution over 5 minutes. Upon cessation of hydrogen evolution, the COtube was sealed and stirred at ambient temperature overnight. The reaction mixture was diluted with Et<sub>2</sub>O (10 mL) and subsequently quenched with a saturated aqueous solution of Rochelle's salt (33 mL). The resultant biphasic mixture was stirred for 1 h, after which the organic layer was separated, and the aqueous phase was extracted with Et<sub>2</sub>O (3 x 10 mL). The combined organic phases were dried over anhydrous MgSO<sub>4</sub>, filtered, and concentrated. The resultant cloudy liquid was re-dissolved in Et<sub>2</sub>O (5.0 mL) and passed through a short column of basic alumina, eluting with Et<sub>2</sub>O (3 x 5.0 mL). Subsequent removal of the solvent under reduced pressure afforded bis([1,1'-biphenyl]-4-yl)phosphine as a white solid (1.36 g, 4.03 mmol, 90%).

<sup>1</sup>H NMR (400 MHz, CDCl<sub>3</sub>) δ 7.61 – 7.56 (m, 6H), 7.46 – 7.42 (m, 2H), 7.38 – 7.33 (m, 1H), 5.33 (d, *J* = 219.6 Hz, 1H). <sup>13</sup>C NMR (101 MHz, CDCl<sub>3</sub>) δ 141.6, 140.7, 134.6 (d, *J* = 16.9 Hz), 133.6 (d, *J* = 9.9 Hz), 129.0, 127.7, 127.5 (d, *J* = 6.5 Hz), 127.2. <sup>31</sup>P NMR (162 MHz, CDCl<sub>3</sub>) δ -42.6.

### Bis(2-(di([1,1'-biphenyl]-4-yl)phosphaneyl)ethyl)amine, MACHO<sup>Biph</sup>

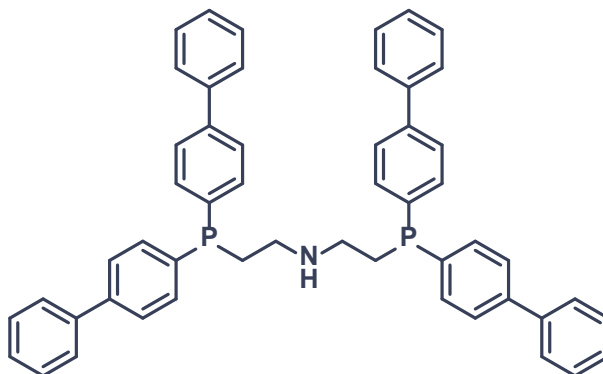

Inside a glovebox, a COtube charged with bis([1,1'-biphenyl]-4-yl)phosphine (521 mg, 1.54 mmol) was added 2-MeTHF (10 mL) and *t*BuOK (471 mg, 4.20 mmol). The resultant deep red solution was stirred at ambient temperature for 15 minutes prior to the addition of bis(2-chloroethyl)amine hydrochloride (125 mg, 0.700 mmol). The COtube was sealed, and the reaction mixture was refluxed overnight. After

reaching ambient temperature, the reaction mixture was diluted with Et<sub>2</sub>O (10 mL) and subsequently quenched with water (10 mL). The organic layer was separated, and the aqueous phase was extracted with EtOAc (3 x 10 mL). The combined organic phases were dried over anhydrous Na<sub>2</sub>SO<sub>4</sub>, filtered, and concentrated. Outside the glovebox, purification via AFCC using degassed solvents (heptane to EtOAc) afforded MACHO<sup>Biph</sup> as an off-white solid (120 mg, 161 μmol, 23%). The compound was immediately transferred back into the glovebox after isolation.

<sup>1</sup>H NMR (400 MHz, CDCl<sub>3</sub>) δ 7.59 – 7.55 (m, 16H), 7.53 – 7.49 (m, 8H), 7.44 – 7.41 (m, 8H), 7.36 – 7.33 (m, 4H), 2.85 – 2.79 (m, 4H), 2.33 – 2.30 (m, 4H). <sup>13</sup>C NMR (101 MHz, CDCl<sub>3</sub>) δ 141.7, 140.6, 137.3 – 137.1 (m), 133.3 (d, *J* = 18.8 Hz), 129.0, 127.7, 127.4 (d, *J* = 7.0 Hz), 127.2, 46.5 – 46.3 (m), 29.1 – 28.9 (m). <sup>31</sup>P NMR (162 MHz, CDCl<sub>3</sub>) δ -22.2. HRMS (ESI<sup>+</sup>) *m/z* Calcd for C<sub>52</sub>H<sub>46</sub>NP<sub>2</sub> [M + H]<sup>+</sup> 746.3100; Found 746.3109.

#### Ru-MACHO<sup>Biph</sup>

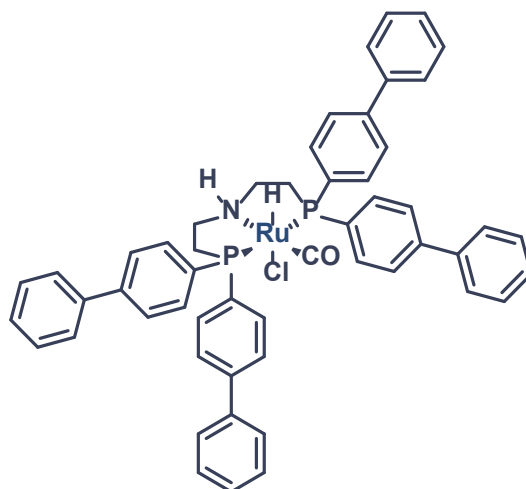

Inside a glovebox, to a COtube charged with MACHO<sup>Biph</sup> (38.7 mg, 50.0 μmol) was added carbonylchlorohydridotris(triphenylphosphine)ruthenium(II) (47.6 mg, 50.0 μmol) and toluene (0.45 mL). The COtube was sealed, and the reaction mixture was stirred at reflux for 5 h. After reaching ambient temperature, white precipitate could be observed in the reaction, and the COtube was taken inside the glovebox where Et<sub>2</sub>O (5 mL) was added. The solids were filtered, followed by rinsing the solids with Et<sub>2</sub>O (10 mL) and pentane (10 mL), the solids were then dried in vacuo to afford Ru-MACHO<sup>Biph</sup> as a white solid (37.4 mg, 41.1 μmol, 82%).

<sup>1</sup>H NMR (400 MHz, CDCl<sub>3</sub>) δ 7.99 – 7.89 (m, 8H), 7.65 – 7.58 (m, 16H), 7.46 – 7.35 (m, 12H), 4.23 – 4.18 (m, 1H), 3.52 – 3.42 (m, 2H), 3.04 – 2.98 (m, 2H), 2.65 – 2.52 (m, 4H), -15.29 (t, *J* = 19.5 Hz, 1H). <sup>13</sup>C NMR (101 MHz, CDCl<sub>3</sub>) δ 142.9, 142.9, 140.7, 140.3, 136.2 (t, *J* = 23.4 Hz), 133.9 (t, *J* = 6.7 Hz), 133.2 – 132.9 (m), 129.0, 129.0, 128.0, 127.8, 127.4, 127.3, 127.3, 127.3, 52.5 – 52.4 (m), 32.3 – 32.1 (m). <sup>31</sup>P NMR (162 MHz, CDCl<sub>3</sub>) δ 51.1 (d, *J* = 3.8 Hz). HRMS (ESI<sup>+</sup>) *m/z* Calcd for C<sub>53</sub>H<sub>46</sub>NOP<sub>2</sub>Ru [M - Cl]<sup>+</sup> 876.2093; Found 876.2129.

### Bis(4-(trifluoromethyl)phenyl)phosphine oxide

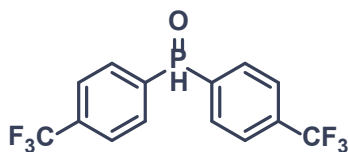

Under argon, a flame-dried round-bottomed flask charged with 4-bromobenzotrifluoride (4.05 g, 18.0 mmol) was added anhydrous THF (10 mL) and subsequently cooled to  $-78\text{ }^{\circ}\text{C}$ , after which *t*BuLi (1.7 M in hexanes, 8.8 mL, 15 mmol) was added dropwise. The resultant mixture was stirred for 30 min prior to the addition of diethyl phosphate (345 mg, 2.50 mmol). The reaction mixture was stirred at  $-78\text{ }^{\circ}\text{C}$  for 1 h before slowly warming to ambient temperature to be stirred overnight. The reaction mixture was diluted with DCM (30 mL) and subsequently quenched with a solution of HCl (1 M in water, 30 mL). The organic layer was separated, and the aqueous phase was extracted with DCM (2 x 30 mL). The combined organic phases were dried over anhydrous  $\text{MgSO}_4$ , filtered, and concentrated. Purification via AFCC (heptane to heptane/EtOAc 1:1) afforded bis(3,5-di(pentan-3-yl)phenyl)phosphine oxide as a white solid (971 mg, 2.01 mmol, 80%).

$^1\text{H NMR}$  (400 MHz,  $\text{CDCl}_3$ )  $\delta$  8.24 (d,  $J = 504.8$  Hz, 1H), 7.89 – 7.78 (m, 8H).  $^{13}\text{C NMR}$  (101 MHz,  $\text{CDCl}_3$ )  $\delta$  134.9 (d,  $J = 99.7$  Hz), 134.8 (dd,  $J = 33.0, 2.9$  Hz), 131.3 (d,  $J = 12.0$  Hz), 126.1 (dq,  $J = 13.2, 3.7$  Hz), 123.4 (q,  $J = 272.4$  Hz).  $^{19}\text{F NMR}$  (176 MHz,  $\text{CDCl}_3$ )  $\delta$  -63.0.  $^{31}\text{P NMR}$  (162 MHz,  $\text{CDCl}_3$ )  $\delta$  14.4.

Spectroscopic data in agreement with that reported by Xie, X. *et al.*<sup>8</sup>

### Bis(4-(trifluoromethyl)phenyl)phosphine

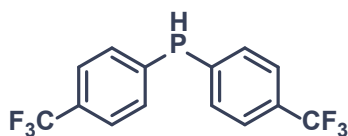

Inside a glovebox, a COtube charged with bis(4-(trifluoromethyl)phenyl)phosphine oxide (947 mg, 2.80 mmol) was added THF (10 mL) and subsequently cooled to  $-30\text{ }^{\circ}\text{C}$ . DIBAL-H (1.0 M in hexanes, 9.8 mL, 9.8 mmol) was added dropwise to the cold solution over 5 minutes. Upon cessation of hydrogen evolution, the COtube was sealed and stirred at ambient temperature overnight. The reaction mixture was diluted with  $\text{Et}_2\text{O}$  (10 mL) and subsequently quenched with a saturated aqueous solution of Rochelle's salt (21 mL). The resultant biphasic mixture was stirred for 1 h, after which the organic layer was separated, and the aqueous phase was extracted with  $\text{Et}_2\text{O}$  (3 x 10 mL). The combined organic phases were dried over anhydrous  $\text{MgSO}_4$ , filtered, and concentrated. The resultant cloudy liquid was re-dissolved in  $\text{Et}_2\text{O}$  (5.0 mL) and passed through a short column of basic alumina, eluting with  $\text{Et}_2\text{O}$  (3 x 5.0 mL). Subsequent removal of the solvent under reduced pressure afforded bis(4-(trifluoromethyl)phenyl)phosphine as a colourless oil (883 mg, 2.74 mmol, 98%).

$^1\text{H NMR}$  (400 MHz,  $\text{C}_6\text{D}_6$ )  $\delta$  7.18 (d,  $J = 7.8$  Hz, 4H), 6.99 (t,  $J = 7.4$  Hz, 4H), 4.85 (d,  $J = 219.6$  Hz, 1H).  $^{13}\text{C NMR}$  (101 MHz,  $\text{CDCl}_3$ )  $\delta$  138.9 (d,  $J = 12.6$  Hz), 134.3 (d,  $J = 17.0$  Hz), 131.2 (q,  $J = 32.6$  Hz), 125.7 – 125.4 (m), 124.1 (q,  $J = 272.2$  Hz).  $^{19}\text{F NMR}$  (176 MHz,  $\text{CDCl}_3$ )  $\delta$  -62.9.  $^{31}\text{P NMR}$  (162 MHz,  $\text{CDCl}_3$ )  $\delta$  -41.2.

Spectroscopic data in agreement with that reported by Qi, G.-H. *et al.*<sup>9</sup>

**Bis(2-(bis(4-(trifluoromethyl)phenyl)phosphaneyl)ethyl)amine, MACHO<sup>p(CF<sub>3</sub>)</sup>**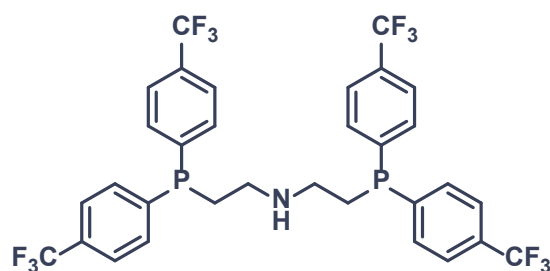

Inside a glovebox, a COtube charged with bis(4-(trifluoromethyl)phenyl)phosphine (672 mg, 2.09 mmol) was added THF (15 mL) and *t*BuOK (638 mg, 5.69 mmol). The resultant deep red solution was stirred at ambient temperature for 15 minutes prior to the addition of bis(2-chloroethyl)amine hydrochloride (169 mg, 0.948 mmol). The COtube was sealed, and the reaction mixture was refluxed for 3 days. After reaching ambient temperature, the reaction mixture was diluted with Et<sub>2</sub>O (10 mL) and subsequently quenched with water (10 mL). The organic layer was separated, and the aqueous phase was extracted with Et<sub>2</sub>O (3 x 10 mL). The combined organic phases were dried over anhydrous Na<sub>2</sub>SO<sub>4</sub>, filtered, and concentrated. Outside the glovebox, purification via AFCC using degassed solvents (heptane to heptane/EtOAc 3:7) afforded MACHO<sup>p(CF<sub>3</sub>)</sup> as a yellow oil (567 mg, 794 μmol, 84%). The compound was immediately transferred back into the glovebox after isolation.

<sup>1</sup>H NMR (400 MHz, CDCl<sub>3</sub>) δ 7.59 – 7.58 (m, 8H), 7.51 – 7.47 (m, 8H), 2.75 – 2.69 (m, 4H), 2.27 – 2.24 (m, 4H), 1.43 (bs, 1H). <sup>13</sup>C NMR (101 MHz, CDCl<sub>3</sub>) δ 142.7 (d, *J* = 16.0 Hz), 133.1 (d, *J* = 19.1 Hz), 131.5 – 130.6 (m), 131.2 (q, *J* = 32.6 Hz), 125.6 – 125.4 (m), 124.0 (q, *J* = 272.3 Hz), 46.1 (d, *J* = 19.9 Hz), 28.8 (d, *J* = 12.8 Hz). <sup>19</sup>F NMR (176 MHz, CDCl<sub>3</sub>) δ -62.9. <sup>31</sup>P NMR (162 MHz, CDCl<sub>3</sub>) δ -20.0. HRMS (ESI<sup>+</sup>) *m/z* Calcd for C<sub>32</sub>H<sub>26</sub>F<sub>12</sub>NP<sub>2</sub> [M + H]<sup>+</sup> 714.1343; Found 714.1352.

**Ru-MACHO<sup>p(CF<sub>3</sub>)</sup>**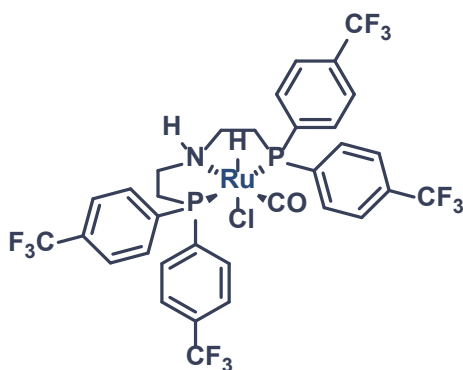

Inside a glovebox, to a COtube charged with MACHO<sup>p(CF<sub>3</sub>)</sup> (38.9 mg, 50.0 μmol) was added carbonylchlorohydridotris(triphenylphosphine)ruthenium(II) (47.6 mg, 50.0 μmol) and toluene (0.45 mL). The COtube was sealed, and the reaction mixture was stirred reflux for 5 h. After reaching ambient temperature, the reaction mixture was diluted with pentane (4 mL), and the solution was left at -30 °C overnight after which a white solid had precipitated. The solids were filtered off and rinsed with pentane (10 mL), after which a white solid was obtained. The solids were dried in vacuo to afford Ru-MACHO<sup>p(CF<sub>3</sub>)</sup> as a white solid (27.5 mg, 31.3 μmol, 63%).

<sup>1</sup>H NMR (400 MHz, C<sub>6</sub>D<sub>6</sub>) δ 7.91 – 7.87 (m, 4H), 7.50 – 7.46 (m, 4H), 7.36 (d, *J* = 7.9 Hz, 4H), 7.19 (d, *J* = 8.1 Hz, 4H), 4.74 – 4.68 (m, 1H), 2.88 – 2.74 (m, 2H), 2.25 – 2.22 (m, 2H), 2.09 – 2.01 (m, 2H), 1.86 – 1.79 (m, 2H), -15.07 (t, *J* = 20.1 Hz, 1H). <sup>13</sup>C NMR (101 MHz, C<sub>6</sub>D<sub>6</sub>) δ 206.1 (t, *J* = 12.7 Hz), 141.9 (t, *J* = 21.7 Hz), 138.2 (t, *J* = 19.4 Hz), 134.6 (t, *J* = 6.8 Hz), 132.9 – 132.3 (m), 133.3 (t, *J* = 6.9

Hz), 132.3 – 131.8 (m), 128.7 – 120.4 (m), 128.2 – 120.2 (m), 125.9 – 125.7 (m), 125.5 – 125.3 (m), 52.4 (t,  $J = 4.4$  Hz), 31.8 (t,  $J = 11.1$  Hz).  $^{19}\text{F}$  NMR (176 MHz,  $\text{C}_6\text{D}_6$ )  $\delta$  -62.7 (s), -62.9 (s).  $^{31}\text{P}$  NMR (162 MHz,  $\text{C}_6\text{D}_6$ )  $\delta$  53.8 (bs). HRMS (ESI $^+$ )  $m/z$  Calcd for  $\text{C}_{33}\text{H}_{26}\text{F}_{12}\text{NOP}_2\text{Ru}$   $[\text{M} - \text{Cl}]^+$  844.0341; Found 844.0370.

### Bis(4-methoxyphenyl)phosphine

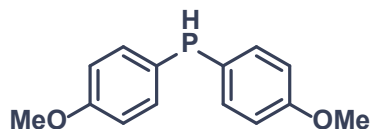

Inside a glovebox, a COtube charged with bis(4-methoxyphenyl)phosphine oxide (1.18 g, 4.50 mmol) was added THF (14 mL) and subsequently cooled to  $-30$  °C. DIBAL-H (1.0 M in hexanes, 15.8 mL, 15.8 mmol) was added dropwise to the cold solution over 5 minutes. Upon cessation of hydrogen evolution, the COtube was sealed and stirred at ambient temperature overnight. The reaction mixture was diluted with  $\text{Et}_2\text{O}$  (10 mL) and subsequently quenched with a saturated aqueous solution of Rochelle's salt (33 mL). The resultant biphasic mixture was stirred for 1 h, after which the organic layer was separated, and the aqueous phase was extracted with  $\text{Et}_2\text{O}$  (3 x 10 mL). The combined organic phases were dried over anhydrous  $\text{MgSO}_4$ , filtered, and concentrated. The resultant cloudy liquid was re-dissolved in  $\text{Et}_2\text{O}$  (5 mL) and passed through a short column of basic alumina, eluting with  $\text{Et}_2\text{O}$  (3 x 5 mL). Subsequent removal of the solvent under reduced pressure afforded bis(4-methoxyphenyl)phosphine as a colourless oil (1.10 g, 4.47 mmol, 99%).

$^1\text{H}$  NMR (400 MHz,  $\text{C}_6\text{D}_6$ )  $\delta$  7.42 – 7.37 (m, 4H), 6.72 – 6.68 (m, 4H), 5.30 (d,  $J = 214.3$  Hz, 1H), 3.22 (s, 6H).  $^{13}\text{C}$  NMR (101 MHz,  $\text{C}_6\text{D}_6$ )  $\delta$  160.7, 135.9 (d,  $J = 18.5$  Hz), 126.5 (d,  $J = 8.4$  Hz), 114.7 (d,  $J = 7.1$  Hz), 54.7.  $^{31}\text{P}$  NMR (162 MHz,  $\text{C}_6\text{D}_6$ )  $\delta$  -44.9.

Spectroscopic data in agreement with that reported by Senanayake, C. H. *et al.*<sup>10</sup>

### Bis(2-(bis(4-methoxyphenyl)phosphaneyl)ethyl)amine, MACHO $^{p(\text{OMe})}$

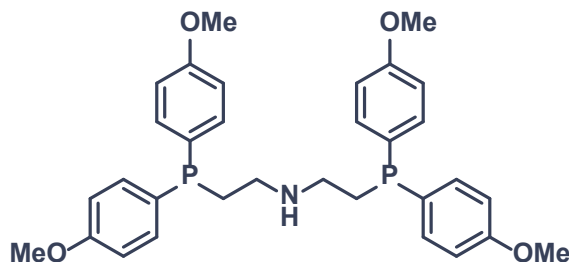

Inside a glovebox, a COtube charged with bis(4-methoxyphenyl)phosphine (542 mg, 2.20 mmol) was added THF (15 mL) and *t*BuOK (673 mg, 6.00 mmol). The resultant deep red solution was stirred at ambient temperature for 15 minutes prior to the addition of bis(2-chloroethyl)amine hydrochloride (178 mg, 1.00 mmol). The COtube was sealed, and the reaction mixture was refluxed overnight. After reaching ambient temperature, the reaction mixture was diluted with  $\text{Et}_2\text{O}$  (10 mL) and subsequently quenched with water (10 mL). The organic layer was separated, and the aqueous phase was extracted with  $\text{Et}_2\text{O}$  (3 x 10 mL). The combined organic phases were dried over anhydrous  $\text{Na}_2\text{SO}_4$ , filtered, and concentrated. Outside the glovebox, purification via AFCC using degassed solvents (heptane to EtOAc) afforded MACHO $^{p(\text{OMe})}$  as a yellow oil (258 mg, 460  $\mu\text{mol}$ , 46%). The compound was immediately transferred back into the glovebox after isolation.

$^1\text{H}$  NMR (400 MHz,  $\text{CDCl}_3$ )  $\delta$  7.35 – 7.30 (m, 8H), 6.88 – 6.84 (m, 8H), 3.79 (s, 12H), 3.12 (bs, 1H), 2.72 – 2.66 (m, 4H), 2.17 – 2.13 (m, 4H).  $^{13}\text{C}$  NMR (101 MHz,  $\text{CDCl}_3$ )  $\delta$  160.3, 134.2 (d,  $J = 20.2$  Hz),

129.4 (d,  $J = 9.7$  Hz), 114.3 (d,  $J = 7.7$  Hz), 55.3, 46.3 (d,  $J = 21.2$  Hz), 29.3 (d,  $J = 11.3$  Hz).  $^{31}\text{P}$  NMR (162 MHz,  $\text{CDCl}_3$ )  $\delta$  -24.6.

Spectroscopic data in agreement with that reported by Liu, W. *et al.*<sup>3</sup>

#### Ru-MACHO<sup>p(OMe)</sup>

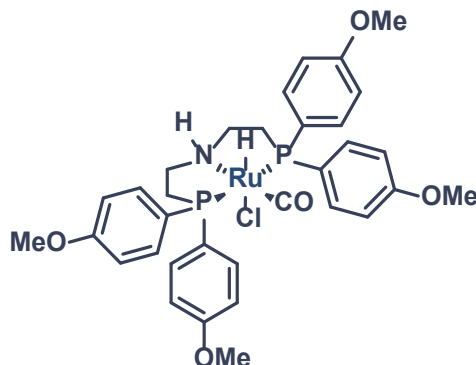

Inside a glovebox, to a COtube charged with MACHO<sup>p(OMe)</sup> (29.5 mg, 52.5  $\mu\text{mol}$ ) was added carbonylchlorohydridotris(triphenylphosphine)ruthenium(II) (47.6 mg, 50.0  $\mu\text{mol}$ ) and toluene (0.45 mL). The COtube was sealed, and the reaction mixture was stirred at reflux for 5 h. After reaching ambient temperature, white precipitate could be observed, and the reaction mixture was diluted with  $\text{Et}_2\text{O}$  (5 mL). The solvent was decanted off and the solids rinsed with  $\text{Et}_2\text{O}$  (5 mL) and pentane which were decanted off, after which the solids were dried in vacuo to afford Ru-MACHO<sup>p(OMe)</sup> as a white solid (30.4 mg, 41.8  $\mu\text{mol}$ , 84%).

$^1\text{H}$  NMR (400 MHz,  $\text{CDCl}_3$ )  $\delta$  7.79 – 7.70 (m, 8H), 6.93 – 6.90 (m, 8H), 3.96 (bs, 1H), 3.81 (s, 6H), 3.79 (s, 6H), 3.40 – 3.29 (m, 2H), 2.86 – 2.84 (m, 2H), 2.50 – 2.43 (m, 4H), -15.55 (t,  $J = 19.5$  Hz, 1H).  $^{13}\text{C}$  NMR (101 MHz,  $\text{CDCl}_3$ )  $\delta$  161.0, 161.0, 135.0 (t,  $J = 7.2$  Hz), 134.2 (t,  $J = 7.3$  Hz), 128.9 (t,  $J = 25.1$  Hz), 125.7 (t,  $J = 23.1$  Hz), 114.1 (t,  $J = 5.5$  Hz), 114.0 (t,  $J = 5.5$  Hz), 55.4, 55.3, 52.4 (t,  $J = 5.2$  Hz), 32.5 (t,  $J = 11.2$  Hz).  $^{31}\text{P}$  NMR (162 MHz,  $\text{CDCl}_3$ )  $\delta$  48.9 (d,  $J = 8.1$  Hz). HRMS (ESI<sup>+</sup>)  $m/z$  Calcd for  $\text{C}_{33}\text{H}_{38}\text{NO}_5\text{P}_2\text{Ru}$  [M - Cl]<sup>+</sup> 692.1269; Found 692.1283.

#### Ru-MACHO<sup>Et</sup>

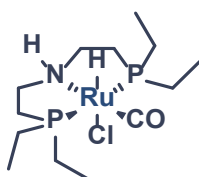

Inside a glovebox, to a COtube charged with MACHO<sup>Et</sup> (52.4 mg, 210  $\mu\text{mol}$ ) was added carbonylchlorohydridotris(triphenylphosphine)ruthenium(II) (190.0 mg, 200  $\mu\text{mol}$ ) and toluene (2.0 mL). The reaction mixture was stirred at reflux for 5 h. After reaching ambient temperature, the reaction mixture was added pentane (4 mL). The suspension was sonicated for 30 minutes, centrifuged, and the solvent decanted off. The remaining solids were suspended in  $\text{Et}_2\text{O}$  (5 mL) and sonicated for 30 minutes. The suspension was centrifuged, filtered, and the precipitate rinsed with  $\text{Et}_2\text{O}$  (2 x 5 mL). The solids were collected and dried in vacuo to afford Ru-MACHO<sup>Et</sup> as a white solid (63.1 mg, 152  $\mu\text{mol}$ , 76%).

$^1\text{H}$  NMR (400 MHz,  $\text{CD}_3\text{Cl}$ )  $\delta$  3.35 – 3.19 (m, 3H), 2.19 – 1.99 (m, 6H), 1.92 – 1.78 (m, 4H), 1.75 – 1.66 (m, 2H), 1.26 – 1.14 (m, 12H), -16.73 (t,  $J = 19.1$  Hz, 1H).  $^{13}\text{C}$  NMR (101 MHz,  $\text{CD}_3\text{Cl}$ )  $\delta$  206.7 (t,  $J = 12.0$  Hz), 53.0 (t,  $J = 5.1$  Hz), 29.2 (t,  $J = 10.2$  Hz), 22.5 (t,  $J = 13.9$  Hz), 17.4 (t,  $J = 12.2$  Hz), 8.7 (d,  $J = 6.0$  Hz).  $^{31}\text{P}$  NMR (162 MHz,  $\text{CD}_3\text{Cl}$ )  $\delta$  53.8 (bs). HRMS (ESI<sup>+</sup>)  $m/z$  Calcd for  $\text{C}_{13}\text{H}_{30}\text{NOP}_2\text{Ru}$  [M - Cl]<sup>+</sup> 380.0846; Found 380.0844.

## Ru-MACHO<sup>iPr</sup>

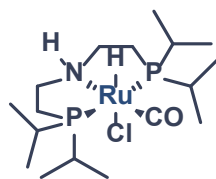

Inside a glovebox, to a COtube charged with MACHO<sup>iPr</sup> (197 mg, 646  $\mu\text{mol}$ ) was added carbonylchlorohydridotris(triphenylphosphine)ruthenium(II) (585 mg, 615  $\mu\text{mol}$ ) and toluene (10 mL). The reaction mixture was stirred at reflux for 5 h. After reaching ambient temperature, the reaction mixture was added pentane (30 mL) to precipitate out the complex. The suspension was sonicated for 30 minutes followed by filtering off the precipitate and rinsed with pentane (2 x 5.0 mL). The solids were collected and dried in vacuo overnight, affording Ru-MACHO<sup>iPr</sup> as a white solid (223 mg, 474  $\mu\text{mol}$ , 77%).

<sup>1</sup>H NMR (400 MHz, CD<sub>2</sub>Cl<sub>2</sub>)  $\delta$  3.42 – 3.36 (m, 1H), 3.29 – 3.15 (m, 2H), 2.72 – 2.60 (m, 2H), 2.33 – 2.11 (m, 6H), 1.81 – 1.71 (m, 2H), 1.45 – 1.39 (m, 6H), 1.27 – 1.22 (m, 6H), 1.20 – 1.15 (m, 6H), 1.13 – 1.07 (m, 6H), -16.10 (t,  $J$  = 19.2 Hz, 0.08H), -16.31 (t,  $J$  = 17.9 Hz, 0.92H). <sup>13</sup>C NMR (101 MHz, CD<sub>2</sub>Cl<sub>2</sub>)  $\delta$  208.3 (t,  $J$  = 11.7 Hz), 54.3 (t,  $J$  = 4.8 Hz), 30.2 (t,  $J$  = 9.0 Hz), 27.1 (t,  $J$  = 11.2 Hz), 24.1 (t,  $J$  = 12.5 Hz), 20.9 (m), 19.0 (t,  $J$  = 1.1 Hz), 17.5 (d,  $J$  = 1.8 Hz). <sup>31</sup>P NMR (162 MHz, CD<sub>2</sub>Cl<sub>2</sub>)  $\delta$  76.8 (0.16P), 76.7 (1.84P). HRMS (ESI<sup>+</sup>)  $m/z$  Calcd for C<sub>17</sub>H<sub>38</sub>NOP<sub>2</sub>Ru [M - Cl]<sup>+</sup> 436.1472; Found 436.1481.

Spectroscopic data in agreement with that reported by Oestreich, M. *et al.*<sup>11</sup>

## Ru-MACHO<sup>tBu</sup>

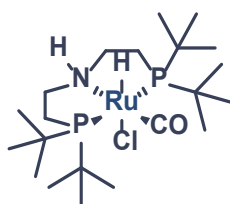

Inside a glovebox, to a COtube charged with MACHO<sup>tBu</sup> (75.9 mg, 210  $\mu\text{mol}$ ) was added carbonylchlorohydridotris(triphenylphosphine)ruthenium(II) (190.0 mg, 200  $\mu\text{mol}$ ) and diglyme (2.0 mL). The reaction mixture was stirred at 165 °C for 19 h. After reaching ambient temperature, the reaction mixture was added pentane (4 mL). The suspension was sonicated for 30 minutes, centrifuged, and the solvent decanted off. The remaining solids were suspended in Et<sub>2</sub>O (5 mL) and sonicated for 30 minutes. The suspension was centrifuged, filtered, and the precipitate rinsed with Et<sub>2</sub>O (2 x 5 mL). The solids were collected and dried in vacuo to afford Ru-MACHO<sup>tBu</sup> as a light grey solid (88.6 mg, 168  $\mu\text{mol}$ , 84%).

<sup>1</sup>H NMR (400 MHz, CD<sub>2</sub>Cl<sub>2</sub>)  $\delta$  5.25 (bs, 1H), 3.36 – 3.23 (m, 2H), 2.46 – 2.35 (m, 2H), 2.20 – 2.04 (m, 4H), 1.42 – 1.39 (m, 18H), 1.34 – 1.31 (m, 18H), -15.82 (t,  $J$  = 20.0 Hz, 0.19H), -18.63 (t,  $J$  = 20.0, 0.72H). <sup>13</sup>C NMR (101 MHz, CD<sub>2</sub>Cl<sub>2</sub>)  $\delta$  207.9 (t,  $J$  = 11.6 Hz), 53.5 (t,  $J$  = 4.1 Hz), 38.7 (t,  $J$  = 6.4 Hz), 36.7 (t,  $J$  = 10.8 Hz), 31.2 (t,  $J$  = 2.9 Hz), 31.0 (t,  $J$  = 2.7 Hz), 30.1 (t,  $J$  = 2.3 Hz), 25.8 (t,  $J$  = 5.8 Hz). <sup>31</sup>P NMR (162 MHz, CD<sub>2</sub>Cl<sub>2</sub>)  $\delta$  87.0 (d,  $J$  = 8.0 Hz, 0.35P), 86.7 (d,  $J$  = 5.9 Hz, 1.65P). HRMS (ESI<sup>+</sup>)  $m/z$  Calcd for C<sub>21</sub>H<sub>46</sub>NOP<sub>2</sub>Ru [M - Cl]<sup>+</sup> 492.2098; Found 492.2115.

Spectroscopic data in agreement with that reported by Ogata, O. *et al.*<sup>12</sup>

## Ru-MACHO<sup>Cy</sup>

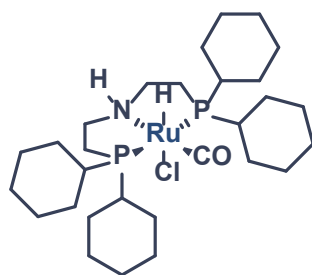

Inside a glovebox, to a COtube charged with MACHO<sup>Cy</sup> (195.6 mg, 420  $\mu\text{mol}$ ) was added carbonylchlorohydridotris(triphenylphosphine)ruthenium(II) (380.6 mg, 400  $\mu\text{mol}$ ) and diglyme (4.0 mL). The reaction mixture was stirred at 165  $^{\circ}\text{C}$  for 19 h. After reaching ambient temperature, the reaction mixture was added pentane (10 mL) to precipitate out the complex. The suspension was sonicated for 30 minutes, centrifuged, and the solvent decanted off. The remaining solids were suspended in Et<sub>2</sub>O (10 mL) and sonicated for 30 minutes. The suspension was centrifuged, filtered, and the precipitate rinsed with Et<sub>2</sub>O (2 x 10 mL). The solids were collected and dried in vacuo to afford Ru-MACHO<sup>Cy</sup> as a pale yellow solid (207.8 mg, 329  $\mu\text{mol}$ , 82%).

**<sup>1</sup>H NMR** (400 MHz, CDCl<sub>3</sub>)  $\delta$  3.55 – 3.51 (m, 0.34H), 3.26 – 3.12 (m, 2H), 2.91 – 2.77 (m, 0.68H), 2.52 – 2.11 (m, 8H), 1.97 – 1.22 (m, 42H), -16.39 (t,  $J$  = 19.6 Hz, 0.20H), -16.59 (t,  $J$  = 18.3 Hz, 0.71H). **<sup>13</sup>C NMR** (101 MHz, CD<sub>2</sub>Cl<sub>2</sub>)  $\delta$  208.4 (t,  $J$  = 11.8 Hz), 54.3 (t,  $J$  = 4.9 Hz), 37.6 (t,  $J$  = 10.7 Hz), 35.3 (t,  $J$  = 12.4 Hz), 31.3 (t,  $J$  = 2.5 Hz), 30.9 (t,  $J$  = 3.1 Hz), 29.1 (t,  $J$  = 9.2 Hz), 28.5 (t,  $J$  = 6.7 Hz), 28.5, 28.2, 27.7 (t,  $J$  = 4.1 Hz), 27.3 (t,  $J$  = 5.2 Hz), 27.0 (t,  $J$  = 6.5 Hz), 26.9, 26.5. **<sup>31</sup>P NMR** (162 MHz, CDCl<sub>3</sub>)  $\delta$  65.3 (d,  $J$  = 5.9 Hz, 0.78P), 64.6 (d,  $J$  = 5.9 Hz, 0.22P). **HRMS** (ESI<sup>+</sup>)  $m/z$  Calcd for C<sub>29</sub>H<sub>54</sub>NOP<sub>2</sub>Ru [M - Cl]<sup>+</sup> 596.2724; Found 596.2733.

Spectroscopic data in agreement with that reported by Beller, M. *et al.*<sup>13</sup>

## Ru-MACHO<sup>Ad</sup>

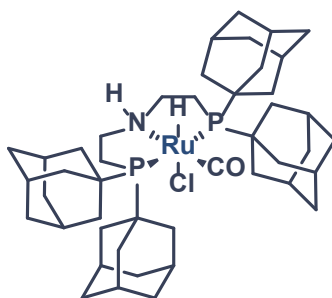

Inside a glovebox, to a COtube charged with MACHO<sup>Ad</sup> (79.0 mg, 116  $\mu\text{mol}$ ) was added carbonylchlorohydridotris(triphenylphosphine)ruthenium(II) (100.0 mg, 105  $\mu\text{mol}$ ) and diglyme (1.0 mL). The reaction mixture was stirred at 165  $^{\circ}\text{C}$  for 19 h. After reaching ambient temperature, the reaction mixture was added pentane (4 mL) to precipitate out the complex. The suspension was sonicated for 30 minutes, centrifuged, and the solvent decanted off. The remaining solids were suspended in Et<sub>2</sub>O (5 mL) and sonicated for 30 minutes. The suspension was centrifuged, filtered, and the precipitate rinsed with Et<sub>2</sub>O (2 x 5 mL). The solids were collected and dried in vacuo to afford Ru-MACHO<sup>Ad</sup> as a white solid (34.6 mg, 41  $\mu\text{mol}$ , 39%).

**<sup>1</sup>H NMR** (400 MHz, CD<sub>3</sub>Cl)  $\delta$  7.53 (bs, 1H), 3.67 – 3.54 (m, 2H), 2.50 – 1.57 (m, 66H), -26.05 (t,  $J$  = 15.4 Hz, 1H). **<sup>13</sup>C NMR** (101 MHz, CD<sub>3</sub>Cl)  $\delta$  55.1 (t,  $J$  = 3.8 Hz), 42.9 (t,  $J$  = 8.1 Hz), 40.1, 39.5, 39.2 (t,  $J$  = 8.6 Hz), 36.8, 36.7, 28.5 (t,  $J$  = 4.4 Hz), 28.3 (t,  $J$  = 4.3 Hz), 21.1 (t,  $J$  = 7.9 Hz). **<sup>31</sup>P NMR** (162

MHz, CD<sub>3</sub>Cl)  $\delta$  84.5 (d,  $J$  = 11.8 Hz). **HRMS** (ESI<sup>+</sup>)  $m/z$  Calcd for C<sub>45</sub>H<sub>70</sub>NOP<sub>2</sub>Ru [M - Cl]<sup>+</sup> 804.3976; Found 804.3987.

Spectroscopic data in agreement with that reported by Kuiling, D. *et al.*<sup>14</sup>

### Tris(2-(diphenylphosphino)ethyl)amine, NP<sub>3</sub>

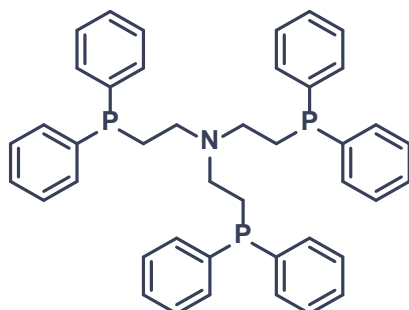

Inside a glovebox, to a COtube charged with *t*BuOK (1.81 g, 16.1 mmol) and THF (30 mL) was added diphenylphosphine (1.1 mL, 6.3 mmol) and the mixture was stirred for 10 minutes at room temperature. The mixture was added tris(2-chloroethyl)ammonium hydrochloride (501 mg, 2.08 mmol), the COtube sealed, and the reaction mixture heated to reflux for 20 h. The mixture was then cooled to ambient temperature and poured into degassed water in a round-bottomed flask. The flask was cooled to °C, leading to a precipitate. The precipitate was then filtered and rapidly washed with ethanol (2 x 10 mL). The white precipitate was dried in vacuo to yield NP<sub>3</sub> as a white solid (362.8 mg, 555  $\mu$ mol, 27%).

<sup>1</sup>H NMR (400 MHz, CDCl<sub>3</sub>)  $\delta$  7.34 – 7.23 (m, 30H), 2.53 – 2.47 (m, 6H), 1.98 – 1.94 (m, 6H). <sup>13</sup>C NMR (101 MHz, CDCl<sub>3</sub>)  $\delta$  138.6 (d,  $J$  = 12.9 Hz), 132.9 (d,  $J$  = 18.7 Hz), 128.7, 128.5 (d,  $J$  = 6.6 Hz), 49.5 (d,  $J$  = 22.8 Hz), 25.5 (d,  $J$  = 12.3 Hz). <sup>31</sup>P NMR (162 MHz, CDCl<sub>3</sub>)  $\delta$  -19.9.

### Ru-NP<sub>3</sub>

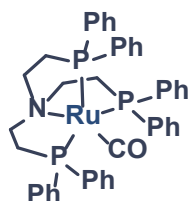

Inside a glovebox, a COtube was charged with Ru<sub>3</sub>(CO)<sub>12</sub> (32.4 mg, 50.7  $\mu$ mol), tris(2-(diphenylphosphanyl)ethyl)amine (100 mg, 153  $\mu$ mol), and toluene (3 mL). The COtube was sealed and the reaction mixture stirred at 135 °C for 16 h. After cooling to ambient temperature, an orange precipitate had formed. The reaction mixture was centrifuged, and the supernatant was removed inside the glovebox. The resulting solid was washed with benzene (2 x 3 mL). Benzene (2 mL) and methanol (0.25 mL) were then added, the COtube resealed, and the mixture heated to 80 °C for 3 h, affording a clear yellow solution. After cooling to ambient temperature, the solution was filtered through a 0.2  $\mu$ m PTFE syringe filter and the solvent removed in vacuo to afford Ru-NP<sub>3</sub> as an orange solid (79.6 mg, 102  $\mu$ mol, 67%).

Due to very poor solubility, the following data is only partially assigned, hence impurities appear more asserted and <sup>13</sup>C NMR data was not possible to obtain. <sup>1</sup>H NMR (400 MHz, C<sub>6</sub>D<sub>6</sub>)  $\delta$  7.57 – 7.51 (m, 8H), 7.37 – 7.35 (m, 2H), 7.09 – 6.96 (m, 12H), 6.81 – 6.54 (m, 6H), 2.15 – 1.98 (m, 8H), 1.65 – 1.61 (m, 4H). <sup>31</sup>P NMR (162 MHz, C<sub>6</sub>D<sub>6</sub>)  $\delta$  55.3.

Spectroscopic data in agreement with that reported by Schaub, T. *et al.*<sup>15</sup>

## References

- 1 Kuriyama, W., Matsumoto, T., Ino, Y. & Ogata, O. Noval ruthenium carbonyl complex having tridentate ligand, its production method and use. US2011237814A1 (2011).
- 2 Barrett, A. N. *et al.* Hydrogen/Halogen Exchange of Phosphines for the Rapid Formation of Cyclopolyphosphines. *Inorg. Chem.* **60**, 16826–16833 (2021).
- 3 Guo, J., Tang, J., Xi, H., Zhao, S.-Y. & Liu, W. Manganese catalyzed urea and polyurea synthesis using methanol as C1 source. *Chin. Chem. Lett.* **34**, 107731 (2023).
- 4 Fehring, V. *et al.* Synthesis of achiral, but unsymmetric, seven-membered rhodium(I)-chelates for hydrogenation in the chiral environment of alkyl polyglucoside micelles. *J. Organomet. Chem.* **621**, 120–129 (2001).
- 5 Zhang, Y.-K., Zhou, Y., Liu, C., Liu, C. Y. & Aubrey, M. Chemical Compounds. WO2021061823A1 (2021).
- 6 Cao, Z. *et al.* Silica-Supported Phosphine–Gold Complexes as an Efficient Catalytic System for a Dearomative Spirocyclization. *Chem. Eur. J.* **27**, 427–433 (2021).
- 7 Yang, X. *et al.* Synthesis of (Deoxy)difluoromethylated Phosphines by Reaction of R<sub>2</sub>P(O)H with TMSCF<sub>3</sub> and Their Application in Cu(I) Clusters in Sonogashira Coupling. *J. Org. Chem.* **87**, 7720–7733 (2022).
- 8 Wang, Y. *et al.* Sequential KOtBu/FeCl<sub>3</sub>-catalyzed reductive phosphonylation of tertiary amides for the synthesis of  $\alpha$ -amino phosphonates and phosphines. *Org. Biomol. Chem.* **21**, 2955–2959 (2023).
- 9 Li, C.-J. *et al.* Copper-catalyzed C–P cross-coupling of secondary phosphines with (hetero)aromatic bromide. *Res. Chem. Intermed.* **44**, 4547–4562 (2018).
- 10 Busacca, C. A. *et al.* A Superior Method for the Reduction of Secondary Phosphine Oxides. *Org. Lett.* **7**, 4277–4280 (2005).
- 11 Seliger, J. & Oestreich, M. Dynamic Kinetic Resolution of Alcohols by Enantioselective Silylation Enabled by Two Orthogonal Transition-Metal Catalysts. *Angew. Chem. Int. Ed.* **60**, 247–251 (2021).
- 12 Hideki, N. & Ogata, O. Method for alkylation of amines. US2016009632A1 (2016).
- 13 Nielsen, M. *et al.* Low-temperature aqueous-phase methanol dehydrogenation to hydrogen and carbon dioxide. *Nature* **495**, 85–89 (2013).
- 14 Han, Z. *et al.* Catalytic Hydrogenation of Cyclic Carbonates: A Practical Approach from CO<sub>2</sub> and Epoxides to Methanol and Diols. *Angew. Chem. Int. Ed.* **51**, 13041–13045 (2012).
- 15 Anaby, A. *et al.* Study of Precatalyst Degradation Leading to the Discovery of a New Ru<sup>0</sup> Precatalyst for Hydrogenation and Dehydrogenation. *Organometallics* **37**, 2193–2201 (2018).

# NMR Spectra

**<sup>1</sup>H NMR (400 MHz, CD<sub>2</sub>Cl<sub>2</sub>) spectrum of Ru-MACHO<sup>Ph</sup>.**

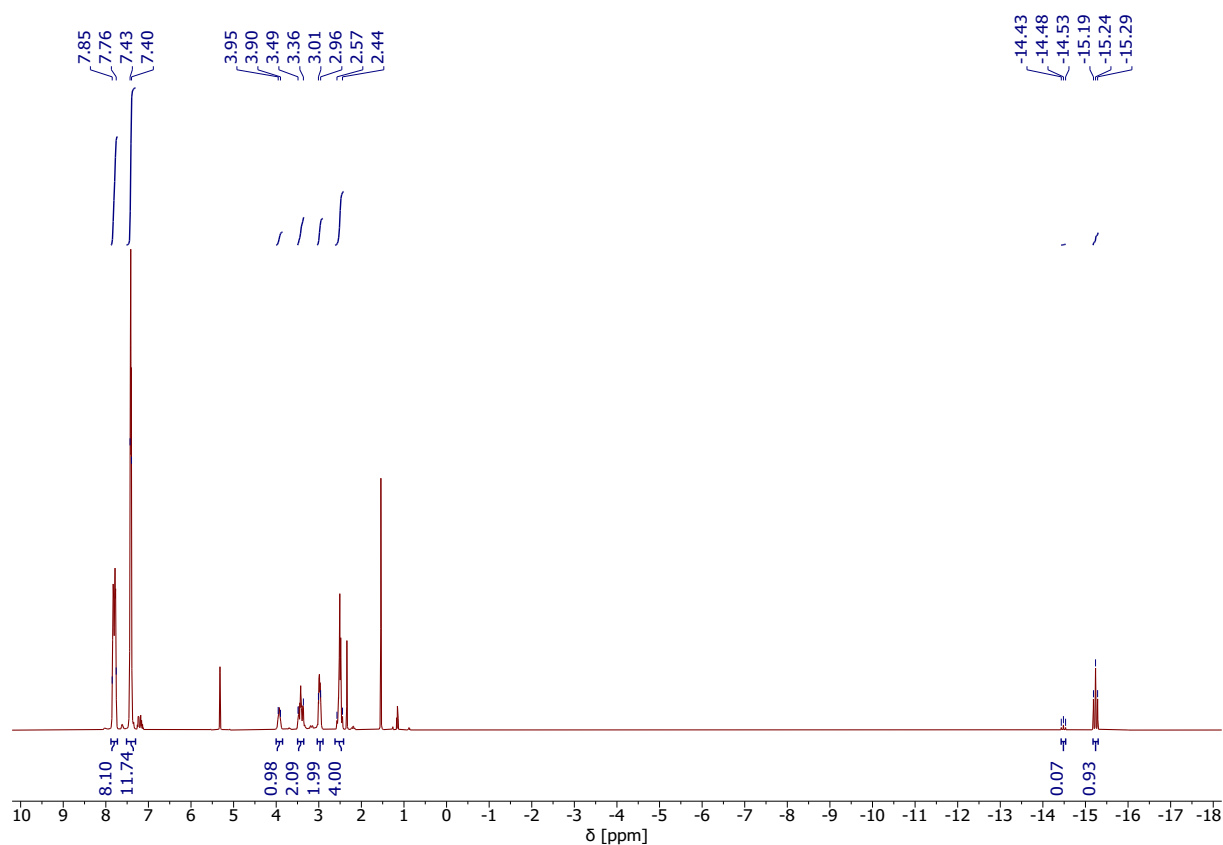

**<sup>13</sup>C NMR (101 MHz, CD<sub>2</sub>Cl<sub>2</sub>) spectrum of Ru-MACHO<sup>Ph</sup>.**

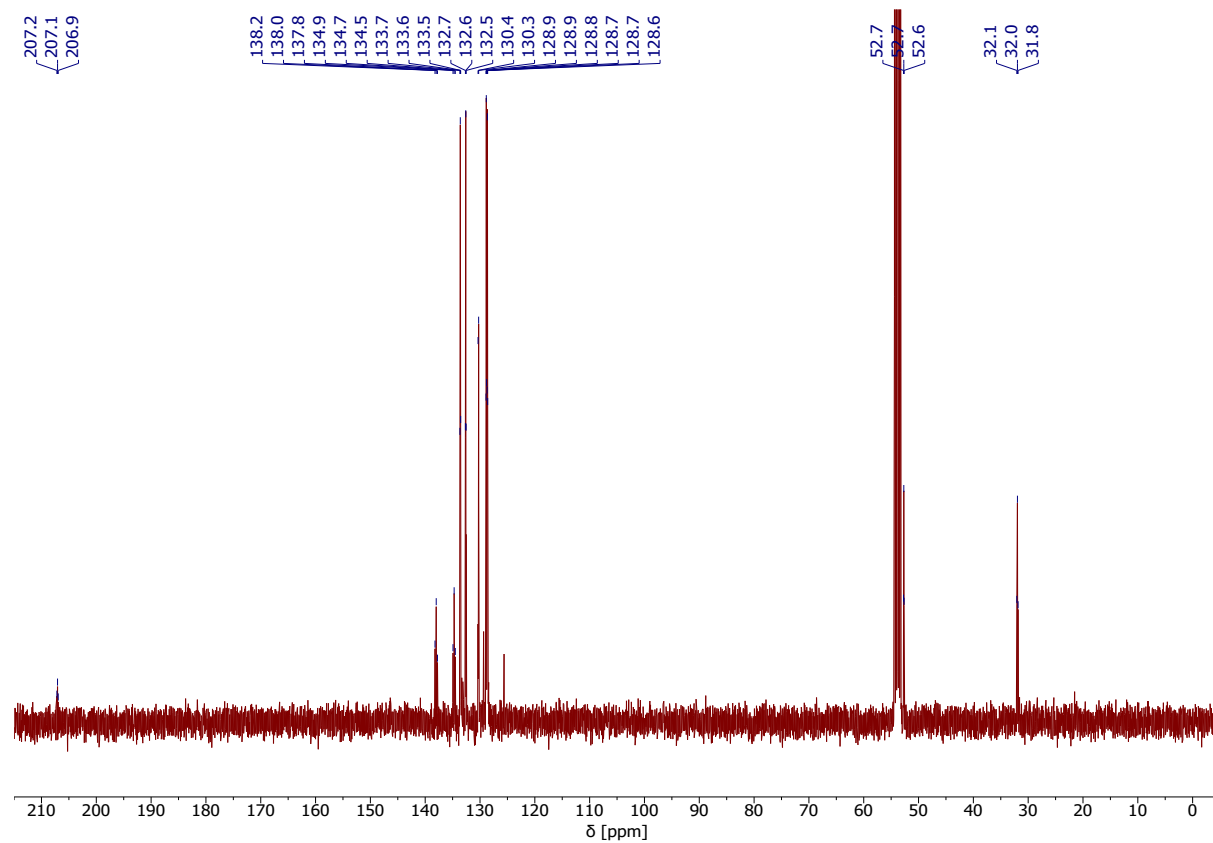

**<sup>31</sup>P NMR (162 MHz, CD<sub>2</sub>Cl<sub>2</sub>) spectrum of Ru-MACHO<sup>Ph</sup>.**

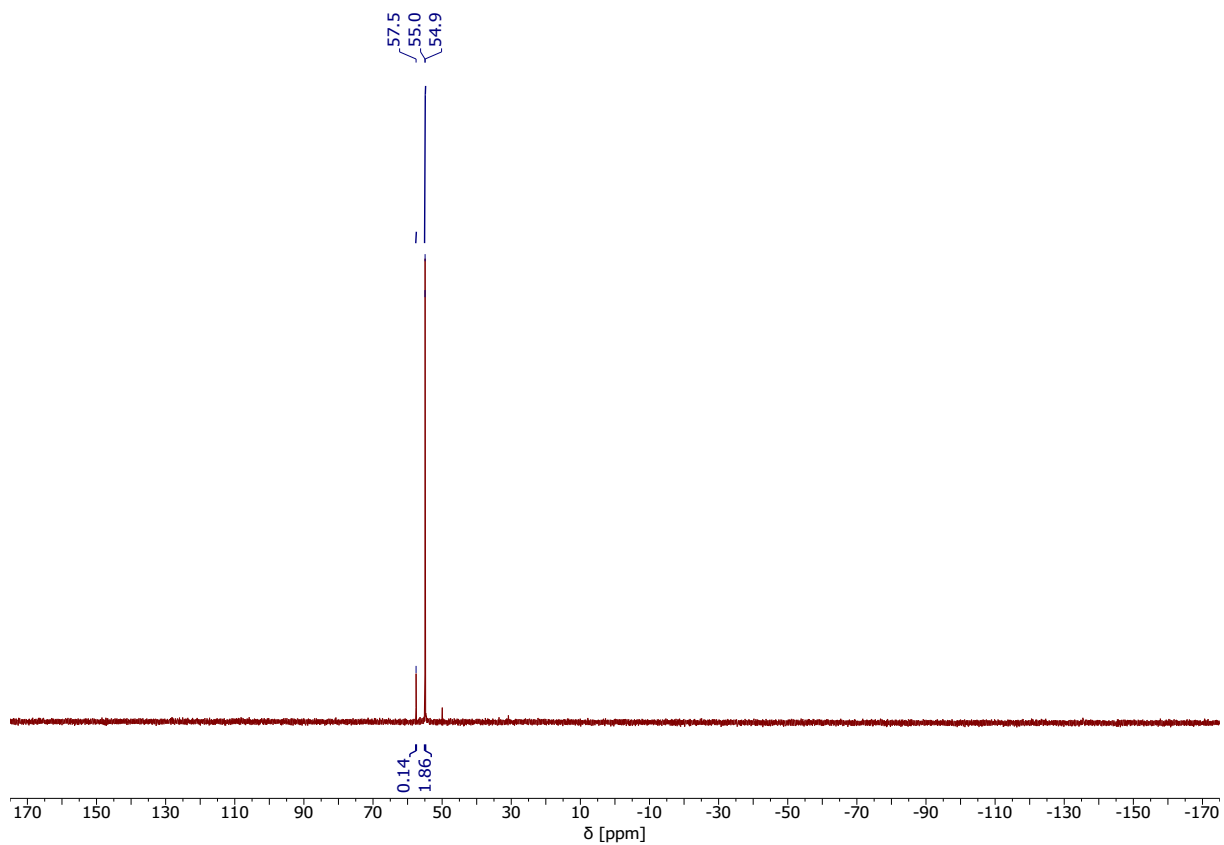

$^1\text{H}$  NMR (400 MHz,  $\text{CDCl}_3$ ) spectrum of **MACHO**<sup>p</sup>(Me).

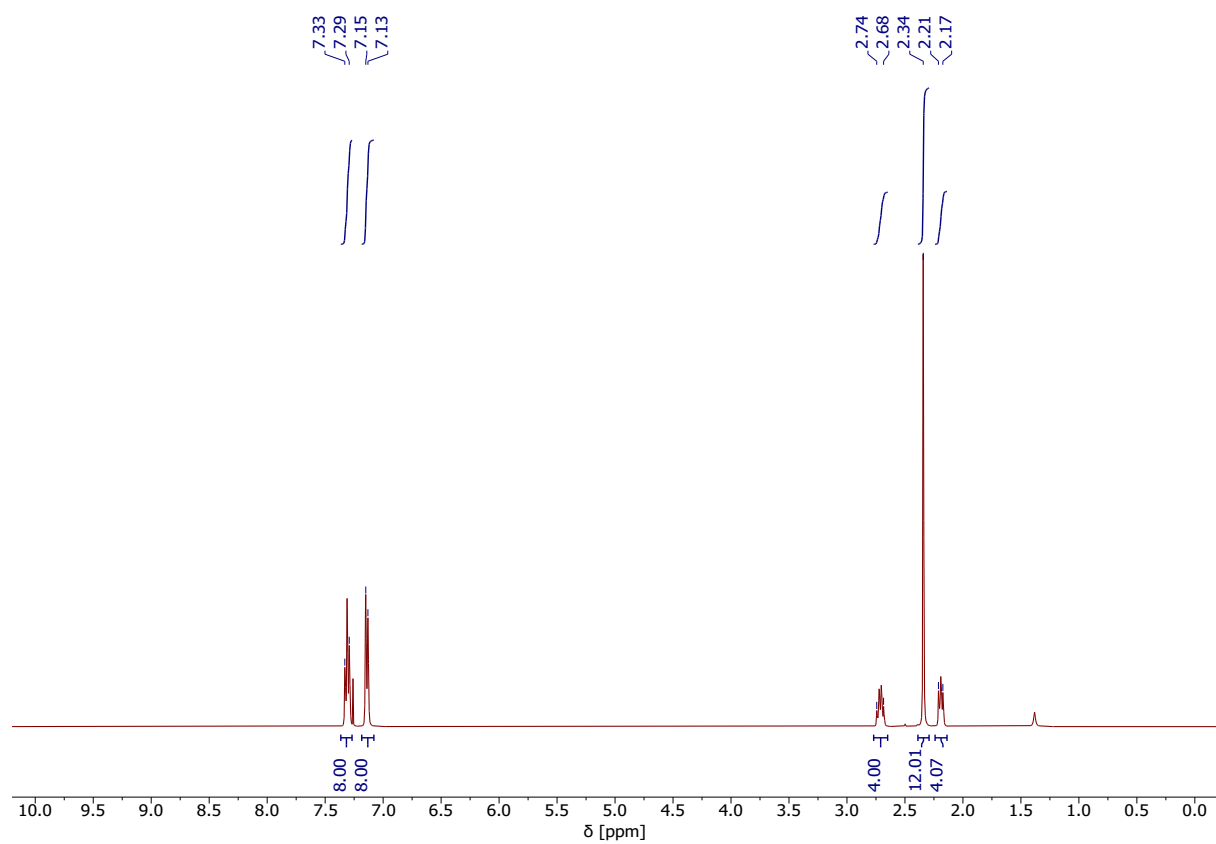

$^{13}\text{C}$  NMR (101 MHz,  $\text{CDCl}_3$ ) spectrum of **MACHO**<sup>p</sup>(Me).

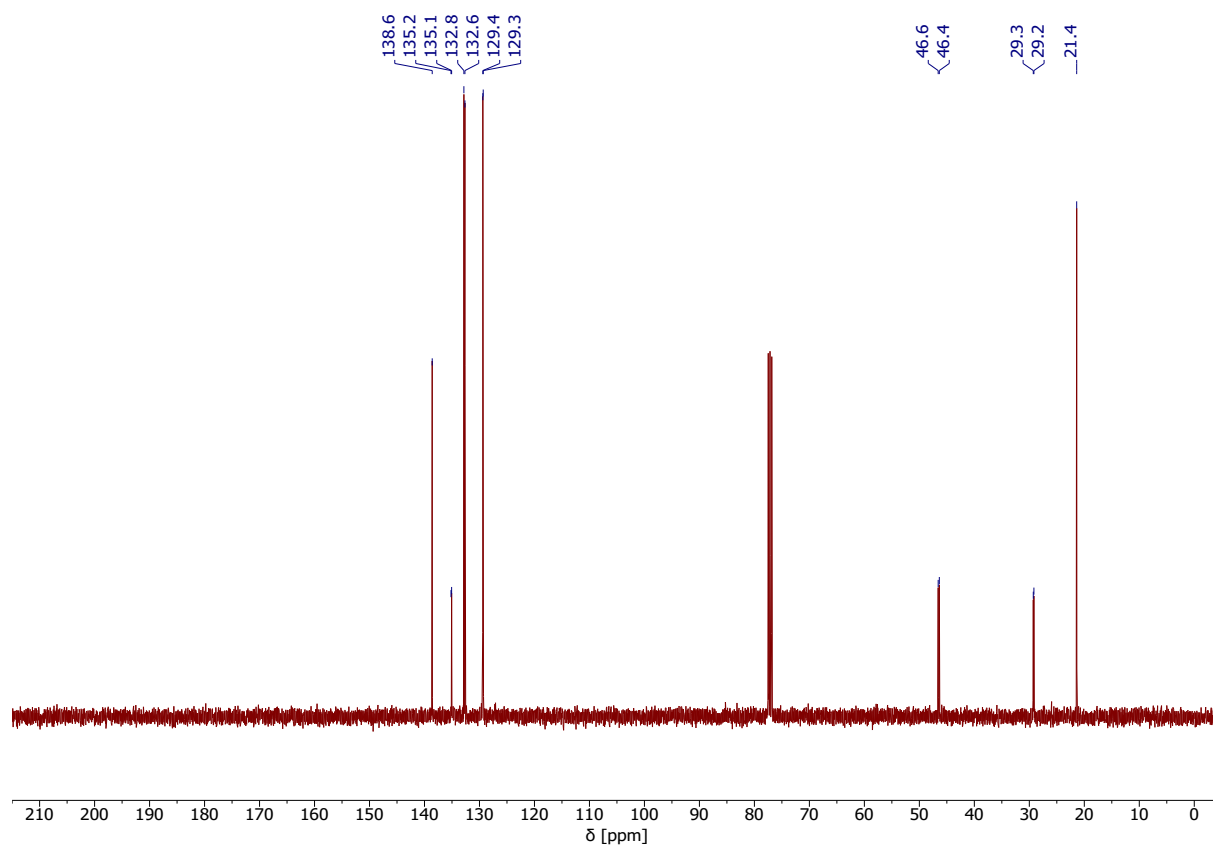

$^{31}\text{P}$  NMR (162 MHz,  $\text{CDCl}_3$ ) spectrum of **MACHO**<sup>p(Me)</sup>.

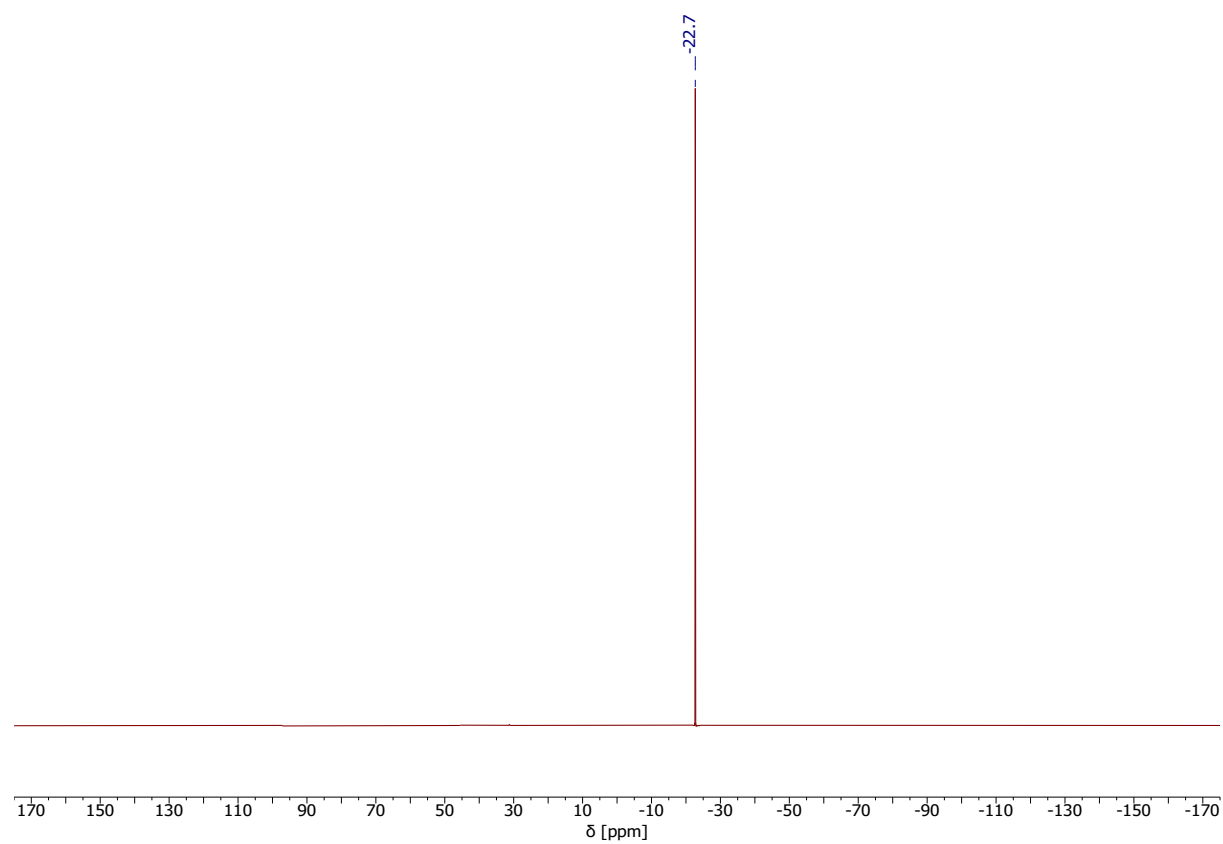

$^1\text{H}$  NMR (400 MHz,  $\text{C}_6\text{D}_6$ ) spectrum of **Ru-MACHO**<sup>p(Me)</sup>.

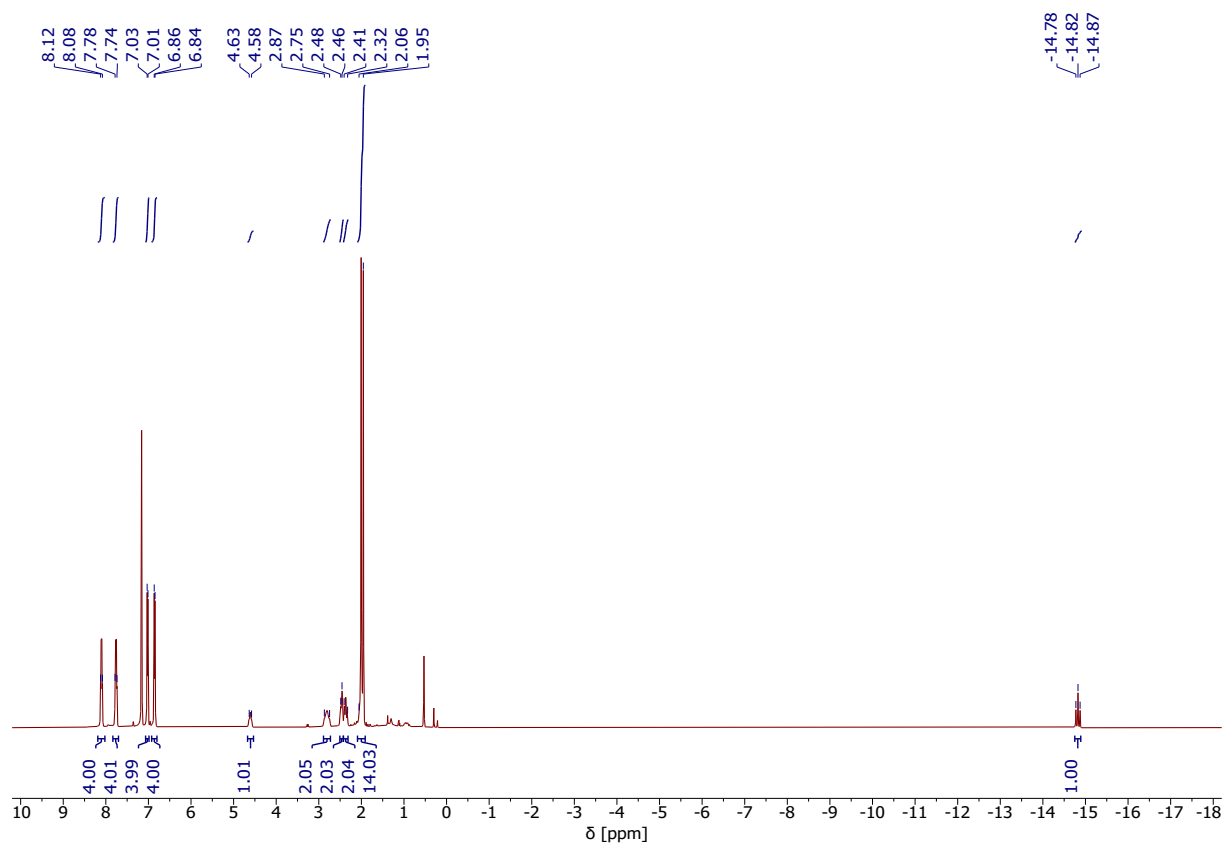

$^{13}\text{C}$  NMR (101 MHz,  $\text{C}_6\text{D}_6$ ) spectrum of **Ru-MACHO**<sup>p(Me)</sup>.

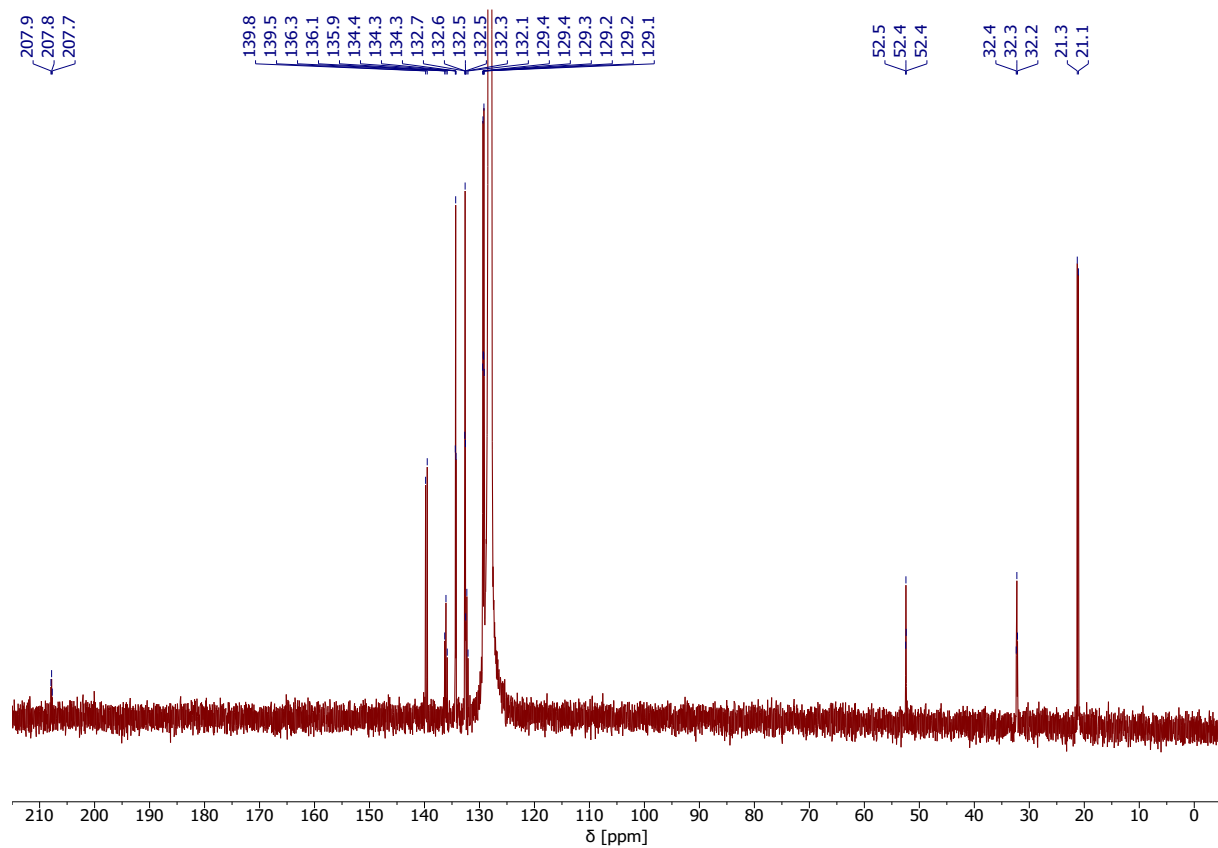

$^{31}\text{P}$  NMR (162 MHz,  $\text{C}_6\text{D}_6$ ) spectrum of **Ru-MACHO**<sup>p(Me)</sup>.

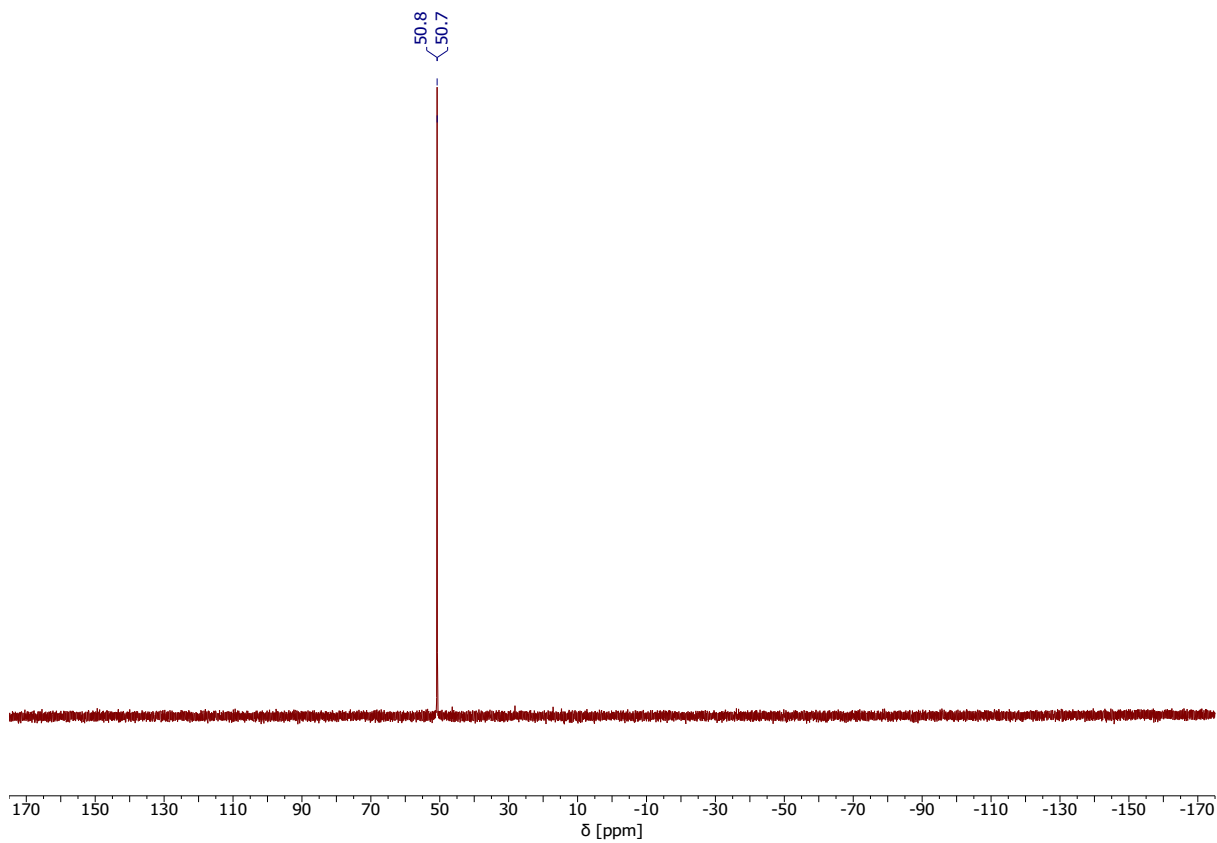

$^1\text{H}$  NMR (400 MHz,  $\text{C}_7\text{D}_8$ ) spectrum of  $\text{MACHO}^{m,m}(\text{Me})$ .

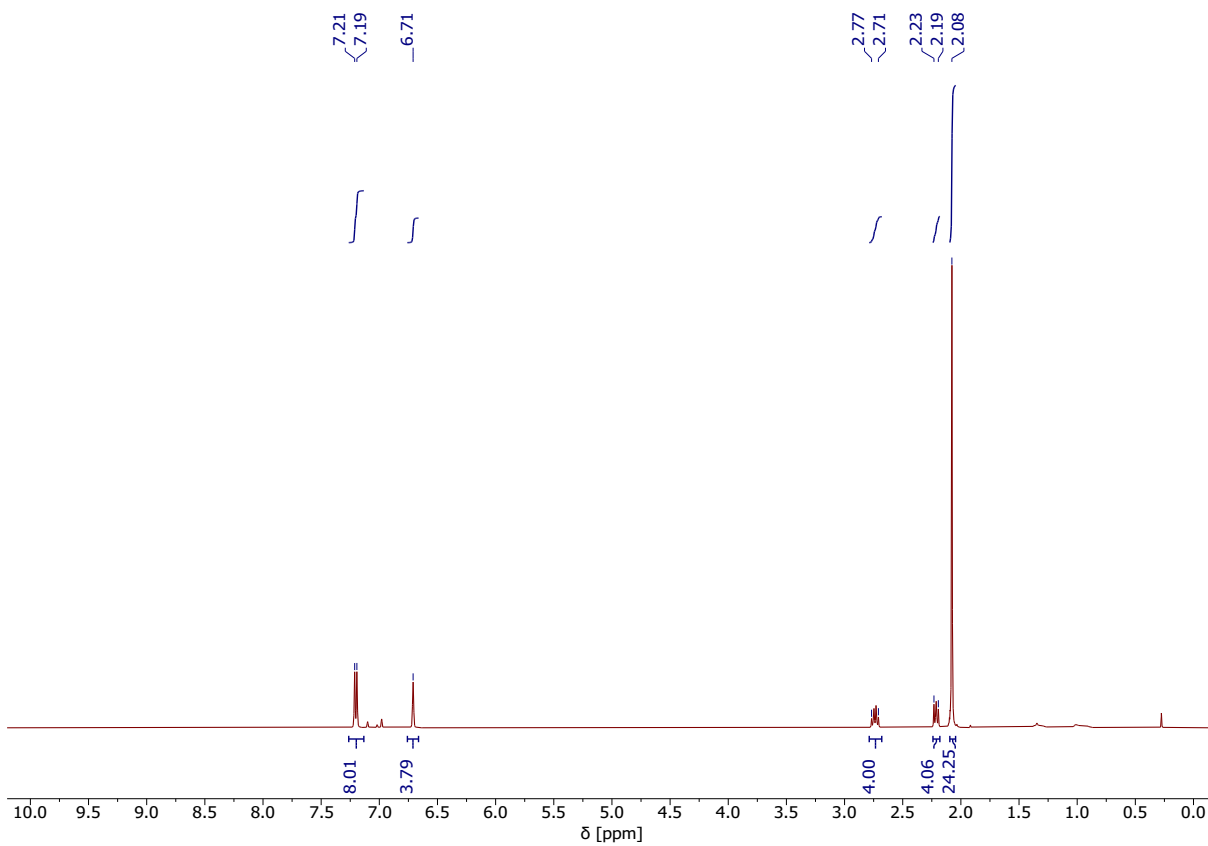

$^{13}\text{C}$  NMR (101 MHz,  $\text{C}_7\text{D}_8$ ) spectrum of  $\text{MACHO}^{m,m}(\text{Me})$ .

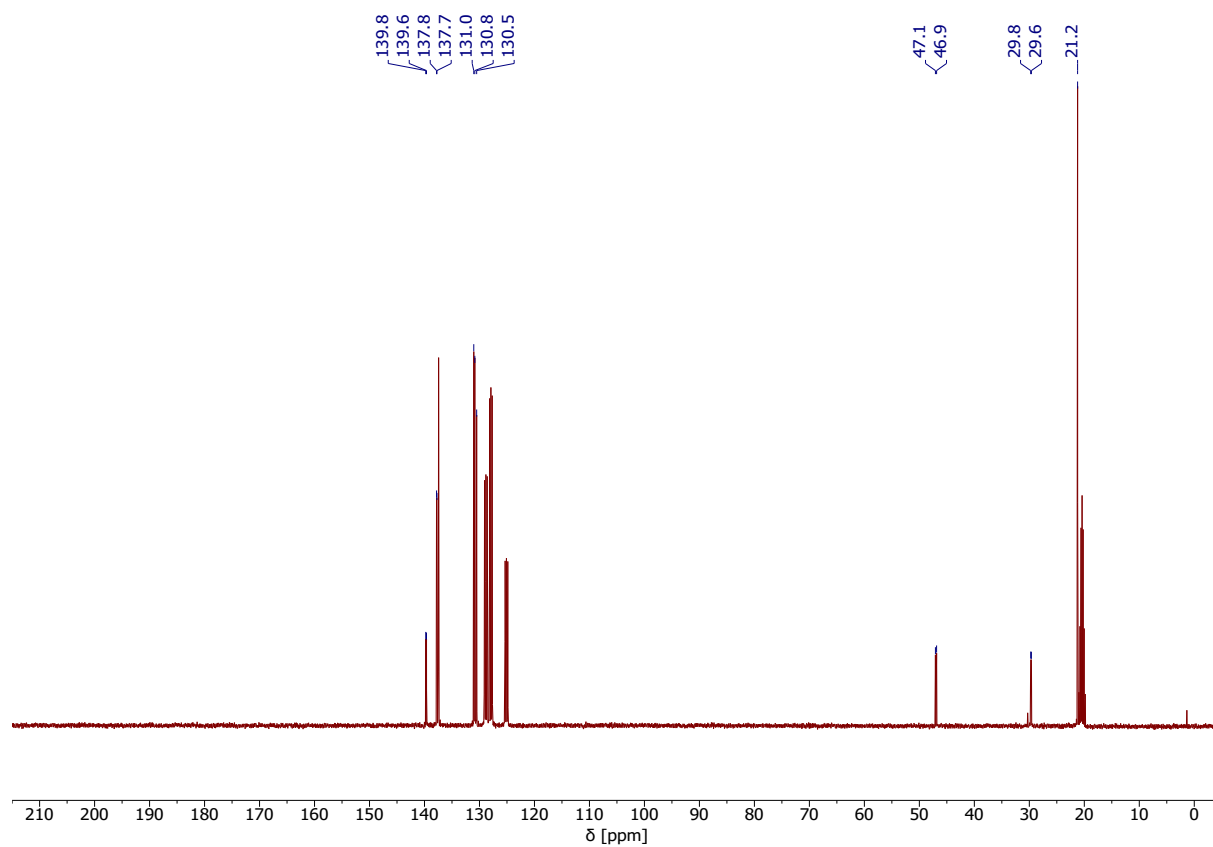

$^{31}\text{P}$  NMR (162 MHz,  $\text{C}_7\text{D}_8$ ) spectrum of **MACHO**<sup>*m,m*</sup>(Me).

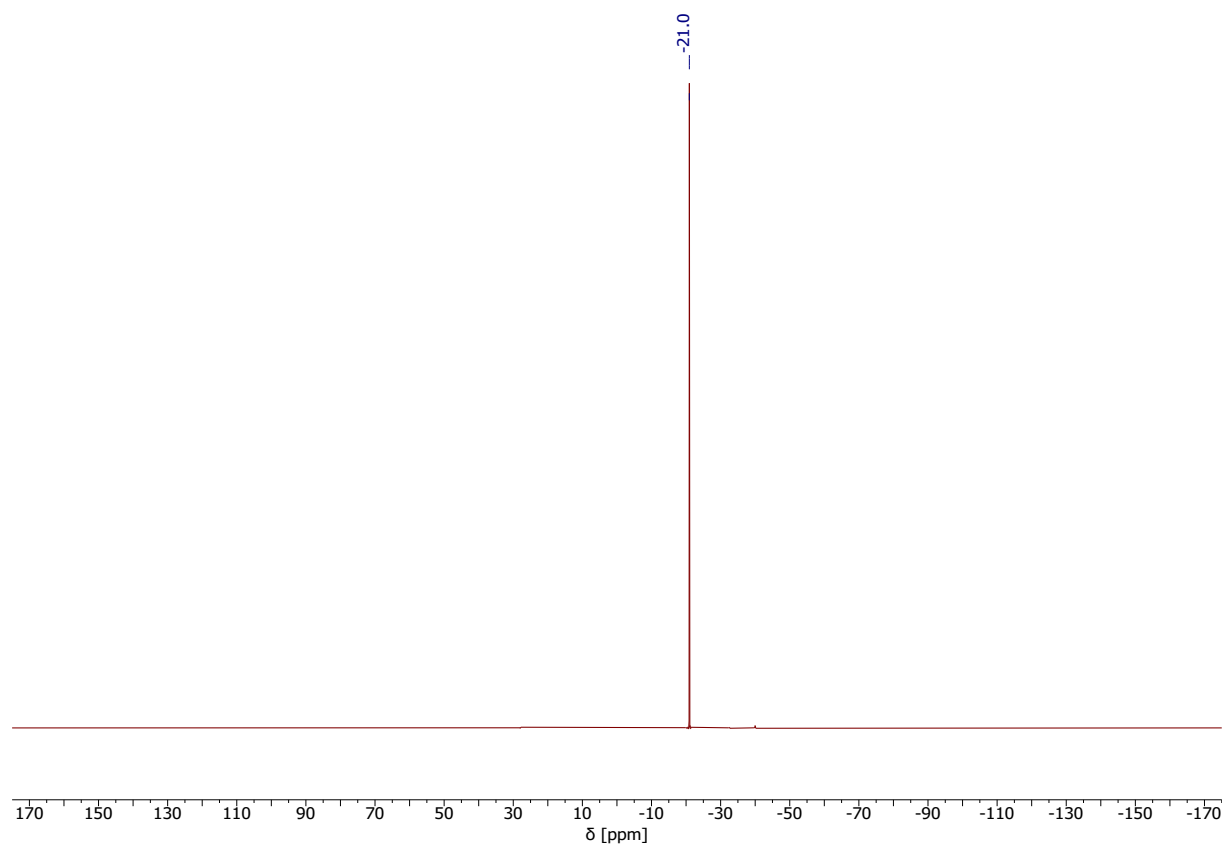

$^1\text{H}$  NMR (400 MHz,  $\text{C}_6\text{D}_6$ ) spectrum of **Ru-MACHO**<sup>*m,m*</sup>(Me).

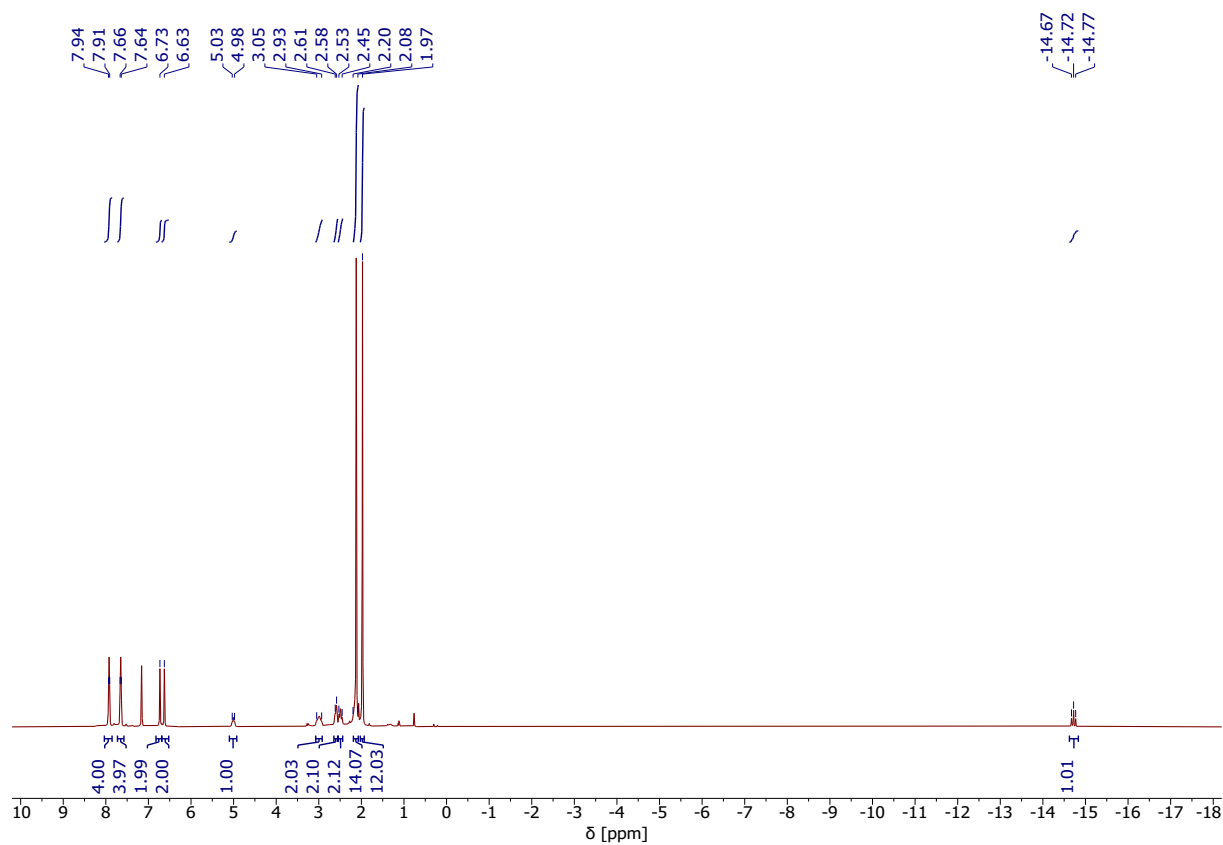

$^{13}\text{C}$  NMR (101 MHz,  $\text{C}_6\text{D}_6$ ) spectrum of **Ru-MACHO<sup>m,m</sup>(Me)**.

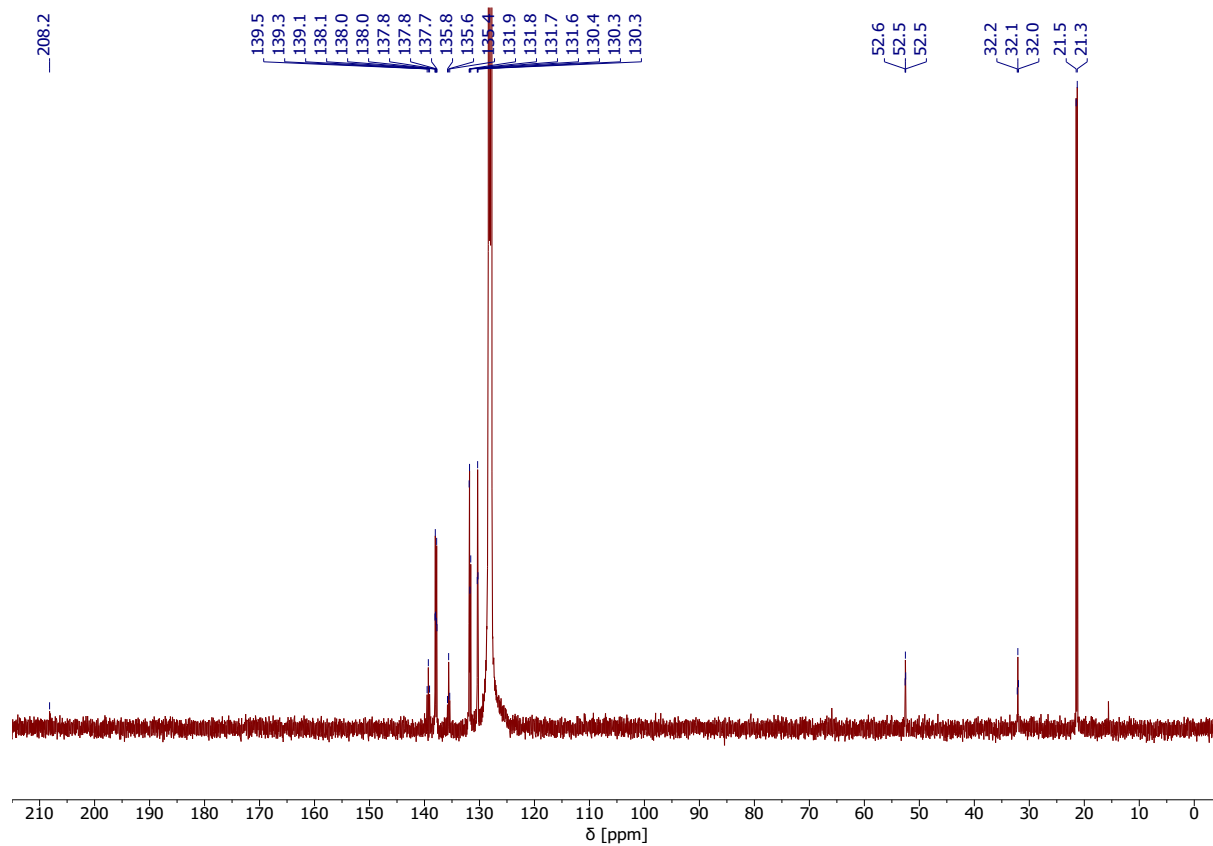

$^{31}\text{P}$  NMR (162 MHz,  $\text{C}_6\text{D}_6$ ) spectrum of **Ru-MACHO<sup>m,m</sup>(Me)**.

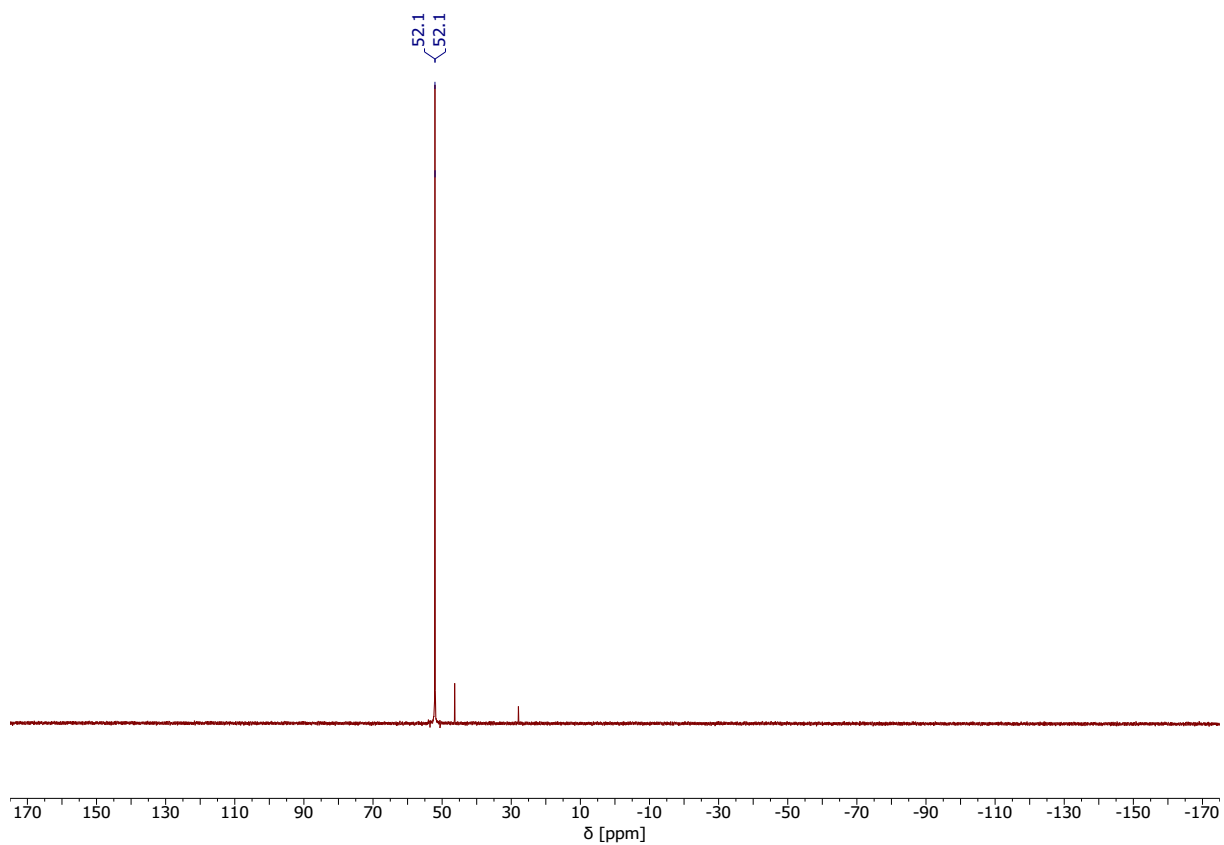

$^1\text{H}$  NMR (400 MHz,  $\text{CD}_2\text{Cl}_2$ ) spectrum of **MACHO**<sup>p(iPr)</sup>.

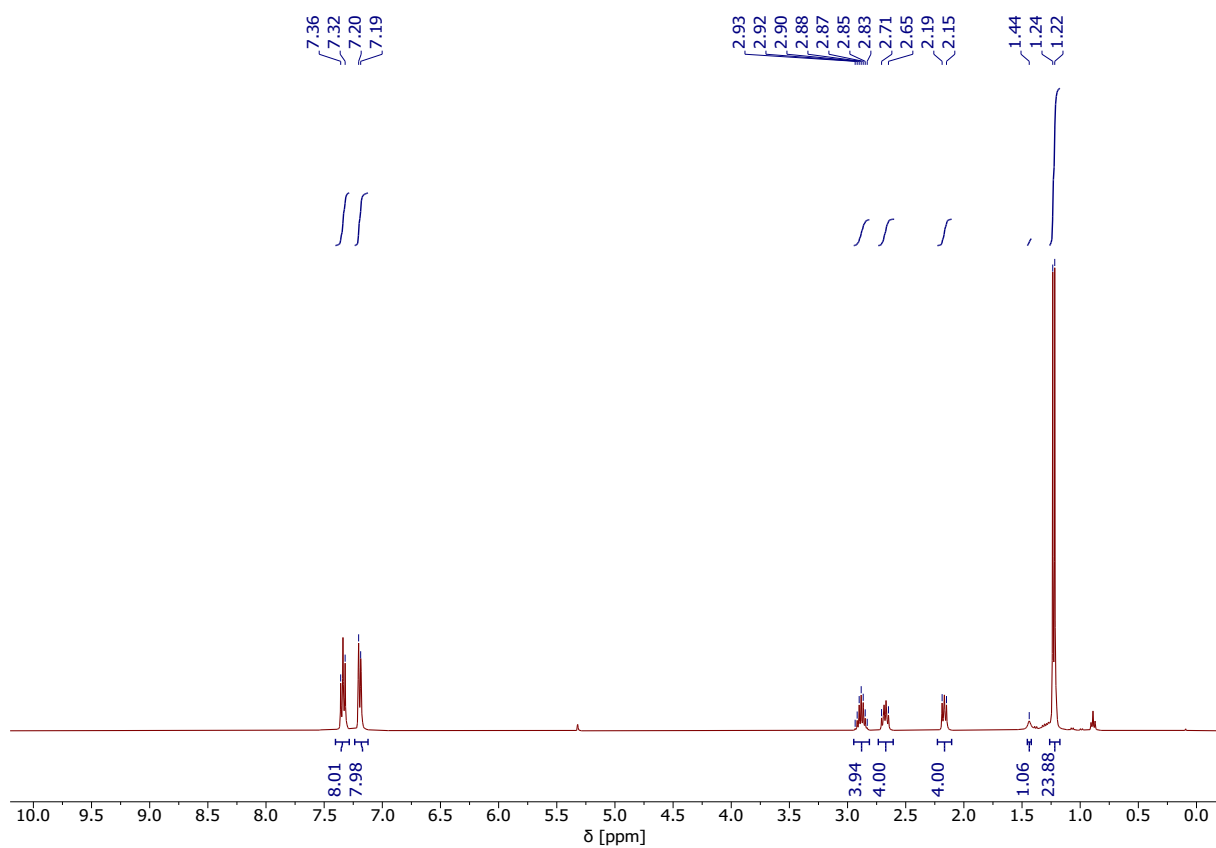

$^{13}\text{C}$  NMR (101 MHz,  $\text{CD}_2\text{Cl}_2$ ) spectrum of **MACHO**<sup>p(iPr)</sup>.

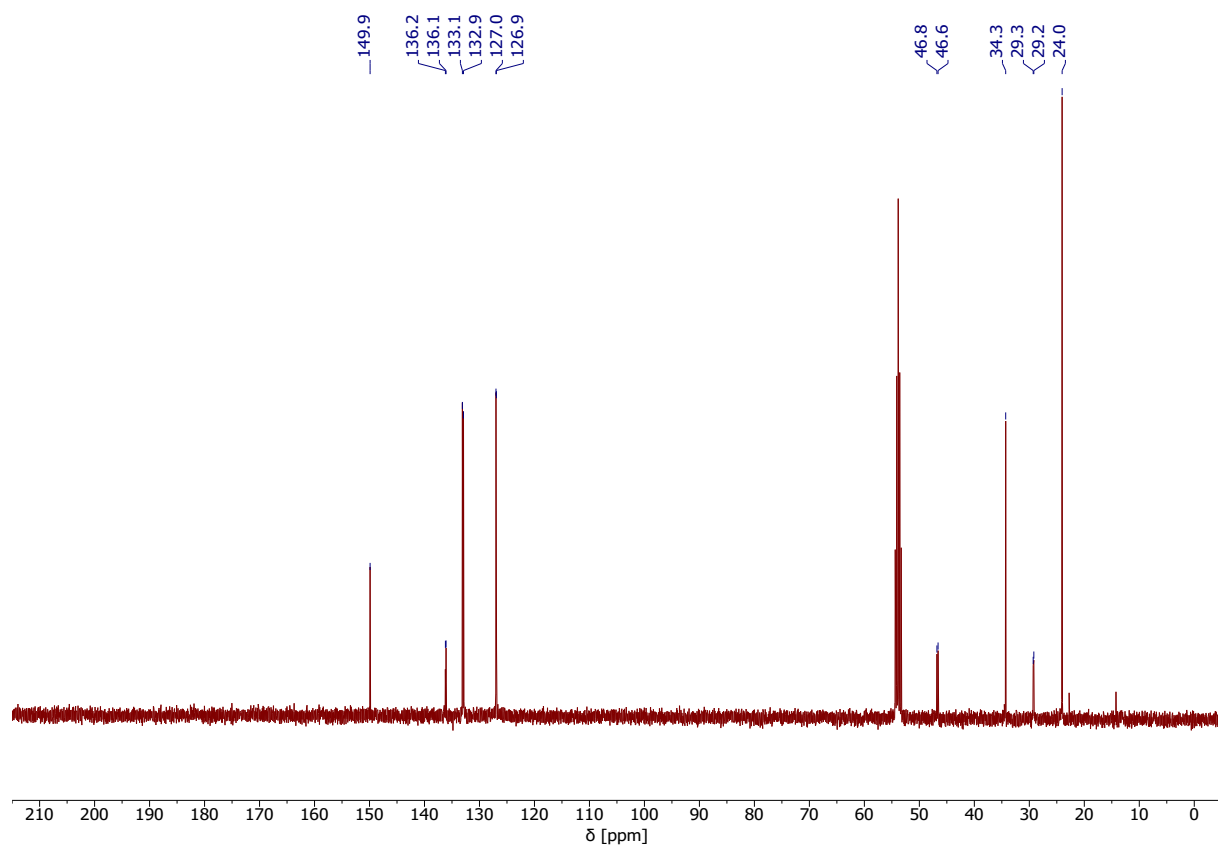

$^{31}\text{P}$  NMR (162 MHz  $\text{CD}_2\text{Cl}_2$ ) spectrum of **MACHO<sup>p(iPr)</sup>**.

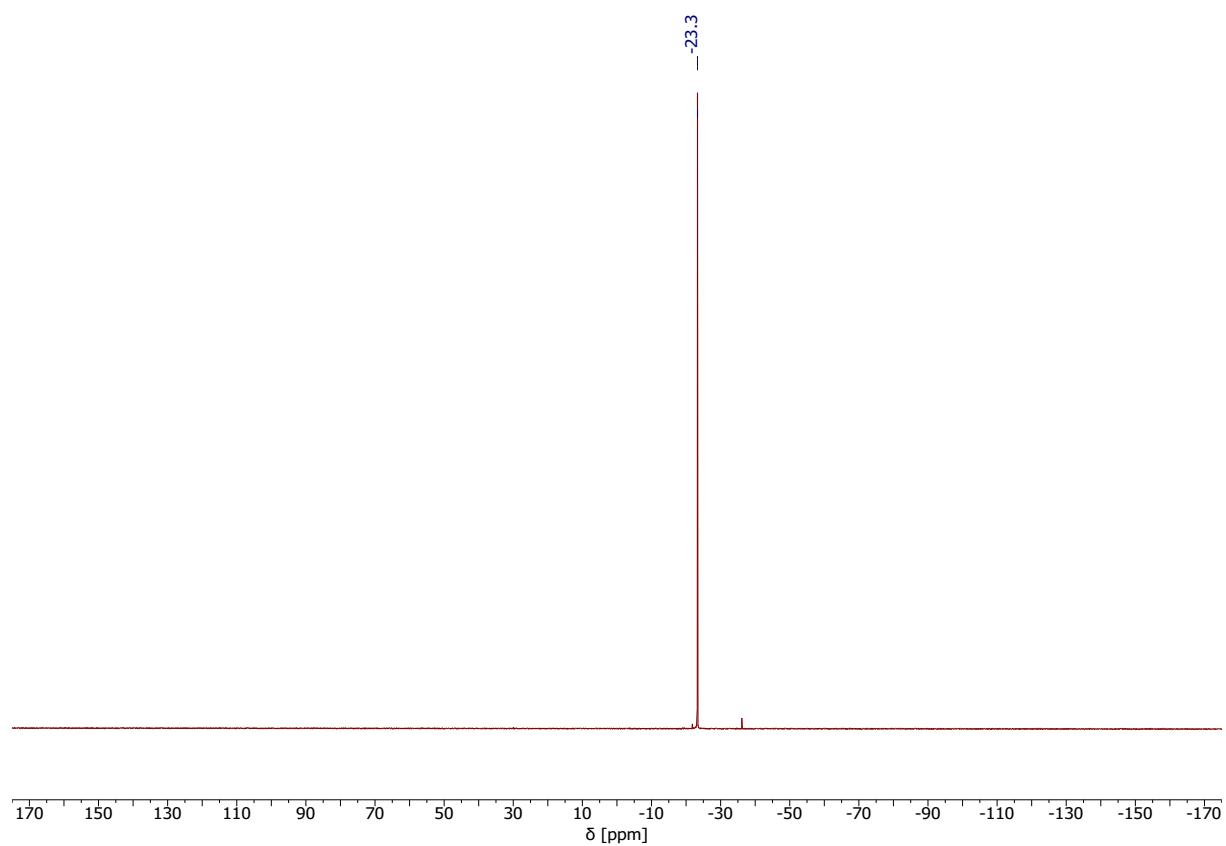

$^1\text{H}$  NMR (400 MHz,  $\text{CD}_2\text{Cl}_2$ ) spectrum of **Ru-MACHO<sup>p(iPr)</sup>**.

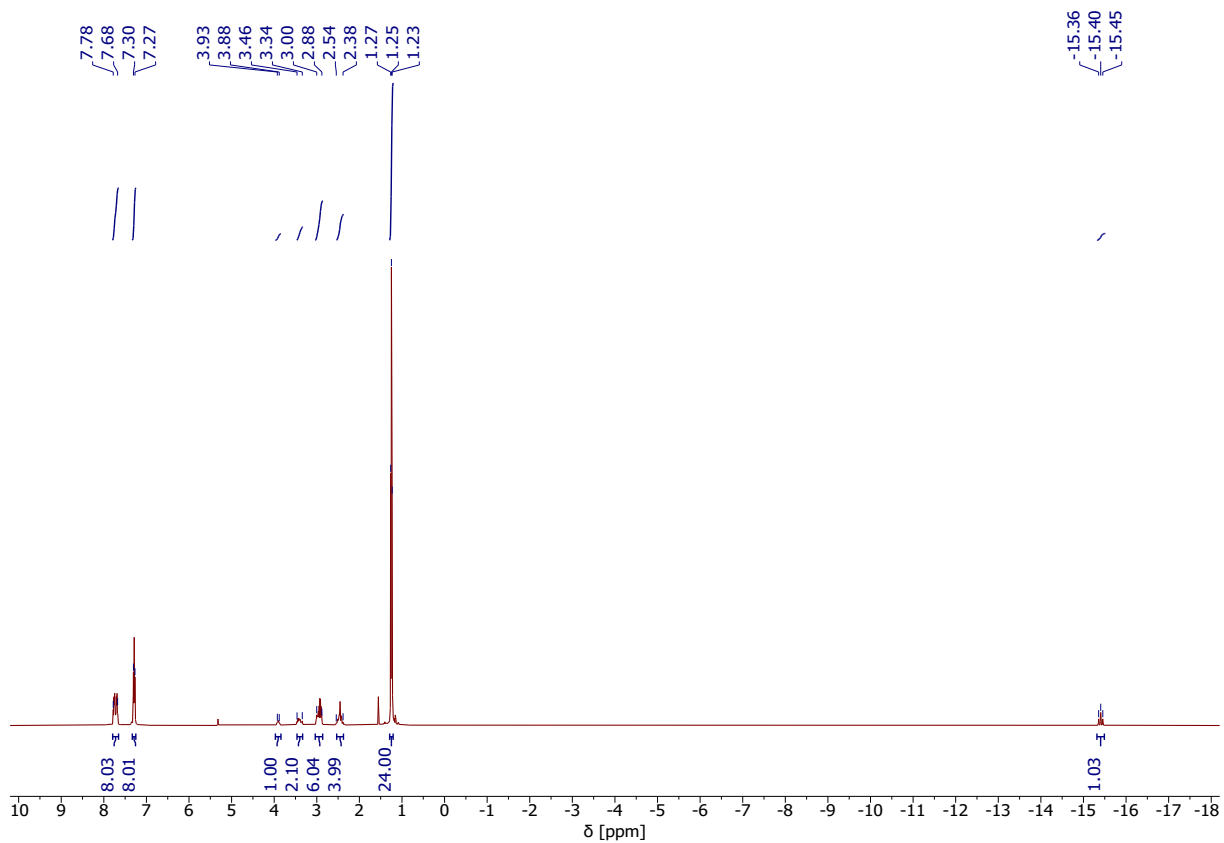

$^{13}\text{C}$  NMR (101 MHz,  $\text{CD}_2\text{Cl}_2$ ) spectrum of  $\text{Ru-MACHO}^p(i\text{Pr})$ .

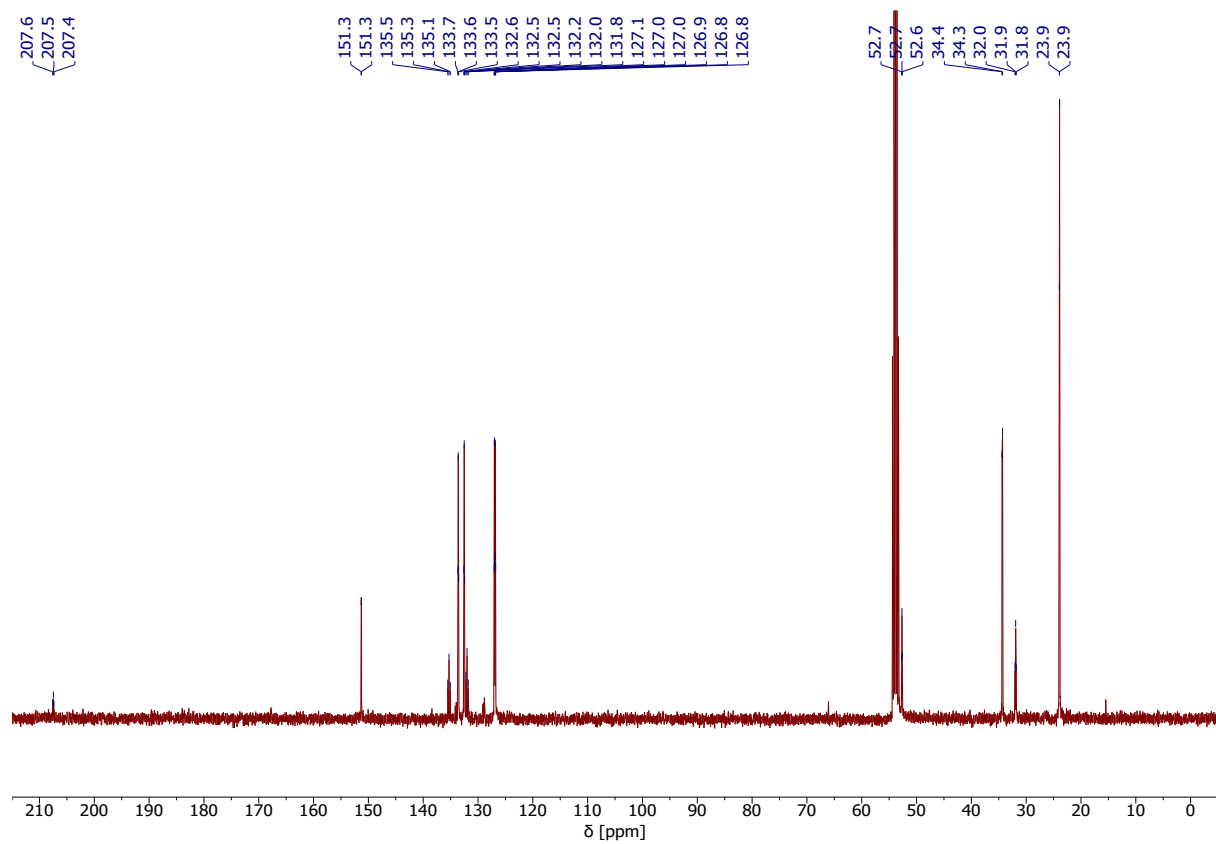

$^{31}\text{P}$  NMR (162 MHz,  $\text{CD}_2\text{Cl}_2$ ) spectrum of  $\text{Ru-MACHO}^p(i\text{Pr})$ .

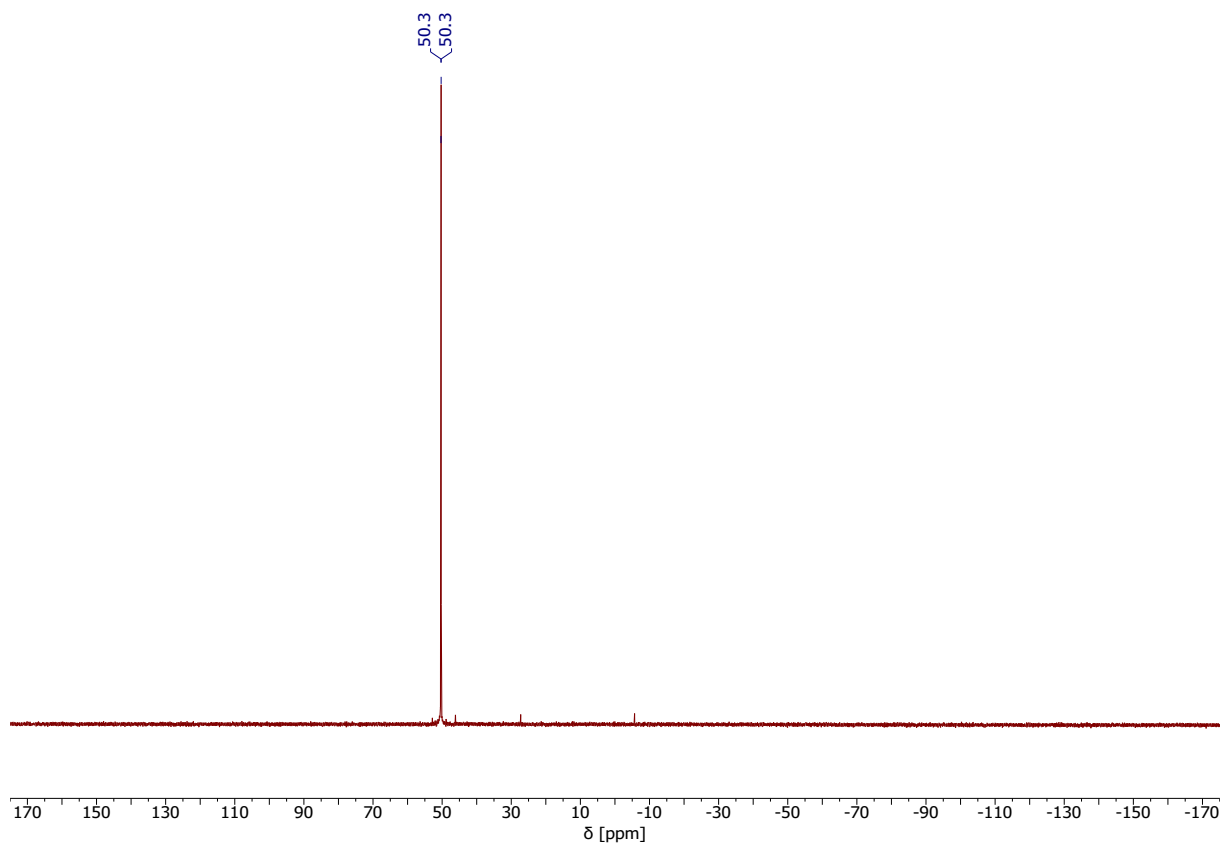

$^1\text{H}$  NMR (400 MHz,  $\text{CD}_2\text{Cl}_2$ ) spectrum of **MACHO**<sup>p(3-Pe)</sup>.

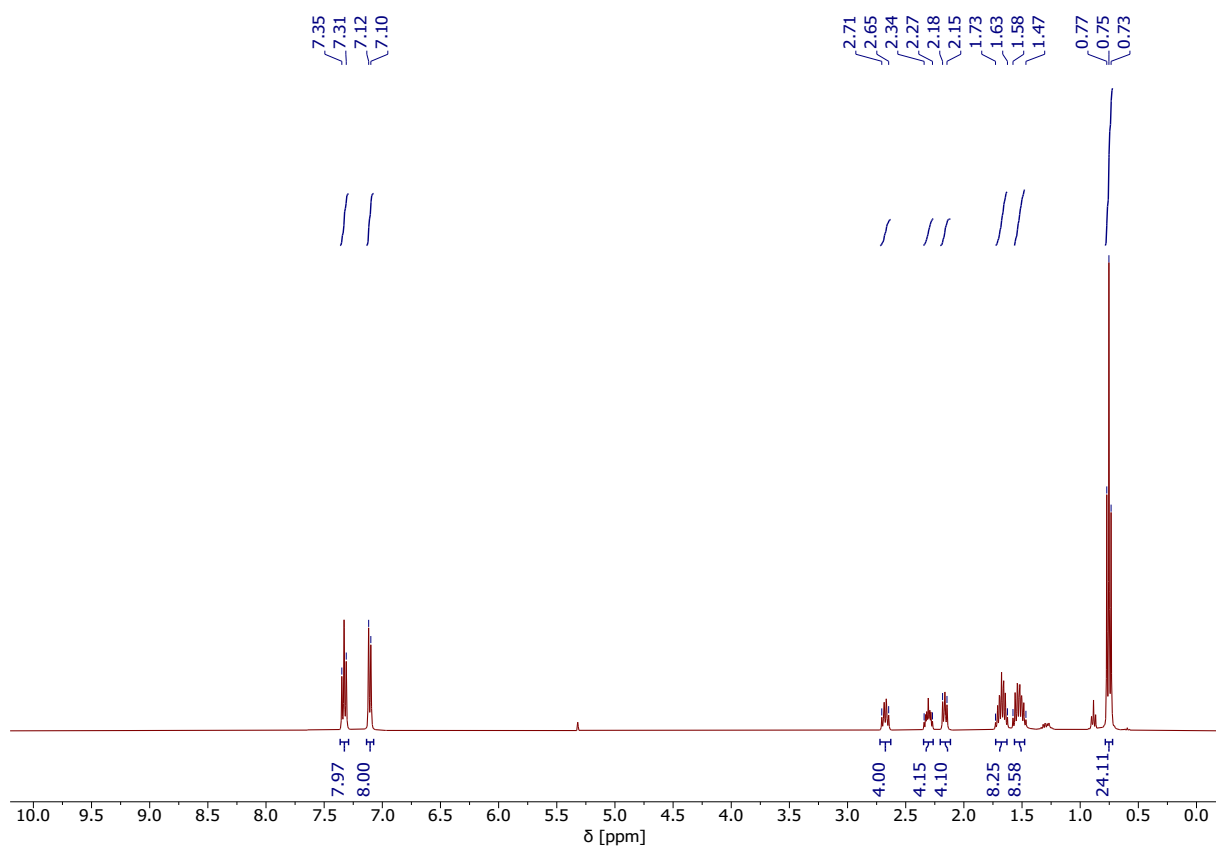

$^{13}\text{C}$  NMR (101 MHz,  $\text{CD}_2\text{Cl}_2$ ) spectrum of **MACHO**<sup>p(3-Pe)</sup>.

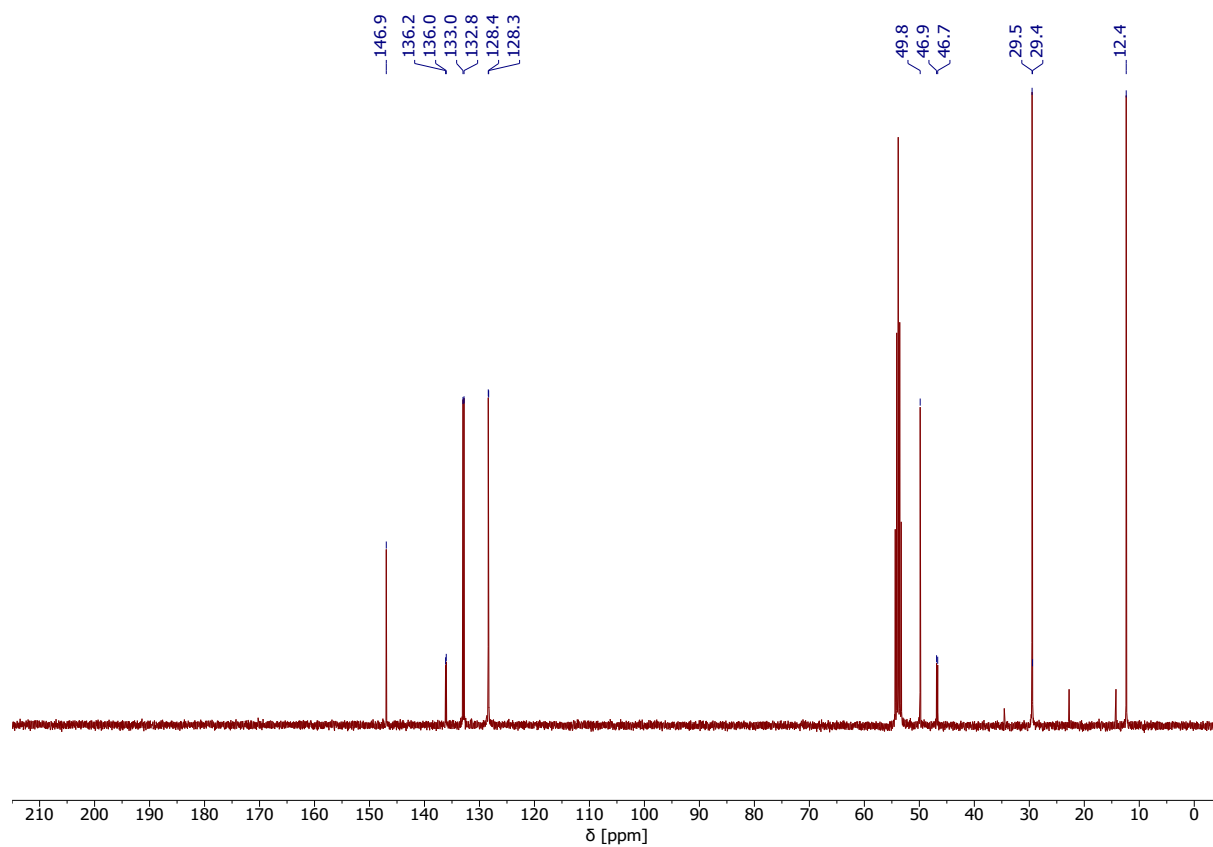

$^{31}\text{P}$  NMR (162 MHz,  $\text{CD}_2\text{Cl}_2$ ) spectrum of **MACHO**<sup>p(3-Pe)</sup>.

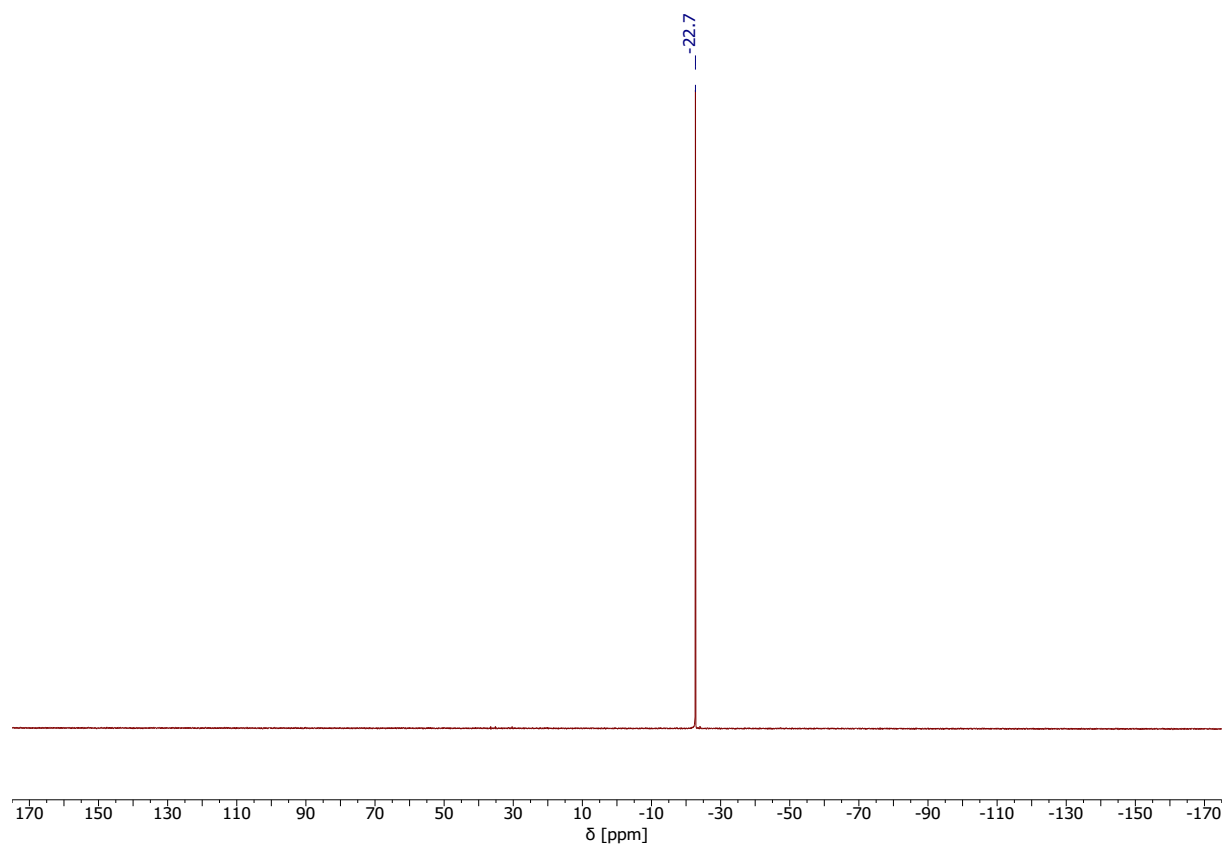

$^1\text{H}$  NMR (400 MHz,  $\text{CD}_2\text{Cl}_2$ ) spectrum of **Ru-MACHO**<sup>p(3-Pe)</sup>.

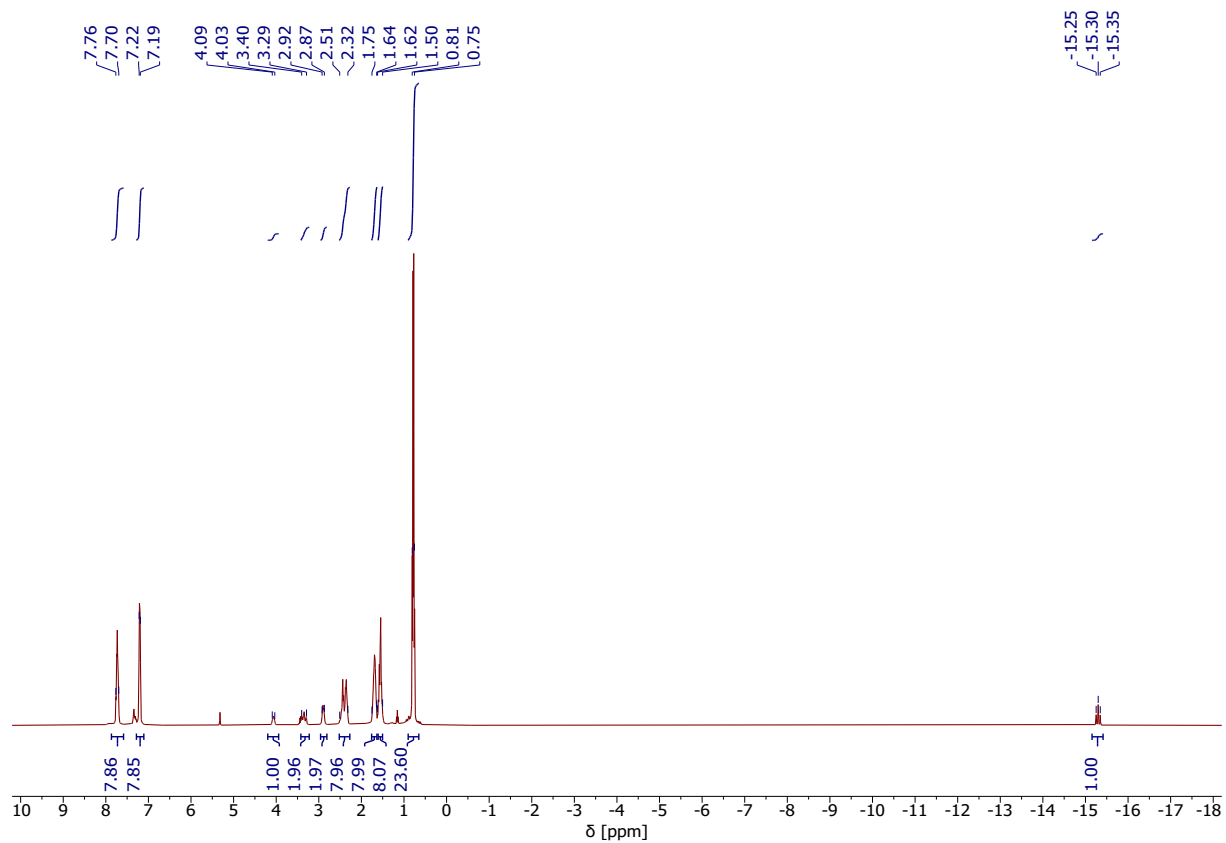

$^{13}\text{C}$  NMR (101 MHz,  $\text{CD}_2\text{Cl}_2$ ) spectrum of **Ru-MACHO<sup>p</sup>(3-Pe)**.

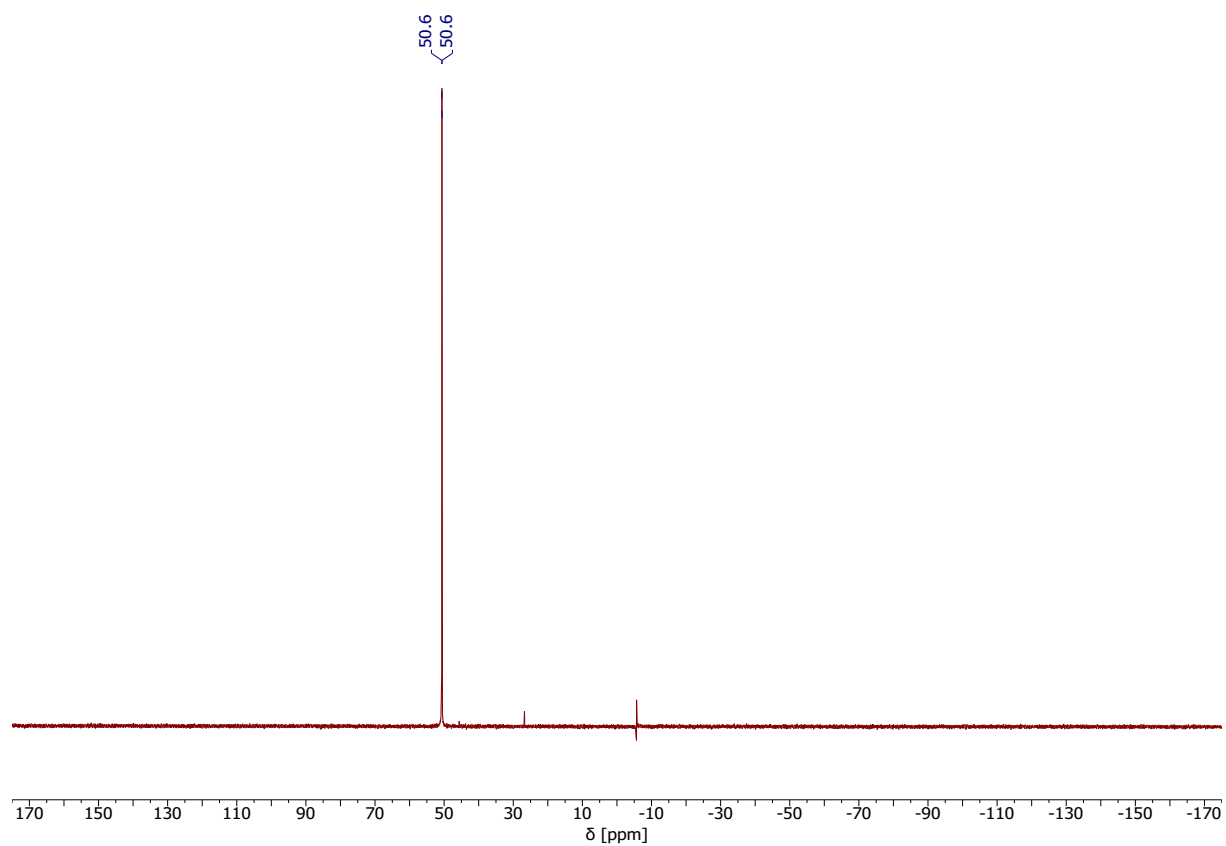

$^{31}\text{P}$  NMR (162 MHz,  $\text{CD}_2\text{Cl}_2$ ) spectrum of **Ru-MACHO<sup>p</sup>(3-Pe)**.

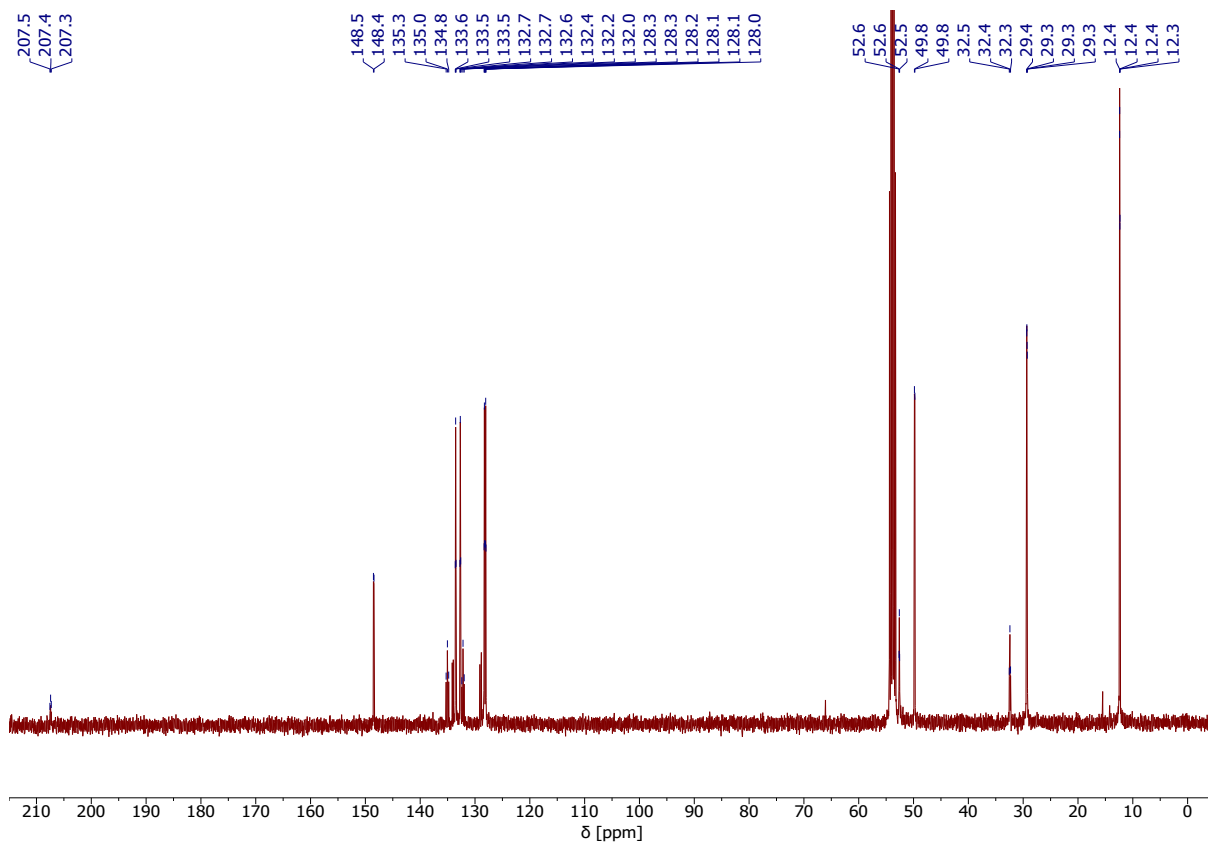

$^1\text{H}$  NMR (400 MHz,  $\text{CDCl}_3$ ) spectrum of **MACHO**<sup>Naph</sup>.

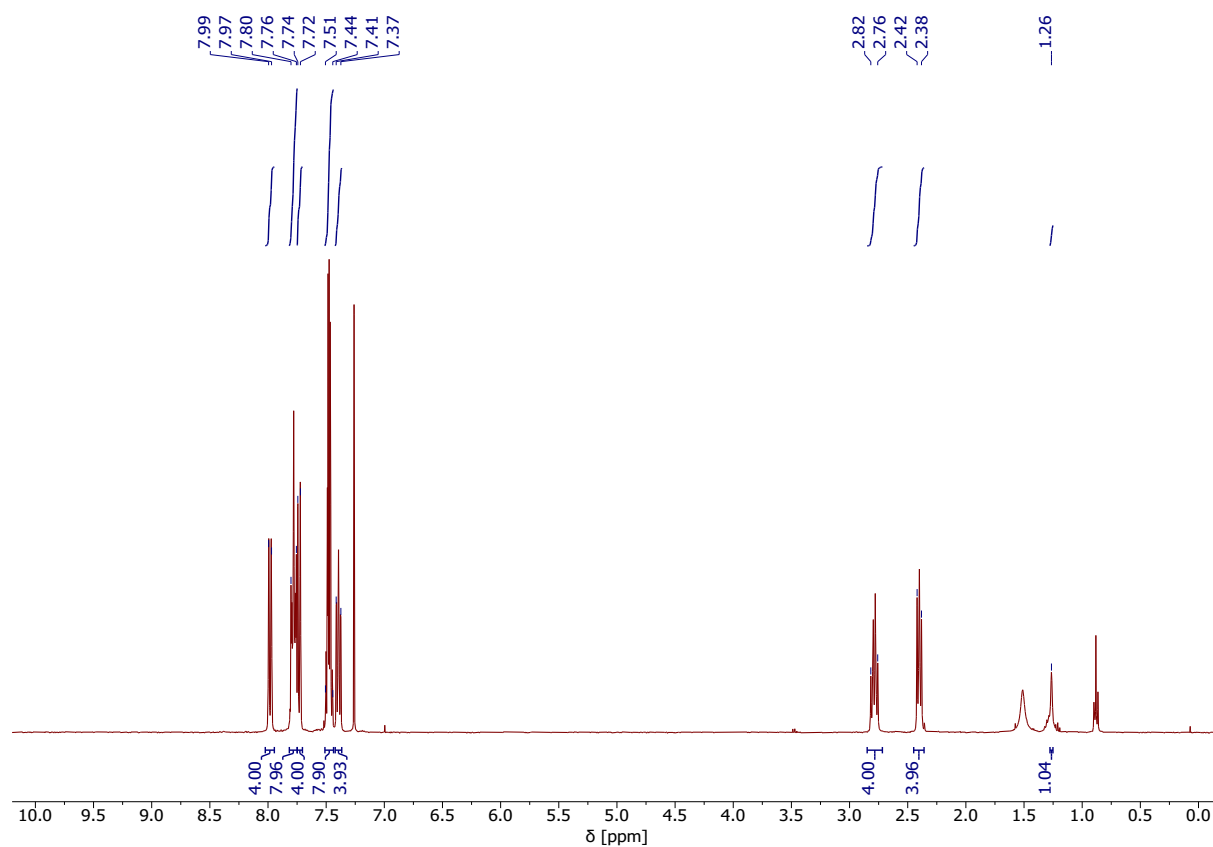

$^{13}\text{C}$  NMR (101 MHz,  $\text{CDCl}_3$ ) spectrum of **MACHO**<sup>Naph</sup>.

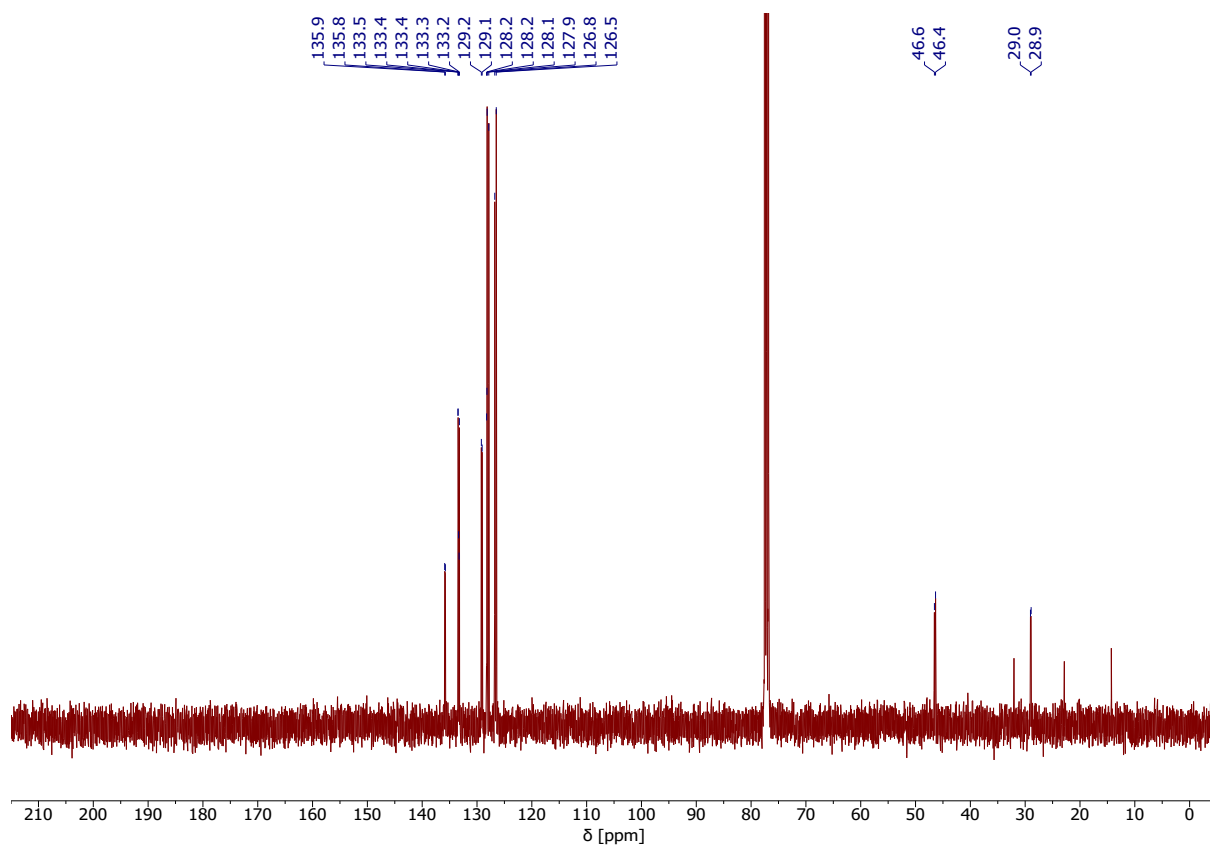

$^{31}\text{P}$  NMR (162 MHz,  $\text{CDCl}_3$ ) spectrum of **MACHO<sup>Naph</sup>**.

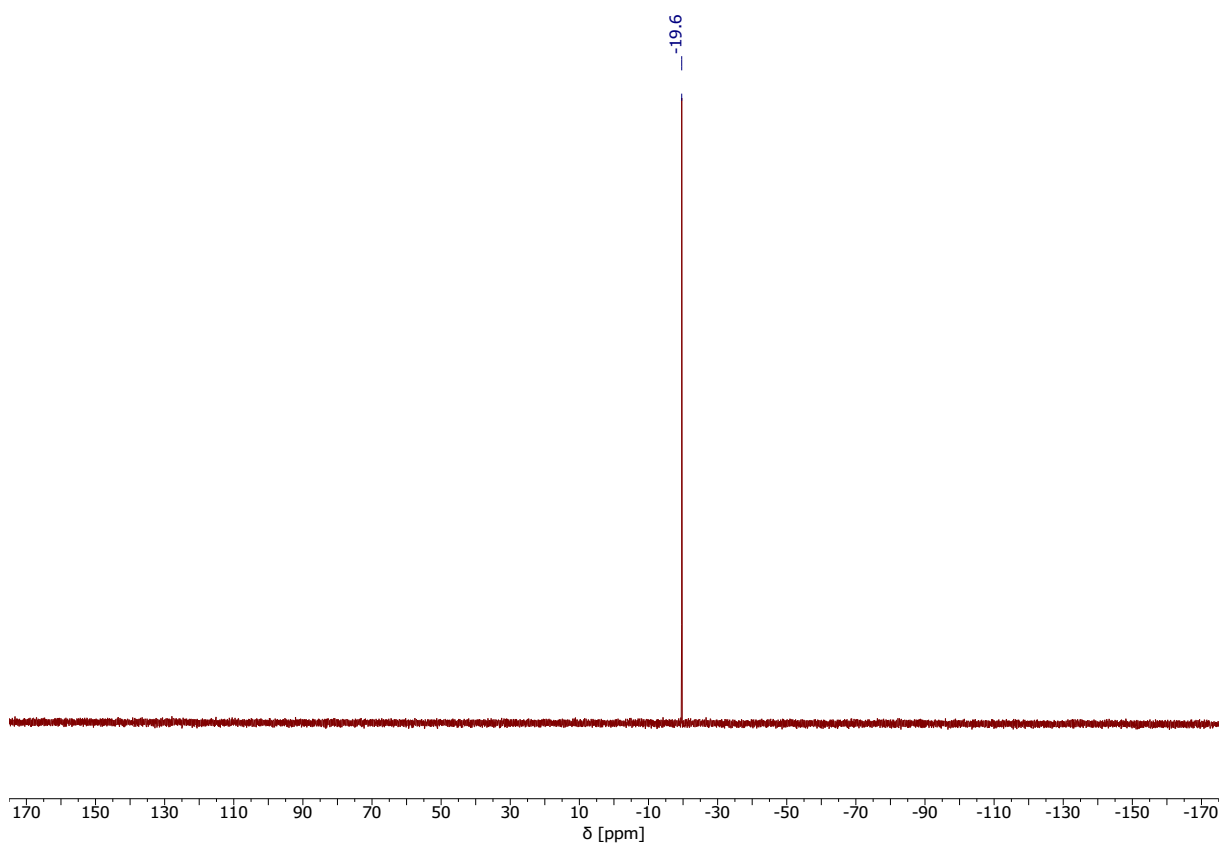

$^1\text{H}$  NMR (400 MHz,  $\text{CD}_2\text{Cl}_2$ ) spectrum of **Ru-MACHO<sup>Naph</sup>**.

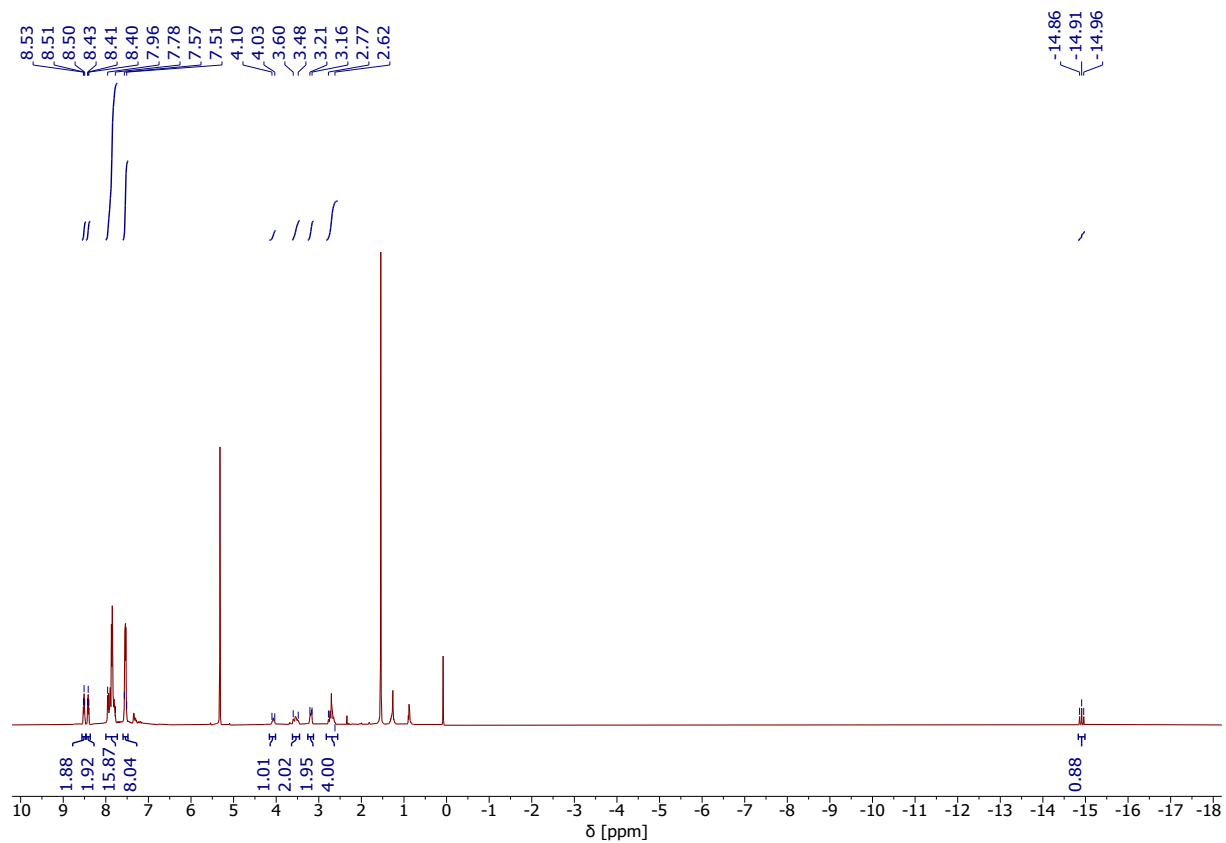

<sup>31</sup>P NMR (162 MHz, CD<sub>2</sub>Cl<sub>2</sub>) spectrum of Ru-MACHO<sup>Naph</sup>.

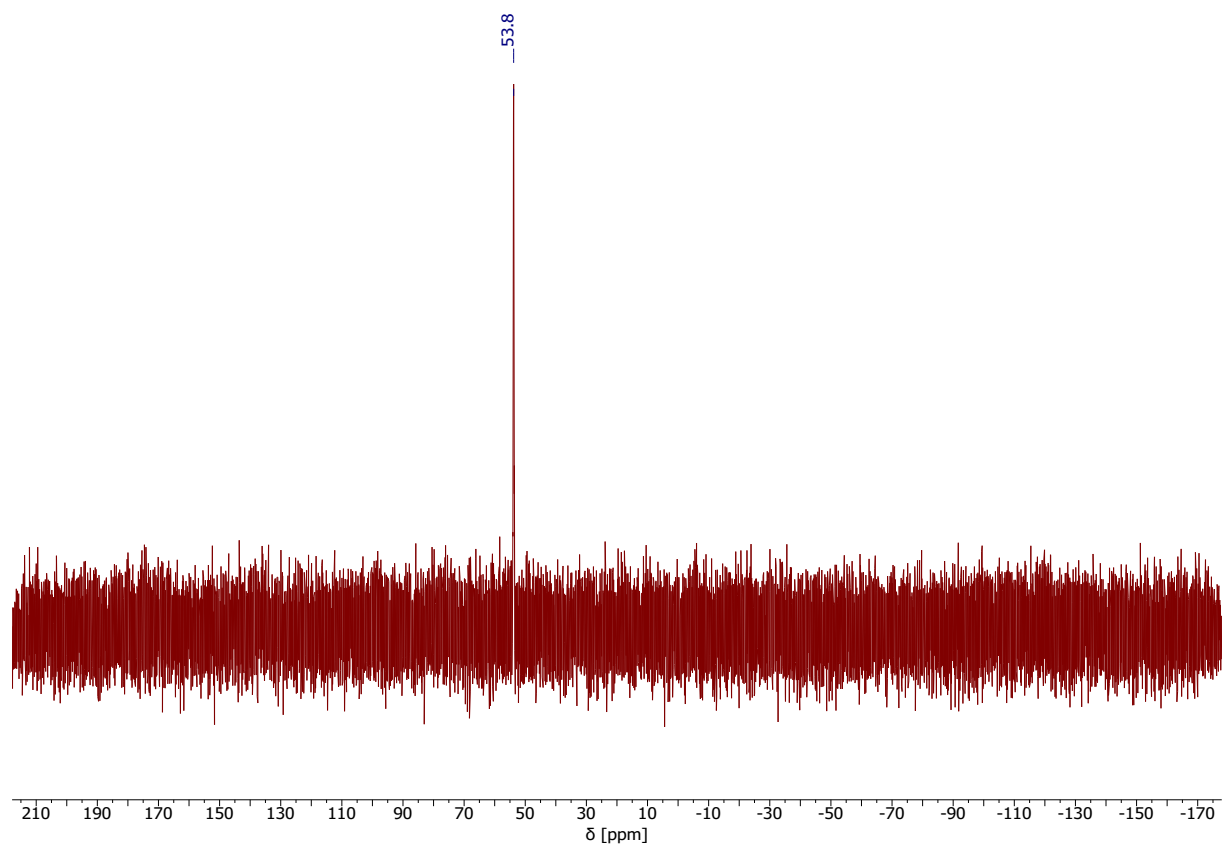

<sup>1</sup>H NMR (400 MHz, CDCl<sub>3</sub>) spectrum of MACHO<sup>Biph</sup>.

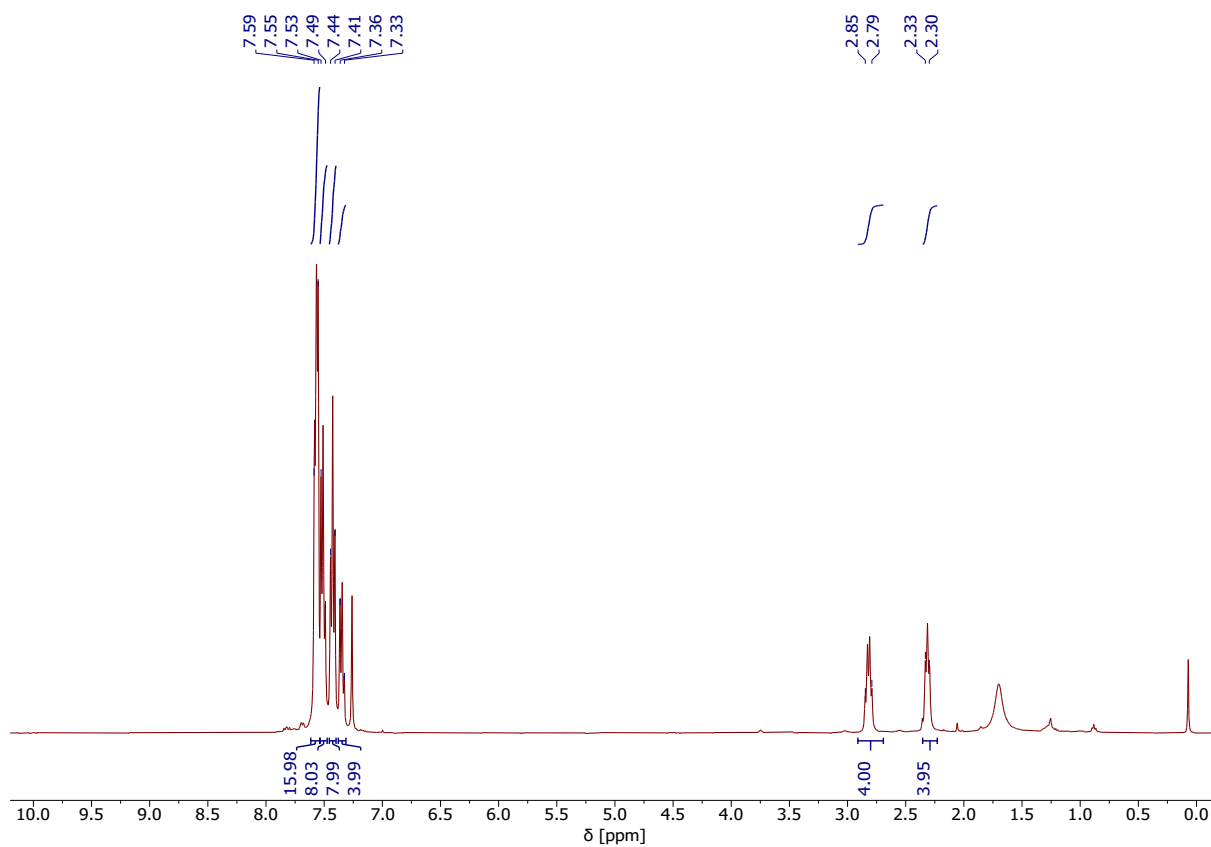

$^{13}\text{C}$  NMR (101 MHz,  $\text{CDCl}_3$ ) spectrum of **MACHO<sup>Biph</sup>**.

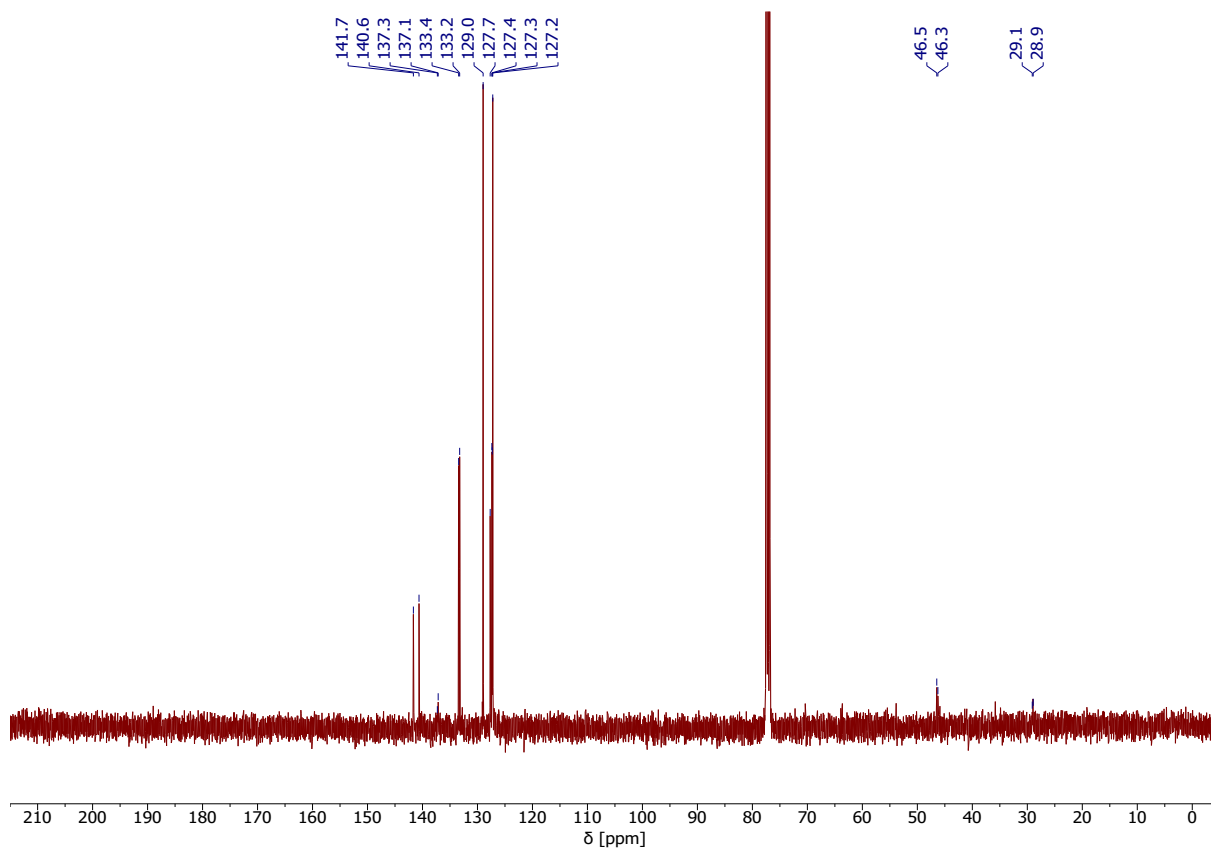

$^{31}\text{P}$  NMR (162 MHz,  $\text{CDCl}_3$ ) spectrum of **MACHO<sup>Biph</sup>**.

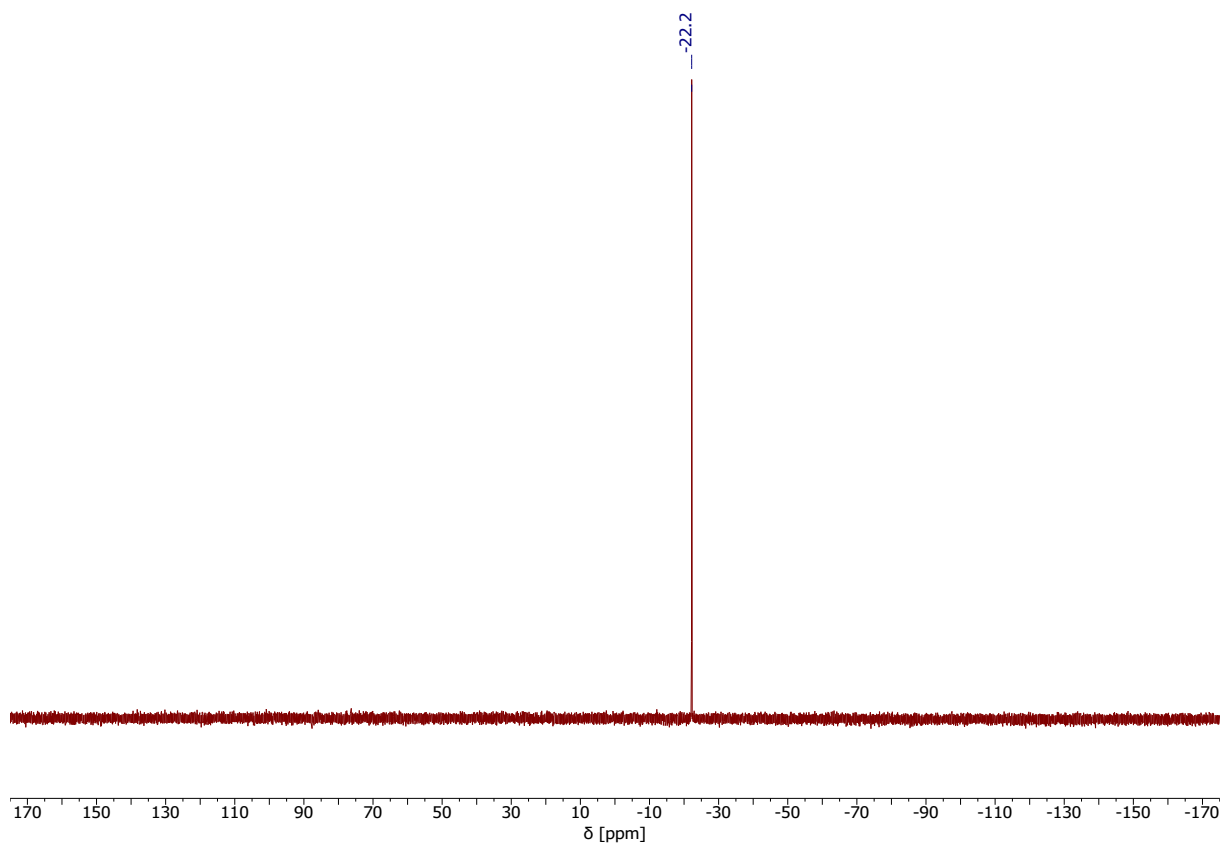

$^1\text{H}$  NMR (400 MHz,  $\text{CDCl}_3$ ) spectrum of **Ru-MACHO<sup>Biph</sup>**.

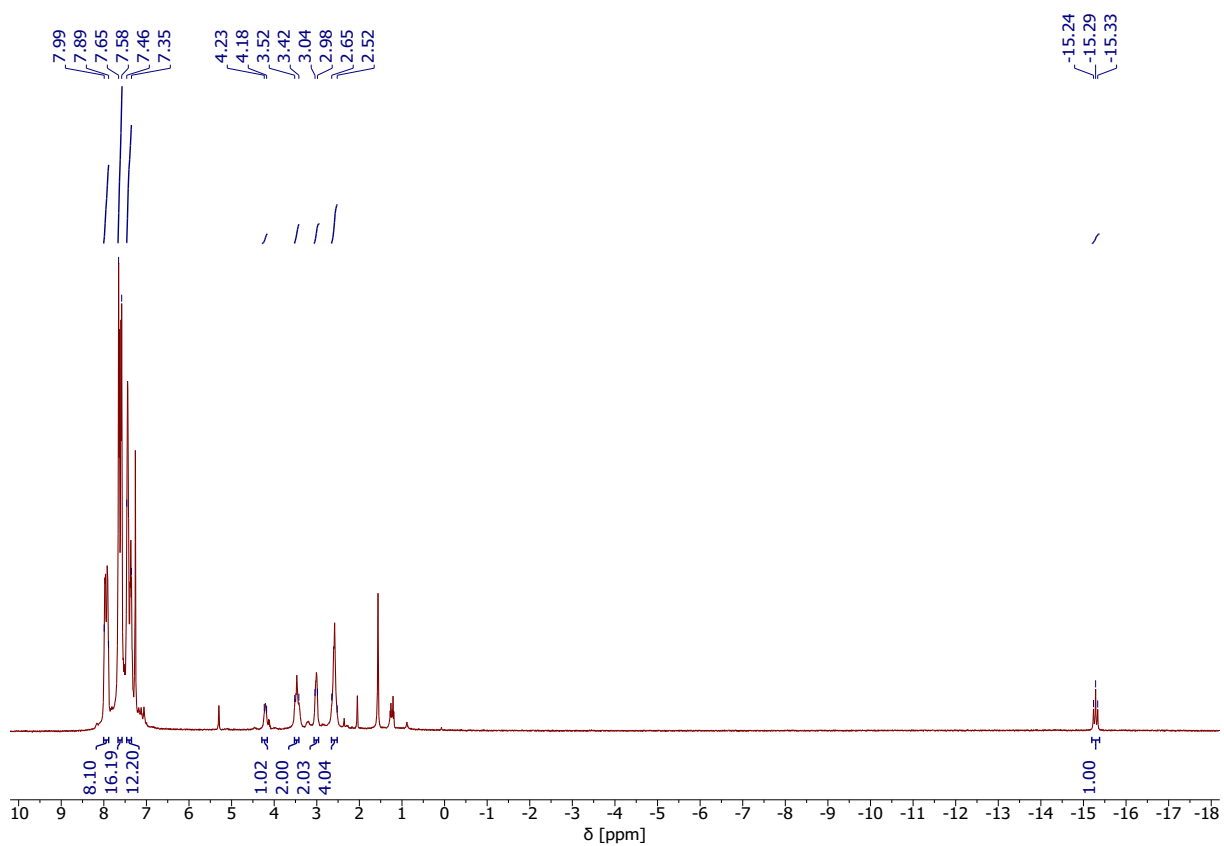

$^{13}\text{C}$  NMR (101 MHz,  $\text{CDCl}_3$ ) spectrum of **Ru-MACHO<sup>Biph</sup>**.

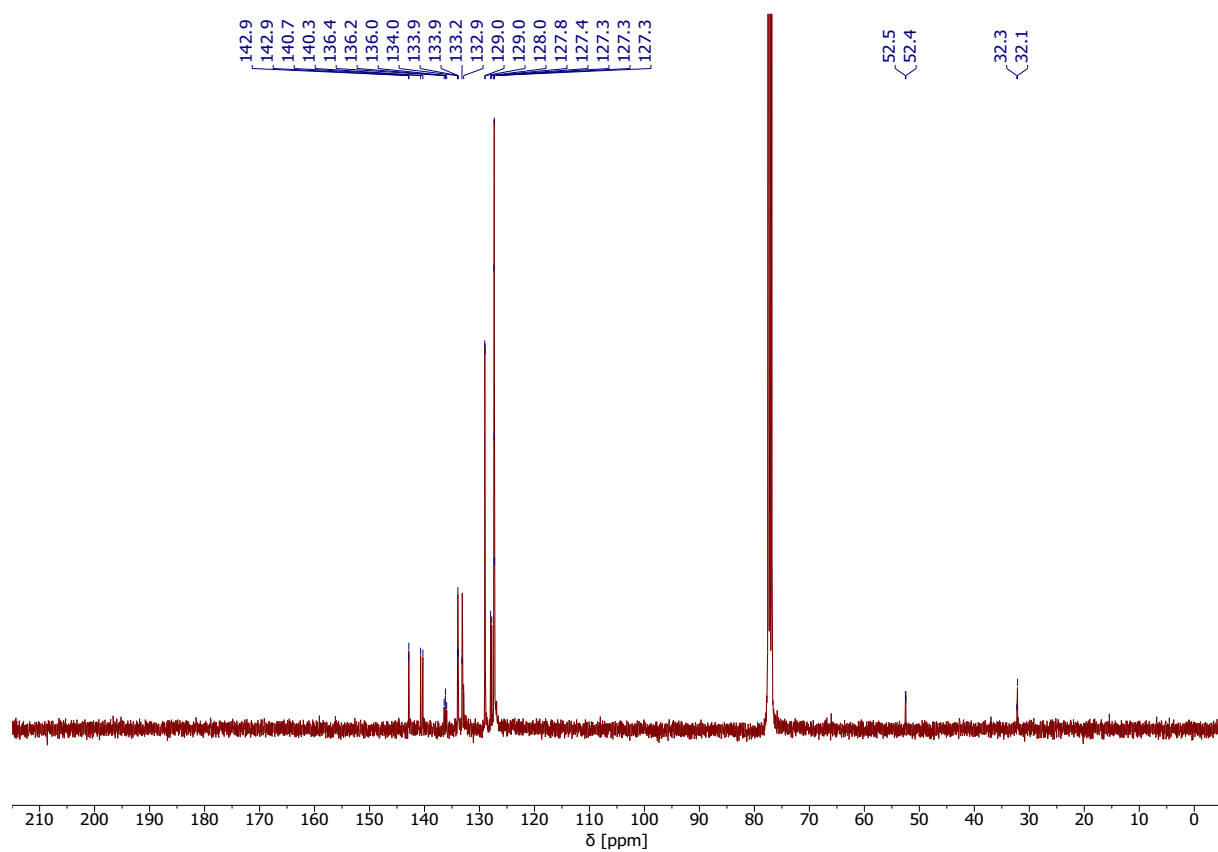

$^{31}\text{P}$  NMR (162 MHz,  $\text{CDCl}_3$ ) spectrum of  $\text{Ru-MACHO}^{\text{Biph}}$ .

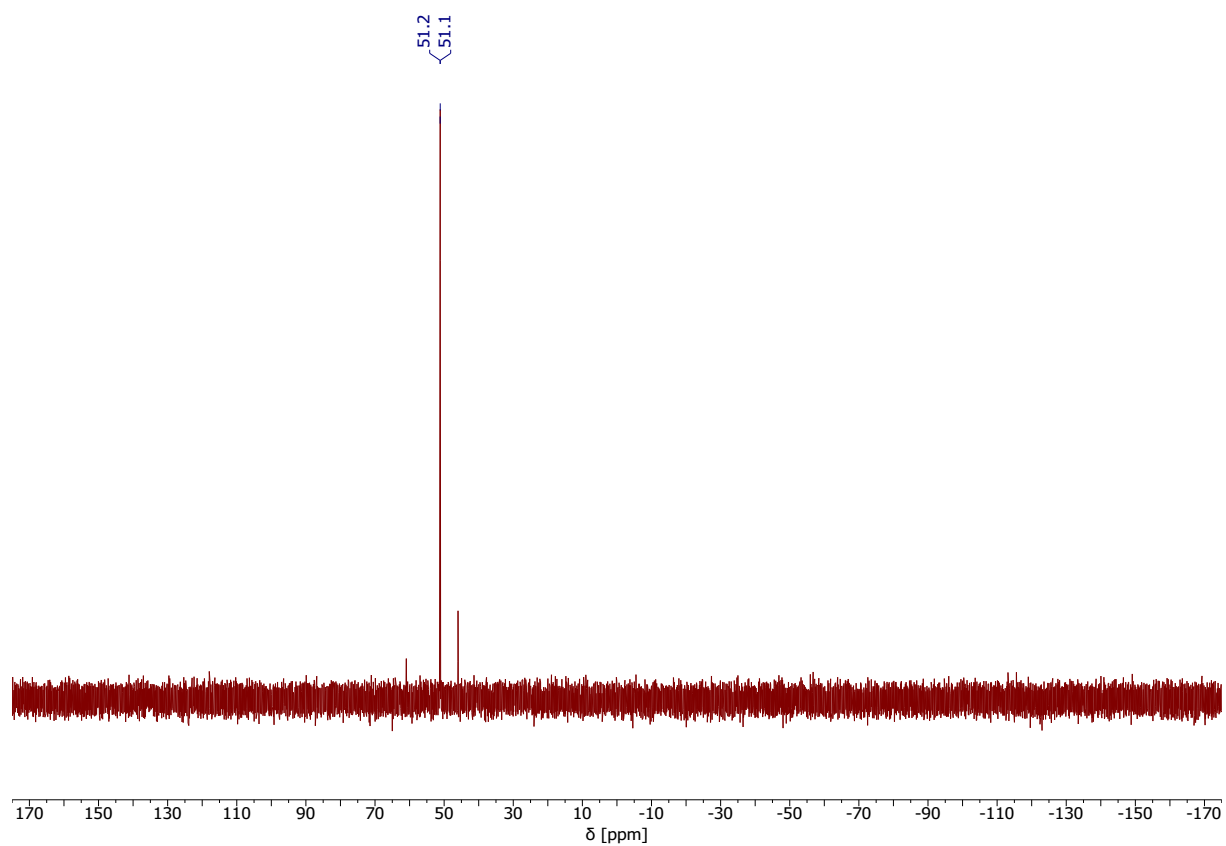

$^1\text{H}$  NMR (400 MHz,  $\text{CDCl}_3$ ) spectrum of  $\text{MACHO}^{\text{CF}_3}$ .

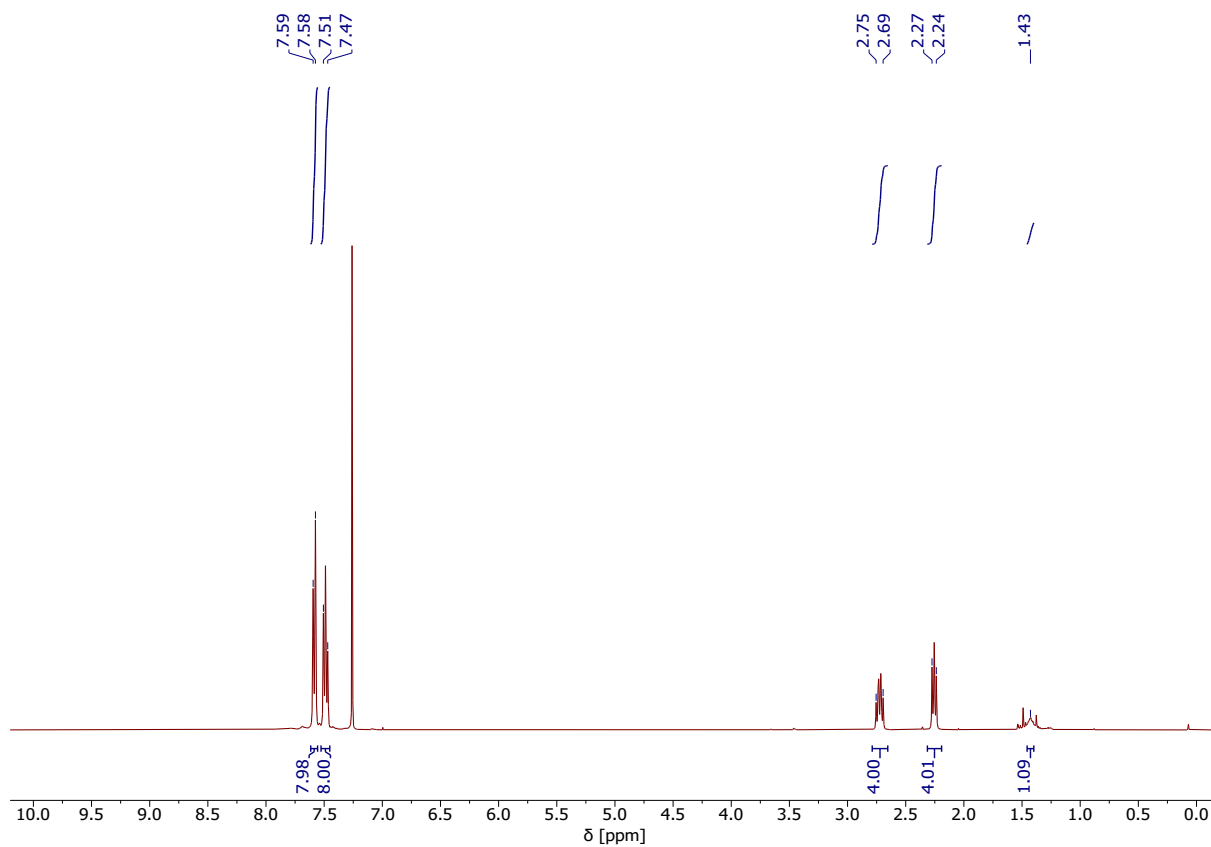

$^{13}\text{C}$  NMR (101 MHz,  $\text{CDCl}_3$ ) spectrum of **MACHO<sup>p</sup>(CF<sub>3</sub>)**.

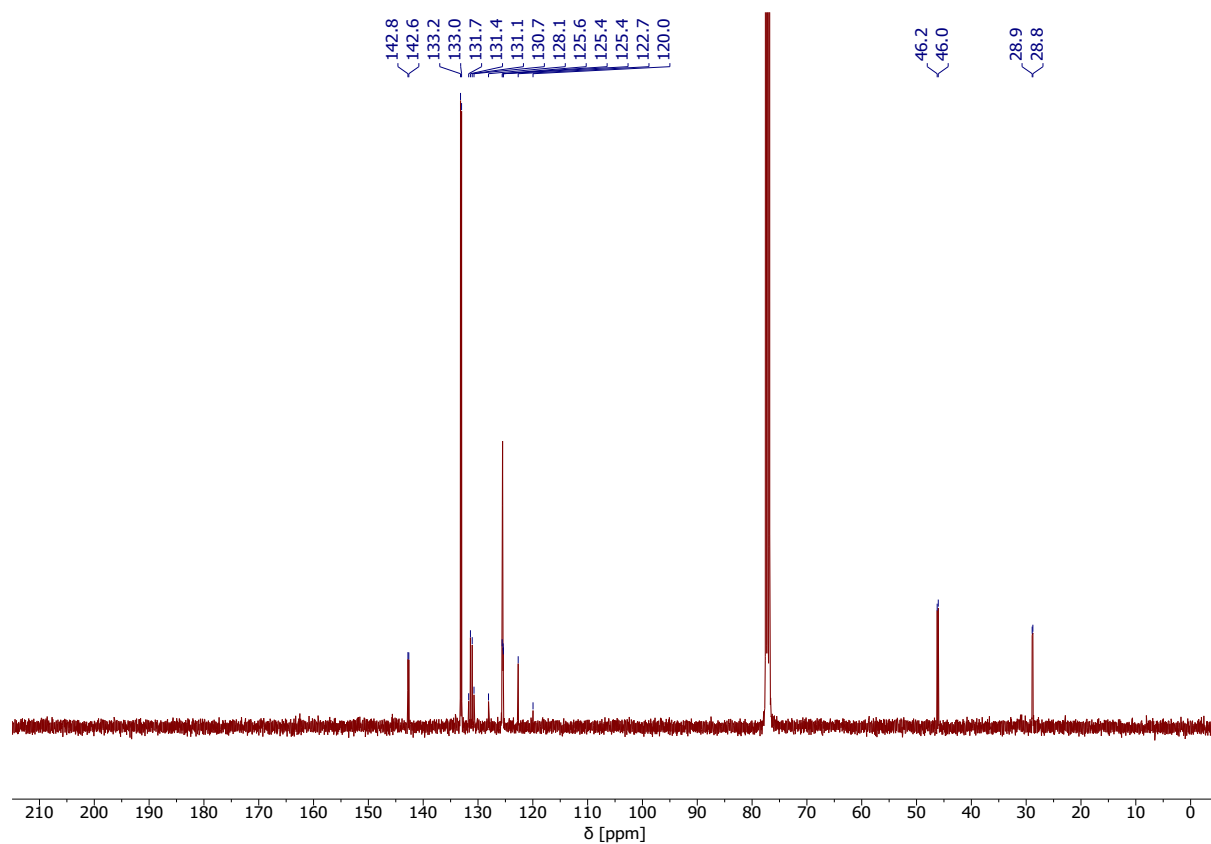

$^{19}\text{F}$  NMR (176 MHz,  $\text{CDCl}_3$ ) spectrum of **MACHO<sup>p</sup>(CF<sub>3</sub>)**.

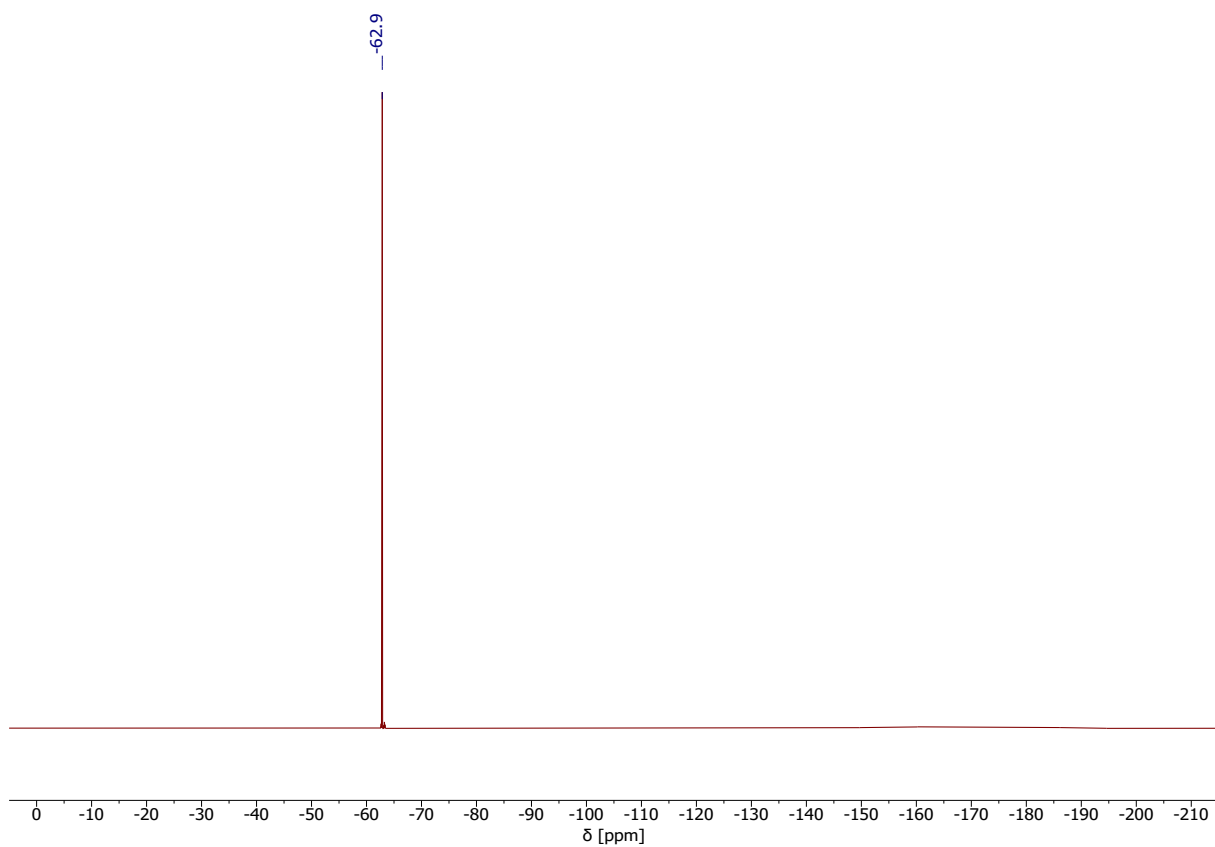

$^{31}\text{P}$  NMR (162 MHz,  $\text{CDCl}_3$ ) spectrum of **MACHO**<sup>p(CF<sub>3</sub>)</sup>.

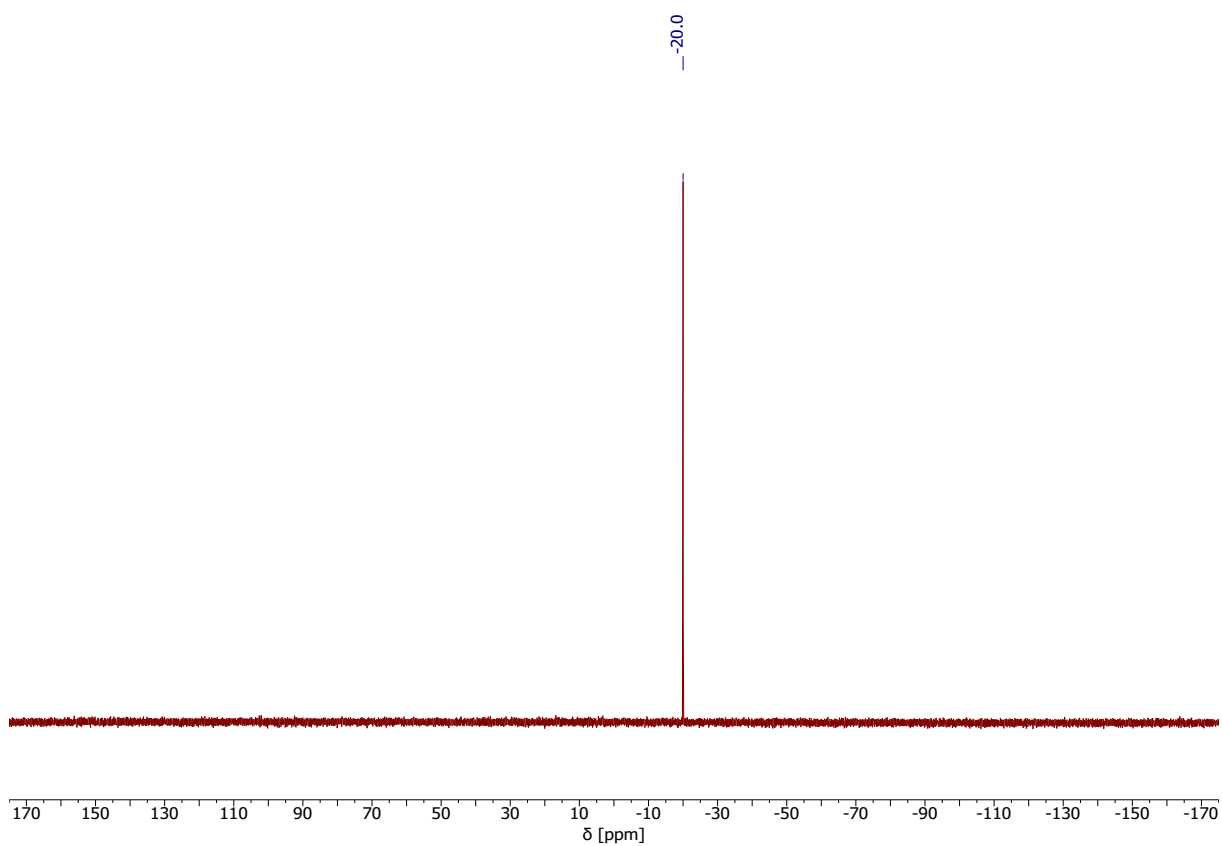

$^1\text{H}$  NMR (400 MHz,  $\text{C}_6\text{D}_6$ ) spectrum of **Ru-MACHO**<sup>p(CF<sub>3</sub>)</sup>.

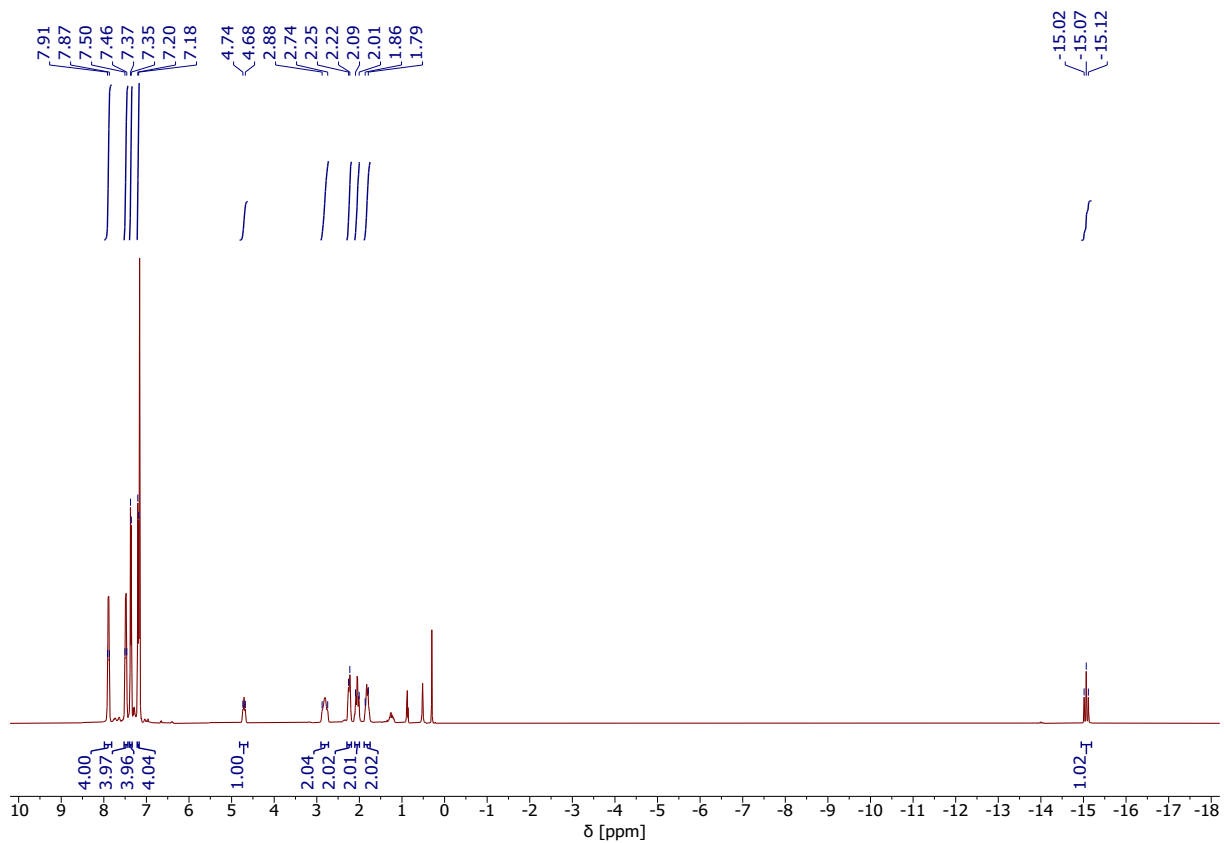

$^{13}\text{C}$  NMR (101 MHz,  $\text{C}_6\text{D}_6$ ) spectrum of **Ru-MACHO**<sup>p</sup>(CF<sub>3</sub>).

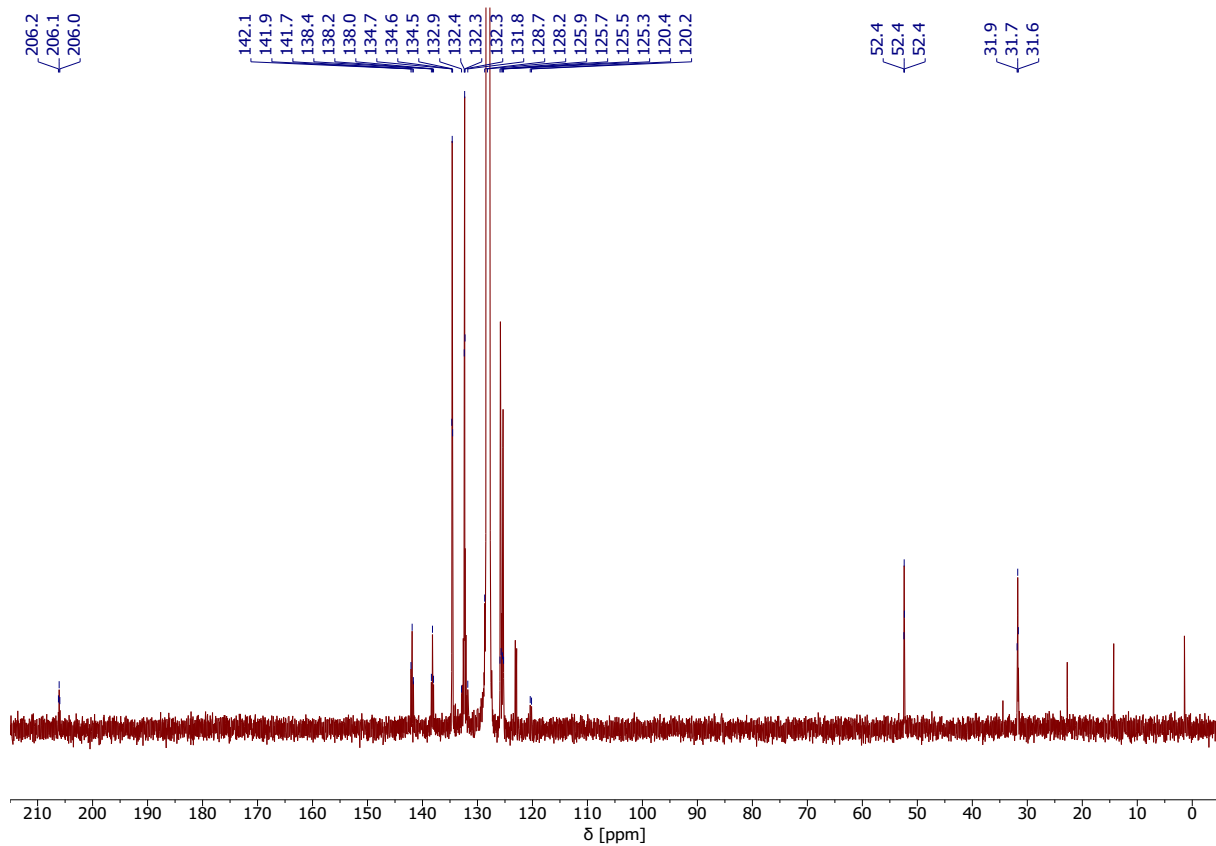

$^{19}\text{F}$  NMR (176 MHz,  $\text{C}_6\text{D}_6$ ) spectrum of **Ru-MACHO**<sup>p</sup>(CF<sub>3</sub>).

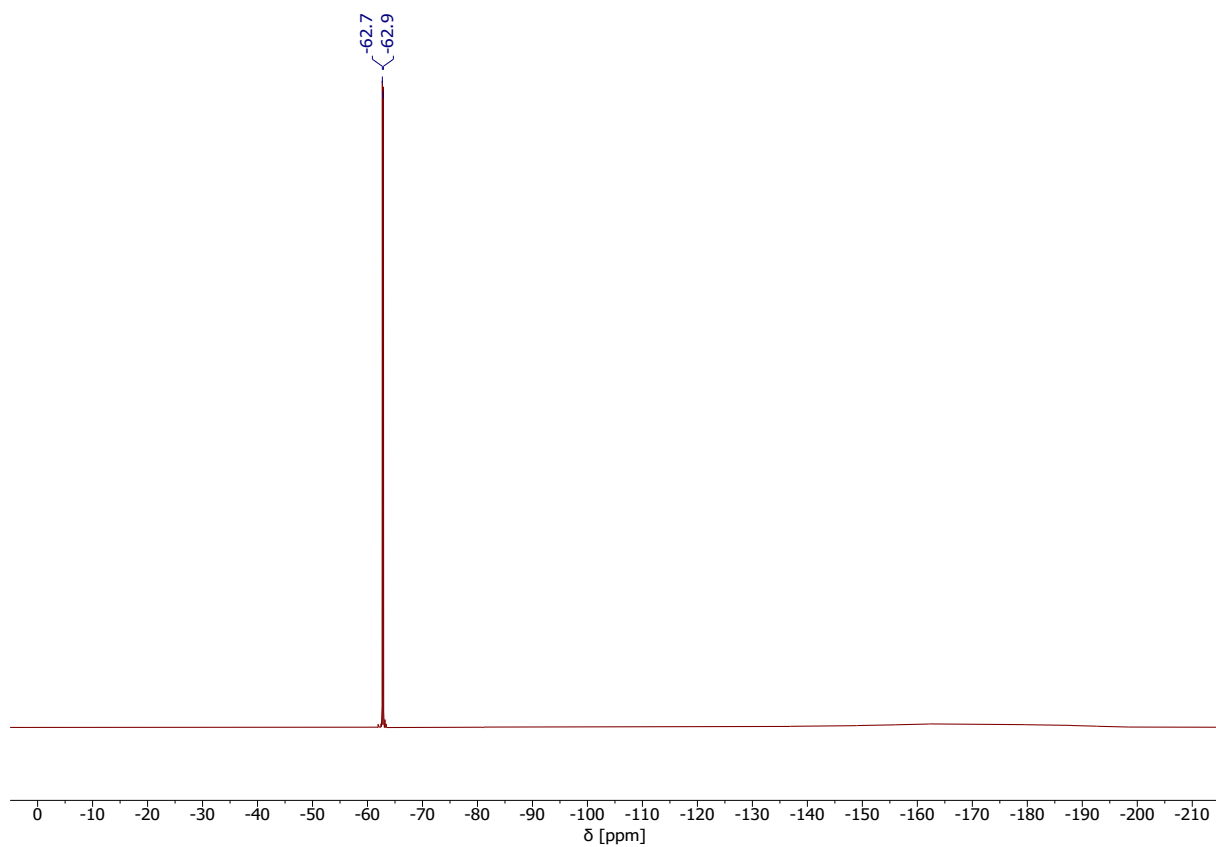

$^{31}\text{P}$  NMR (162 MHz,  $\text{C}_6\text{D}_6$ ) spectrum of **Ru-MACHO**<sup>p(CF<sub>3</sub>)</sup>.

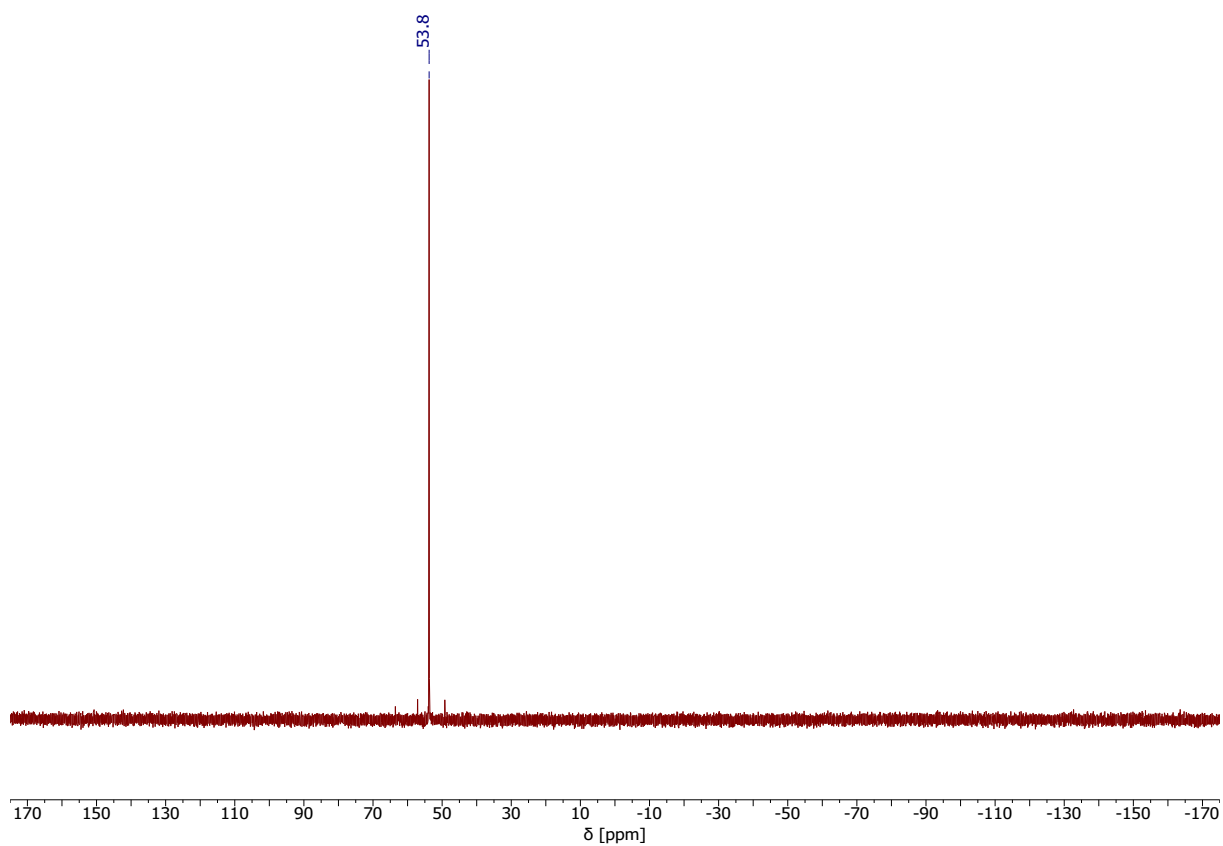

$^1\text{H}$  NMR (400 MHz,  $\text{CDCl}_3$ ) spectrum of **MACHO**<sup>p(OMe)</sup>.

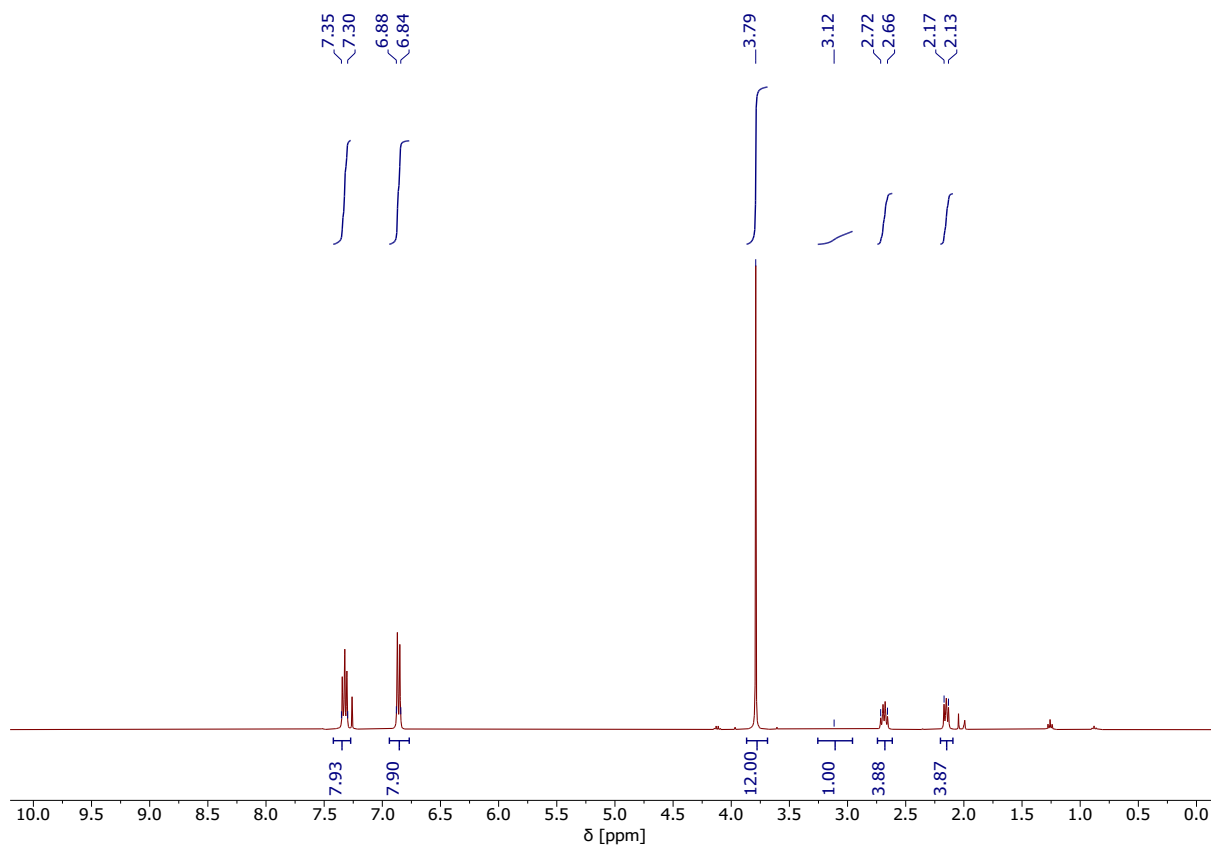

$^{13}\text{C}$  NMR (101 MHz,  $\text{CDCl}_3$ ) spectrum of **MACHO**<sup>p</sup>(OMe).

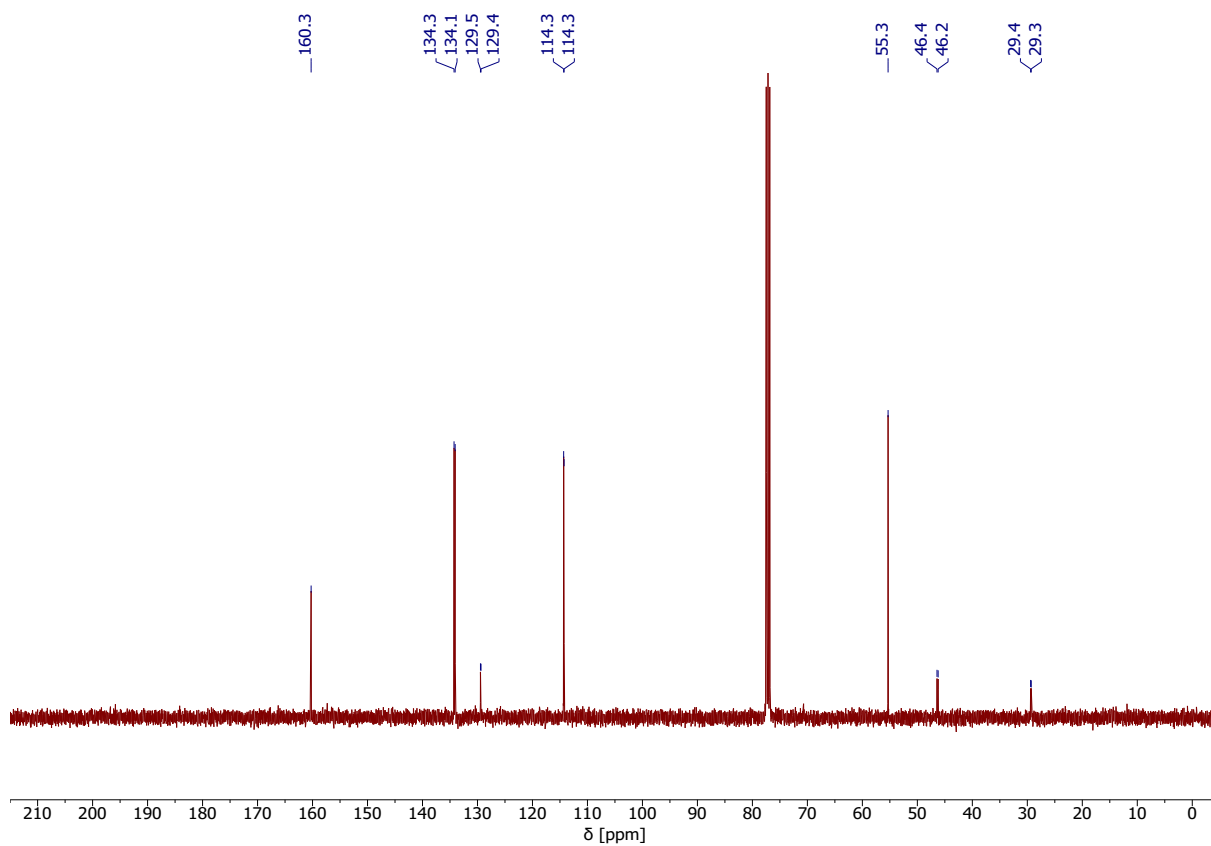

$^{31}\text{P}$  NMR (162 MHz,  $\text{CDCl}_3$ ) spectrum of **MACHO**<sup>p</sup>(OMe).

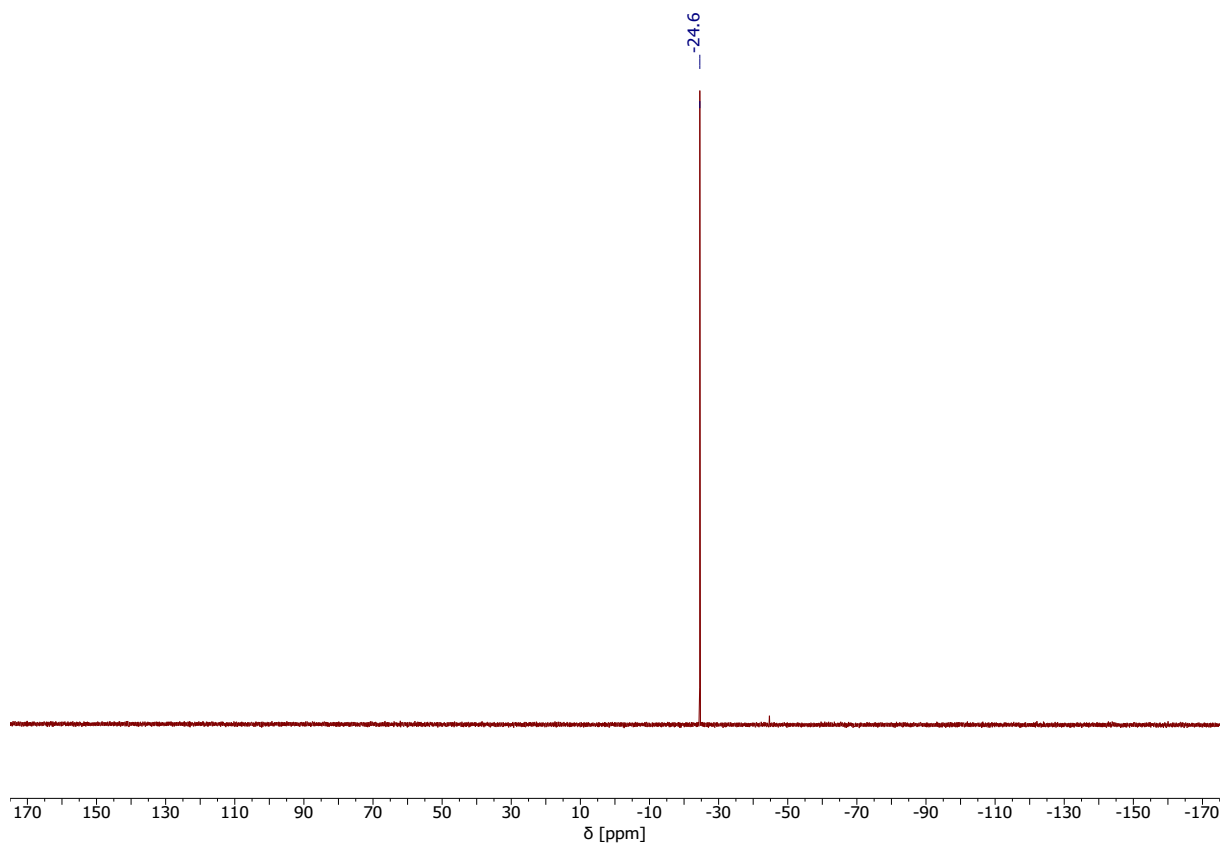

$^1\text{H}$  NMR (400 MHz,  $\text{CDCl}_3$ ) spectrum of **Ru-MACHO**<sup>p(OMe)</sup>.

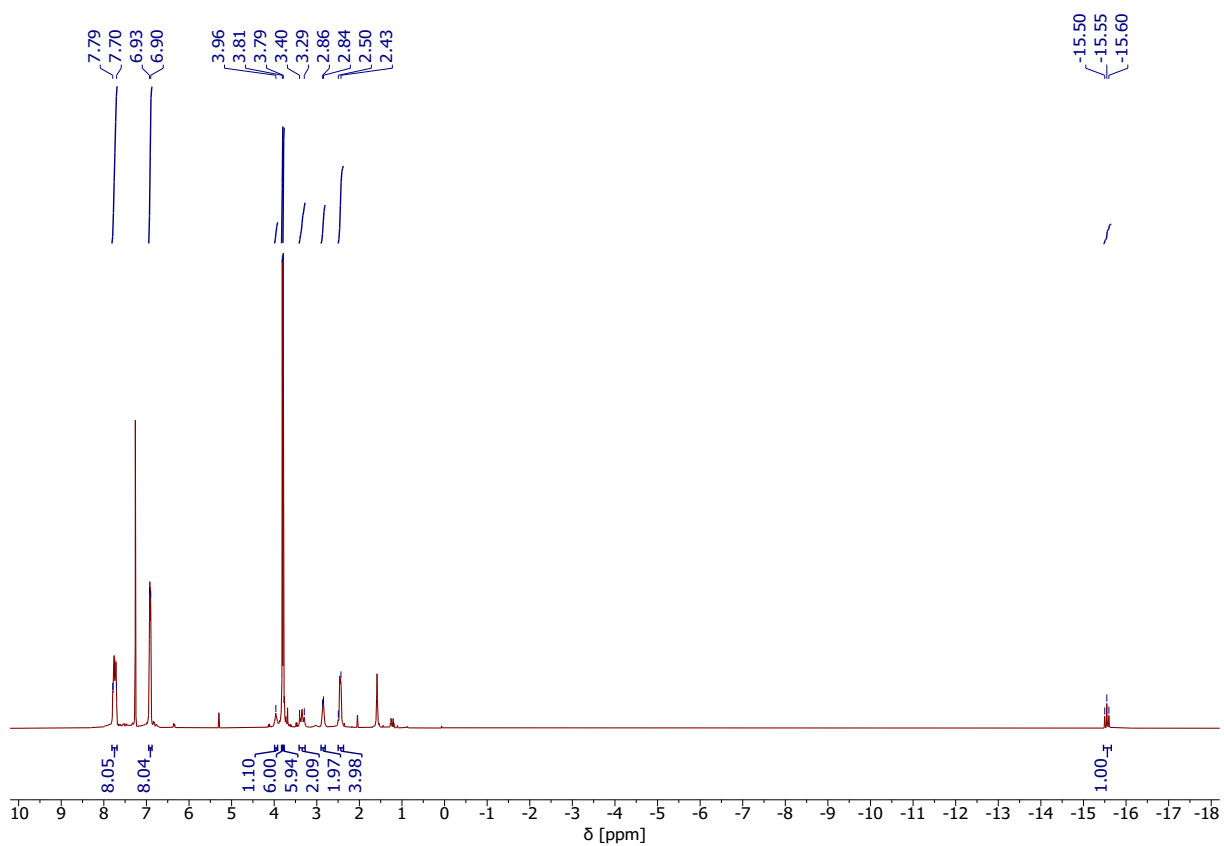

$^{13}\text{C}$  NMR (101 MHz,  $\text{CDCl}_3$ ) spectrum of **Ru-MACHO**<sup>p(OMe)</sup>.

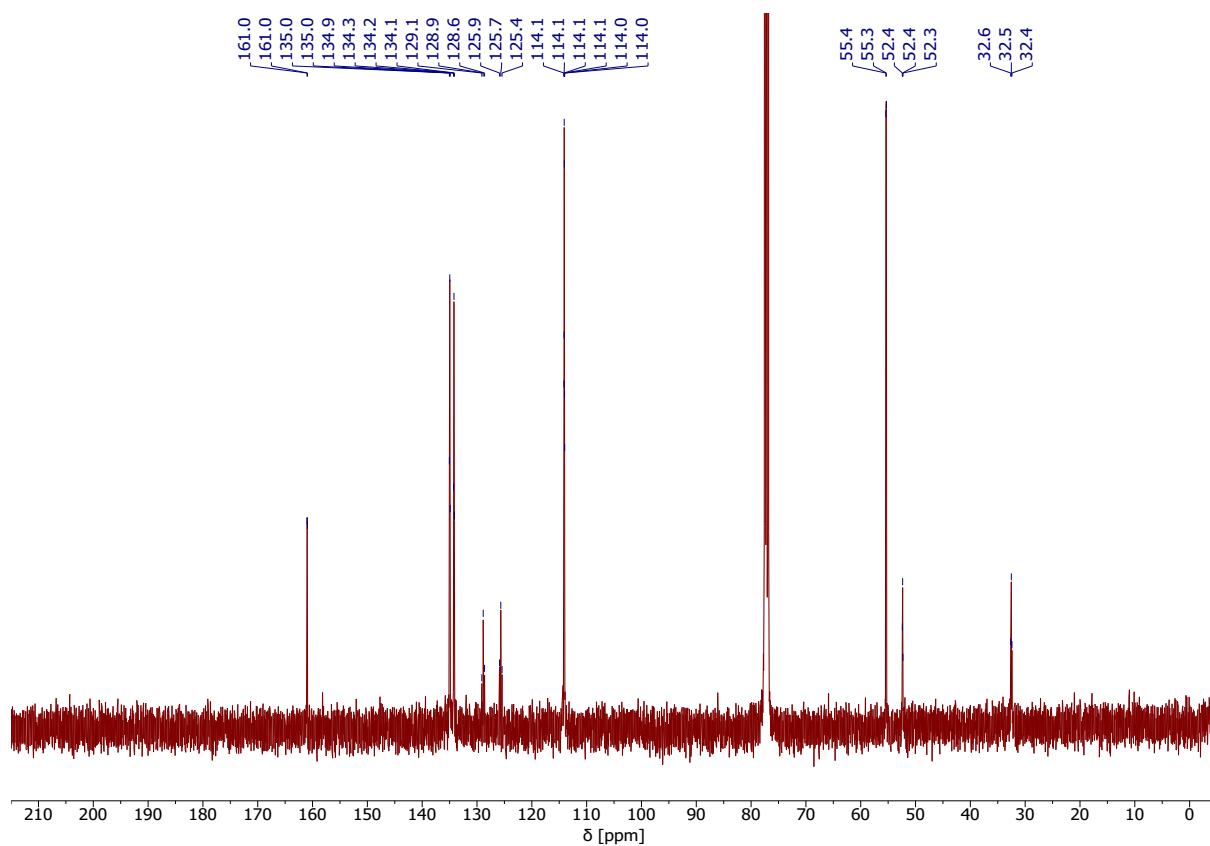

$^{31}\text{P}$  NMR (162 MHz,  $\text{CDCl}_3$ ) spectrum of **Ru-MACHO**<sup>p(OMe)</sup>.

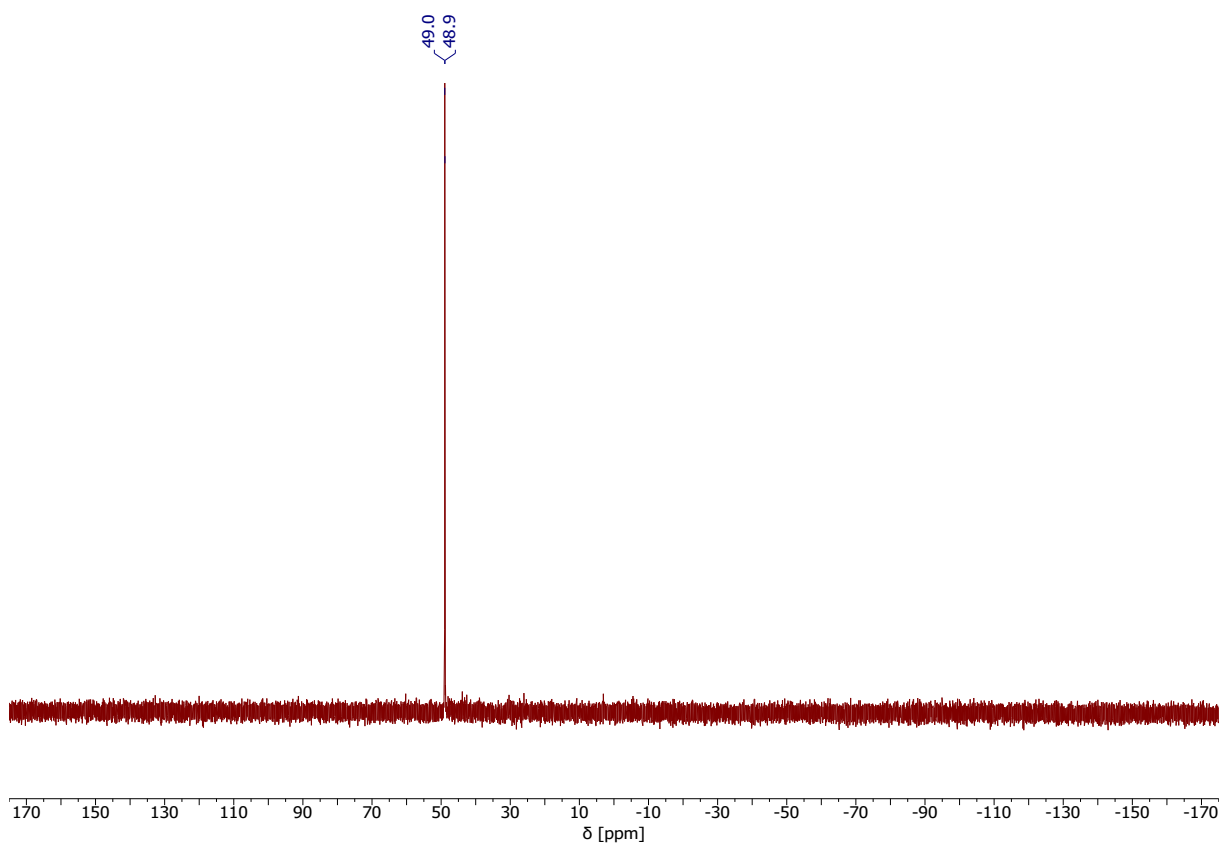

$^1\text{H}$  NMR (400 MHz,  $\text{CD}_3\text{Cl}$ ) spectrum of **Ru-MACHO**<sup>Et</sup>.

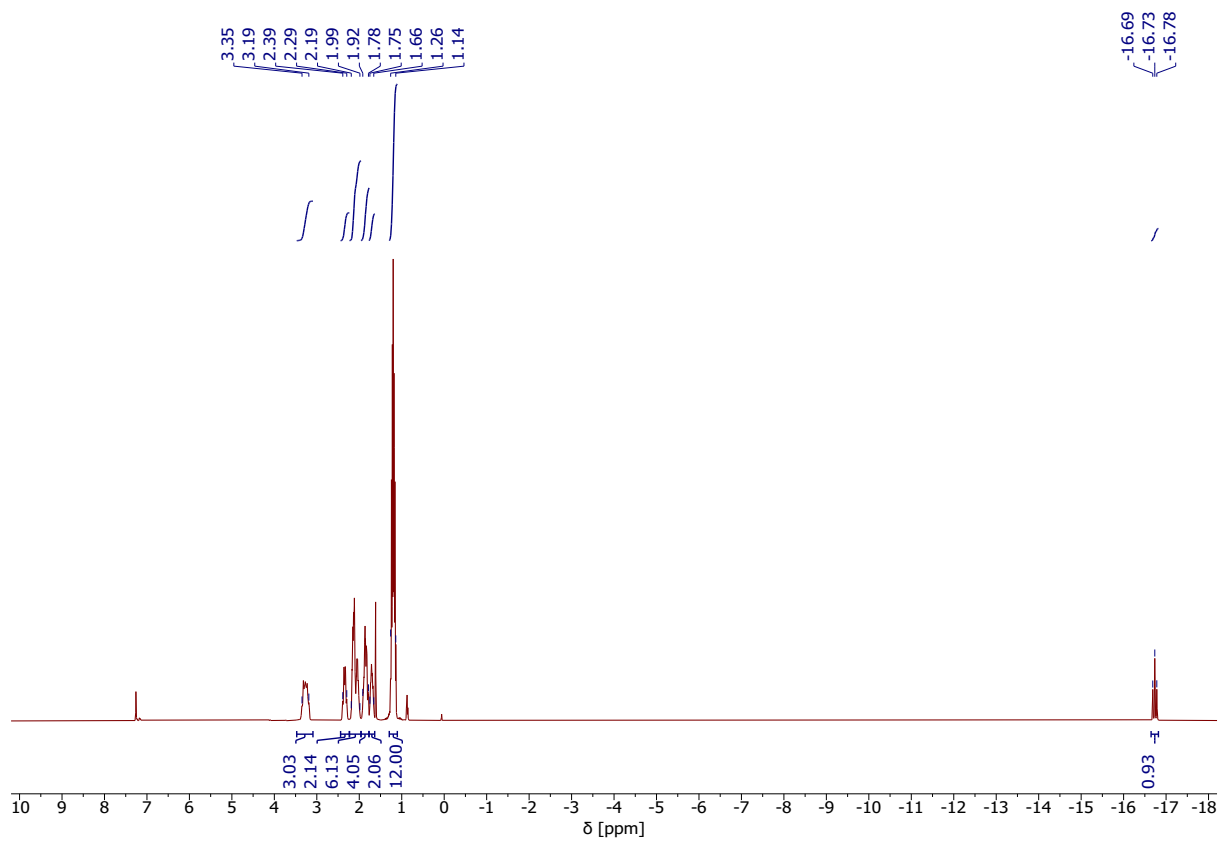

$^{13}\text{C}$  NMR (101 MHz,  $\text{CD}_3\text{Cl}$ ) spectrum of **Ru-MACHO**<sup>Et</sup>.

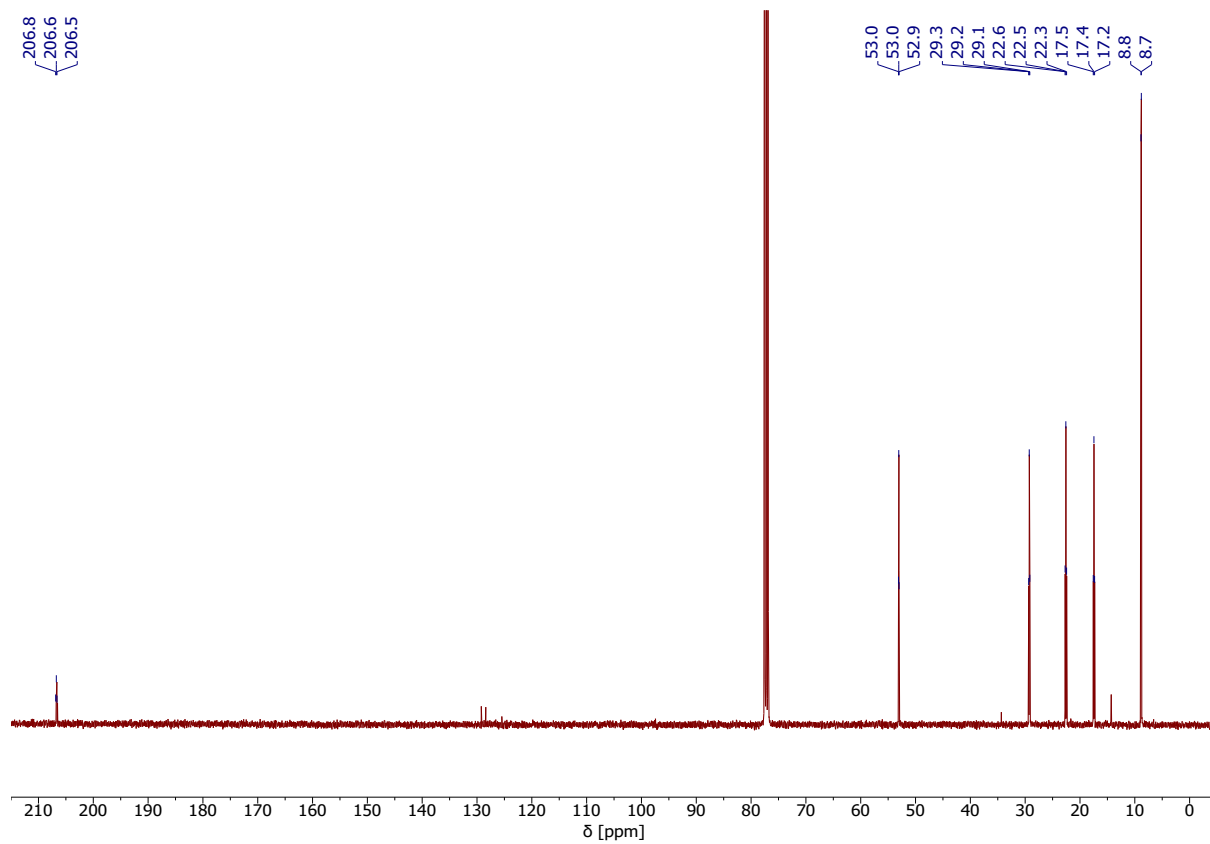

$^{31}\text{P}$  NMR (162 MHz,  $\text{CD}_3\text{Cl}$ ) spectrum of **Ru-MACHO**<sup>Et</sup>.

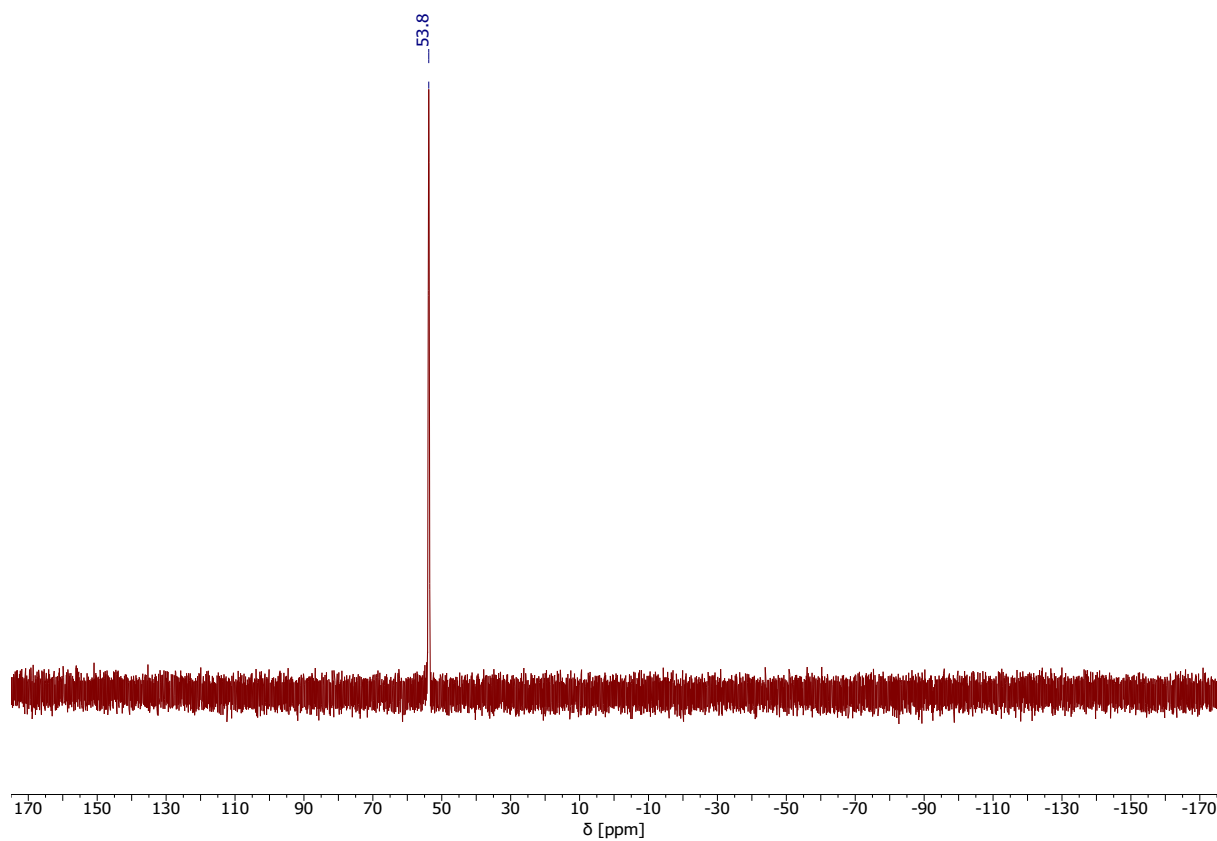

$^1\text{H}$  NMR (400 MHz,  $\text{CD}_2\text{Cl}_2$ ) spectrum of **Ru-MACHO**<sup>iPr</sup>.

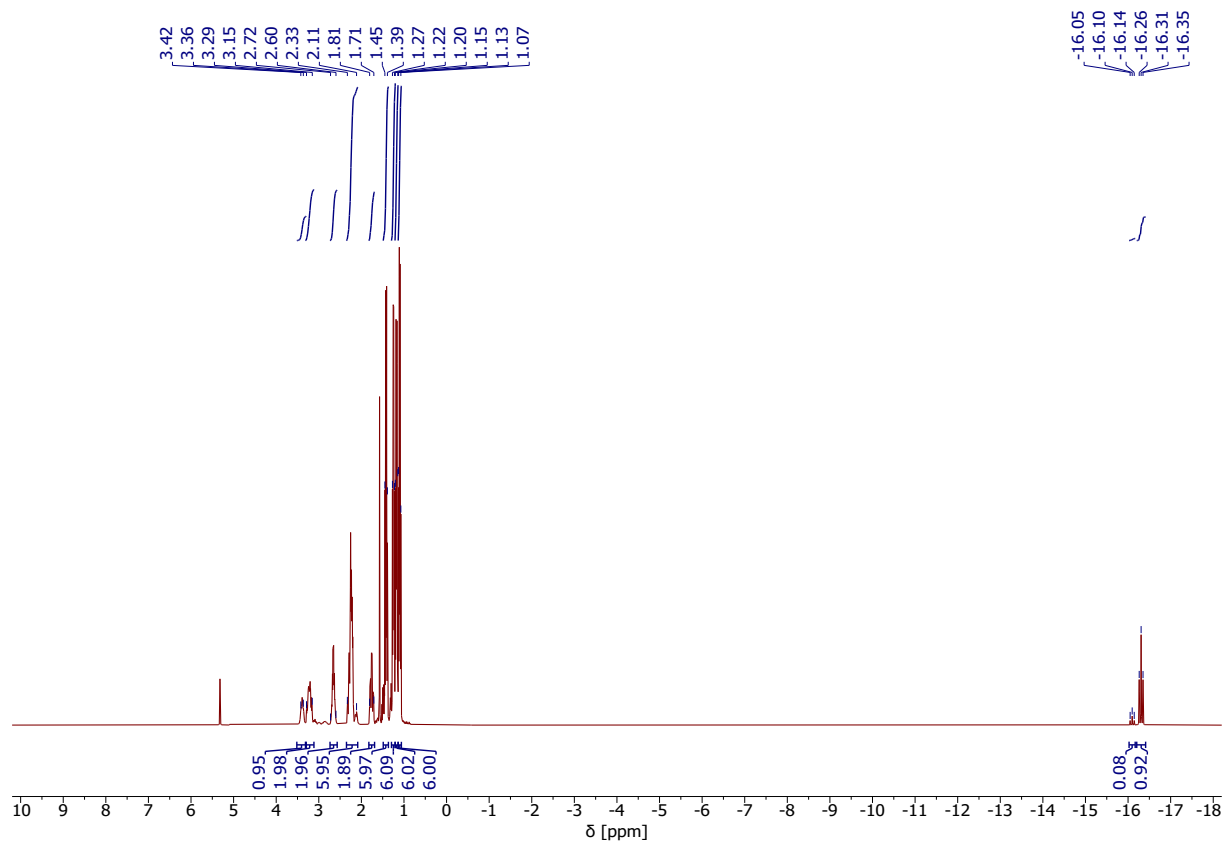

$^{13}\text{C}$  NMR (101 MHz,  $\text{CD}_2\text{Cl}_2$ ) spectrum of **Ru-MACHO**<sup>iPr</sup>.

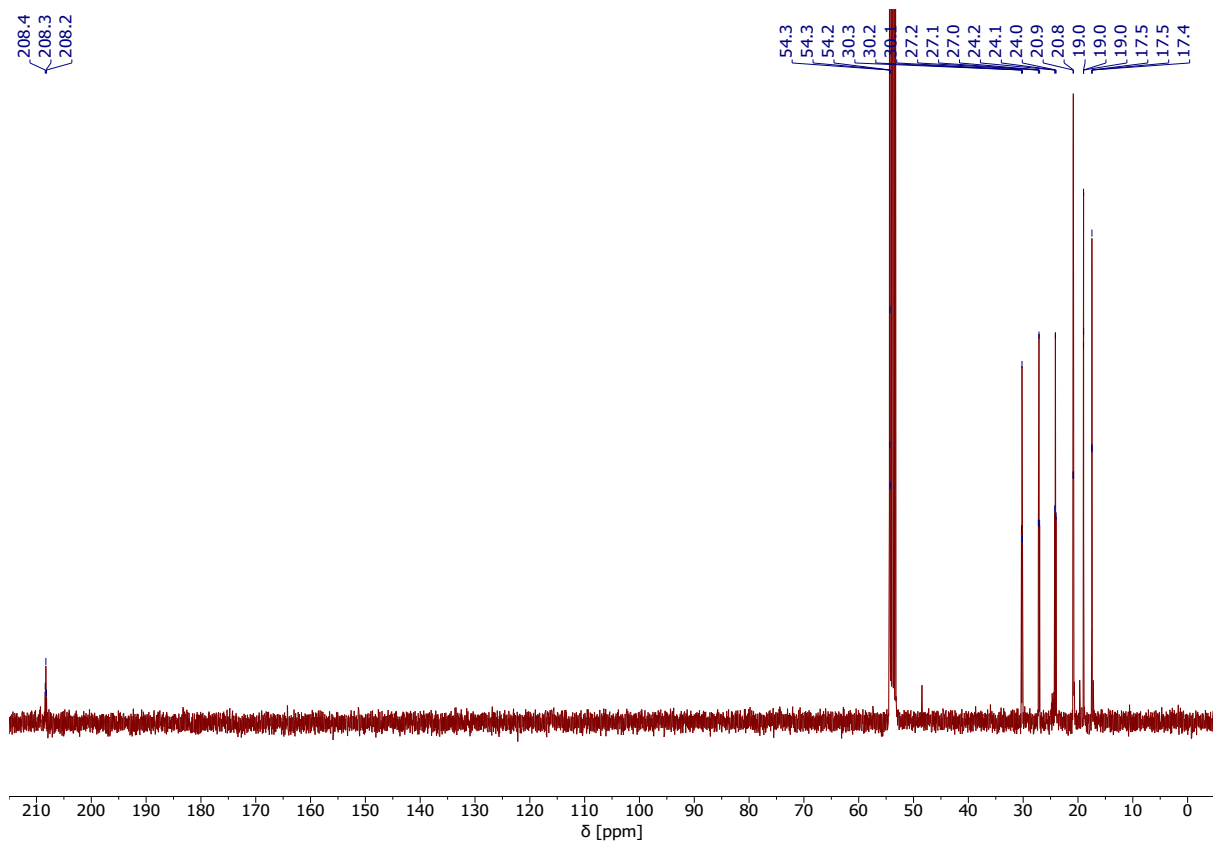

<sup>31</sup>P NMR (162 MHz, CD<sub>2</sub>Cl<sub>2</sub>) spectrum of Ru-MACHO<sup>iPr</sup>.

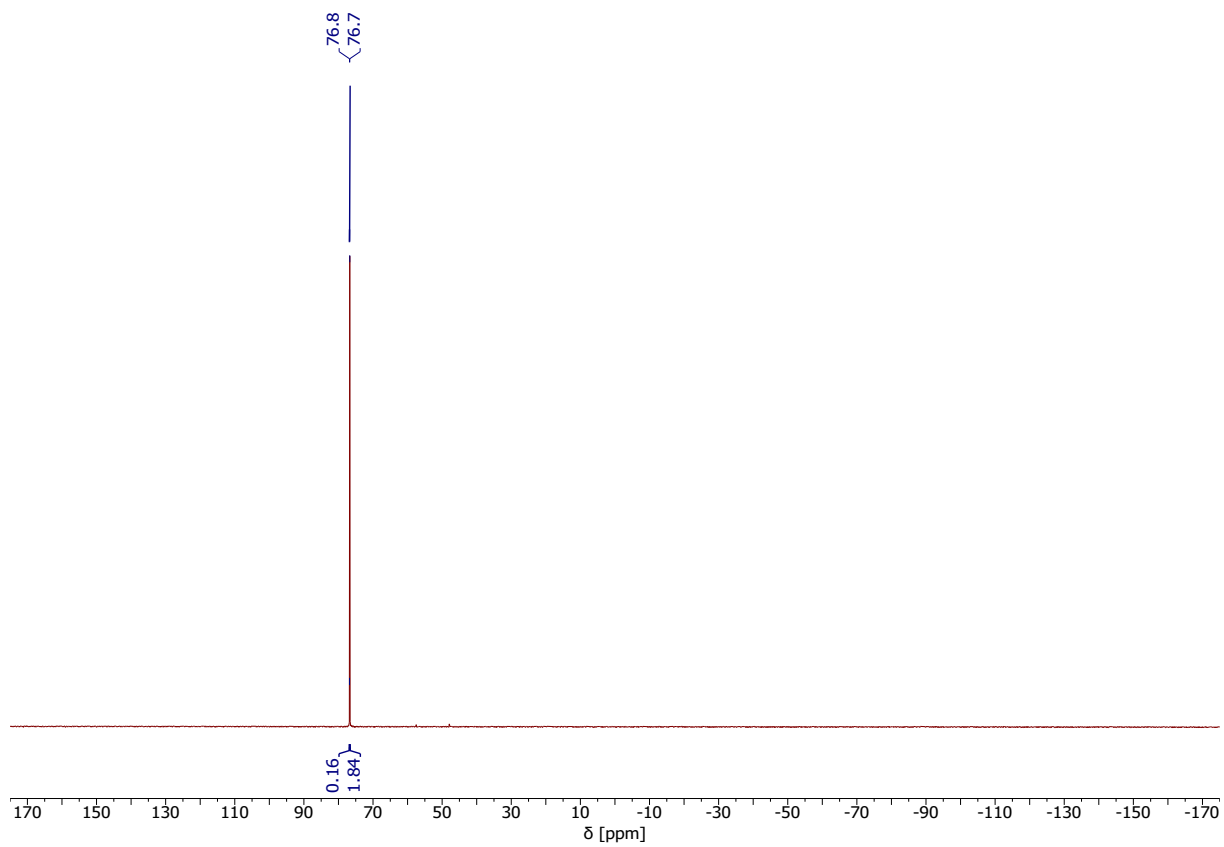

<sup>1</sup>H NMR (400 MHz, CD<sub>2</sub>Cl<sub>2</sub>) spectrum of Ru-MACHO<sup>tBu</sup>.

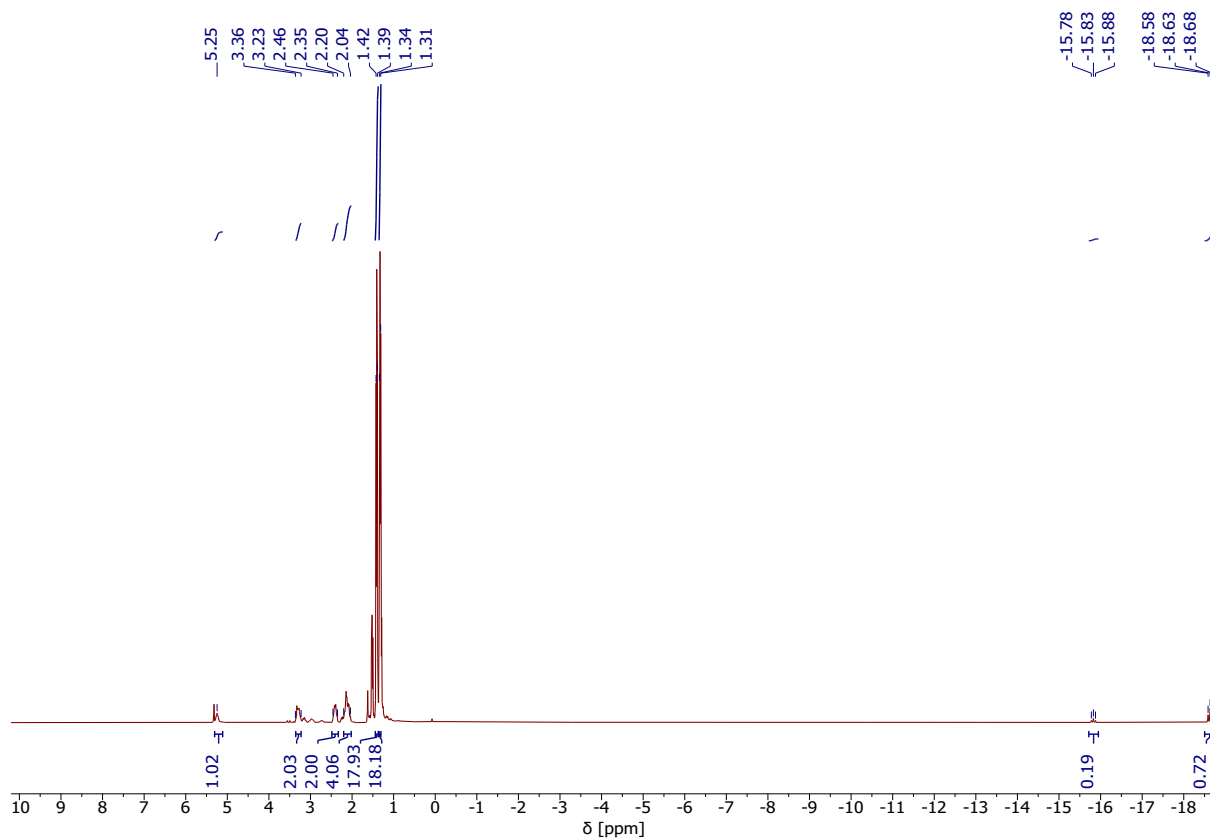

$^{13}\text{C}$  NMR (101 MHz,  $\text{CD}_2\text{Cl}_2$ ) spectrum of **Ru-MACHO<sup>t</sup>Bu**.

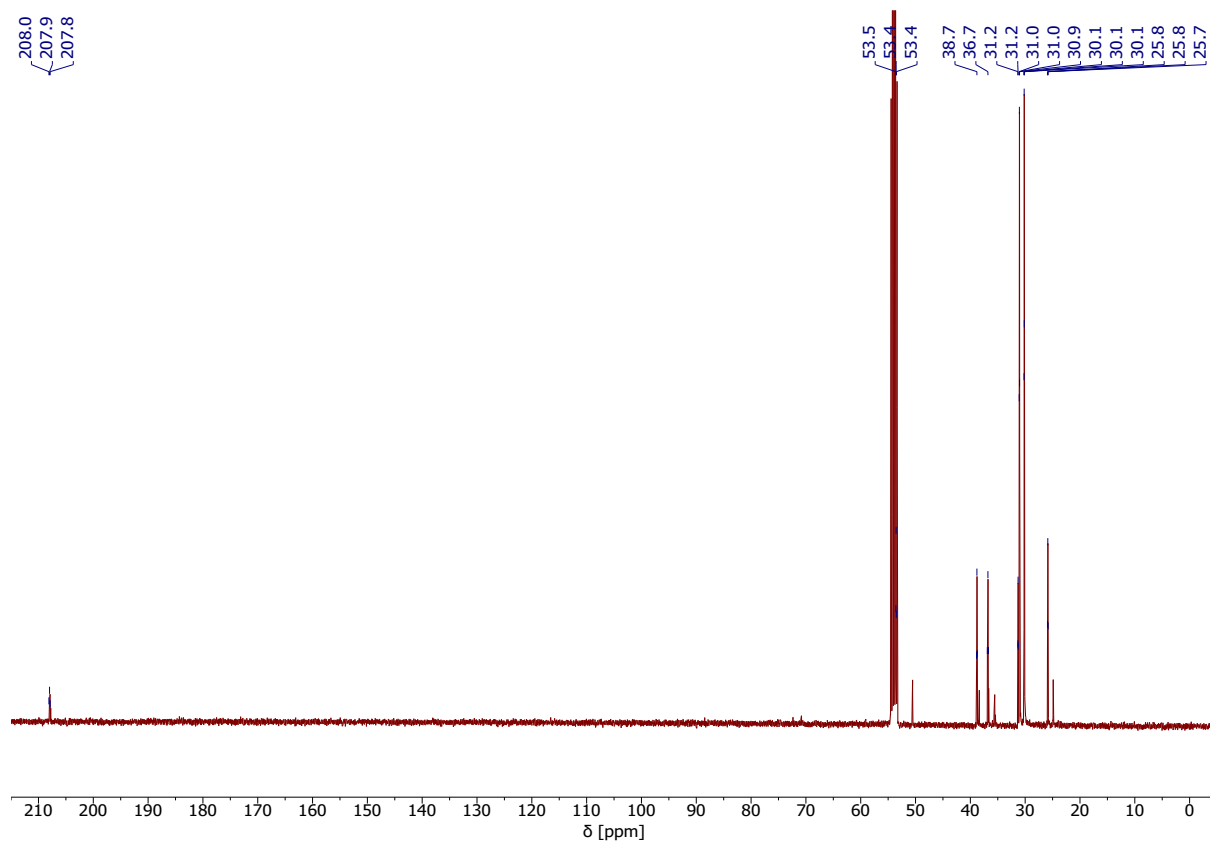

$^{31}\text{P}$  NMR (162 MHz,  $\text{CD}_2\text{Cl}_2$ ) spectrum of **Ru-MACHO<sup>tBu</sup>**.

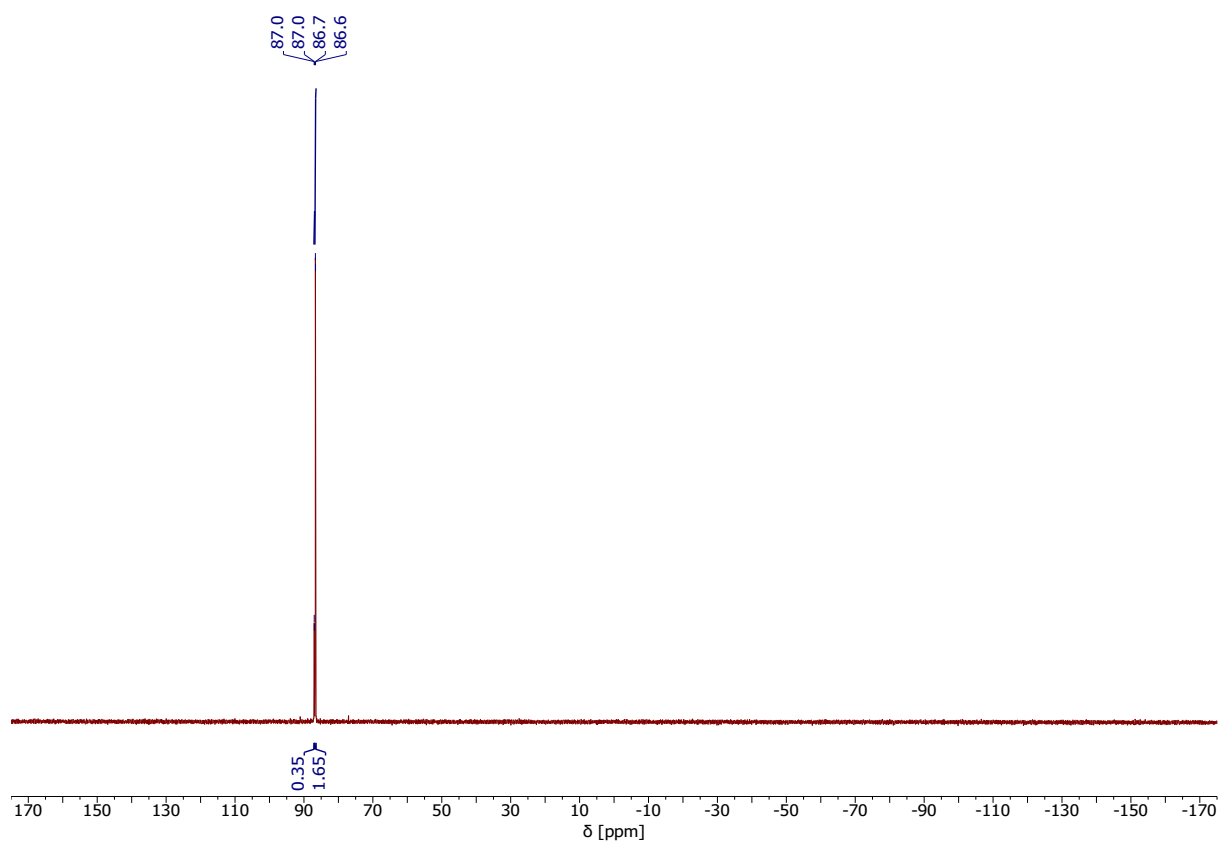

$^1\text{H}$  NMR (400 MHz,  $\text{CDCl}_3$ ) spectrum of **Ru-MACHO<sup>Cy</sup>**.

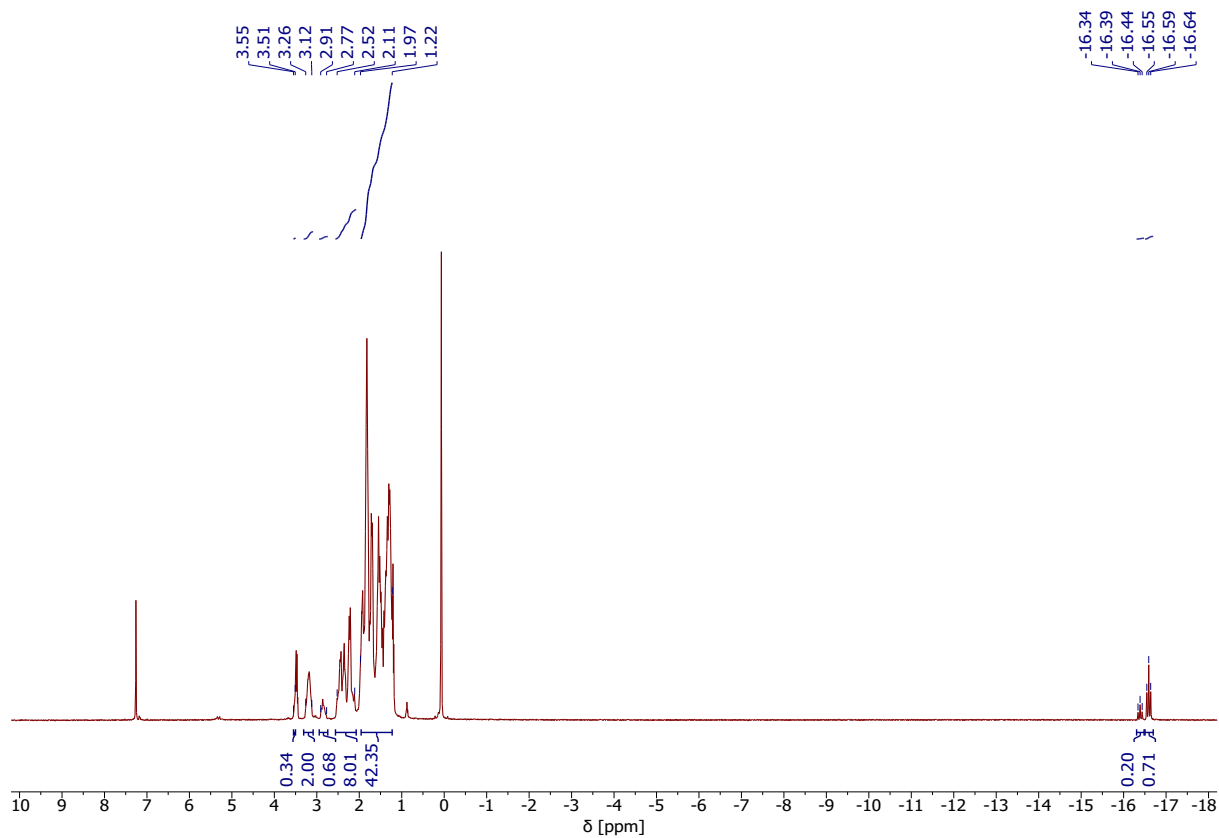

<sup>13</sup>C NMR (101 MHz, CD<sub>2</sub>Cl<sub>2</sub>) spectrum of **Ru-MACHO<sup>Cy</sup>**.

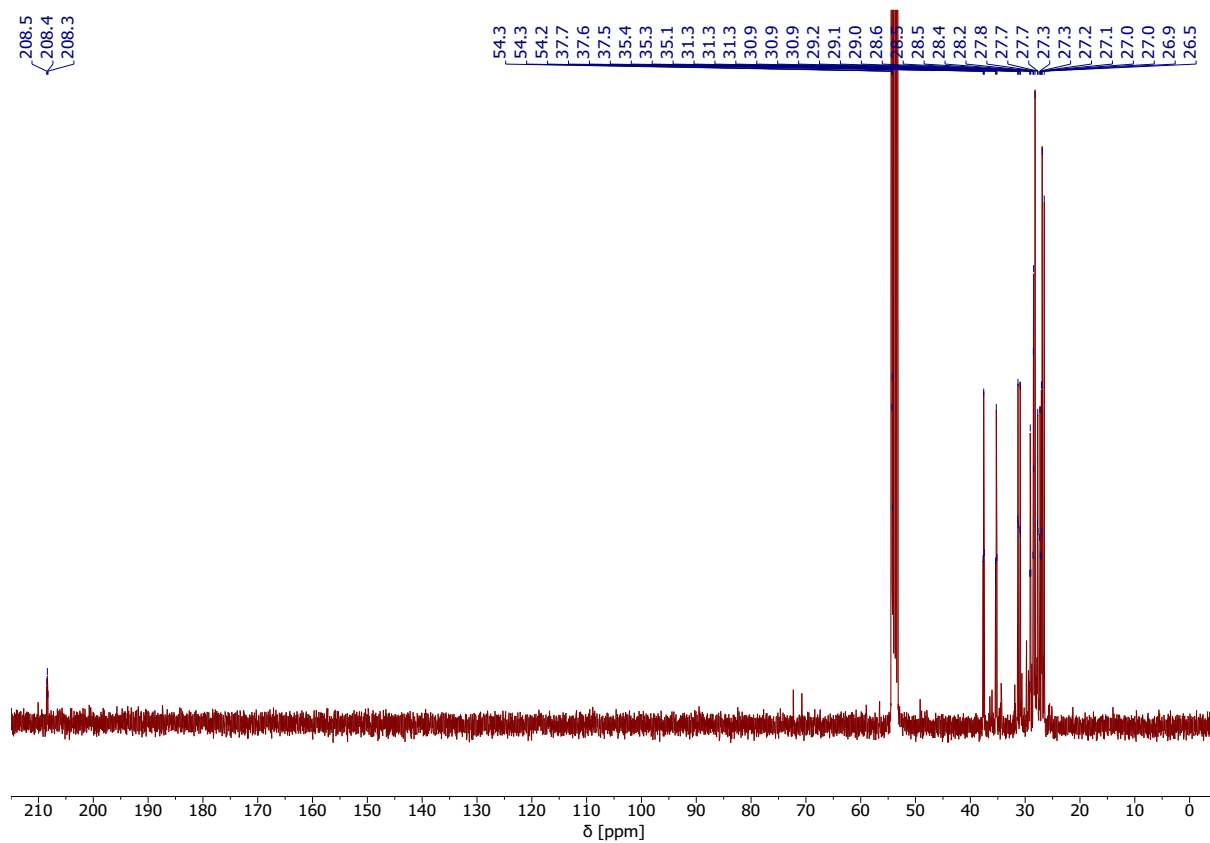

<sup>31</sup>P NMR (162 MHz, CDCl<sub>3</sub>) spectrum of **Ru-MACHO<sup>Cy</sup>**.

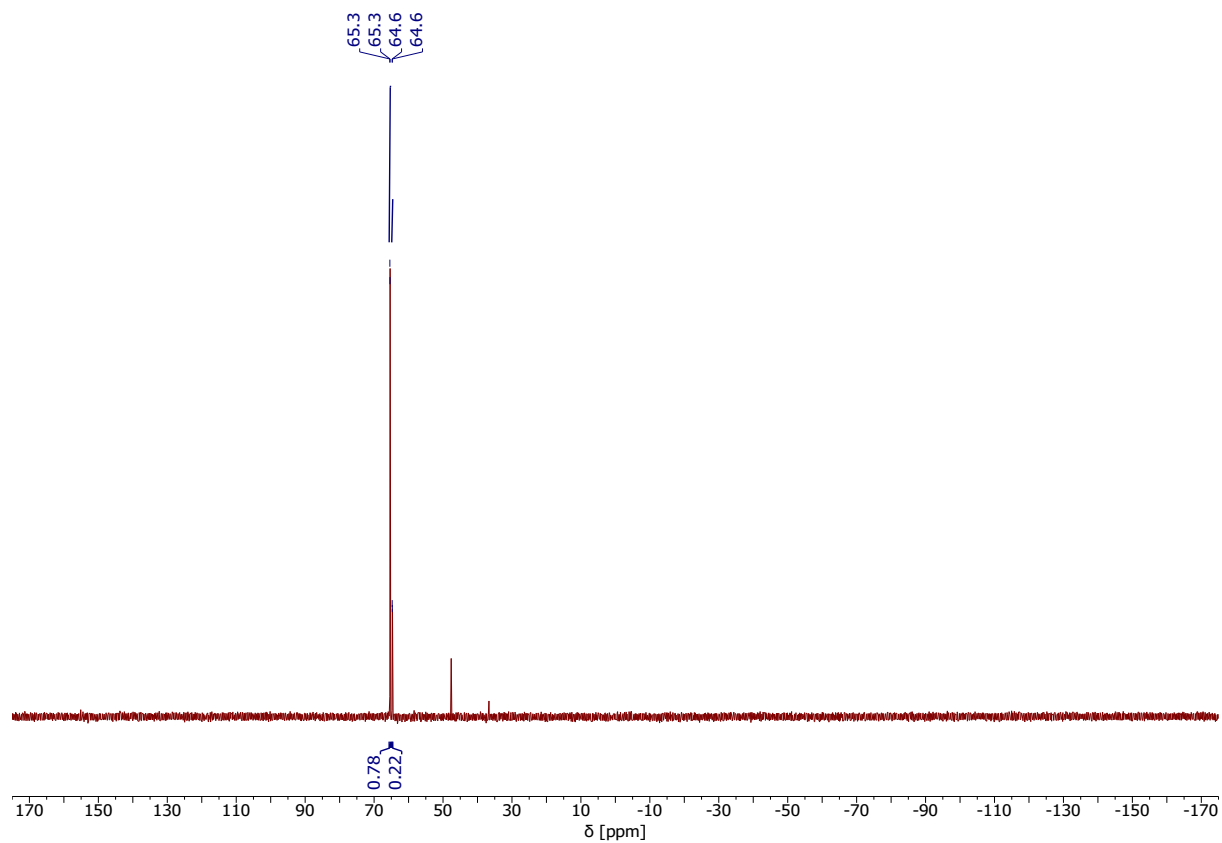

$^1\text{H}$  NMR (400 MHz,  $\text{CD}_3\text{Cl}$ ) spectrum of **Ru-MACHO<sup>Ad</sup>**.

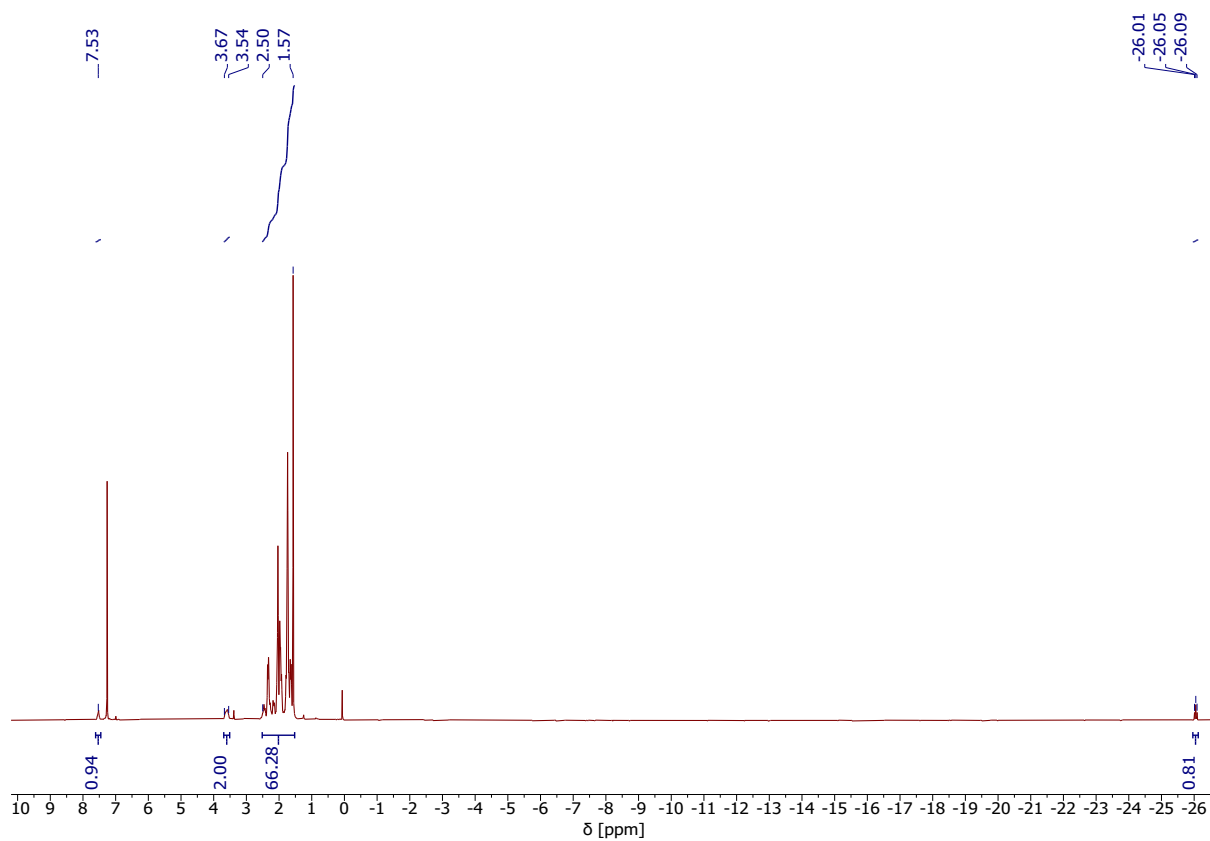

$^{13}\text{C}$  NMR (101 MHz,  $\text{CD}_3\text{Cl}$ ) spectrum of **Ru-MACHO<sup>Ad</sup>**.

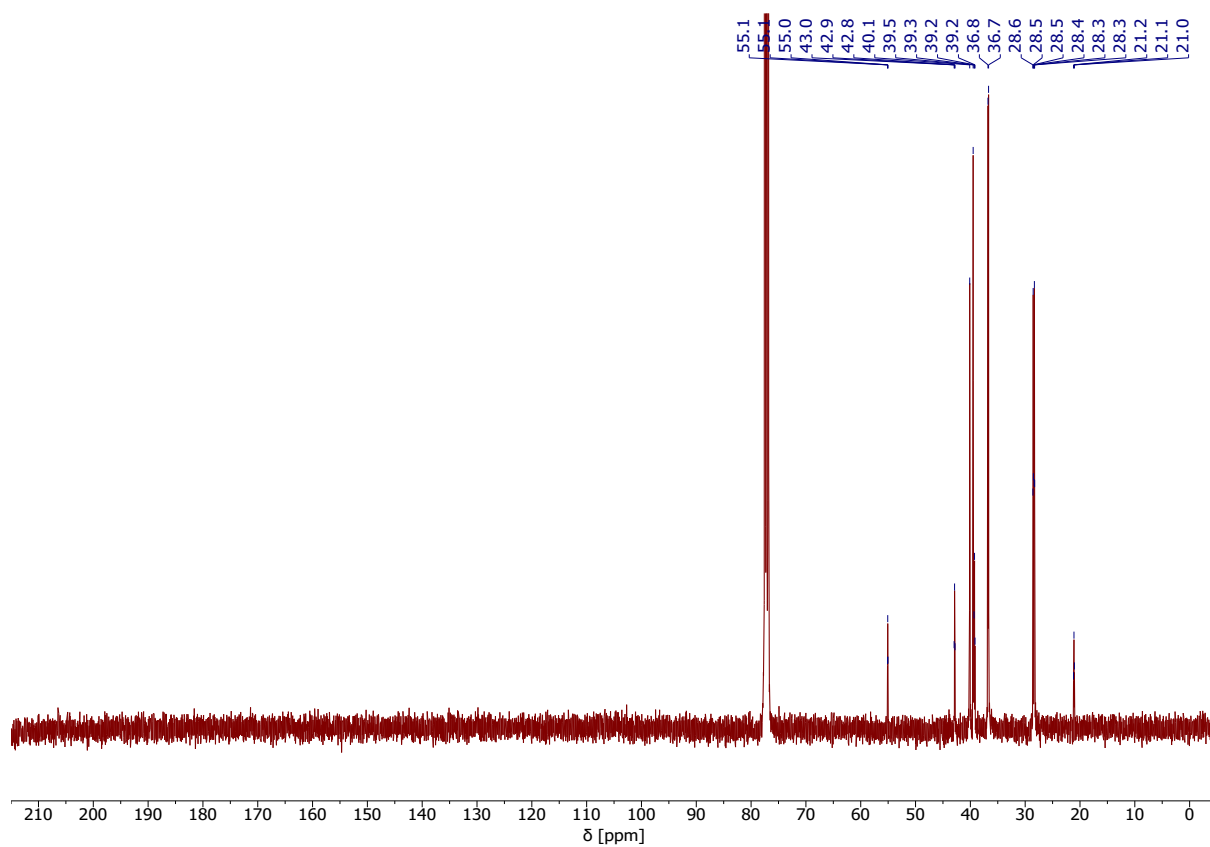

$^{31}\text{P}$  NMR (162 MHz,  $\text{CD}_3\text{Cl}$ ) spectrum of **Ru-MACHO**<sup>Ad</sup>.

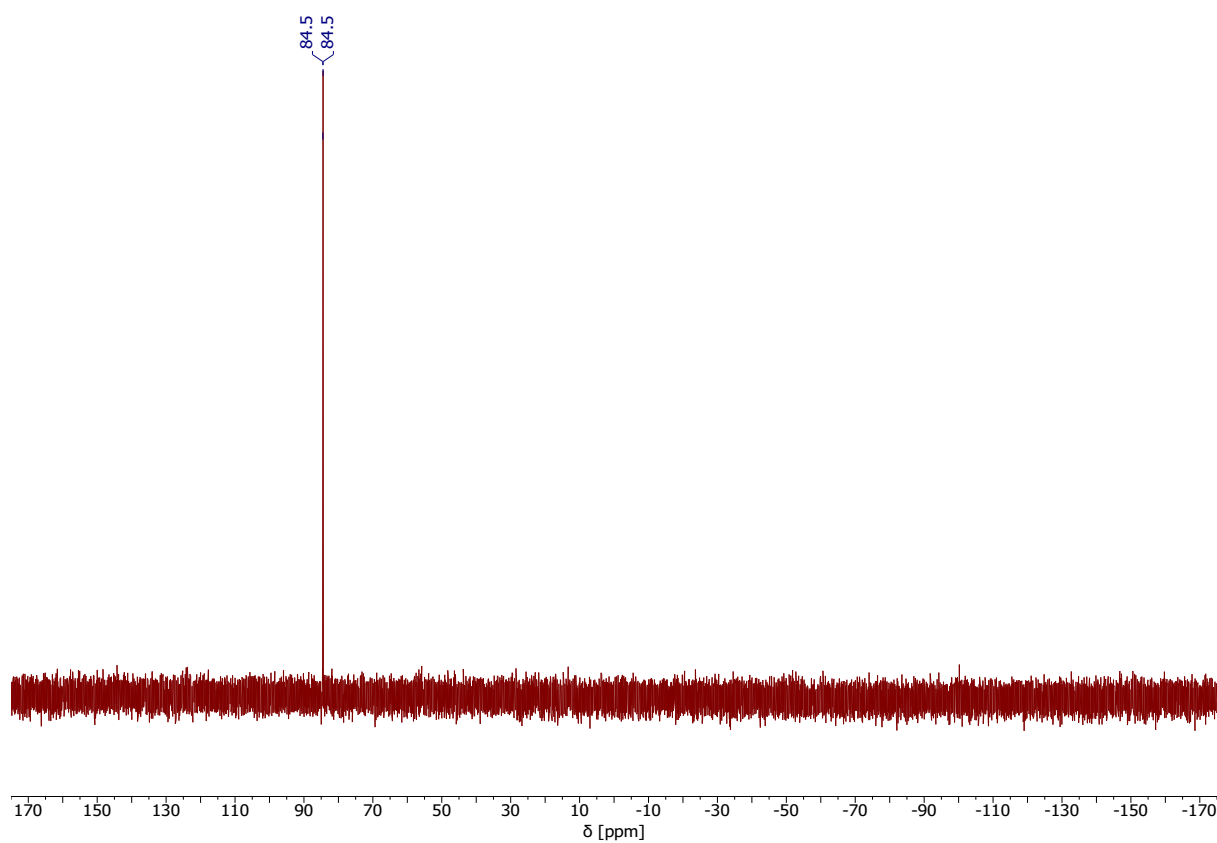

$^1\text{H}$  NMR (400 MHz,  $\text{CD}_3\text{Cl}$ ) spectrum of **NP**<sub>3</sub>.

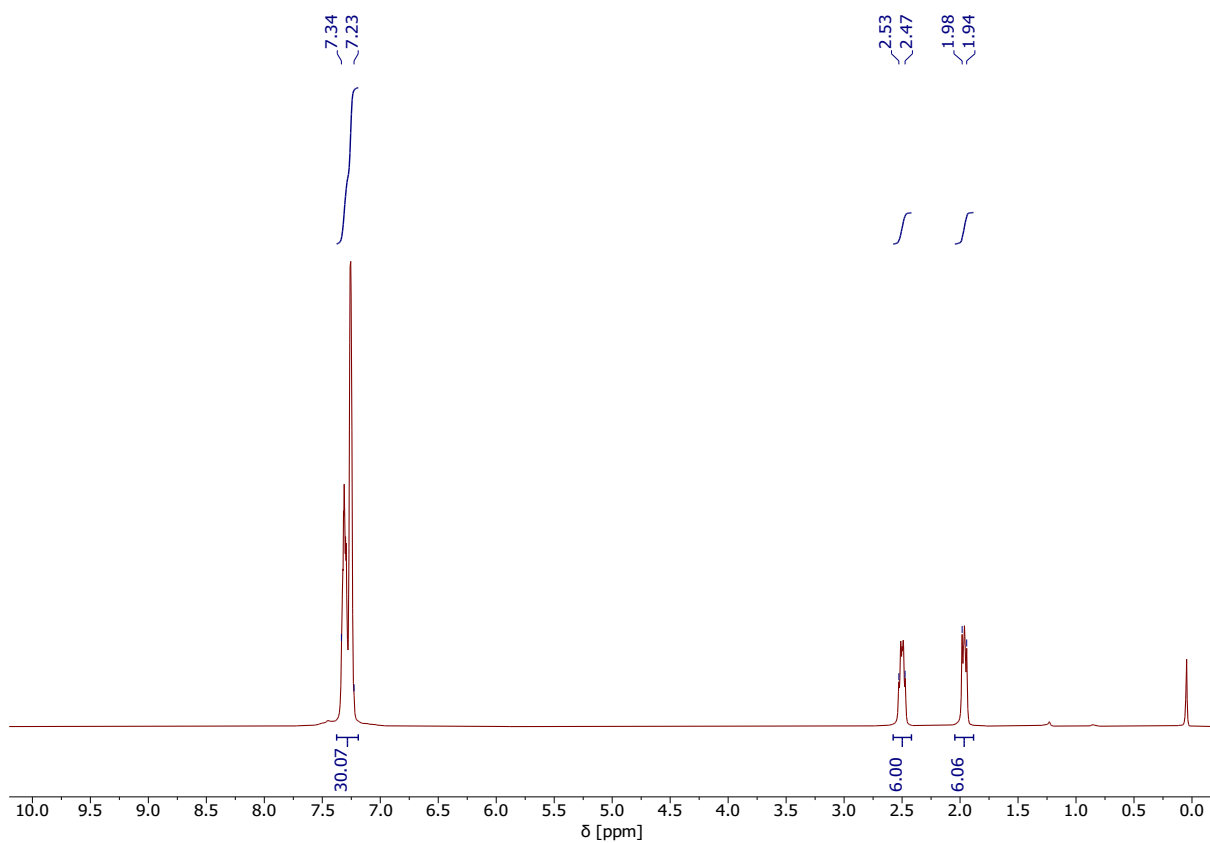

$^{13}\text{C}$  NMR (101 MHz,  $\text{CD}_3\text{Cl}$ ) spectrum of  $\text{NP}_3$ .

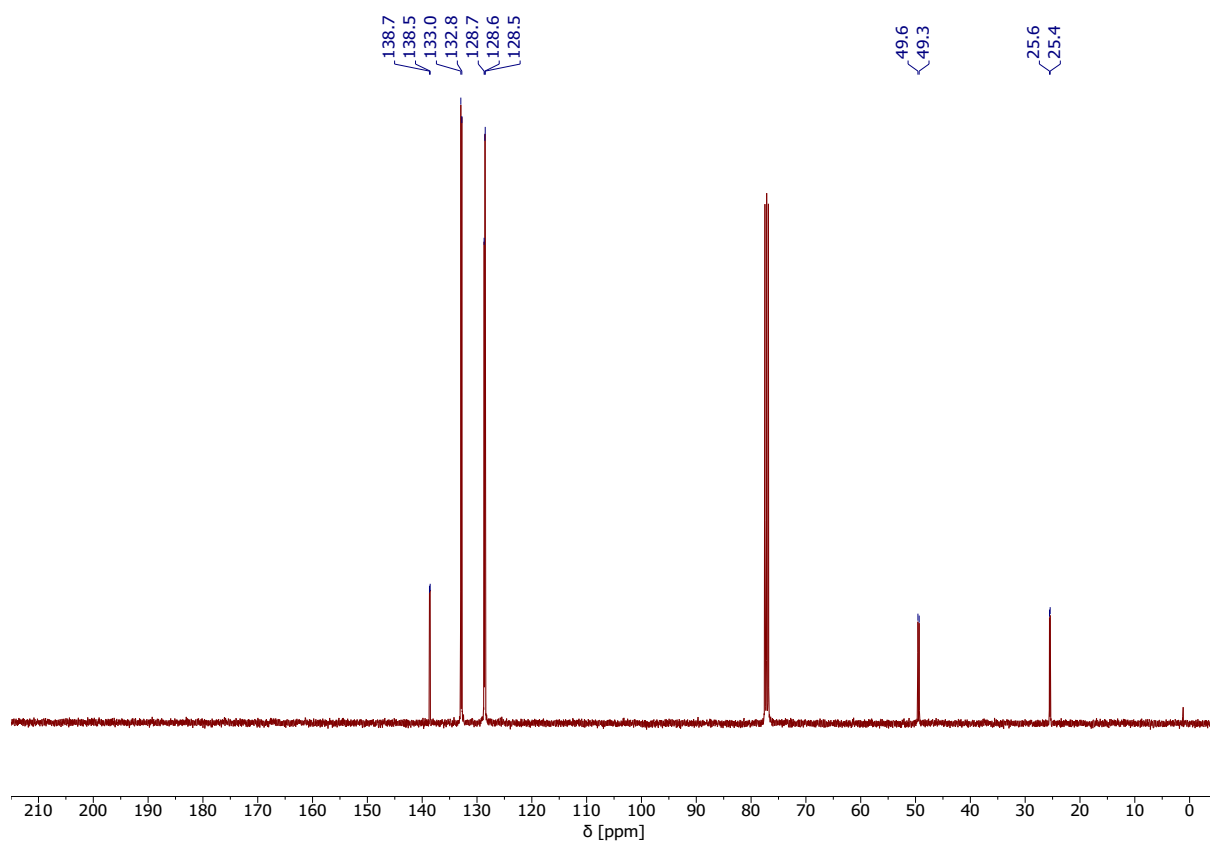

$^{31}\text{P}$  NMR (162 MHz,  $\text{CD}_3\text{Cl}$ ) spectrum of  $\text{NP}_3$ .

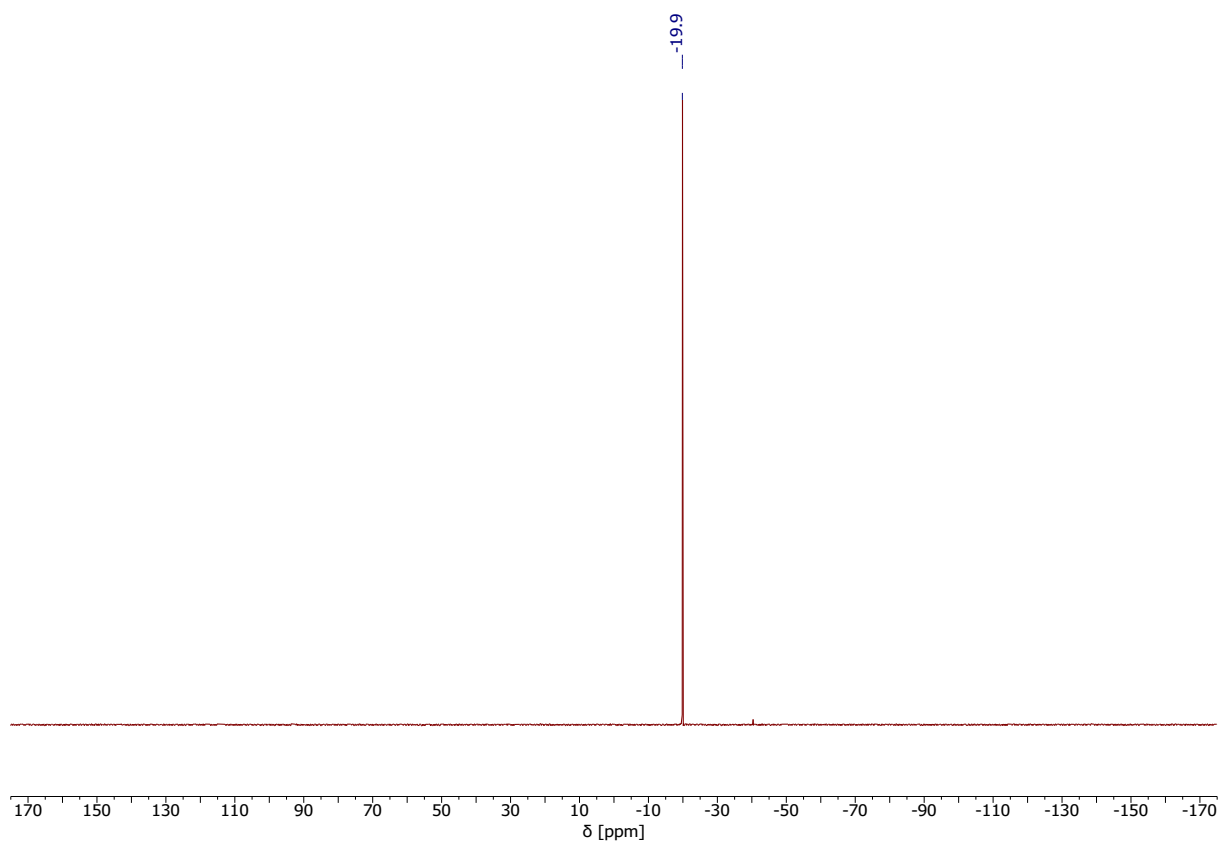

$^1\text{H}$  NMR (400 MHz,  $\text{C}_6\text{D}_6$ ) spectrum of **Ru-NP<sub>3</sub>**.

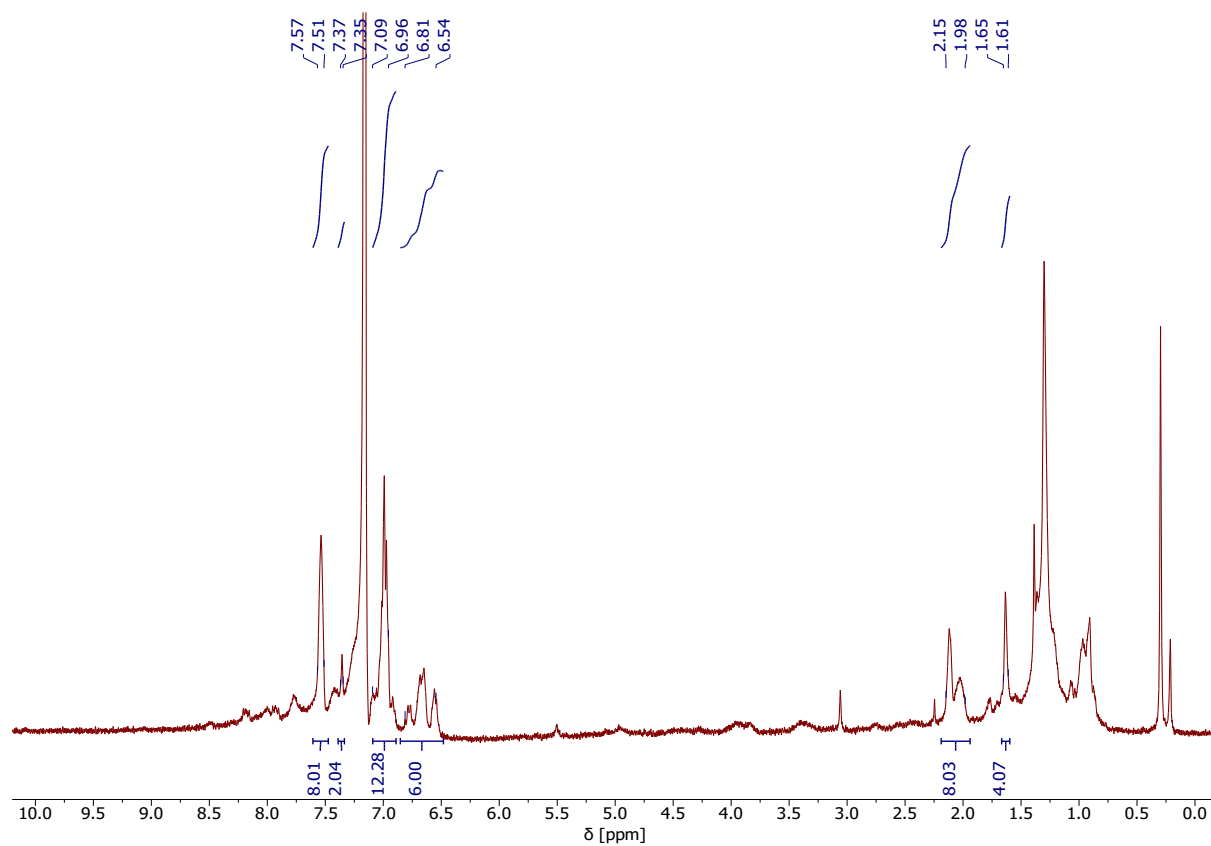

$^{31}\text{P}$  NMR (162 MHz,  $\text{C}_6\text{D}_6$ ) spectrum of **Ru-NP<sub>3</sub>**.

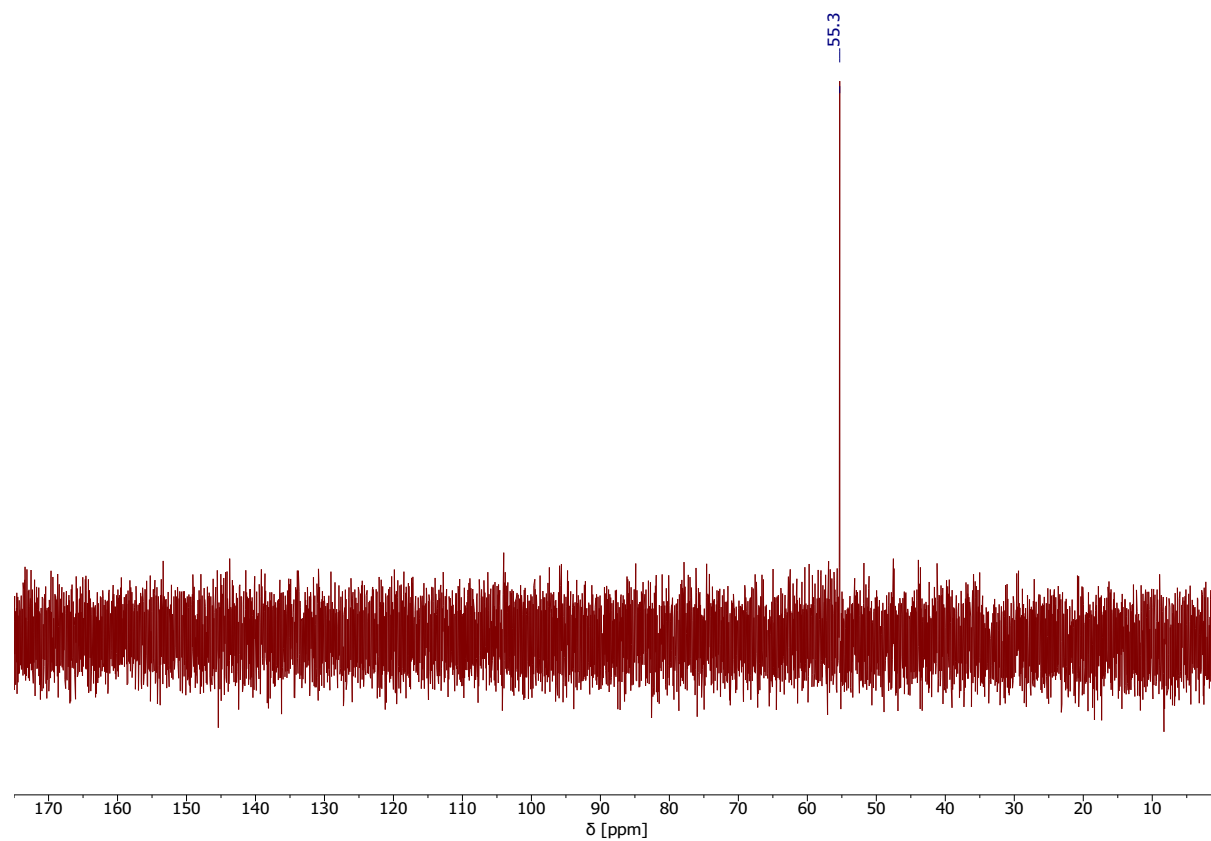

Supplement: Supplementary file 1 [file 91f01964a71856a3f317ff24.pdf]
